# Supplementary material for: Single cell analysis reveals human cytomegalovirus drives latently infected cells towards an anergic-like monocyte state
Source: eLife. 2020 Jan 22;9:e52168. doi: 10.7554/eLife.52168 (PMC7039680; doi:10.7554/eLife.52168)
Supplement: Figure 1—source data 1. [file elife-52168-fig1-data1.xlsx]

## Sheet: Table S1
Figure 1- source data 1- Correlation coefficients and Z scores between host transcript level and total HCMV transcript level across single infected CD14+ monocytes
Columns indicate- Gene name (Gene), Ensembl ID number (Gene Ensembl ID), Spearman correlation coefficient (Spearman correlation), the calculated Z score for the correlation of each gene (Spearman Z score) and 1 or 0 if the gene is cell surface marker (Surface Marker)
Gene	Gene Ensembl ID	Spearman Correlation	Spearman Z-Score	Surface Marker
APOE	ENSG00000130203	-0.533207	-7.44005	0
PSAP	ENSG00000197746	-0.509366	-7.0752	0
GRN	ENSG00000030582	-0.479637	-6.62021	0
CD74	ENSG00000019582	-0.466087	-6.41285	1
CTSD	ENSG00000117984	-0.440541	-6.02188	0
HLA-DRB1	ENSG00000196126	-0.432394	-5.8972	1
CTSA	ENSG00000064601	-0.405643	-5.4878	0
APOC1	ENSG00000130208	-0.396478	-5.34754	0
HLA-DPB1	ENSG00000223865	-0.394768	-5.32135	1
APOBEC3A	ENSG00000128383	-0.391164	-5.2662	0
HLA-DRA	ENSG00000204287	-0.378595	-5.07385	1
IFI30	ENSG00000216490	-0.371308	-4.96232	0
HLA-DQB1	ENSG00000179344	-0.357428	-4.7499	1
HLA-DPA1	ENSG00000231389	-0.33449	-4.39885	1
S100A9	ENSG00000163220	-0.331884	-4.35897	0
HLA-E	ENSG00000204592	-0.322439	-4.21442	1
HLA-DQA1	ENSG00000196735	-0.318461	-4.15354	1
LRP1	ENSG00000123384	-0.313274	-4.07416	1
TNFSF13	ENSG00000161955	-0.313041	-4.0706	1
CFD	ENSG00000197766	-0.312979	-4.06964	0
SERPINA1	ENSG00000197249	-0.312461	-4.06172	0
GPNMB	ENSG00000136235	-0.311144	-4.04156	0
IGF2R	ENSG00000197081	-0.310768	-4.03581	1
TREM2	ENSG00000095970	-0.309018	-4.00902	0
CD14	ENSG00000170458	-0.304804	-3.94453	1
CD22	ENSG00000012124	-0.303672	-3.92721	1
KCNJ5	ENSG00000120457	-0.301708	-3.89715	0
APLP2	ENSG00000084234	-0.298758	-3.852	0
CTSC	ENSG00000109861	-0.297874	-3.83847	0
SDS	ENSG00000135094	-0.29629	-3.81424	0
HS3ST2	ENSG00000122254	-0.290553	-3.72643	0
CD84	ENSG00000066294	-0.290382	-3.72382	1
CD68	ENSG00000129226	-0.288466	-3.6945	1
MARCO	ENSG00000019169	-0.286223	-3.66017	0
CAPG	ENSG00000042493	-0.284972	-3.64101	0
ATP13A3	ENSG00000133657	-0.282753	-3.60706	0
HAMP	ENSG00000105697	-0.281719	-3.59123	0
HLA-B	ENSG00000234745	-0.281196	-3.58324	1
ITGB2	ENSG00000160255	-0.270581	-3.42077	1
PPAP2B	ENSG00000162407	-0.269822	-3.40917	0
PTAFR	ENSG00000169403	-0.26795	-3.38052	0
CPM	ENSG00000135678	-0.266052	-3.35147	0
LAIR1	ENSG00000167613	-0.265219	-3.33871	1
HIF1A	ENSG00000100644	-0.264644	-3.32992	0
CD163	ENSG00000177575	-0.258012	-3.22842	1
LILRA6	ENSG00000244482	-0.255399	-3.18843	0
SLC5A3	ENSG00000198743	-0.252504	-3.14412	0
ALOX5	ENSG00000012779	-0.251577	-3.12994	0
CD300A	ENSG00000167851	-0.251095	-3.12256	1
PRRC2C	ENSG00000117523	-0.250272	-3.10997	0
ST3GAL1	ENSG00000008513	-0.2476	-3.06907	0
GAA	ENSG00000171298	-0.246066	-3.04559	0
DPP7	ENSG00000176978	-0.243922	-3.01278	0
RNF213	ENSG00000173821	-0.242729	-2.99452	0
HLA-C	ENSG00000204525	-0.242506	-2.99111	1
AHNAK	ENSG00000124942	-0.242268	-2.98747	0
RRBP1	ENSG00000125844	-0.241666	-2.97825	0
AIF1	ENSG00000204472	-0.239356	-2.9429	0
SPTBN1	ENSG00000115306	-0.236099	-2.89305	0
IFITM3	ENSG00000142089	-0.235369	-2.88189	0
CYBA	ENSG00000051523	-0.233198	-2.84866	0
FAM213B	ENSG00000157870	-0.230944	-2.81416	0
EIF3A	ENSG00000107581	-0.230675	-2.81004	0
CHCHD6	ENSG00000159685	-0.227397	-2.75987	0
FPR3	ENSG00000187474	-0.225086	-2.72452	0
LAPTM5	ENSG00000162511	-0.224765	-2.71959	0
MYO9B	ENSG00000099331	-0.222283	-2.68162	0
PLXNC1	ENSG00000136040	-0.220279	-2.65094	1
FPR1	ENSG00000171051	-0.21624	-2.58912	0
MAFB	ENSG00000204103	-0.215904	-2.58399	0
HSPH1	ENSG00000120694	-0.214857	-2.56796	0
CTSZ	ENSG00000101160	-0.214614	-2.56425	0
MAN2B1	ENSG00000104774	-0.214235	-2.55845	0
MSN	ENSG00000147065	-0.212766	-2.53597	0
SULF2	ENSG00000196562	-0.21194	-2.52333	0
FKBP15	ENSG00000119321	-0.211622	-2.51845	0
TNFRSF1B	ENSG00000028137	-0.211554	-2.51741	1
FBP1	ENSG00000165140	-0.210342	-2.49887	0
CCR1	ENSG00000163823	-0.209741	-2.48967	1
MMP9	ENSG00000100985	-0.209469	-2.48551	0
MALAT1	ENSG00000251562	-0.20889	-2.47664	0
RGL1	ENSG00000143344	-0.20867	-2.47328	0
LILRB2	ENSG00000131042	-0.207734	-2.45895	1
ITGB1	ENSG00000150093	-0.207644	-2.45757	1
GLUL	ENSG00000135821	-0.207383	-2.45357	0
HLA-A	ENSG00000206503	-0.207045	-2.4484	1
CECR1	ENSG00000093072	-0.206827	-2.44507	0
LILRB1	ENSG00000104972	-0.206533	-2.44057	1
CTSH	ENSG00000103811	-0.205416	-2.42347	0
SRRM2	ENSG00000167978	-0.204901	-2.41559	0
PTTG1IP	ENSG00000183255	-0.203075	-2.38765	0
LGALS3BP	ENSG00000108679	-0.202399	-2.37731	0
UNC93B1	ENSG00000110057	-0.202108	-2.37285	0
PARP14	ENSG00000173193	-0.201268	-2.35999	0
GUSB	ENSG00000169919	-0.201196	-2.35889	0
SIGLEC7	ENSG00000168995	-0.201068	-2.35693	1
LILRA5	ENSG00000187116	-0.201006	-2.35598	0
DAB2	ENSG00000153071	-0.200912	-2.35454	0
RDX	ENSG00000137710	-0.200551	-2.34902	0
ZNF106	ENSG00000103994	-0.200079	-2.34179	0
ZEB2	ENSG00000169554	-0.198993	-2.32517	0
CTSB	ENSG00000164733	-0.198896	-2.3237	0
TRIM25	ENSG00000121060	-0.198786	-2.32201	0
TLN1	ENSG00000137076	-0.197825	-2.3073	0
GJB2	ENSG00000165474	-0.197796	-2.30685	0
FYB	ENSG00000082074	-0.197717	-2.30565	0
TNFRSF14	ENSG00000157873	-0.197371	-2.30036	1
MBP	ENSG00000197971	-0.197191	-2.2976	0
NUFIP2	ENSG00000108256	-0.196077	-2.28055	0
SMC1A	ENSG00000072501	-0.195914	-2.27806	0
FXYD6	ENSG00000137726	-0.195801	-2.27633	0
CTSL	ENSG00000135047	-0.195125	-2.26598	0
THRAP3	ENSG00000054118	-0.194946	-2.26324	0
TGOLN2	ENSG00000152291	-0.19464	-2.25856	0
CD4	ENSG00000010610	-0.194089	-2.25013	1
CTSS	ENSG00000163131	-0.192761	-2.2298	0
RASSF4	ENSG00000107551	-0.192161	-2.22062	0
MX1	ENSG00000157601	-0.191895	-2.21655	0
RP11-1143G9.4	ENSG00000257764	-0.191751	-2.21434	0
SLA	ENSG00000155926	-0.191416	-2.20921	0
HSP90B1	ENSG00000166598	-0.191233	-2.20642	0
CHD4	ENSG00000111642	-0.190814	-2.20001	0
LYZ	ENSG00000090382	-0.190255	-2.19145	0
TRIP12	ENSG00000153827	-0.190192	-2.19049	0
SCIMP	ENSG00000161929	-0.189631	-2.1819	0
TTYH3	ENSG00000136295	-0.187978	-2.15659	0
FAM20C	ENSG00000177706	-0.187619	-2.15111	0
ZBED1	ENSG00000214717	-0.187503	-2.14933	0
PSMB10	ENSG00000205220	-0.186806	-2.13867	0
DDI2	ENSG00000197312	-0.186666	-2.13652	0
ARHGAP25	ENSG00000163219	-0.1863	-2.13092	0
TYMP	ENSG00000025708	-0.186095	-2.12779	0
P2RX7	ENSG00000089041	-0.185861	-2.1242	0
FDX1	ENSG00000137714	-0.185475	-2.1183	0
ACBD3	ENSG00000182827	-0.184299	-2.10029	0
CD81	ENSG00000110651	-0.18367	-2.09067	1
DRAM1	ENSG00000136048	-0.183452	-2.08734	0
KIDINS220	ENSG00000134313	-0.183082	-2.08167	0
CALR	ENSG00000179218	-0.183014	-2.08063	0
MTDH	ENSG00000147649	-0.182994	-2.08033	0
LILRB4	ENSG00000186818	-0.182798	-2.07732	1
HIST1H1E	ENSG00000168298	-0.182476	-2.0724	0
FCGR1A	ENSG00000150337	-0.182167	-2.06767	1
NBPF10	ENSG00000163386	-0.181976	-2.06475	0
LRRFIP1	ENSG00000124831	-0.181839	-2.06264	0
TLE3	ENSG00000140332	-0.181635	-2.05953	0
RARRES1	ENSG00000118849	-0.181093	-2.05123	0
HLA-DQA2	ENSG00000237541	-0.180771	-2.0463	1
DDAH2	ENSG00000213722	-0.179866	-2.03245	0
PNPLA6	ENSG00000032444	-0.179816	-2.03169	0
PLEKHA2	ENSG00000169499	-0.179687	-2.02971	0
HEXA	ENSG00000213614	-0.179464	-2.0263	0
PAG1	ENSG00000076641	-0.178977	-2.01885	0
IQGAP1	ENSG00000140575	-0.178663	-2.01404	0
KLHL6	ENSG00000172578	-0.178643	-2.01373	0
CUX1	ENSG00000257923	-0.177604	-1.99784	0
KIAA0513	ENSG00000135709	-0.177473	-1.99584	0
STAT3	ENSG00000168610	-0.177124	-1.99048	0
PIK3IP1	ENSG00000100100	-0.176996	-1.98853	0
DNASE2	ENSG00000105612	-0.176136	-1.97536	0
AMDHD2	ENSG00000162066	-0.176034	-1.97381	0
B4GALT5	ENSG00000158470	-0.175909	-1.97189	0
ATP11A	ENSG00000068650	-0.175702	-1.96872	0
LTA4H	ENSG00000111144	-0.174978	-1.95764	0
CYTH1	ENSG00000108669	-0.174629	-1.95231	0
DYNC1LI2	ENSG00000135720	-0.174343	-1.94793	0
MS4A4A	ENSG00000110079	-0.174123	-1.94455	0
CFB	ENSG00000244255	-0.174104	-1.94427	0
CREBBP	ENSG00000005339	-0.173431	-1.93397	0
PLOD3	ENSG00000106397	-0.173211	-1.9306	0
SWAP70	ENSG00000133789	-0.173162	-1.92985	0
PLXDC2	ENSG00000120594	-0.173142	-1.92955	0
CHD8	ENSG00000100888	-0.173142	-1.92955	0
ITPRIPL2	ENSG00000205730	-0.172965	-1.92684	0
RAB11FIP1	ENSG00000156675	-0.172509	-1.91987	0
KLF3	ENSG00000109787	-0.172419	-1.91848	0
PRAM1	ENSG00000133246	-0.172282	-1.91639	0
LITAF	ENSG00000189067	-0.172174	-1.91473	0
GLTP	ENSG00000139433	-0.172097	-1.91355	0
PFKL	ENSG00000141959	-0.171814	-1.90923	0
CD300LF	ENSG00000186074	-0.171628	-1.90637	1
ZNFX1	ENSG00000124201	-0.171543	-1.90507	0
HIPK2	ENSG00000064393	-0.171387	-1.90268	0
VAC14	ENSG00000103043	-0.171378	-1.90256	0
RP11-544M22.13	ENSG00000270149	-0.171349	-1.90211	0
ABHD2	ENSG00000140526	-0.171217	-1.90008	0
CCL18	ENSG00000006074	-0.171139	-1.89889	0
BLVRB	ENSG00000090013	-0.17081	-1.89386	0
HLA-DMB	ENSG00000242574	-0.170556	-1.88997	1
TPM3	ENSG00000143549	-0.170151	-1.88378	0
SCARB1	ENSG00000073060	-0.170077	-1.88264	0
EPB41	ENSG00000159023	-0.170002	-1.88149	0
PTPRC	ENSG00000081237	-0.169809	-1.87854	1
MGLL	ENSG00000074416	-0.169609	-1.87548	0
OAS3	ENSG00000111331	-0.169442	-1.87293	0
KCNQ1	ENSG00000053918	-0.16901	-1.86631	0
CAST	ENSG00000153113	-0.168816	-1.86334	0
NCALD	ENSG00000104490	-0.168757	-1.86244	0
IL4I1	ENSG00000104951	-0.168729	-1.862	0
GIGYF2	ENSG00000204120	-0.168645	-1.86073	0
LYN	ENSG00000254087	-0.168573	-1.85962	0
CSF2RB	ENSG00000100368	-0.168456	-1.85783	1
C2	ENSG00000166278	-0.168271	-1.855	0
FNIP2	ENSG00000052795	-0.168039	-1.85145	0
MYO5A	ENSG00000197535	-0.167785	-1.84756	0
NCOR2	ENSG00000196498	-0.167692	-1.84614	0
RAB42	ENSG00000188060	-0.167556	-1.84406	0
TSPAN4	ENSG00000214063	-0.167505	-1.84328	0
EIF4G2	ENSG00000110321	-0.167497	-1.84315	0
IFIH1	ENSG00000115267	-0.167091	-1.83694	0
YWHAB	ENSG00000166913	-0.165528	-1.81302	0
PLAU	ENSG00000122861	-0.165455	-1.81191	0
IL16	ENSG00000172349	-0.165306	-1.80962	0
SASH1	ENSG00000111961	-0.164858	-1.80277	0
GGA2	ENSG00000103365	-0.164743	-1.80101	0
MYH9	ENSG00000100345	-0.164635	-1.79935	0
ABR	ENSG00000159842	-0.164445	-1.79645	0
ARHGAP4	ENSG00000089820	-0.164383	-1.79549	0
UBN1	ENSG00000118900	-0.16426	-1.79361	0
PLEKHO2	ENSG00000241839	-0.164217	-1.79295	0
DYNC1H1	ENSG00000197102	-0.164179	-1.79238	0
CMKLR1	ENSG00000174600	-0.163867	-1.7876	0
MLEC	ENSG00000110917	-0.163835	-1.78712	0
IQGAP2	ENSG00000145703	-0.163525	-1.78237	0
PLXNA1	ENSG00000114554	-0.163422	-1.78079	0
SLC2A5	ENSG00000142583	-0.163382	-1.78017	0
SPEN	ENSG00000065526	-0.163233	-1.7779	0
AFF1	ENSG00000172493	-0.163123	-1.77622	0
ZKSCAN1	ENSG00000106261	-0.162974	-1.77393	0
HLA-F	ENSG00000204642	-0.162819	-1.77156	1
LARP1	ENSG00000155506	-0.162796	-1.77121	0
FAM129A	ENSG00000135842	-0.162795	-1.77119	0
AP1S2	ENSG00000182287	-0.162749	-1.7705	0
TM9SF3	ENSG00000077147	-0.162698	-1.7697	0
TFEB	ENSG00000112561	-0.162665	-1.76921	0
TFRC	ENSG00000072274	-0.162518	-1.76696	1
KLHL24	ENSG00000114796	-0.162171	-1.76165	0
AQP9	ENSG00000103569	-0.162067	-1.76005	0
ZFYVE26	ENSG00000072121	-0.162053	-1.75984	0
CANX	ENSG00000127022	-0.161866	-1.75697	0
COL4A3BP	ENSG00000113163	-0.161827	-1.75639	0
ARHGAP30	ENSG00000186517	-0.161755	-1.75528	0
SGTB	ENSG00000197860	-0.161644	-1.75359	0
MBOAT7	ENSG00000125505	-0.161305	-1.74839	0
NPC1	ENSG00000141458	-0.16118	-1.74648	0
CLIP1	ENSG00000130779	-0.161075	-1.74488	0
CD9	ENSG00000010278	-0.160928	-1.74262	1
WIPF1	ENSG00000115935	-0.160694	-1.73904	0
BST1	ENSG00000109743	-0.160612	-1.73779	1
ITGAX	ENSG00000140678	-0.1605	-1.73607	1
TLR4	ENSG00000136869	-0.160464	-1.73552	1
IL10RA	ENSG00000110324	-0.160117	-1.7302	1
ADAM8	ENSG00000151651	-0.159952	-1.72768	1
PLBD1	ENSG00000121316	-0.159889	-1.72673	0
NAPRT1	ENSG00000147813	-0.159627	-1.72272	0
TNS3	ENSG00000136205	-0.159362	-1.71866	0
SAMD9L	ENSG00000177409	-0.159048	-1.71385	0
TRIM38	ENSG00000112343	-0.158826	-1.71045	0
IFNAR2	ENSG00000159110	-0.158462	-1.70488	0
TGM2	ENSG00000198959	-0.158446	-1.70464	0
RAB7L1	ENSG00000117280	-0.158349	-1.70315	0
FAM214B	ENSG00000005238	-0.158345	-1.70309	0
ANXA6	ENSG00000197043	-0.158264	-1.70185	0
KPNB1	ENSG00000108424	-0.158139	-1.69993	0
EMILIN2	ENSG00000132205	-0.157864	-1.69573	0
PRPF38B	ENSG00000134186	-0.157628	-1.69212	0
GALM	ENSG00000143891	-0.157581	-1.6914	0
KIF13B	ENSG00000197892	-0.15735	-1.68787	0
PLEKHM2	ENSG00000116786	-0.157296	-1.68704	0
LRRC25	ENSG00000175489	-0.157233	-1.68607	0
FCGR2A	ENSG00000143226	-0.15689	-1.68082	0
DYSF	ENSG00000135636	-0.156638	-1.67697	0
EHBP1L1	ENSG00000173442	-0.156492	-1.67473	0
MX2	ENSG00000183486	-0.156385	-1.6731	0
LPCAT1	ENSG00000153395	-0.156327	-1.6722	0
IFI6	ENSG00000126709	-0.156162	-1.66969	0
NUCKS1	ENSG00000069275	-0.156136	-1.66929	0
MAPK1	ENSG00000100030	-0.156105	-1.66881	0
EIF4G3	ENSG00000075151	-0.155994	-1.6671	0
TLR6	ENSG00000174130	-0.155949	-1.66642	1
CBL	ENSG00000110395	-0.155873	-1.66527	0
CELF2	ENSG00000048740	-0.155798	-1.66411	0
ACSL1	ENSG00000151726	-0.155744	-1.66328	0
SAMHD1	ENSG00000101347	-0.155734	-1.66313	0
SPATA13	ENSG00000182957	-0.15562	-1.66139	0
TNS1	ENSG00000079308	-0.155594	-1.661	0
RAP2B	ENSG00000181467	-0.155588	-1.6609	0
TSPAN14	ENSG00000108219	-0.15534	-1.65711	0
SMG1	ENSG00000157106	-0.155245	-1.65566	0
GNB4	ENSG00000114450	-0.155203	-1.655	0
TRIM14	ENSG00000106785	-0.154832	-1.64932	0
OS9	ENSG00000135506	-0.154643	-1.64643	0
GSPT1	ENSG00000103342	-0.154621	-1.64609	0
PAK2	ENSG00000180370	-0.154483	-1.64398	0
IFIT2	ENSG00000119922	-0.154479	-1.64393	0
DHRS3	ENSG00000162496	-0.154115	-1.63836	0
LILRA3	ENSG00000170866	-0.153936	-1.63561	0
RBM33	ENSG00000184863	-0.153733	-1.63252	0
HSPA5	ENSG00000044574	-0.153492	-1.62882	0
EIF4G1	ENSG00000114867	-0.153367	-1.6269	0
F11R	ENSG00000158769	-0.153282	-1.62561	1
NUPL1	ENSG00000139496	-0.153188	-1.62416	0
VPS13C	ENSG00000129003	-0.152506	-1.61373	0
CD59	ENSG00000085063	-0.152493	-1.61353	1
NDUFS7	ENSG00000115286	-0.152486	-1.61342	0
CDK5RAP3	ENSG00000108465	-0.15242	-1.61242	0
LILRB3	ENSG00000204577	-0.152101	-1.60753	1
HUWE1	ENSG00000086758	-0.15207	-1.60706	0
M6PR	ENSG00000003056	-0.151989	-1.60582	0
HAVCR2	ENSG00000135077	-0.151918	-1.60472	1
GTF2I	ENSG00000077809	-0.151896	-1.60439	0
NGRN	ENSG00000182768	-0.151482	-1.59806	0
ACTN1	ENSG00000072110	-0.15143	-1.59727	0
UGCG	ENSG00000148154	-0.151234	-1.59427	0
APOBR	ENSG00000184730	-0.151178	-1.5934	0
CST3	ENSG00000101439	-0.151015	-1.59092	0
MAP4K4	ENSG00000071054	-0.150944	-1.58983	0
PLIN3	ENSG00000105355	-0.150858	-1.58852	0
NCOA4	ENSG00000138293	-0.150828	-1.58805	0
SYK	ENSG00000165025	-0.150638	-1.58514	0
ILF3	ENSG00000129351	-0.150623	-1.58491	0
FAM63B	ENSG00000128923	-0.150614	-1.58478	0
CIITA	ENSG00000179583	-0.150426	-1.58189	0
IFI16	ENSG00000163565	-0.15041	-1.58166	0
TRIM56	ENSG00000169871	-0.150408	-1.58162	0
IP6K1	ENSG00000176095	-0.15039	-1.58134	0
DTX3L	ENSG00000163840	-0.150363	-1.58094	0
ACIN1	ENSG00000100813	-0.15004	-1.57598	0
FMNL1	ENSG00000184922	-0.149534	-1.56825	0
ATP13A2	ENSG00000159363	-0.149355	-1.56551	0
CHST15	ENSG00000182022	-0.149295	-1.56459	0
PARP1	ENSG00000143799	-0.149061	-1.56101	0
RAB5A	ENSG00000144566	-0.148903	-1.55859	0
SMARCA5	ENSG00000153147	-0.148853	-1.55782	0
EFHD2	ENSG00000142634	-0.148757	-1.55636	0
CAB39	ENSG00000135932	-0.14867	-1.55502	0
CCL2	ENSG00000108691	-0.148453	-1.5517	0
NOTCH2NL	ENSG00000213240	-0.148318	-1.54964	0
PRKCB	ENSG00000166501	-0.148279	-1.54903	0
OSCAR	ENSG00000170909	-0.148133	-1.54681	0
ARHGEF11	ENSG00000132694	-0.148119	-1.54659	0
PUM1	ENSG00000134644	-0.148116	-1.54654	0
RP11-458D21.5	ENSG00000255168	-0.148091	-1.54617	0
CD82	ENSG00000085117	-0.148073	-1.54588	1
EPSTI1	ENSG00000133106	-0.147901	-1.54326	0
MYCBP2	ENSG00000005810	-0.147862	-1.54266	0
ARHGAP26	ENSG00000145819	-0.147795	-1.54163	0
UBXN4	ENSG00000144224	-0.147474	-1.53672	0
BCL11A	ENSG00000119866	-0.147455	-1.53642	0
JAK1	ENSG00000162434	-0.147338	-1.53463	0
PTPN1	ENSG00000196396	-0.147337	-1.53462	0
AKAP13	ENSG00000170776	-0.147132	-1.53149	0
SECTM1	ENSG00000141574	-0.147013	-1.52966	0
TMBIM1	ENSG00000135926	-0.146622	-1.52369	0
TMEM106A	ENSG00000184988	-0.14655	-1.52258	0
STIP1	ENSG00000168439	-0.14641	-1.52044	0
ITPR2	ENSG00000123104	-0.146352	-1.51954	0
SLC35F6	ENSG00000213699	-0.146297	-1.5187	0
SRSF11	ENSG00000116754	-0.146275	-1.51837	0
NDRG1	ENSG00000104419	-0.146264	-1.5182	0
STK10	ENSG00000072786	-0.146242	-1.51786	0
KMT2A	ENSG00000118058	-0.146036	-1.5147	0
SNCA	ENSG00000145335	-0.145878	-1.5123	0
IL4R	ENSG00000077238	-0.145826	-1.5115	1
PRKAR2A	ENSG00000114302	-0.145537	-1.50708	0
AGO1	ENSG00000092847	-0.145466	-1.50599	0
TTL	ENSG00000114999	-0.14528	-1.50314	0
PIK3AP1	ENSG00000155629	-0.145077	-1.50004	0
ABCF1	ENSG00000204574	-0.144952	-1.49812	0
BMPR2	ENSG00000204217	-0.144928	-1.49775	0
CDS2	ENSG00000101290	-0.144832	-1.49629	0
ACAP2	ENSG00000114331	-0.144725	-1.49465	0
OPTN	ENSG00000123240	-0.144688	-1.49407	0
ATP13A1	ENSG00000105726	-0.14459	-1.49258	0
CORO1A	ENSG00000102879	-0.144543	-1.49187	0
DDX17	ENSG00000100201	-0.144275	-1.48776	0
LSR	ENSG00000105699	-0.144014	-1.48377	0
DMXL2	ENSG00000104093	-0.143976	-1.48319	0
GPX3	ENSG00000211445	-0.143966	-1.48303	0
TMEM140	ENSG00000146859	-0.143954	-1.48285	0
PTPN11	ENSG00000179295	-0.143815	-1.48072	0
NUMA1	ENSG00000137497	-0.14349	-1.47575	0
ARFGEF2	ENSG00000124198	-0.143462	-1.47531	0
PRR14L	ENSG00000183530	-0.143456	-1.47523	0
HSPA1A	ENSG00000204389	-0.143403	-1.47441	0
TPRA1	ENSG00000163870	-0.143177	-1.47096	0
PCM1	ENSG00000078674	-0.142882	-1.46644	0
EP300	ENSG00000100393	-0.142867	-1.46622	0
MICAL1	ENSG00000135596	-0.14269	-1.46351	0
TACC1	ENSG00000147526	-0.142687	-1.46346	0
EMP1	ENSG00000134531	-0.142456	-1.45993	0
BATF	ENSG00000156127	-0.142449	-1.45981	0
MAP3K11	ENSG00000173327	-0.142398	-1.45904	0
NUP62	ENSG00000213024	-0.14238	-1.45876	0
DENND4C	ENSG00000137145	-0.142338	-1.45812	0
SP1	ENSG00000185591	-0.142183	-1.45574	0
B3GNT2	ENSG00000170340	-0.142131	-1.45495	0
AOAH	ENSG00000136250	-0.141891	-1.45128	0
KDSR	ENSG00000119537	-0.14182	-1.45019	0
CTTNBP2NL	ENSG00000143079	-0.14155	-1.44605	0
IL1R1	ENSG00000115594	-0.141481	-1.445	1
SIRPB1	ENSG00000101307	-0.141158	-1.44006	1
HECTD4	ENSG00000173064	-0.141013	-1.43785	0
CLTC	ENSG00000141367	-0.140771	-1.43414	0
CR1	ENSG00000203710	-0.140621	-1.43184	1
METTL7A	ENSG00000185432	-0.140567	-1.43102	0
NRD1	ENSG00000078618	-0.140456	-1.42932	0
EML4	ENSG00000143924	-0.140438	-1.42904	0
ENOSF1	ENSG00000132199	-0.14037	-1.42799	0
KLHDC8B	ENSG00000185909	-0.14033	-1.42738	0
BAZ1B	ENSG00000009954	-0.140182	-1.42511	0
OGFRL1	ENSG00000119900	-0.139947	-1.42152	0
DFNA5	ENSG00000105928	-0.139881	-1.42051	0
TXLNA	ENSG00000084652	-0.139292	-1.4115	0
ARHGAP21	ENSG00000107863	-0.139273	-1.41121	0
SCD	ENSG00000099194	-0.13922	-1.41039	0
CMTM6	ENSG00000091317	-0.139105	-1.40864	0
GLG1	ENSG00000090863	-0.139044	-1.40771	0
GRAMD4	ENSG00000075240	-0.138964	-1.40649	0
MTPN	ENSG00000105887	-0.138706	-1.40253	0
KMT2C	ENSG00000055609	-0.138541	-1.40001	0
RP11-77K12.1	ENSG00000261717	-0.138521	-1.3997	0
CAMK1D	ENSG00000183049	-0.138512	-1.39956	0
ZNF438	ENSG00000183621	-0.138502	-1.39942	0
LGMN	ENSG00000100600	-0.138416	-1.39809	0
SMAD5	ENSG00000113658	-0.13827	-1.39586	0
ZFYVE16	ENSG00000039319	-0.13821	-1.39494	0
ATP6V0A1	ENSG00000033627	-0.138078	-1.39292	0
CEP350	ENSG00000135837	-0.137989	-1.39155	0
NOP14	ENSG00000087269	-0.137941	-1.39082	0
OSBPL8	ENSG00000091039	-0.137937	-1.39076	0
GOLIM4	ENSG00000173905	-0.13792	-1.3905	0
NSD1	ENSG00000165671	-0.137843	-1.38933	0
SLC11A1	ENSG00000018280	-0.137804	-1.38873	0
ITGAM	ENSG00000169896	-0.137564	-1.38505	1
TCF20	ENSG00000100207	-0.137483	-1.38381	0
EPAS1	ENSG00000116016	-0.137438	-1.38313	0
ZNF267	ENSG00000185947	-0.137318	-1.38128	0
VPS53	ENSG00000141252	-0.137208	-1.3796	0
MACF1	ENSG00000127603	-0.137106	-1.37804	0
MAP3K2	ENSG00000169967	-0.137025	-1.37681	0
PHACTR4	ENSG00000204138	-0.136761	-1.37277	0
FXR1	ENSG00000114416	-0.13662	-1.37061	0
ZMIZ1	ENSG00000108175	-0.136471	-1.36833	0
GAB2	ENSG00000033327	-0.136465	-1.36824	0
HTRA4	ENSG00000169495	-0.136463	-1.3682	0
NCOA2	ENSG00000140396	-0.13645	-1.368	0
RSAD2	ENSG00000134321	-0.136322	-1.36604	0
SGK3	ENSG00000104205	-0.136321	-1.36604	0
REEP4	ENSG00000168476	-0.136164	-1.36363	0
WDR82	ENSG00000164091	-0.136142	-1.36328	0
WDR37	ENSG00000047056	-0.136048	-1.36186	0
WASF2	ENSG00000158195	-0.136047	-1.36183	0
TOM1L2	ENSG00000175662	-0.135911	-1.35976	0
USP34	ENSG00000115464	-0.135816	-1.3583	0
RAB2A	ENSG00000104388	-0.135692	-1.3564	0
TERF2IP	ENSG00000166848	-0.13569	-1.35638	0
FCHO2	ENSG00000157107	-0.135628	-1.35542	0
NIN	ENSG00000100503	-0.135589	-1.35482	0
XIAP	ENSG00000101966	-0.1355	-1.35346	0
BST2	ENSG00000130303	-0.135428	-1.35236	1
CCR5	ENSG00000160791	-0.13532	-1.35071	1
PLCB2	ENSG00000137841	-0.135319	-1.35069	0
ITCH	ENSG00000078747	-0.135299	-1.35039	0
LEP	ENSG00000174697	-0.135192	-1.34875	0
USP22	ENSG00000124422	-0.135054	-1.34664	0
APEH	ENSG00000164062	-0.135022	-1.34615	0
CLMN	ENSG00000165959	-0.134802	-1.34279	0
ANKLE2	ENSG00000176915	-0.134689	-1.34105	0
TRPM2	ENSG00000142185	-0.134654	-1.34052	0
SIL1	ENSG00000120725	-0.134651	-1.34047	0
AMICA1	ENSG00000160593	-0.134635	-1.34022	0
PLA2G16	ENSG00000176485	-0.134622	-1.34002	0
CORO7	ENSG00000262246	-0.134523	-1.33852	0
FAM46A	ENSG00000112773	-0.134473	-1.33775	0
BANP	ENSG00000172530	-0.134121	-1.33237	0
IST1	ENSG00000182149	-0.134066	-1.33152	0
TOR1B	ENSG00000136816	-0.13406	-1.33143	0
UTP18	ENSG00000011260	-0.133746	-1.32663	0
ARRB2	ENSG00000141480	-0.13343	-1.32179	0
PHACTR1	ENSG00000112137	-0.133408	-1.32145	0
WNK1	ENSG00000060237	-0.133387	-1.32112	0
RPN1	ENSG00000163902	-0.133264	-1.31925	0
HLA-DRB5	ENSG00000198502	-0.133241	-1.3189	1
NAP1L4	ENSG00000205531	-0.133123	-1.31709	0
REST	ENSG00000084093	-0.133092	-1.31662	0
ACP2	ENSG00000134575	-0.132995	-1.31513	0
KCNAB2	ENSG00000069424	-0.132975	-1.31483	0
MS4A7	ENSG00000166927	-0.13283	-1.3126	0
PLEKHB2	ENSG00000115762	-0.132819	-1.31244	0
THEMIS2	ENSG00000130775	-0.132802	-1.31217	0
CXorf38	ENSG00000185753	-0.132769	-1.31167	0
CCDC149	ENSG00000181982	-0.13251	-1.30771	0
EPG5	ENSG00000152223	-0.132497	-1.30751	0
PPM1K	ENSG00000163644	-0.132465	-1.30702	0
SREK1	ENSG00000153914	-0.132405	-1.3061	0
C20orf194	ENSG00000088854	-0.132383	-1.30576	0
DSP	ENSG00000096696	-0.132261	-1.3039	0
TAOK3	ENSG00000135090	-0.132246	-1.30366	0
SLFN11	ENSG00000172716	-0.132126	-1.30182	0
SIDT2	ENSG00000149577	-0.132078	-1.30109	0
TBRG1	ENSG00000154144	-0.132052	-1.30069	0
SEMA6B	ENSG00000167680	-0.131951	-1.29915	0
MLLT6	ENSG00000108292	-0.131836	-1.29739	0
FCGRT	ENSG00000104870	-0.131777	-1.29648	0
RTN4	ENSG00000115310	-0.131687	-1.29511	0
GPR137B	ENSG00000077585	-0.131544	-1.29293	0
ITGAL	ENSG00000005844	-0.131366	-1.2902	1
MYADM	ENSG00000179820	-0.131314	-1.28941	0
SLC44A2	ENSG00000129353	-0.131177	-1.28731	0
DOPEY2	ENSG00000142197	-0.131128	-1.28656	0
WSB1	ENSG00000109046	-0.131053	-1.2854	0
DAPK1	ENSG00000196730	-0.131026	-1.285	0
LTBR	ENSG00000111321	-0.130965	-1.28405	0
XAF1	ENSG00000132530	-0.130953	-1.28388	0
LAMP1	ENSG00000185896	-0.130879	-1.28274	1
RAB8A	ENSG00000167461	-0.130865	-1.28253	0
ARHGAP31	ENSG00000031081	-0.13084	-1.28215	0
TMC6	ENSG00000141524	-0.130726	-1.2804	0
NAGLU	ENSG00000108784	-0.130713	-1.28021	0
GAS2L3	ENSG00000139354	-0.130622	-1.27881	0
PRDM2	ENSG00000116731	-0.130483	-1.27669	0
UAP1L1	ENSG00000197355	-0.130394	-1.27532	0
ACSL5	ENSG00000197142	-0.130354	-1.27471	0
MMP14	ENSG00000157227	-0.130319	-1.27418	0
SMARCA2	ENSG00000080503	-0.130299	-1.27386	0
MCTP1	ENSG00000175471	-0.130277	-1.27352	0
NCOA3	ENSG00000124151	-0.130256	-1.27322	0
TMED8	ENSG00000100580	-0.130199	-1.27233	0
ETF1	ENSG00000120705	-0.130192	-1.27222	0
RNASET2	ENSG00000026297	-0.130136	-1.27138	0
TOP1	ENSG00000198900	-0.130118	-1.27109	0
MESDC2	ENSG00000117899	-0.130013	-1.2695	0
NAMPTL	ENSG00000229644	-0.129918	-1.26804	0
KIAA2018	ENSG00000176542	-0.129878	-1.26743	0
UFL1	ENSG00000014123	-0.129702	-1.26474	0
SETD5	ENSG00000168137	-0.129693	-1.26459	0
LINC00657	ENSG00000260032	-0.129585	-1.26294	0
ASAP1	ENSG00000153317	-0.129548	-1.26237	0
EEPD1	ENSG00000122547	-0.129512	-1.26182	0
ADCY3	ENSG00000138031	-0.129351	-1.25937	0
GOLGA2	ENSG00000167110	-0.129321	-1.2589	0
LILRB5	ENSG00000105609	-0.129292	-1.25845	1
CHMP2B	ENSG00000083937	-0.129192	-1.25693	0
PAFAH1B2	ENSG00000168092	-0.129192	-1.25692	0
RP11-134L10.1	ENSG00000272941	-0.129048	-1.25472	0
COL8A2	ENSG00000171812	-0.128956	-1.25332	0
CXCR4	ENSG00000121966	-0.128878	-1.25212	1
FMN1	ENSG00000248905	-0.128829	-1.25137	0
SON	ENSG00000159140	-0.1288	-1.25093	0
TPD52L2	ENSG00000101150	-0.128668	-1.24891	0
CMTM3	ENSG00000140931	-0.12847	-1.24588	0
LPCAT2	ENSG00000087253	-0.128453	-1.24562	0
RAP1A	ENSG00000116473	-0.1284	-1.24481	0
SGMS1	ENSG00000198964	-0.128387	-1.24461	0
STK4	ENSG00000101109	-0.128362	-1.24422	0
CSF1R	ENSG00000182578	-0.128189	-1.24157	1
YTHDC1	ENSG00000083896	-0.128158	-1.24111	0
XPC	ENSG00000154767	-0.128155	-1.24105	0
BRD4	ENSG00000141867	-0.127928	-1.23759	0
RBL2	ENSG00000103479	-0.127781	-1.23534	0
HINT3	ENSG00000111911	-0.127777	-1.23528	0
NBEAL2	ENSG00000160796	-0.127769	-1.23515	0
VSIG4	ENSG00000155659	-0.127722	-1.23443	0
RBM47	ENSG00000163694	-0.127721	-1.23441	0
FUOM	ENSG00000148803	-0.12771	-1.23425	0
TPP1	ENSG00000166340	-0.127667	-1.23359	0
AZIN1	ENSG00000155096	-0.127627	-1.23297	0
CDC42EP3	ENSG00000163171	-0.127534	-1.23155	0
NIPBL	ENSG00000164190	-0.12751	-1.23118	0
ARID5A	ENSG00000196843	-0.127476	-1.23067	0
IL17RA	ENSG00000177663	-0.127415	-1.22973	0
TNPO3	ENSG00000064419	-0.12737	-1.22904	0
ZFP36L2	ENSG00000152518	-0.127362	-1.22891	0
SNX1	ENSG00000028528	-0.12735	-1.22874	0
ELMSAN1	ENSG00000156030	-0.127326	-1.22836	0
CORO1C	ENSG00000110880	-0.127315	-1.2282	0
KIAA0319L	ENSG00000142687	-0.127286	-1.22775	0
RP11-598F7.3	ENSG00000256948	-0.127231	-1.22692	0
FAM178A	ENSG00000119906	-0.127219	-1.22673	0
HLA-DMA	ENSG00000204257	-0.127181	-1.22615	1
CHD2	ENSG00000173575	-0.127117	-1.22517	0
FTSJ3	ENSG00000108592	-0.127028	-1.2238	0
HOOK3	ENSG00000168172	-0.126967	-1.22287	0
NFAM1	ENSG00000235568	-0.126958	-1.22274	0
PATL1	ENSG00000166889	-0.126958	-1.22273	0
MRAS	ENSG00000158186	-0.126935	-1.22239	0
IQSEC1	ENSG00000144711	-0.126844	-1.221	0
SERPING1	ENSG00000149131	-0.12678	-1.22002	0
PRPF6	ENSG00000101161	-0.126741	-1.21942	0
DOCK8	ENSG00000107099	-0.1267	-1.21879	0
RRAGD	ENSG00000025039	-0.1267	-1.21879	0
LAT2	ENSG00000086730	-0.126605	-1.21734	0
ANO6	ENSG00000177119	-0.126577	-1.21691	0
CAMSAP1	ENSG00000130559	-0.126576	-1.21689	0
PKD2L1	ENSG00000107593	-0.126502	-1.21576	0
CNPY3	ENSG00000137161	-0.126366	-1.21368	0
XRN1	ENSG00000114127	-0.126341	-1.21329	0
CHD6	ENSG00000124177	-0.12623	-1.21159	0
ZC3H18	ENSG00000158545	-0.126197	-1.21109	0
CMPK2	ENSG00000134326	-0.126131	-1.21008	0
ADAR	ENSG00000160710	-0.126113	-1.2098	0
RANBP3	ENSG00000031823	-0.126071	-1.20917	0
ZFX	ENSG00000005889	-0.126064	-1.20906	0
RNF20	ENSG00000155827	-0.126019	-1.20837	0
AKIRIN2	ENSG00000135334	-0.12597	-1.20762	0
PIEZO1	ENSG00000103335	-0.125923	-1.2069	0
BCAT1	ENSG00000060982	-0.125888	-1.20637	0
SCAF11	ENSG00000139218	-0.12584	-1.20562	0
SLC22A18	ENSG00000110628	-0.125813	-1.20522	0
AP1B1	ENSG00000100280	-0.125809	-1.20515	0
USP36	ENSG00000055483	-0.125751	-1.20426	0
EZR	ENSG00000092820	-0.125603	-1.202	0
NRIP3	ENSG00000175352	-0.125552	-1.20121	0
PEAK1	ENSG00000173517	-0.125475	-1.20004	0
SCAF4	ENSG00000156304	-0.125471	-1.19999	0
GLTSCR2	ENSG00000105373	-0.125359	-1.19826	0
ABCA1	ENSG00000165029	-0.12534	-1.19798	0
PCNT	ENSG00000160299	-0.125322	-1.1977	0
LBR	ENSG00000143815	-0.125321	-1.19769	0
FKBP4	ENSG00000004478	-0.125287	-1.19716	0
LAMP2	ENSG00000005893	-0.125193	-1.19572	1
ABI3	ENSG00000108798	-0.125181	-1.19554	0
SLC17A5	ENSG00000119899	-0.125143	-1.19496	0
LARP4B	ENSG00000107929	-0.125044	-1.19345	0
ATP2B1	ENSG00000070961	-0.125019	-1.19306	0
FAM65A	ENSG00000039523	-0.124947	-1.19196	0
ZZEF1	ENSG00000074755	-0.124901	-1.19126	0
VHL	ENSG00000134086	-0.124875	-1.19086	0
IRF7	ENSG00000185507	-0.124779	-1.18939	0
NFKB1	ENSG00000109320	-0.124597	-1.1866	0
RP11-802E16.3	ENSG00000255031	-0.124537	-1.18568	0
NBPF1	ENSG00000219481	-0.124524	-1.18548	0
PMPCA	ENSG00000165688	-0.124467	-1.18461	0
MYD88	ENSG00000172936	-0.124415	-1.18382	0
KLF13	ENSG00000169926	-0.124282	-1.18178	0
MUL1	ENSG00000090432	-0.124274	-1.18166	0
EFR3A	ENSG00000132294	-0.124083	-1.17874	0
IDUA	ENSG00000127415	-0.124053	-1.17829	0
ARSD	ENSG00000006756	-0.123978	-1.17713	0
GNS	ENSG00000135677	-0.123892	-1.17582	0
SUN2	ENSG00000100242	-0.123876	-1.17558	0
SBNO2	ENSG00000064932	-0.123867	-1.17543	0
MTHFR	ENSG00000177000	-0.123834	-1.17493	0
ICOSLG	ENSG00000160223	-0.123834	-1.17493	1
SRRM1	ENSG00000133226	-0.123767	-1.1739	0
CLK2	ENSG00000176444	-0.123695	-1.17279	0
ZC3H13	ENSG00000123200	-0.123669	-1.17241	0
SUPT6H	ENSG00000109111	-0.123651	-1.17213	0
AGRN	ENSG00000188157	-0.123601	-1.17136	0
TBC1D14	ENSG00000132405	-0.12355	-1.17058	0
MOB1A	ENSG00000114978	-0.123456	-1.16914	0
SGSH	ENSG00000181523	-0.123393	-1.16818	0
STEAP3	ENSG00000115107	-0.123373	-1.16788	0
GNG7	ENSG00000176533	-0.123231	-1.16569	0
ARHGEF10L	ENSG00000074964	-0.123172	-1.1648	0
BRD2	ENSG00000204256	-0.123125	-1.16408	0
CENPBD1	ENSG00000177946	-0.123108	-1.16381	0
RSRC2	ENSG00000111011	-0.123035	-1.1627	0
NCL	ENSG00000115053	-0.123032	-1.16265	0
DEK	ENSG00000124795	-0.122992	-1.16203	0
CREBL2	ENSG00000111269	-0.122979	-1.16185	0
CAPRIN1	ENSG00000135387	-0.122955	-1.16148	0
MAN2B2	ENSG00000013288	-0.122948	-1.16137	0
GPCPD1	ENSG00000125772	-0.122943	-1.16129	0
RCC2	ENSG00000179051	-0.122932	-1.16112	0
RGS12	ENSG00000159788	-0.122889	-1.16046	0
TPM4	ENSG00000167460	-0.122887	-1.16043	0
MYO1F	ENSG00000142347	-0.122805	-1.15918	0
ATF6	ENSG00000118217	-0.122794	-1.15901	0
WAPAL	ENSG00000062650	-0.122474	-1.15411	0
RAB20	ENSG00000139832	-0.122416	-1.15322	0
AKAP2	ENSG00000241978	-0.122409	-1.15312	0
FUCA1	ENSG00000179163	-0.122302	-1.15148	0
UGGT1	ENSG00000136731	-0.122205	-1.15	0
KIF1B	ENSG00000054523	-0.122117	-1.14865	0
APBB1IP	ENSG00000077420	-0.12205	-1.14762	0
INO80	ENSG00000128908	-0.122033	-1.14737	0
MGAT4A	ENSG00000071073	-0.121826	-1.1442	0
HTT	ENSG00000197386	-0.121811	-1.14396	0
ARPC5	ENSG00000162704	-0.121798	-1.14376	0
DESI2	ENSG00000121644	-0.121665	-1.14173	0
CMIP	ENSG00000153815	-0.121589	-1.14057	0
DNMT1	ENSG00000130816	-0.121575	-1.14035	0
SYNRG	ENSG00000006114	-0.121541	-1.13983	0
DDHD1	ENSG00000100523	-0.121465	-1.13867	0
STAU1	ENSG00000124214	-0.121376	-1.13731	0
HPS5	ENSG00000110756	-0.121356	-1.13701	0
SIGLEC1	ENSG00000088827	-0.121284	-1.1359	0
BLVRA	ENSG00000106605	-0.121239	-1.13522	0
LACTB	ENSG00000103642	-0.121076	-1.13272	0
DOCK4	ENSG00000128512	-0.120955	-1.13086	0
FAM193A	ENSG00000125386	-0.120952	-1.13083	0
LEPROTL1	ENSG00000104660	-0.120918	-1.13031	0
PTGER2	ENSG00000125384	-0.120913	-1.13022	0
STX7	ENSG00000079950	-0.120887	-1.12982	0
WDFY4	ENSG00000128815	-0.120795	-1.12842	0
FNDC3B	ENSG00000075420	-0.120683	-1.1267	0
FEZ2	ENSG00000171055	-0.120643	-1.12609	0
SUDS3	ENSG00000111707	-0.120642	-1.12608	0
IK	ENSG00000113141	-0.120639	-1.12603	0
SLC37A2	ENSG00000134955	-0.120377	-1.12202	0
SRPK2	ENSG00000135250	-0.12031	-1.121	0
CLASP2	ENSG00000163539	-0.120221	-1.11964	0
TMCO3	ENSG00000150403	-0.120218	-1.11958	0
KAT6A	ENSG00000083168	-0.120199	-1.11929	0
NFIC	ENSG00000141905	-0.120189	-1.11915	0
DNAJA4	ENSG00000140403	-0.120116	-1.11802	0
HOMEZ	ENSG00000215271	-0.120076	-1.11742	0
ACLY	ENSG00000131473	-0.120045	-1.11694	0
DHX36	ENSG00000174953	-0.119957	-1.11559	0
ZBTB43	ENSG00000169155	-0.119928	-1.11515	0
NRP2	ENSG00000118257	-0.119883	-1.11445	0
HK1	ENSG00000156515	-0.119823	-1.11354	0
MED13L	ENSG00000123066	-0.119799	-1.11317	0
AGPAT3	ENSG00000160216	-0.119784	-1.11295	0
CDK12	ENSG00000167258	-0.119781	-1.11291	0
BMP2K	ENSG00000138756	-0.119746	-1.11236	0
GDI2	ENSG00000057608	-0.119624	-1.11049	0
RABEP1	ENSG00000029725	-0.119596	-1.11007	0
EIF4E2	ENSG00000135930	-0.11957	-1.10967	0
PLOD1	ENSG00000083444	-0.119561	-1.10953	0
EWSR1	ENSG00000182944	-0.11953	-1.10906	0
CERK	ENSG00000100422	-0.11943	-1.10753	0
APOBEC3C	ENSG00000244509	-0.119409	-1.1072	0
PDIA3	ENSG00000167004	-0.119318	-1.10582	0
AFF4	ENSG00000072364	-0.119176	-1.10364	0
RIN3	ENSG00000100599	-0.11911	-1.10263	0
EMC10	ENSG00000161671	-0.119095	-1.1024	0
TMEM30A	ENSG00000112697	-0.119025	-1.10134	0
MIA3	ENSG00000154305	-0.118969	-1.10047	0
PHF20L1	ENSG00000129292	-0.118904	-1.09948	0
CCDC97	ENSG00000142039	-0.11885	-1.09865	0
KCNE3	ENSG00000175538	-0.118846	-1.09859	0
HSP90AA1	ENSG00000080824	-0.118801	-1.0979	0
POU2F1	ENSG00000143190	-0.118767	-1.09739	0
CERS4	ENSG00000090661	-0.118701	-1.09638	0
PLTP	ENSG00000100979	-0.118675	-1.09597	0
RASSF2	ENSG00000101265	-0.118665	-1.09583	0
SORT1	ENSG00000134243	-0.11856	-1.09421	0
ZBTB38	ENSG00000177311	-0.118504	-1.09336	0
CNPPD1	ENSG00000115649	-0.118482	-1.09302	0
WHSC1	ENSG00000109685	-0.118466	-1.09278	0
ARAP1	ENSG00000186635	-0.118459	-1.09267	0
ARRB1	ENSG00000137486	-0.118382	-1.09149	0
SGSM3	ENSG00000100359	-0.118376	-1.0914	0
ZFAND5	ENSG00000107372	-0.118328	-1.09067	0
RP11-96O20.4	ENSG00000260170	-0.118325	-1.09062	0
GHDC	ENSG00000167925	-0.118317	-1.09049	0
PDXK	ENSG00000160209	-0.118202	-1.08874	0
C21orf33	ENSG00000160221	-0.118177	-1.08835	0
PAK1	ENSG00000149269	-0.118131	-1.08765	0
CLK3	ENSG00000179335	-0.118001	-1.08565	0
TNFSF12	ENSG00000239697	-0.117895	-1.08403	0
GFPT1	ENSG00000198380	-0.117859	-1.08349	0
SOAT1	ENSG00000057252	-0.117839	-1.08317	0
ADAP2	ENSG00000184060	-0.117829	-1.08302	0
PCYT1A	ENSG00000161217	-0.117824	-1.08294	0
SLC7A7	ENSG00000155465	-0.117788	-1.0824	0
SPPL2A	ENSG00000138600	-0.117459	-1.07736	0
LAMB2	ENSG00000172037	-0.11744	-1.07708	0
DNAJA1	ENSG00000086061	-0.117376	-1.0761	0
ADCY7	ENSG00000121281	-0.117282	-1.07466	0
DNAJB6	ENSG00000105993	-0.117282	-1.07465	0
RP11-145M9.4	ENSG00000269728	-0.117231	-1.07387	0
DST	ENSG00000151914	-0.117212	-1.07358	0
LSM14A	ENSG00000257103	-0.117192	-1.07327	0
SBF1	ENSG00000100241	-0.117168	-1.07291	0
SAFB2	ENSG00000130254	-0.117166	-1.07287	0
HIPK3	ENSG00000110422	-0.117132	-1.07236	0
RP11-73M18.2	ENSG00000256500	-0.117127	-1.07229	0
THUMPD1	ENSG00000066654	-0.117095	-1.0718	0
TNIP3	ENSG00000050730	-0.117089	-1.07171	0
CLPTM1	ENSG00000104853	-0.117088	-1.07168	0
LSM14B	ENSG00000149657	-0.117068	-1.07138	0
SMARCC2	ENSG00000139613	-0.117012	-1.07052	0
GRK6	ENSG00000198055	-0.116984	-1.0701	0
PPFIBP2	ENSG00000166387	-0.11693	-1.06927	0
EXOSC10	ENSG00000171824	-0.116898	-1.06878	0
SMS	ENSG00000102172	-0.116829	-1.06772	0
MARCH2	ENSG00000099785	-0.116812	-1.06745	0
ITPR1	ENSG00000150995	-0.116809	-1.06741	0
SCN1B	ENSG00000105711	-0.116639	-1.06482	0
RALBP1	ENSG00000017797	-0.116583	-1.06396	0
NPTN	ENSG00000156642	-0.116519	-1.06297	0
QSOX1	ENSG00000116260	-0.116433	-1.06166	0
APC	ENSG00000134982	-0.116404	-1.06122	0
ADPGK	ENSG00000159322	-0.116372	-1.06072	0
LIPA	ENSG00000107798	-0.116369	-1.06068	0
NOL7	ENSG00000225921	-0.116303	-1.05968	0
CD63	ENSG00000135404	-0.116088	-1.05637	1
ALDH5A1	ENSG00000112294	-0.116053	-1.05584	0
TMEM86A	ENSG00000151117	-0.116051	-1.05581	0
TLE4	ENSG00000106829	-0.116017	-1.0553	0
AHSA1	ENSG00000100591	-0.116009	-1.05517	0
CLSTN1	ENSG00000171603	-0.115997	-1.05499	0
LRPAP1	ENSG00000163956	-0.115984	-1.05478	0
LARP4	ENSG00000161813	-0.115876	-1.05313	0
RBP7	ENSG00000162444	-0.115857	-1.05284	0
NF2	ENSG00000186575	-0.115706	-1.05054	0
TTC39B	ENSG00000155158	-0.1157	-1.05044	0
LAP3	ENSG00000002549	-0.115577	-1.04856	0
NOTCH2	ENSG00000134250	-0.115519	-1.04767	0
GRIPAP1	ENSG00000068400	-0.115486	-1.04717	0
CSF3R	ENSG00000119535	-0.115375	-1.04546	1
FURIN	ENSG00000140564	-0.115342	-1.04496	0
PBXIP1	ENSG00000163346	-0.115323	-1.04468	0
ZDHHC20	ENSG00000180776	-0.115323	-1.04467	0
PGPEP1	ENSG00000130517	-0.115309	-1.04446	0
MTMR10	ENSG00000166912	-0.115224	-1.04315	0
DRAP1	ENSG00000175550	-0.115214	-1.043	0
AKAP9	ENSG00000127914	-0.115171	-1.04235	0
SEMA4D	ENSG00000187764	-0.115145	-1.04195	1
HK2	ENSG00000159399	-0.115022	-1.04006	0
SEC14L1	ENSG00000129657	-0.115019	-1.04002	0
VCL	ENSG00000035403	-0.114995	-1.03966	0
HSPB1	ENSG00000106211	-0.114977	-1.03937	0
LHFPL2	ENSG00000145685	-0.114956	-1.03905	0
METRNL	ENSG00000176845	-0.114944	-1.03887	0
TRMT2A	ENSG00000099899	-0.114942	-1.03884	0
TREX1	ENSG00000213689	-0.114907	-1.03831	0
SNAP29	ENSG00000099940	-0.114861	-1.0376	0
HK3	ENSG00000160883	-0.114789	-1.03651	0
GNPTAB	ENSG00000111670	-0.114628	-1.03404	0
MFSD1	ENSG00000118855	-0.114585	-1.03338	0
ZNF430	ENSG00000118620	-0.11447	-1.03162	0
MYO1G	ENSG00000136286	-0.114445	-1.03124	0
SPTLC2	ENSG00000100596	-0.114339	-1.02961	0
ZMYND8	ENSG00000101040	-0.11427	-1.02855	0
RNF145	ENSG00000145860	-0.114256	-1.02834	0
CRK	ENSG00000167193	-0.114168	-1.027	0
HMGN2	ENSG00000198830	-0.114165	-1.02696	0
GPATCH2L	ENSG00000089916	-0.11412	-1.02626	0
DOCK2	ENSG00000134516	-0.114114	-1.02617	0
OAS2	ENSG00000111335	-0.114111	-1.02613	0
PICALM	ENSG00000073921	-0.114062	-1.02537	0
UTP3	ENSG00000132467	-0.114055	-1.02526	0
BRI3BP	ENSG00000184992	-0.114053	-1.02524	0
MT-ND6	ENSG00000198695	-0.114017	-1.02468	0
ACSL3	ENSG00000123983	-0.11401	-1.02457	0
SEMA3C	ENSG00000075223	-0.113992	-1.02431	0
SNN	ENSG00000184602	-0.113933	-1.0234	0
IFITM2	ENSG00000185201	-0.113881	-1.0226	0
LMAN2L	ENSG00000114988	-0.113871	-1.02245	0
PAIP2	ENSG00000120727	-0.113865	-1.02236	0
GART	ENSG00000159131	-0.113845	-1.02206	0
SLC25A24	ENSG00000085491	-0.113786	-1.02114	0
HPS4	ENSG00000100099	-0.11372	-1.02013	0
SUV420H1	ENSG00000110066	-0.113719	-1.02012	0
IL10RB	ENSG00000243646	-0.113718	-1.02011	1
INO80D	ENSG00000114933	-0.113601	-1.01832	0
LNPEP	ENSG00000113441	-0.113538	-1.01735	0
ADNP	ENSG00000101126	-0.113467	-1.01627	0
CMTR1	ENSG00000137200	-0.11334	-1.01433	0
TRIM8	ENSG00000171206	-0.113322	-1.01404	0
SEL1L	ENSG00000071537	-0.113133	-1.01116	0
CABIN1	ENSG00000099991	-0.113063	-1.01009	0
DUSP23	ENSG00000158716	-0.112984	-1.00888	0
HSH2D	ENSG00000196684	-0.112896	-1.00752	0
EIF2AK2	ENSG00000055332	-0.112875	-1.00721	0
P2RY8	ENSG00000182162	-0.112839	-1.00665	0
FCN1	ENSG00000085265	-0.112776	-1.00569	0
DNTTIP2	ENSG00000067334	-0.112743	-1.00519	0
PABPC1	ENSG00000070756	-0.112678	-1.0042	0
SLC27A1	ENSG00000130304	-0.11267	-1.00407	0
YWHAG	ENSG00000170027	-0.112652	-1.0038	0
TBC1D22A	ENSG00000054611	-0.11262	-1.0033	0
SMARCA4	ENSG00000127616	-0.112598	-1.00297	0
SH3KBP1	ENSG00000147010	-0.112559	-1.00237	0
RAB8B	ENSG00000166128	-0.112506	-1.00155	0
HERC5	ENSG00000138646	-0.112477	-1.00112	0
NAMPT	ENSG00000105835	-0.112394	-0.99984	0
IFITM1	ENSG00000185885	-0.112376	-0.999576	1
SCYL1	ENSG00000142186	-0.112265	-0.997869	0
MVP	ENSG00000013364	-0.112215	-0.997109	0
ZBTB7A	ENSG00000178951	-0.112154	-0.996171	0
DBNDD2	ENSG00000244274	-0.112132	-0.995841	0
RBBP7	ENSG00000102054	-0.112113	-0.995542	0
USP42	ENSG00000106346	-0.112053	-0.994633	0
CDK18	ENSG00000117266	-0.111964	-0.993266	0
USP11	ENSG00000102226	-0.111964	-0.993266	0
ZCCHC6	ENSG00000083223	-0.111721	-0.989548	0
SPINT2	ENSG00000167642	-0.111674	-0.988831	0
P2RX1	ENSG00000108405	-0.111589	-0.98753	0
PARP9	ENSG00000138496	-0.111553	-0.986981	0
TAOK1	ENSG00000160551	-0.11155	-0.986923	0
CPT1A	ENSG00000110090	-0.111536	-0.986721	0
RENBP	ENSG00000102032	-0.11141	-0.98478	0
TOR1AIP2	ENSG00000169905	-0.111153	-0.980859	0
CTBP2	ENSG00000175029	-0.111108	-0.980165	0
PRKAR1A	ENSG00000108946	-0.111026	-0.978915	0
ZNF217	ENSG00000171940	-0.110918	-0.977251	0
BPTF	ENSG00000171634	-0.110912	-0.977168	0
TOM1	ENSG00000100284	-0.110903	-0.977028	0
RP11-427H3.3	ENSG00000188971	-0.110897	-0.97693	0
NR3C1	ENSG00000113580	-0.11089	-0.976833	0
TMEM192	ENSG00000170088	-0.110809	-0.975587	0
ARL4C	ENSG00000188042	-0.110791	-0.975313	0
SAV1	ENSG00000151748	-0.110748	-0.974649	0
IFITM10	ENSG00000244242	-0.110737	-0.974483	0
TSC2	ENSG00000103197	-0.110725	-0.974308	0
USP14	ENSG00000101557	-0.110707	-0.974035	0
SDCCAG3	ENSG00000165689	-0.110604	-0.972458	0
TMEM8A	ENSG00000129925	-0.110451	-0.970108	0
EXOC3	ENSG00000180104	-0.110432	-0.969819	0
RANGAP1	ENSG00000100401	-0.11037	-0.968878	0
AIM1	ENSG00000112297	-0.110273	-0.96739	0
FAM168A	ENSG00000054965	-0.110129	-0.96519	0
TCF25	ENSG00000141002	-0.110048	-0.963942	0
YLPM1	ENSG00000119596	-0.109984	-0.962964	0
TCIRG1	ENSG00000110719	-0.109922	-0.96201	0
TBL1X	ENSG00000101849	-0.109879	-0.961358	0
WDR81	ENSG00000167716	-0.109872	-0.961251	0
ARHGAP17	ENSG00000140750	-0.109813	-0.960352	0
ANKRD13D	ENSG00000172932	-0.109765	-0.95961	0
ANP32A	ENSG00000140350	-0.109663	-0.958052	0
ZC3H11A	ENSG00000058673	-0.109652	-0.957886	0
TAGAP	ENSG00000164691	-0.109513	-0.95575	0
DHX15	ENSG00000109606	-0.109423	-0.954385	0
SPIRE1	ENSG00000134278	-0.109419	-0.954324	0
STAT2	ENSG00000170581	-0.109406	-0.954119	0
ERP29	ENSG00000089248	-0.109243	-0.951627	0
IGF1R	ENSG00000140443	-0.109222	-0.951305	1
RBM25	ENSG00000119707	-0.10908	-0.949122	0
MITF	ENSG00000187098	-0.108995	-0.947835	0
ATP6V1B2	ENSG00000147416	-0.108974	-0.947501	0
RAB4B	ENSG00000167578	-0.108964	-0.947351	0
GCHFR	ENSG00000137880	-0.108866	-0.945848	0
CDV3	ENSG00000091527	-0.108865	-0.945834	0
ARL8A	ENSG00000143862	-0.108836	-0.945397	0
ZER1	ENSG00000160445	-0.108815	-0.945073	0
LEPROT	ENSG00000213625	-0.108807	-0.944953	0
CYP51A1	ENSG00000001630	-0.10877	-0.94439	0
PJA2	ENSG00000198961	-0.1087	-0.943308	0
MRPL28	ENSG00000086504	-0.10849	-0.940092	0
PPARD	ENSG00000112033	-0.108469	-0.939773	0
CLN6	ENSG00000128973	-0.108436	-0.939279	0
HSD17B4	ENSG00000133835	-0.108427	-0.939128	0
SNX9	ENSG00000130340	-0.108423	-0.93907	0
CCDC117	ENSG00000159873	-0.108414	-0.938929	0
QKI	ENSG00000112531	-0.108396	-0.938665	0
ITGA5	ENSG00000161638	-0.108363	-0.938157	1
LUC7L3	ENSG00000108848	-0.10835	-0.937954	0
ADRBK2	ENSG00000100077	-0.108158	-0.935016	0
PAPOLA	ENSG00000090060	-0.108149	-0.934886	0
OSGIN1	ENSG00000140961	-0.108143	-0.93479	0
RFK	ENSG00000135002	-0.108126	-0.934535	0
MAGT1	ENSG00000102158	-0.107983	-0.932338	0
SLC37A1	ENSG00000160190	-0.10798	-0.932301	0
ARGLU1	ENSG00000134884	-0.107947	-0.931786	0
PARP10	ENSG00000178685	-0.107918	-0.931344	0
CYLD	ENSG00000083799	-0.107905	-0.931139	0
ABHD17A	ENSG00000129968	-0.10784	-0.930158	0
C10orf12	ENSG00000155640	-0.107773	-0.929129	0
CASC3	ENSG00000108349	-0.107738	-0.928592	0
NAGK	ENSG00000124357	-0.107704	-0.928072	0
IWS1	ENSG00000163166	-0.10765	-0.927246	0
MORF4L1	ENSG00000185787	-0.107626	-0.926869	0
VAPB	ENSG00000124164	-0.107617	-0.926745	0
RTN4R	ENSG00000040608	-0.107593	-0.926364	0
ERLEC1	ENSG00000068912	-0.10749	-0.924796	0
PLEK	ENSG00000115956	-0.107487	-0.924747	0
C15orf38	ENSG00000242498	-0.107473	-0.924527	0
SP110	ENSG00000135899	-0.107371	-0.922981	0
ADRBK1	ENSG00000173020	-0.10729	-0.921736	0
STX2	ENSG00000111450	-0.107276	-0.921515	0
WAS	ENSG00000015285	-0.107272	-0.921456	0
MAN1A1	ENSG00000111885	-0.107256	-0.921211	0
TIAM1	ENSG00000156299	-0.107253	-0.921172	0
SCAMP4	ENSG00000227500	-0.107161	-0.919754	0
HECTD1	ENSG00000092148	-0.107156	-0.919676	0
ARL8B	ENSG00000134108	-0.1071	-0.91882	0
RCSD1	ENSG00000198771	-0.107074	-0.918426	0
LONRF3	ENSG00000175556	-0.107023	-0.917648	0
CARS2	ENSG00000134905	-0.106998	-0.917258	0
PKN1	ENSG00000123143	-0.106991	-0.917152	0
POGK	ENSG00000143157	-0.106987	-0.917094	0
HSPD1	ENSG00000144381	-0.106951	-0.91655	0
ATRN	ENSG00000088812	-0.106902	-0.915803	0
BLOC1S3	ENSG00000189114	-0.106897	-0.915722	0
SREBF1	ENSG00000072310	-0.106895	-0.915686	0
SFPQ	ENSG00000116560	-0.106885	-0.915536	0
TPCN2	ENSG00000162341	-0.106881	-0.91548	0
COPS7A	ENSG00000111652	-0.10685	-0.915006	0
CES1	ENSG00000198848	-0.106838	-0.91481	0
SRCAP	ENSG00000080603	-0.10679	-0.914078	0
PABPC4	ENSG00000090621	-0.106749	-0.913447	0
ATRX	ENSG00000085224	-0.10668	-0.912396	0
RRAGC	ENSG00000116954	-0.106649	-0.911928	0
DNAJC5	ENSG00000101152	-0.106647	-0.911887	0
TANC2	ENSG00000170921	-0.106639	-0.911765	0
ICAM1	ENSG00000090339	-0.106571	-0.910723	1
FAIM3	ENSG00000162894	-0.106544	-0.910325	0
RTF1	ENSG00000137815	-0.106511	-0.909812	0
G3BP2	ENSG00000138757	-0.106498	-0.909613	0
TIAF1	ENSG00000221995	-0.106475	-0.909264	0
VOPP1	ENSG00000154978	-0.106451	-0.908898	0
BRD3	ENSG00000169925	-0.106432	-0.908607	0
MARCKS	ENSG00000155130	-0.106344	-0.907253	0
PRRC2B	ENSG00000130723	-0.10633	-0.907043	0
MINK1	ENSG00000141503	-0.106322	-0.906922	0
GBP5	ENSG00000154451	-0.10624	-0.90567	0
MANBA	ENSG00000109323	-0.106183	-0.904793	0
TXNIP	ENSG00000117289	-0.106139	-0.904118	0
OGFR	ENSG00000060491	-0.106121	-0.903842	0
OSGIN2	ENSG00000164823	-0.106087	-0.903328	0
TNRC6A	ENSG00000090905	-0.106024	-0.902356	0
PLA2G15	ENSG00000103066	-0.106012	-0.902174	0
CSGALNACT2	ENSG00000169826	-0.106011	-0.902161	0
DDX27	ENSG00000124228	-0.10599	-0.901846	0
VARS	ENSG00000204394	-0.105981	-0.901695	0
KDM5A	ENSG00000073614	-0.105908	-0.900576	0
RREB1	ENSG00000124782	-0.1059	-0.900456	0
HMGXB4	ENSG00000100281	-0.105894	-0.900374	0
PLXND1	ENSG00000004399	-0.105853	-0.89974	0
CLN8	ENSG00000182372	-0.105846	-0.89964	0
BSDC1	ENSG00000160058	-0.105838	-0.899515	0
LACC1	ENSG00000179630	-0.105779	-0.898608	0
AMPD3	ENSG00000133805	-0.105735	-0.897932	0
RIN2	ENSG00000132669	-0.105661	-0.896803	0
JOSD1	ENSG00000100221	-0.105604	-0.895924	0
H6PD	ENSG00000049239	-0.105571	-0.895422	0
KIF1C	ENSG00000129250	-0.10556	-0.895261	0
TRPV2	ENSG00000187688	-0.105536	-0.894898	0
KIF16B	ENSG00000089177	-0.105528	-0.894772	0
SDC3	ENSG00000162512	-0.105523	-0.894698	0
SF3A1	ENSG00000099995	-0.105476	-0.893967	0
FLII	ENSG00000177731	-0.105455	-0.893655	0
FAM50A	ENSG00000071859	-0.10545	-0.893568	0
SLC15A4	ENSG00000139370	-0.105399	-0.892797	0
MDFIC	ENSG00000135272	-0.105389	-0.892637	0
GNA13	ENSG00000120063	-0.105327	-0.891698	0
CDC42BPB	ENSG00000198752	-0.105235	-0.890278	0
TMEM55B	ENSG00000165782	-0.105231	-0.890216	0
ASRGL1	ENSG00000162174	-0.105221	-0.890065	0
CAPN1	ENSG00000014216	-0.105218	-0.89002	0
SRRT	ENSG00000087087	-0.105187	-0.889553	0
FUBP1	ENSG00000162613	-0.105165	-0.889207	0
GAS7	ENSG00000007237	-0.105164	-0.8892	0
PFKFB3	ENSG00000170525	-0.105124	-0.888582	0
RASAL2	ENSG00000075391	-0.105121	-0.888532	0
NCKAP5L	ENSG00000167566	-0.105108	-0.888339	0
APOL3	ENSG00000128284	-0.105048	-0.887418	0
ZNF592	ENSG00000166716	-0.105015	-0.886924	0
MAP1S	ENSG00000130479	-0.10501	-0.886844	0
RNASEH1	ENSG00000171865	-0.105009	-0.886819	0
INPP5B	ENSG00000204084	-0.104952	-0.885954	0
FLNA	ENSG00000196924	-0.104941	-0.885785	0
PDLIM5	ENSG00000163110	-0.104901	-0.885168	0
CD36	ENSG00000135218	-0.104845	-0.884319	1
IFFO1	ENSG00000010295	-0.104709	-0.882229	0
CAMP	ENSG00000164047	-0.104652	-0.881355	0
BAG3	ENSG00000151929	-0.104648	-0.881307	0
DCAF7	ENSG00000136485	-0.104565	-0.880023	0
OTOA	ENSG00000155719	-0.104555	-0.879875	0
REEP3	ENSG00000165476	-0.104539	-0.879633	0
CYTH4	ENSG00000100055	-0.104444	-0.878174	0
CLEC10A	ENSG00000132514	-0.104416	-0.877746	1
KLHDC3	ENSG00000124702	-0.104407	-0.877606	0
CD164	ENSG00000135535	-0.104359	-0.876885	1
TRIO	ENSG00000038382	-0.104331	-0.876453	0
TMEM159	ENSG00000011638	-0.104311	-0.876146	0
BRI3	ENSG00000164713	-0.104305	-0.876049	0
CYTL1	ENSG00000170891	-0.104128	-0.873349	0
NONO	ENSG00000147140	-0.104078	-0.872578	0
SORBS3	ENSG00000120896	-0.103998	-0.871357	0
ZCCHC2	ENSG00000141664	-0.103986	-0.871161	0
ISG15	ENSG00000187608	-0.103968	-0.870888	0
MTCH1	ENSG00000137409	-0.103891	-0.869716	0
RNF168	ENSG00000163961	-0.103854	-0.869156	0
FAM120A	ENSG00000048828	-0.103773	-0.867906	0
MRPS34	ENSG00000074071	-0.103669	-0.866323	0
ZBTB24	ENSG00000112365	-0.103632	-0.865751	0
IL6R	ENSG00000160712	-0.103601	-0.865279	1
CTNNBL1	ENSG00000132792	-0.10356	-0.864657	0
ADAM10	ENSG00000137845	-0.10348	-0.863423	1
UPF1	ENSG00000005007	-0.10347	-0.863274	0
GNL2	ENSG00000134697	-0.103371	-0.861764	0
TET2	ENSG00000168769	-0.103337	-0.861241	0
TNFSF14	ENSG00000125735	-0.103335	-0.861203	1
DIDO1	ENSG00000101191	-0.103334	-0.861197	0
TCF4	ENSG00000196628	-0.103325	-0.861052	0
PRMT2	ENSG00000160310	-0.103296	-0.860604	0
NINJ2	ENSG00000171840	-0.103278	-0.860328	0
OSBPL11	ENSG00000144909	-0.103276	-0.860297	0
FGD5-AS1	ENSG00000225733	-0.103173	-0.858722	0
EEA1	ENSG00000102189	-0.103066	-0.857092	0
MXI1	ENSG00000119950	-0.102969	-0.855608	0
MARCH8	ENSG00000165406	-0.102927	-0.854966	0
TARDBP	ENSG00000120948	-0.10291	-0.854703	0
HAGHL	ENSG00000103253	-0.102884	-0.854304	0
E2F3	ENSG00000112242	-0.102829	-0.853465	0
FNBP1	ENSG00000187239	-0.102744	-0.852166	0
CNTRL	ENSG00000119397	-0.102709	-0.851624	0
SLC29A1	ENSG00000112759	-0.102699	-0.851479	0
TNFAIP8L1	ENSG00000185361	-0.10263	-0.850419	0
HNRNPH1	ENSG00000169045	-0.102575	-0.849575	0
SERTAD2	ENSG00000179833	-0.102569	-0.849482	0
TRIP10	ENSG00000125733	-0.102545	-0.849112	0
FAM134C	ENSG00000141699	-0.10253	-0.848888	0
ANKRD11	ENSG00000167522	-0.10251	-0.848581	0
ARHGEF1	ENSG00000076928	-0.102475	-0.848051	0
ACOT9	ENSG00000123130	-0.102467	-0.847923	0
MVB12B	ENSG00000196814	-0.102394	-0.8468	0
EYA3	ENSG00000158161	-0.102297	-0.845324	0
IRF5	ENSG00000128604	-0.102291	-0.845231	0
TAF13	ENSG00000197780	-0.102283	-0.845109	0
TNFSF13B	ENSG00000102524	-0.102273	-0.844959	1
TYROBP	ENSG00000011600	-0.102273	-0.844954	0
KRCC1	ENSG00000172086	-0.102259	-0.844733	0
LRCH3	ENSG00000186001	-0.10225	-0.844608	0
VPS18	ENSG00000104142	-0.102203	-0.843883	0
CCDC107	ENSG00000159884	-0.102201	-0.843845	0
GLB1	ENSG00000170266	-0.102098	-0.84227	0
PI4K2A	ENSG00000249967	-0.102095	-0.842221	0
OSBP	ENSG00000110048	-0.102055	-0.841615	0
CHORDC1	ENSG00000110172	-0.101933	-0.839748	0
GNA15	ENSG00000060558	-0.101929	-0.839693	0
ARHGAP35	ENSG00000160007	-0.101808	-0.837832	0
CDC40	ENSG00000168438	-0.101796	-0.837649	0
RRP1B	ENSG00000160208	-0.101788	-0.837531	0
RP11-732M18.3	ENSG00000236537	-0.101744	-0.836852	0
SPATS2L	ENSG00000196141	-0.10174	-0.836794	0
CELF1	ENSG00000149187	-0.101688	-0.836001	0
ARID1B	ENSG00000049618	-0.101685	-0.835956	0
RHBDF2	ENSG00000129667	-0.101612	-0.834838	0
ZNF611	ENSG00000213020	-0.101478	-0.832783	0
PPM1G	ENSG00000115241	-0.101465	-0.832581	0
PDPK1	ENSG00000140992	-0.101429	-0.832042	0
TMOD3	ENSG00000138594	-0.101391	-0.83145	0
LCP2	ENSG00000043462	-0.101342	-0.830698	0
MR1	ENSG00000153029	-0.101333	-0.830565	0
GPAA1	ENSG00000197858	-0.101297	-0.830012	0
DENND5A	ENSG00000184014	-0.101273	-0.829647	0
UBE2B	ENSG00000119048	-0.101154	-0.827828	0
ADIPOR1	ENSG00000159346	-0.10113	-0.827454	0
RP1-178F10.3	ENSG00000267350	-0.101041	-0.826104	0
ARHGEF40	ENSG00000165801	-0.100992	-0.82535	0
DCP2	ENSG00000172795	-0.100967	-0.824959	0
EZH1	ENSG00000108799	-0.100929	-0.824388	0
APOL6	ENSG00000221963	-0.100929	-0.824377	0
CEP104	ENSG00000116198	-0.100909	-0.824082	0
VDR	ENSG00000111424	-0.100843	-0.823072	0
PLD1	ENSG00000075651	-0.100838	-0.822989	0
SLAIN2	ENSG00000109171	-0.1008	-0.822417	0
EIF5B	ENSG00000158417	-0.100742	-0.821519	0
BMF	ENSG00000104081	-0.100742	-0.821515	0
HSD17B12	ENSG00000149084	-0.100725	-0.821266	0
PHF11	ENSG00000136147	-0.100697	-0.820829	0
DDX3X	ENSG00000215301	-0.100657	-0.820219	0
KDM5B	ENSG00000117139	-0.100621	-0.819675	0
GDI1	ENSG00000203879	-0.100593	-0.819245	0
MARCH1	ENSG00000145416	-0.100479	-0.817491	0
CSTF3	ENSG00000176102	-0.1004	-0.816292	0
PHF3	ENSG00000118482	-0.100385	-0.816054	0
PLEKHG3	ENSG00000126822	-0.100379	-0.815959	0
TWF2	ENSG00000247596	-0.100311	-0.814922	0
P2RY11	ENSG00000244165	-0.100211	-0.813402	0
MLXIP	ENSG00000175727	-0.100198	-0.813192	0
UVRAG	ENSG00000198382	-0.10012	-0.812001	0
ZNF609	ENSG00000180357	-0.100117	-0.811952	0
BNIP3L	ENSG00000104765	-0.0999135	-0.808842	0
PRPF40A	ENSG00000196504	-0.0998961	-0.808577	0
CYBB	ENSG00000165168	-0.0998278	-0.807531	0
ELF4	ENSG00000102034	-0.0998129	-0.807303	0
HSPA1B	ENSG00000204388	-0.0998116	-0.807283	0
PTPN9	ENSG00000169410	-0.0998005	-0.807113	0
AGPAT2	ENSG00000169692	-0.0997988	-0.807086	0
IDH2	ENSG00000182054	-0.0996931	-0.80547	0
DENND6A	ENSG00000174839	-0.0996544	-0.804877	0
DHX38	ENSG00000140829	-0.0996479	-0.804777	0
ABL2	ENSG00000143322	-0.0996292	-0.804491	0
SLC38A10	ENSG00000157637	-0.0995975	-0.804006	0
FKBP5	ENSG00000096060	-0.0995339	-0.803033	0
AP1G1	ENSG00000166747	-0.0994254	-0.801372	0
ETV3	ENSG00000117036	-0.0993809	-0.800692	0
ZDHHC12	ENSG00000160446	-0.0993671	-0.80048	0
ITPK1	ENSG00000100605	-0.0992582	-0.798814	0
RAD21	ENSG00000164754	-0.0992556	-0.798773	0
KPNA4	ENSG00000186432	-0.0992459	-0.798625	0
TET3	ENSG00000187605	-0.0991605	-0.797319	0
RP11-438J1.1	ENSG00000272410	-0.0991545	-0.797226	0
RAB14	ENSG00000119396	-0.0991282	-0.796824	0
LYL1	ENSG00000104903	-0.0990885	-0.796216	0
C17orf85	ENSG00000074356	-0.0990489	-0.79561	0
KDM3B	ENSG00000120733	-0.0990414	-0.795495	0
DVL3	ENSG00000161202	-0.0989033	-0.793382	0
RNF10	ENSG00000022840	-0.0988475	-0.792527	0
CYP20A1	ENSG00000119004	-0.098812	-0.791985	0
ANP32E	ENSG00000143401	-0.0987675	-0.791304	0
MPEG1	ENSG00000197629	-0.0987528	-0.791079	0
PPP1R12C	ENSG00000125503	-0.0987488	-0.791017	0
CRELD1	ENSG00000163703	-0.0987484	-0.791012	0
DDX58	ENSG00000107201	-0.0987268	-0.79068	0
ATP2A2	ENSG00000174437	-0.0987227	-0.790619	0
NUDT3	ENSG00000272325	-0.0986673	-0.789771	0
ZHX1	ENSG00000165156	-0.0986497	-0.789501	0
NFATC1	ENSG00000131196	-0.0986269	-0.789151	0
SPTAN1	ENSG00000197694	-0.0985957	-0.788674	0
TIMP2	ENSG00000035862	-0.0985913	-0.788606	0
ASPSCR1	ENSG00000169696	-0.0985158	-0.787451	0
CCSAP	ENSG00000154429	-0.0984981	-0.78718	0
RAB3D	ENSG00000105514	-0.0984968	-0.78716	0
CXCL16	ENSG00000161921	-0.0984863	-0.787001	0
GIT2	ENSG00000139436	-0.0984745	-0.786819	0
RIOK3	ENSG00000101782	-0.0984329	-0.786183	0
TPCN1	ENSG00000186815	-0.0983886	-0.785504	0
AKNA	ENSG00000106948	-0.0983729	-0.785265	0
NRM	ENSG00000137404	-0.0983392	-0.784749	0
RAPGEF1	ENSG00000107263	-0.0983356	-0.784694	0
NUB1	ENSG00000013374	-0.0982025	-0.782657	0
MATR3	ENSG00000015479	-0.0981773	-0.782271	0
NAGA	ENSG00000198951	-0.0981587	-0.781987	0
OSBPL2	ENSG00000130703	-0.0981481	-0.781825	0
TSPAN3	ENSG00000140391	-0.0981251	-0.781472	0
LPGAT1	ENSG00000123684	-0.0980948	-0.781009	0
MAP4	ENSG00000047849	-0.0980614	-0.780497	0
SLC35E3	ENSG00000175782	-0.0980105	-0.779719	0
PRKAA1	ENSG00000132356	-0.0979982	-0.77953	0
TUBGCP2	ENSG00000130640	-0.0979672	-0.779056	0
AGPS	ENSG00000018510	-0.0978243	-0.776869	0
MFSD10	ENSG00000109736	-0.0978059	-0.776587	0
RALB	ENSG00000144118	-0.0977576	-0.775848	0
TGFB1	ENSG00000105329	-0.0977569	-0.775837	0
ZC3H7A	ENSG00000122299	-0.0976716	-0.774532	0
CS	ENSG00000062485	-0.0976425	-0.774086	0
UBA7	ENSG00000182179	-0.0976373	-0.774007	0
ARL6IP1	ENSG00000170540	-0.0976353	-0.773977	0
STARD8	ENSG00000130052	-0.0976318	-0.773923	0
CTD-2207O23.10	ENSG00000268614	-0.0976231	-0.77379	0
SRSF2	ENSG00000161547	-0.0976066	-0.773536	0
DNMT3A	ENSG00000119772	-0.0975987	-0.773416	0
SH3PXD2B	ENSG00000174705	-0.0975939	-0.773342	0
NFKBIE	ENSG00000146232	-0.0975616	-0.772849	0
NSMCE1	ENSG00000169189	-0.0975569	-0.772776	0
CTBS	ENSG00000117151	-0.0975041	-0.771968	0
CCDC130	ENSG00000104957	-0.0974966	-0.771854	0
SMARCC1	ENSG00000173473	-0.0974633	-0.771344	0
KMT2E	ENSG00000005483	-0.0974558	-0.771229	0
NOM1	ENSG00000146909	-0.0974015	-0.770398	0
RAPGEF2	ENSG00000109756	-0.0973227	-0.769192	0
PIK3R1	ENSG00000145675	-0.0973127	-0.769039	0
TECPR1	ENSG00000205356	-0.0973043	-0.76891	0
WIPF2	ENSG00000171475	-0.097289	-0.768677	0
MDM2	ENSG00000135679	-0.0972293	-0.767762	0
YWHAH	ENSG00000128245	-0.0971663	-0.766799	0
ADD1	ENSG00000087274	-0.097164	-0.766763	0
SLC38A7	ENSG00000103042	-0.0971553	-0.766631	0
NFATC3	ENSG00000072736	-0.0970891	-0.765617	0
BRAT1	ENSG00000106009	-0.0970873	-0.76559	0
ORAI2	ENSG00000160991	-0.0970231	-0.764607	0
UBE2G2	ENSG00000184787	-0.0968912	-0.762588	0
LPP	ENSG00000145012	-0.0968096	-0.76134	0
EIF4EBP2	ENSG00000148730	-0.0967349	-0.760196	0
SETD1B	ENSG00000139718	-0.0967196	-0.759962	0
CCDC43	ENSG00000180329	-0.0967127	-0.759857	0
NRROS	ENSG00000174004	-0.0966927	-0.75955	0
FBRSL1	ENSG00000112787	-0.0966705	-0.75921	0
SF1	ENSG00000168066	-0.0966542	-0.758961	0
SERPINB1	ENSG00000021355	-0.096651	-0.758912	0
MAPKAPK2	ENSG00000162889	-0.0965977	-0.758097	0
ADAT3	ENSG00000213638	-0.0965687	-0.757652	0
SF3B1	ENSG00000115524	-0.096561	-0.757535	0
C19orf59	ENSG00000183019	-0.096516	-0.756846	0
CBX6	ENSG00000183741	-0.0964937	-0.756505	0
LRRC58	ENSG00000163428	-0.0964436	-0.755738	0
NADK	ENSG00000008130	-0.0964336	-0.755585	0
TBC1D9B	ENSG00000197226	-0.0963991	-0.755057	0
COMMD5	ENSG00000170619	-0.0963796	-0.754758	0
SNRNP70	ENSG00000104852	-0.0963452	-0.754233	0
CTNNA1	ENSG00000044115	-0.096241	-0.752637	0
CCDC137	ENSG00000185298	-0.0962392	-0.752611	0
HHEX	ENSG00000152804	-0.0962191	-0.752302	0
ASXL2	ENSG00000143970	-0.0962079	-0.752132	0
SLC35B4	ENSG00000205060	-0.0962051	-0.752088	0
RBM27	ENSG00000091009	-0.0961558	-0.751334	0
PRKDC	ENSG00000253729	-0.0960919	-0.750356	0
TFIP11	ENSG00000100109	-0.0960537	-0.749771	0
TXNDC11	ENSG00000153066	-0.0960399	-0.74956	0
TEX2	ENSG00000136478	-0.095981	-0.748658	0
PSMD2	ENSG00000175166	-0.0959806	-0.748653	0
AHR	ENSG00000106546	-0.0959313	-0.747898	0
ARFRP1	ENSG00000101246	-0.0959035	-0.747473	0
PPFIA1	ENSG00000131626	-0.0958284	-0.746323	0
NACC1	ENSG00000160877	-0.0958201	-0.746196	0
HIVEP1	ENSG00000095951	-0.0957852	-0.745663	0
RAB22A	ENSG00000124209	-0.0957482	-0.745096	0
FAM105A	ENSG00000145569	-0.0957337	-0.744874	0
ARID4B	ENSG00000054267	-0.0957218	-0.744692	0
GAK	ENSG00000178950	-0.0957074	-0.744471	0
CDK2AP2	ENSG00000167797	-0.0956691	-0.743886	0
OSTF1	ENSG00000134996	-0.0956665	-0.743846	0
NUP50	ENSG00000093000	-0.095624	-0.743195	0
SEPT6	ENSG00000125354	-0.0956126	-0.74302	0
SLC35E2B	ENSG00000189339	-0.0956105	-0.742988	0
MLKL	ENSG00000168404	-0.0955917	-0.742701	0
CDC42SE1	ENSG00000197622	-0.0955463	-0.742006	0
POLR1A	ENSG00000068654	-0.0955036	-0.741352	0
DENND2D	ENSG00000162777	-0.0954288	-0.740207	0
C12orf43	ENSG00000157895	-0.0953794	-0.739452	0
SLC43A3	ENSG00000134802	-0.0953221	-0.738574	0
IFNAR1	ENSG00000142166	-0.0953131	-0.738437	0
SERINC3	ENSG00000132824	-0.0953108	-0.738401	0
DCAF5	ENSG00000139990	-0.0952963	-0.738179	0
CASC4	ENSG00000166734	-0.0952927	-0.738125	0
STAT5A	ENSG00000126561	-0.0951226	-0.735521	0
CFLAR	ENSG00000003402	-0.0951031	-0.735223	0
GPR107	ENSG00000148358	-0.0951026	-0.735216	0
RP11-488C13.5	ENSG00000258301	-0.0950565	-0.73451	0
ZFPM1	ENSG00000179588	-0.0950093	-0.733787	0
SMG7	ENSG00000116698	-0.0949659	-0.733123	0
MDN1	ENSG00000112159	-0.0949586	-0.733012	0
PTBP3	ENSG00000119314	-0.0949579	-0.733	0
ADIPOR2	ENSG00000006831	-0.0949435	-0.732781	0
GGA3	ENSG00000125447	-0.0949211	-0.732437	0
SECISBP2L	ENSG00000138593	-0.0948349	-0.731118	0
BASP1	ENSG00000176788	-0.0948273	-0.731002	0
MAP3K4	ENSG00000085511	-0.09478	-0.730278	0
VPS4B	ENSG00000119541	-0.0947566	-0.72992	0
PLD3	ENSG00000105223	-0.094756	-0.729911	0
PRPF4B	ENSG00000112739	-0.0947432	-0.729715	0
UPF3A	ENSG00000169062	-0.0946579	-0.72841	0
KIAA1109	ENSG00000138688	-0.0946573	-0.7284	0
H2AFY	ENSG00000113648	-0.094647	-0.728242	0
ERCC5	ENSG00000134899	-0.0946248	-0.727903	0
TANK	ENSG00000136560	-0.0946116	-0.727701	0
CIC	ENSG00000079432	-0.0945599	-0.72691	0
CMPK1	ENSG00000162368	-0.0944693	-0.725523	0
MED13	ENSG00000108510	-0.0944062	-0.724557	0
ARHGEF18	ENSG00000104880	-0.0943814	-0.724178	0
PBRM1	ENSG00000163939	-0.094338	-0.723514	0
CD86	ENSG00000114013	-0.0943283	-0.723365	1
YWHAE	ENSG00000108953	-0.0943097	-0.72308	0
MECP2	ENSG00000169057	-0.0942698	-0.72247	0
FIG4	ENSG00000112367	-0.0942583	-0.722294	0
DNM2	ENSG00000079805	-0.0942555	-0.722251	0
RAB10	ENSG00000084733	-0.0942492	-0.722154	0
GCN1L1	ENSG00000089154	-0.0942479	-0.722135	0
ABCD1	ENSG00000101986	-0.0941761	-0.721036	0
SIK3	ENSG00000160584	-0.0941746	-0.721012	0
ATP6V1A	ENSG00000114573	-0.0941083	-0.719998	0
ADAM9	ENSG00000168615	-0.0940973	-0.719831	0
TMX4	ENSG00000125827	-0.0940702	-0.719415	0
AHCY	ENSG00000101444	-0.0940664	-0.719357	0
TMED2	ENSG00000086598	-0.0940628	-0.719303	0
ATP6V0D1	ENSG00000159720	-0.0939882	-0.718161	0
FGD4	ENSG00000139132	-0.0939391	-0.717409	0
DNAJC7	ENSG00000168259	-0.093932	-0.717301	0
FAM78A	ENSG00000126882	-0.0939183	-0.71709	0
USP19	ENSG00000172046	-0.093874	-0.716413	0
UTP14C	ENSG00000253797	-0.0938664	-0.716297	0
TLR2	ENSG00000137462	-0.0937658	-0.714756	1
FAM105B	ENSG00000154124	-0.0937524	-0.714552	0
S100A8	ENSG00000143546	-0.093737	-0.714316	0
PPP1R18	ENSG00000146112	-0.0937198	-0.714052	0
ANKRD40	ENSG00000154945	-0.0936946	-0.713667	0
ATM	ENSG00000149311	-0.0935882	-0.712038	0
RPS6KB1	ENSG00000108443	-0.0935858	-0.712002	0
CTNND1	ENSG00000198561	-0.0935832	-0.711963	0
WDFY3	ENSG00000163625	-0.0935426	-0.711341	0
SUGP2	ENSG00000064607	-0.0935134	-0.710893	0
DDX46	ENSG00000145833	-0.0934975	-0.71065	0
LFNG	ENSG00000106003	-0.0934777	-0.710347	0
BDP1	ENSG00000145734	-0.0934233	-0.709515	0
PPIB	ENSG00000166794	-0.0933886	-0.708984	0
SNX6	ENSG00000129515	-0.0933683	-0.708673	0
CCDC93	ENSG00000125633	-0.0932862	-0.707416	0
UPF2	ENSG00000151461	-0.0932644	-0.707083	0
POLR2A	ENSG00000181222	-0.0932014	-0.706118	0
ARF6	ENSG00000165527	-0.0930925	-0.704452	0
NCF1	ENSG00000158517	-0.0930923	-0.70445	0
CNDP2	ENSG00000133313	-0.0930369	-0.703602	0
ENG	ENSG00000106991	-0.0929931	-0.702931	1
MNDA	ENSG00000163563	-0.0929911	-0.702901	0
VAV1	ENSG00000141968	-0.0929739	-0.702637	0
SSFA2	ENSG00000138434	-0.0929467	-0.702221	0
TNNI2	ENSG00000130598	-0.0928713	-0.701067	0
PROSC	ENSG00000147471	-0.0928662	-0.700989	0
TNRC18	ENSG00000182095	-0.0928342	-0.700499	0
NSMAF	ENSG00000035681	-0.0928152	-0.700209	0
CUL2	ENSG00000108094	-0.0927957	-0.699911	0
ME2	ENSG00000082212	-0.0927576	-0.699327	0
UBXN7	ENSG00000163960	-0.0927472	-0.699168	0
FRAT2	ENSG00000181274	-0.0927151	-0.698677	0
KAT7	ENSG00000136504	-0.092686	-0.698231	0
RIPK1	ENSG00000137275	-0.092655	-0.697756	0
YBX3	ENSG00000060138	-0.0926378	-0.697493	0
LRRC57	ENSG00000180979	-0.0926175	-0.697182	0
WAC-AS1	ENSG00000254635	-0.0925855	-0.696693	0
DHRS7	ENSG00000100612	-0.0925743	-0.696522	0
EVL	ENSG00000196405	-0.0925714	-0.696477	0
TRIM22	ENSG00000132274	-0.092563	-0.696348	0
SNX30	ENSG00000148158	-0.0925613	-0.696322	0
RSBN1	ENSG00000081019	-0.0925441	-0.696059	0
MPHOSPH8	ENSG00000196199	-0.092451	-0.694634	0
RNF103-CHMP3	ENSG00000249884	-0.0924347	-0.694384	0
AKAP10	ENSG00000108599	-0.0924205	-0.694168	0
SEPHS2	ENSG00000179918	-0.0923954	-0.693784	0
DNAJC21	ENSG00000168724	-0.092349	-0.693074	0
GSDMD	ENSG00000104518	-0.0923485	-0.693066	0
RBM39	ENSG00000131051	-0.0923315	-0.692806	0
GINM1	ENSG00000055211	-0.0923268	-0.692734	0
RP11-349A22.5	ENSG00000257621	-0.0922982	-0.692296	0
LMAN1	ENSG00000074695	-0.0922893	-0.69216	0
TNFRSF10A	ENSG00000104689	-0.092216	-0.691038	1
GDE1	ENSG00000006007	-0.092208	-0.690916	0
ZCCHC14	ENSG00000140948	-0.0921867	-0.69059	0
AP5B1	ENSG00000254470	-0.0921642	-0.690245	0
SNURF	ENSG00000273173	-0.0921502	-0.69003	0
RUFY1	ENSG00000176783	-0.0921434	-0.689927	0
FAM198B	ENSG00000164125	-0.0921333	-0.689772	0
BECN1	ENSG00000126581	-0.0921171	-0.689524	0
PLBD2	ENSG00000151176	-0.0920663	-0.688746	0
SVIL	ENSG00000197321	-0.0920643	-0.688717	0
UTRN	ENSG00000152818	-0.0919983	-0.687706	0
GRAMD1A	ENSG00000089351	-0.0919794	-0.687418	0
CHFR	ENSG00000072609	-0.0919631	-0.687167	0
ARPC5L	ENSG00000136950	-0.0919604	-0.687127	0
KCTD20	ENSG00000112078	-0.0919554	-0.687049	0
SH3BP2	ENSG00000087266	-0.0919432	-0.686863	0
TAF8	ENSG00000137413	-0.0918662	-0.685684	0
UBR5	ENSG00000104517	-0.0918129	-0.684868	0
SASH3	ENSG00000122122	-0.0917819	-0.684394	0
ARHGAP22	ENSG00000128805	-0.0917043	-0.683207	0
SLC25A19	ENSG00000125454	-0.0916774	-0.682796	0
VPS37C	ENSG00000167987	-0.0916573	-0.682488	0
SAFB	ENSG00000160633	-0.0916431	-0.682271	0
RALGDS	ENSG00000160271	-0.0916334	-0.682122	0
ZBTB40	ENSG00000184677	-0.0916168	-0.681868	0
G3BP1	ENSG00000145907	-0.091592	-0.681488	0
UBE2F	ENSG00000184182	-0.091578	-0.681273	0
CAPN7	ENSG00000131375	-0.0915765	-0.681252	0
TNPO2	ENSG00000105576	-0.0914745	-0.67969	0
RNF216	ENSG00000011275	-0.0914725	-0.679659	0
DIAPH1	ENSG00000131504	-0.0914671	-0.679576	0
NIPAL2	ENSG00000104361	-0.0914585	-0.679445	0
TMEM51	ENSG00000171729	-0.091448	-0.679285	0
STK24	ENSG00000102572	-0.0914313	-0.679029	0
ZSWIM8	ENSG00000214655	-0.0913649	-0.678013	0
ZFR	ENSG00000056097	-0.0913522	-0.677818	0
TARS2	ENSG00000143374	-0.0912743	-0.676626	0
FAM53B	ENSG00000189319	-0.0911786	-0.675161	0
BAALC	ENSG00000164929	-0.0910969	-0.673911	0
ARHGEF3	ENSG00000163947	-0.0910579	-0.673314	0
NFX1	ENSG00000086102	-0.0910216	-0.672758	0
YWHAZ	ENSG00000164924	-0.0909825	-0.672161	0
DCAF6	ENSG00000143164	-0.0909494	-0.671653	0
MGAT5	ENSG00000152127	-0.0908954	-0.670827	0
PCMTD1	ENSG00000168300	-0.0907942	-0.669279	0
CRYL1	ENSG00000165475	-0.0907755	-0.668992	0
CTC-503J8.6	ENSG00000267427	-0.0907616	-0.66878	0
PIH1D1	ENSG00000104872	-0.0907302	-0.668299	0
SUMF2	ENSG00000129103	-0.0907263	-0.668239	0
TP53I13	ENSG00000167543	-0.0907104	-0.667995	0
DNASE1L1	ENSG00000013563	-0.0907011	-0.667854	0
SMG6	ENSG00000070366	-0.0906531	-0.667119	0
IPO8	ENSG00000133704	-0.0905654	-0.665777	0
RMDN3	ENSG00000137824	-0.0904608	-0.664176	0
DDX21	ENSG00000165732	-0.0904543	-0.664077	0
SYS1	ENSG00000204070	-0.0903964	-0.663191	0
TCP1	ENSG00000120438	-0.0903873	-0.663052	0
CLIP2	ENSG00000106665	-0.0903821	-0.662971	0
HSPA9	ENSG00000113013	-0.090336	-0.662266	0
ANAPC7	ENSG00000196510	-0.0902163	-0.660434	0
LYSMD2	ENSG00000140280	-0.0901486	-0.659399	0
UBTD2	ENSG00000168246	-0.0901091	-0.658793	0
PIAS4	ENSG00000105229	-0.0900597	-0.658037	0
HPS3	ENSG00000163755	-0.0900325	-0.657622	0
CORO1B	ENSG00000172725	-0.0900291	-0.65757	0
HP1BP3	ENSG00000127483	-0.0900186	-0.657409	0
DCAF11	ENSG00000100897	-0.0899901	-0.656973	0
HNRNPM	ENSG00000099783	-0.0899882	-0.656943	0
SECISBP2	ENSG00000187742	-0.0898919	-0.655469	0
BHLHE41	ENSG00000123095	-0.0898388	-0.654657	0
R3HDM4	ENSG00000198858	-0.0898349	-0.654597	0
TRIM65	ENSG00000141569	-0.0897173	-0.652797	0
AK4	ENSG00000162433	-0.0896338	-0.65152	0
USO1	ENSG00000138768	-0.0895875	-0.65081	0
C3orf62	ENSG00000188315	-0.0895591	-0.650376	0
SYNCRIP	ENSG00000135316	-0.0894988	-0.649453	0
VRK3	ENSG00000105053	-0.0894723	-0.649048	0
RNF166	ENSG00000158717	-0.0894254	-0.648331	0
CHMP4B	ENSG00000101421	-0.0894162	-0.648189	0
GABARAPL1	ENSG00000139112	-0.0894069	-0.648048	0
CALM1	ENSG00000198668	-0.0893785	-0.647612	0
TMEM63A	ENSG00000196187	-0.089283	-0.646151	0
ZFHX3	ENSG00000140836	-0.0892721	-0.645984	0
NKAP	ENSG00000101882	-0.0892615	-0.645822	0
RAB3GAP2	ENSG00000118873	-0.0892336	-0.645394	0
SYNGR2	ENSG00000108639	-0.0892194	-0.645178	0
BRD7	ENSG00000166164	-0.0891971	-0.644836	0
WHAMM	ENSG00000156232	-0.0891847	-0.644646	0
ZCCHC8	ENSG00000033030	-0.089178	-0.644544	0
RABGGTA	ENSG00000100949	-0.0891767	-0.644524	0
OGFOD3	ENSG00000181396	-0.0891557	-0.644202	0
PPP1R10	ENSG00000204569	-0.0890904	-0.643204	0
EFTUD2	ENSG00000108883	-0.0890865	-0.643143	0
AC093673.5	ENSG00000232533	-0.0890771	-0.642999	0
CHERP	ENSG00000085872	-0.0890666	-0.642839	0
BCAP31	ENSG00000185825	-0.089065	-0.642814	0
CTNNB1	ENSG00000168036	-0.089058	-0.642708	0
SLAMF8	ENSG00000158714	-0.089047	-0.642539	1
PIGQ	ENSG00000007541	-0.089029	-0.642264	0
IFI35	ENSG00000068079	-0.0890122	-0.642007	0
ATL3	ENSG00000184743	-0.088987	-0.641621	0
CSNK1G1	ENSG00000169118	-0.0889081	-0.640413	0
NEK6	ENSG00000119408	-0.0889037	-0.640346	0
HNRNPK	ENSG00000165119	-0.088783	-0.638498	0
ZRANB1	ENSG00000019995	-0.0886917	-0.637101	0
CREB3	ENSG00000107175	-0.0886861	-0.637015	0
BAIAP2-AS1	ENSG00000226137	-0.0886633	-0.636668	0
SMNDC1	ENSG00000119953	-0.0886621	-0.636648	0
RRNAD1	ENSG00000143303	-0.088658	-0.636585	0
DYRK1A	ENSG00000157540	-0.0886549	-0.636539	0
PSMC3	ENSG00000165916	-0.0886242	-0.636069	0
NCKAP1L	ENSG00000123338	-0.0886233	-0.636054	0
CHURC1	ENSG00000258289	-0.0885953	-0.635626	0
GALK1	ENSG00000108479	-0.0885892	-0.635532	0
TM9SF2	ENSG00000125304	-0.0885845	-0.63546	0
MGRN1	ENSG00000102858	-0.0885769	-0.635344	0
LPIN2	ENSG00000101577	-0.0885197	-0.634469	0
NF1	ENSG00000196712	-0.0885079	-0.634288	0
RAB32	ENSG00000118508	-0.088479	-0.633847	0
SP100	ENSG00000067066	-0.0883969	-0.63259	0
TMEM11	ENSG00000178307	-0.0883789	-0.632314	0
SFXN3	ENSG00000107819	-0.0883727	-0.632219	0
EXTL3	ENSG00000012232	-0.0883403	-0.631723	0
GNL3L	ENSG00000130119	-0.0883164	-0.631357	0
NSUN5	ENSG00000130305	-0.0882822	-0.630834	0
LINC00969	ENSG00000242086	-0.0882781	-0.630772	0
RNF149	ENSG00000163162	-0.0882671	-0.630604	0
IGHMBP2	ENSG00000132740	-0.0882441	-0.630251	0
TRAK2	ENSG00000115993	-0.0882014	-0.629597	0
IKBKB	ENSG00000104365	-0.0881996	-0.62957	0
STAT5B	ENSG00000173757	-0.0881935	-0.629477	0
DIP2B	ENSG00000066084	-0.0881666	-0.629066	0
ARRDC1	ENSG00000197070	-0.0881331	-0.628552	0
GBP1	ENSG00000117228	-0.0881222	-0.628386	0
DNAJC3	ENSG00000102580	-0.0881083	-0.628173	0
CPVL	ENSG00000106066	-0.0880911	-0.62791	0
USP32	ENSG00000170832	-0.0880841	-0.627802	0
BCKDHA	ENSG00000248098	-0.0880712	-0.627605	0
P4HA1	ENSG00000122884	-0.0880386	-0.627106	0
NCOA6	ENSG00000198646	-0.0880103	-0.626673	0
UBTF	ENSG00000108312	-0.0879814	-0.62623	0
FCF1	ENSG00000119616	-0.0879581	-0.625875	0
USP15	ENSG00000135655	-0.0879228	-0.625334	0
SIVA1	ENSG00000184990	-0.0878905	-0.624839	0
PGRMC1	ENSG00000101856	-0.0878634	-0.624425	0
PMEL	ENSG00000185664	-0.0878549	-0.624295	0
PDXDC1	ENSG00000179889	-0.0878527	-0.624262	0
SLU7	ENSG00000164609	-0.0878187	-0.623742	0
SLC17A9	ENSG00000101194	-0.0878112	-0.623626	0
EIF4B	ENSG00000063046	-0.0877316	-0.622408	0
ORAI3	ENSG00000175938	-0.0877077	-0.622042	0
TCN2	ENSG00000185339	-0.0876904	-0.621778	0
UBE2R2	ENSG00000107341	-0.0876432	-0.621056	0
ACBD5	ENSG00000107897	-0.0876149	-0.620622	0
MED1	ENSG00000125686	-0.0875796	-0.620082	0
DDC8	ENSG00000178404	-0.0875396	-0.619469	0
CTDSP1	ENSG00000144579	-0.0874188	-0.617621	0
ARID1A	ENSG00000117713	-0.0874013	-0.617353	0
IL13RA1	ENSG00000131724	-0.0873581	-0.616692	1
IRF2BP2	ENSG00000168264	-0.0873466	-0.616515	0
SEC62	ENSG00000008952	-0.0872948	-0.615723	0
KDM4A	ENSG00000066135	-0.0872477	-0.615002	0
PNN	ENSG00000100941	-0.0872082	-0.614398	0
ISG20	ENSG00000172183	-0.0871483	-0.613481	0
HEG1	ENSG00000173706	-0.0871326	-0.61324	0
ARID3A	ENSG00000116017	-0.0871232	-0.613096	0
NABP1	ENSG00000173559	-0.0870965	-0.612689	0
DENND4B	ENSG00000198837	-0.0870942	-0.612653	0
HNRNPU	ENSG00000153187	-0.0870906	-0.612598	0
ITFG3	ENSG00000167930	-0.0870587	-0.612109	0
TRAM1	ENSG00000067167	-0.087039	-0.611809	0
NKIRAS2	ENSG00000168256	-0.0870384	-0.611799	0
HNRNPUL2	ENSG00000214753	-0.0870215	-0.61154	0
HERPUD2	ENSG00000122557	-0.0869559	-0.610536	0
SAP30BP	ENSG00000161526	-0.086948	-0.610416	0
A2M	ENSG00000175899	-0.0869281	-0.610112	0
COIL	ENSG00000121058	-0.0869143	-0.609899	0
USP48	ENSG00000090686	-0.0869066	-0.609782	0
LRCH4	ENSG00000077454	-0.0868857	-0.609462	0
VDAC1	ENSG00000213585	-0.0868804	-0.609381	0
SPG7	ENSG00000197912	-0.0868138	-0.608362	0
SERINC5	ENSG00000164300	-0.0868052	-0.608229	0
HSP90AB1	ENSG00000096384	-0.0867961	-0.60809	0
ACOT4	ENSG00000177465	-0.0867717	-0.607717	0
BRD1	ENSG00000100425	-0.0867539	-0.607445	0
ALOX15B	ENSG00000179593	-0.0867075	-0.606735	0
KCTD12	ENSG00000178695	-0.0866916	-0.606491	0
UBR4	ENSG00000127481	-0.0865853	-0.604864	0
RBMS1	ENSG00000153250	-0.0865768	-0.604735	0
ATP6V0A2	ENSG00000185344	-0.0864822	-0.603287	0
PHF12	ENSG00000109118	-0.0864044	-0.602097	0
TANGO6	ENSG00000103047	-0.0863694	-0.601561	0
SLC39A13	ENSG00000165915	-0.0863539	-0.601323	0
KCMF1	ENSG00000176407	-0.0863294	-0.600949	0
GAB3	ENSG00000160219	-0.0863056	-0.600585	0
NAA16	ENSG00000172766	-0.0862611	-0.599903	0
C17orf62	ENSG00000178927	-0.0862461	-0.599674	0
SRPR	ENSG00000182934	-0.0862368	-0.599531	0
DHX16	ENSG00000204560	-0.086229	-0.599412	0
ZRSR2	ENSG00000169249	-0.0862098	-0.599118	0
VPS11	ENSG00000160695	-0.0862053	-0.599049	0
PLEKHM1	ENSG00000225190	-0.0862037	-0.599025	0
IL15RA	ENSG00000134470	-0.0861338	-0.597954	1
GDF15	ENSG00000130513	-0.0861335	-0.59795	0
ERAP1	ENSG00000164307	-0.0860324	-0.596403	0
TMED4	ENSG00000158604	-0.0859898	-0.595751	0
CTR9	ENSG00000198730	-0.0859771	-0.595556	0
CBFB	ENSG00000067955	-0.0859767	-0.59555	0
LANCL2	ENSG00000132434	-0.0859449	-0.595063	0
TSC22D4	ENSG00000166925	-0.0858954	-0.594307	0
DHX29	ENSG00000067248	-0.0858933	-0.594274	0
TGS1	ENSG00000137574	-0.085874	-0.593979	0
RNF123	ENSG00000164068	-0.085831	-0.59332	0
VPS16	ENSG00000215305	-0.0857996	-0.592841	0
SMIM7	ENSG00000214046	-0.0857891	-0.592679	0
KAT5	ENSG00000172977	-0.0857852	-0.59262	0
CUL4A	ENSG00000139842	-0.0857673	-0.592345	0
MAN1B1	ENSG00000177239	-0.085741	-0.591943	0
RPL3	ENSG00000100316	-0.0857128	-0.591512	0
UHRF1BP1	ENSG00000065060	-0.0856957	-0.59125	0
RASA3	ENSG00000185989	-0.085691	-0.591177	0
RRP8	ENSG00000132275	-0.0856851	-0.591088	0
ZBTB21	ENSG00000173276	-0.0856131	-0.589986	0
ACOT8	ENSG00000101473	-0.0855685	-0.589304	0
ARHGAP27	ENSG00000159314	-0.0855247	-0.588633	0
MUM1	ENSG00000160953	-0.0855185	-0.588539	0
EIF2S2	ENSG00000125977	-0.0854985	-0.588231	0
TTF1	ENSG00000125482	-0.0854883	-0.588076	0
ITSN2	ENSG00000198399	-0.0854721	-0.587828	0
SIRPB2	ENSG00000196209	-0.08547	-0.587796	1
WTAP	ENSG00000146457	-0.0854677	-0.58776	0
TNFSF10	ENSG00000121858	-0.0854429	-0.587381	1
EIF2AK1	ENSG00000086232	-0.0853946	-0.586642	0
CYB5R4	ENSG00000065615	-0.0853881	-0.586543	0
EEF1D	ENSG00000104529	-0.0853723	-0.5863	0
BRAP	ENSG00000089234	-0.085365	-0.58619	0
JAKMIP2	ENSG00000176049	-0.0853479	-0.585927	0
CLUH	ENSG00000132361	-0.0851986	-0.583642	0
PPTC7	ENSG00000196850	-0.085163	-0.583098	0
DTX2	ENSG00000091073	-0.0850623	-0.581557	0
ABTB1	ENSG00000114626	-0.0849712	-0.580162	0
PDE4DIP	ENSG00000178104	-0.0848975	-0.579034	0
PI4KB	ENSG00000143393	-0.084862	-0.57849	0
AP1G2	ENSG00000213983	-0.0847304	-0.576477	0
GTF2A1	ENSG00000165417	-0.0847003	-0.576017	0
TSHZ1	ENSG00000179981	-0.0846778	-0.575672	0
HNRNPF	ENSG00000169813	-0.0846353	-0.575021	0
ZNF589	ENSG00000164048	-0.0846183	-0.574761	0
STK38	ENSG00000112079	-0.08458	-0.574175	0
RNF115	ENSG00000121848	-0.0845427	-0.573605	0
NAAA	ENSG00000138744	-0.084489	-0.572783	0
KHDRBS1	ENSG00000121774	-0.0844286	-0.571858	0
RGS19	ENSG00000171700	-0.0843926	-0.571308	0
BEX4	ENSG00000102409	-0.0843521	-0.570687	0
ITGB5	ENSG00000082781	-0.0843485	-0.570631	0
ATXN3	ENSG00000066427	-0.084338	-0.570471	0
SLC16A3	ENSG00000141526	-0.0842995	-0.569882	0
MAML2	ENSG00000184384	-0.0842864	-0.569681	0
C12orf49	ENSG00000111412	-0.0842628	-0.56932	0
XRN2	ENSG00000088930	-0.08422	-0.568665	0
MORC3	ENSG00000159256	-0.0841889	-0.56819	0
TBCD	ENSG00000141556	-0.084146	-0.567533	0
TMC8	ENSG00000167895	-0.084115	-0.567058	0
KDM4B	ENSG00000127663	-0.0841064	-0.566927	0
TCF7L2	ENSG00000148737	-0.0841059	-0.56692	0
UBE2Z	ENSG00000159202	-0.0840707	-0.56638	0
PRNP	ENSG00000171867	-0.084054	-0.566125	1
TMEM245	ENSG00000106771	-0.0840491	-0.56605	0
LAMTOR4	ENSG00000188186	-0.0840381	-0.565881	0
ATP5D	ENSG00000099624	-0.0840349	-0.565833	0
SERBP1	ENSG00000142864	-0.0840342	-0.565822	0
DICER1	ENSG00000100697	-0.0840323	-0.565793	0
PPP6R2	ENSG00000100239	-0.0840228	-0.565648	0
HNRNPR	ENSG00000125944	-0.0839885	-0.565122	0
RRP12	ENSG00000052749	-0.0839821	-0.565025	0
DKC1	ENSG00000130826	-0.0839439	-0.564441	0
MAP3K3	ENSG00000198909	-0.0839167	-0.564024	0
LTBP3	ENSG00000168056	-0.083887	-0.56357	0
SEPT2	ENSG00000168385	-0.0838671	-0.563265	0
B4GALT1	ENSG00000086062	-0.0838608	-0.563169	0
SIGLEC10	ENSG00000142512	-0.0838497	-0.562999	0
SIRT7	ENSG00000187531	-0.0838216	-0.562568	0
PLSCR1	ENSG00000188313	-0.0837369	-0.561272	0
EAF1	ENSG00000144597	-0.0837301	-0.561167	0
CNN2	ENSG00000064666	-0.0837158	-0.560949	0
EPS15L1	ENSG00000127527	-0.0836786	-0.56038	0
SERPINH1	ENSG00000149257	-0.0836623	-0.560131	0
SLC29A3	ENSG00000198246	-0.0836498	-0.559939	0
ALKBH7	ENSG00000125652	-0.0836488	-0.559925	0
OSBPL1A	ENSG00000141447	-0.0836414	-0.559811	0
SEC61A1	ENSG00000058262	-0.0836222	-0.559516	0
DDX42	ENSG00000198231	-0.0836037	-0.559233	0
KIF5B	ENSG00000170759	-0.0835996	-0.559171	0
OPA3	ENSG00000125741	-0.0835772	-0.558828	0
L3MBTL2	ENSG00000100395	-0.0835544	-0.558479	0
SAT1	ENSG00000130066	-0.0835187	-0.557932	0
MAF1	ENSG00000179632	-0.0835177	-0.557917	0
GPRIN3	ENSG00000185477	-0.0835079	-0.557767	0
ITSN1	ENSG00000205726	-0.0834742	-0.557251	0
ARHGAP9	ENSG00000123329	-0.0834305	-0.556583	0
CCAR1	ENSG00000060339	-0.0833341	-0.555108	0
HERC2	ENSG00000128731	-0.083274	-0.554187	0
NCR3LG1	ENSG00000188211	-0.0832731	-0.554174	0
CSNK2A1	ENSG00000101266	-0.0832508	-0.553832	0
PPARG	ENSG00000132170	-0.083249	-0.553806	0
MAP1LC3B2	ENSG00000171471	-0.08324	-0.553667	0
TSC1	ENSG00000165699	-0.0831984	-0.553031	0
MIIP	ENSG00000116691	-0.0831944	-0.55297	0
RECQL	ENSG00000004700	-0.0831752	-0.552676	0
SMAD2	ENSG00000175387	-0.0831524	-0.552326	0
CALU	ENSG00000128595	-0.0831432	-0.552187	0
WDR26	ENSG00000162923	-0.0831384	-0.552113	0
HECTD3	ENSG00000126107	-0.0831254	-0.551913	0
ATMIN	ENSG00000166454	-0.0830229	-0.550345	0
CKAP5	ENSG00000175216	-0.083016	-0.55024	0
CNP	ENSG00000173786	-0.0830136	-0.550202	0
ACOX1	ENSG00000161533	-0.0829618	-0.54941	0
FAM107B	ENSG00000065809	-0.082909	-0.548602	0
ESYT2	ENSG00000117868	-0.0828648	-0.547925	0
PYCARD	ENSG00000103490	-0.0828533	-0.547749	0
ADPRHL2	ENSG00000116863	-0.0828528	-0.547741	0
REXO1	ENSG00000079313	-0.0828464	-0.547644	0
RAB39A	ENSG00000179331	-0.0828051	-0.547012	0
RASGRP3	ENSG00000152689	-0.082804	-0.546995	0
CD46	ENSG00000117335	-0.0827914	-0.546801	1
CCM2	ENSG00000136280	-0.0827556	-0.546255	0
ZFP91-CNTF	ENSG00000255073	-0.0827333	-0.545913	0
SCRN1	ENSG00000136193	-0.082718	-0.545679	0
OGFOD1	ENSG00000087263	-0.0826723	-0.54498	0
STX16	ENSG00000124222	-0.0826307	-0.544343	0
SMCO4	ENSG00000166002	-0.0826231	-0.544226	0
PREX1	ENSG00000124126	-0.0826092	-0.544013	0
RNF13	ENSG00000082996	-0.0825539	-0.543168	0
SGPP2	ENSG00000163082	-0.0825488	-0.54309	0
MKNK1	ENSG00000079277	-0.0825223	-0.542683	0
NOP56	ENSG00000101361	-0.0824928	-0.542232	0
CSNK2A2	ENSG00000070770	-0.0824074	-0.540925	0
WDR18	ENSG00000065268	-0.0823747	-0.540425	0
PPIL2	ENSG00000100023	-0.0823613	-0.540219	0
NPL	ENSG00000135838	-0.0823036	-0.539336	0
MMGT1	ENSG00000169446	-0.0822547	-0.538587	0
PPID	ENSG00000171497	-0.0822394	-0.538354	0
NMT1	ENSG00000136448	-0.0821861	-0.537538	0
BTN3A2	ENSG00000186470	-0.0821487	-0.536967	0
OXSR1	ENSG00000172939	-0.0821314	-0.536701	0
KHNYN	ENSG00000100441	-0.0821265	-0.536626	0
FNIP1	ENSG00000217128	-0.0820008	-0.534703	0
RAB13	ENSG00000143545	-0.081966	-0.53417	0
ERBB2IP	ENSG00000112851	-0.0819617	-0.534104	0
IFIT3	ENSG00000119917	-0.0819414	-0.533793	0
SLAMF7	ENSG00000026751	-0.0818624	-0.532584	1
ABCC5	ENSG00000114770	-0.0818441	-0.532304	0
ARMC7	ENSG00000125449	-0.0818144	-0.53185	0
KIAA1429	ENSG00000164944	-0.081757	-0.530971	0
IFNGR1	ENSG00000027697	-0.0817536	-0.530919	1
UTP14A	ENSG00000156697	-0.0817297	-0.530554	0
SAP30L	ENSG00000164576	-0.081678	-0.529763	0
CRTAP	ENSG00000170275	-0.0816745	-0.529708	0
GALNT2	ENSG00000143641	-0.0816721	-0.529671	0
SIGLEC14	ENSG00000254415	-0.0816715	-0.529662	0
TCEB3	ENSG00000011007	-0.0816709	-0.529654	0
GORASP1	ENSG00000114745	-0.0816678	-0.529606	0
BCL9L	ENSG00000186174	-0.0816601	-0.529488	0
CTNS	ENSG00000040531	-0.0816588	-0.529468	0
ZNF830	ENSG00000198783	-0.081605	-0.528645	0
HDGF	ENSG00000143321	-0.0815277	-0.527462	0
PRKCSH	ENSG00000130175	-0.0815224	-0.52738	0
DNAJA2	ENSG00000069345	-0.0815016	-0.527063	0
PEA15	ENSG00000162734	-0.0814912	-0.526904	0
FAM91A1	ENSG00000176853	-0.0814687	-0.52656	0
CRTC3	ENSG00000140577	-0.08146	-0.526425	0
RNF19B	ENSG00000116514	-0.0814524	-0.52631	0
KIAA0141	ENSG00000081791	-0.081446	-0.526212	0
ZNF689	ENSG00000156853	-0.0814415	-0.526142	0
GRINA	ENSG00000178719	-0.0814254	-0.525896	0
ENTPD4	ENSG00000197217	-0.0812975	-0.523939	0
CITED2	ENSG00000164442	-0.0812887	-0.523804	0
NUCB1	ENSG00000104805	-0.0812811	-0.523689	0
WWC3	ENSG00000047644	-0.0812201	-0.522755	0
PDCD11	ENSG00000148843	-0.0812155	-0.522684	0
DOK2	ENSG00000147443	-0.0811982	-0.52242	0
UBE2Q2	ENSG00000140367	-0.0811236	-0.521277	0
HERC1	ENSG00000103657	-0.0811033	-0.520967	0
ARIH2	ENSG00000177479	-0.0811011	-0.520933	0
SETD7	ENSG00000145391	-0.0810979	-0.520884	0
LZTR1	ENSG00000099949	-0.081069	-0.520442	0
NFKBIB	ENSG00000104825	-0.0810483	-0.520126	0
MFAP1	ENSG00000140259	-0.0810136	-0.519595	0
CREM	ENSG00000095794	-0.0810134	-0.519591	0
BAIAP2	ENSG00000175866	-0.0809996	-0.51938	0
P2RX4	ENSG00000135124	-0.0809437	-0.518524	0
C1orf85	ENSG00000198715	-0.0809367	-0.518417	0
MAU2	ENSG00000129933	-0.080936	-0.518407	0
C19orf52	ENSG00000142444	-0.0808593	-0.517233	0
RNF44	ENSG00000146083	-0.08082	-0.516632	0
CCDC109B	ENSG00000005059	-0.0807887	-0.516153	0
KIAA0232	ENSG00000170871	-0.0807851	-0.516098	0
CCDC50	ENSG00000152492	-0.0807709	-0.51588	0
SELPLG	ENSG00000110876	-0.0807519	-0.515589	1
MZT2A	ENSG00000173272	-0.0806763	-0.514432	0
RBPJ	ENSG00000168214	-0.0806728	-0.514379	0
SAE1	ENSG00000142230	-0.0806142	-0.513481	0
UBE2D1	ENSG00000072401	-0.0805451	-0.512423	0
LRRK1	ENSG00000154237	-0.0805245	-0.512109	0
KIAA0947	ENSG00000164151	-0.080503	-0.511779	0
TSPYL1	ENSG00000189241	-0.0804923	-0.511615	0
ANKRD27	ENSG00000105186	-0.0804862	-0.511522	0
NFAT5	ENSG00000102908	-0.0804727	-0.511316	0
SDCCAG8	ENSG00000054282	-0.0804277	-0.510627	0
ABHD4	ENSG00000100439	-0.0804102	-0.51036	0
MARK3	ENSG00000075413	-0.0804072	-0.510313	0
LINC01010	ENSG00000236700	-0.0803992	-0.510191	0
KRT222	ENSG00000264058	-0.080378	-0.509867	0
CAMKK1	ENSG00000004660	-0.0801815	-0.50686	0
UBE3C	ENSG00000009335	-0.0801623	-0.506566	0
SF3B2	ENSG00000087365	-0.0801516	-0.506402	0
ATXN7L3B	ENSG00000253719	-0.0801348	-0.506145	0
ATXN1L	ENSG00000224470	-0.0801249	-0.505993	0
NEK7	ENSG00000151414	-0.0800627	-0.505041	0
IRF9	ENSG00000213928	-0.0800333	-0.504592	0
IARS2	ENSG00000067704	-0.0800247	-0.504461	0
PHF2	ENSG00000197724	-0.0800208	-0.5044	0
GAR1	ENSG00000109534	-0.0800122	-0.504269	0
TMPO	ENSG00000120802	-0.080005	-0.504159	0
DCAF10	ENSG00000122741	-0.0799885	-0.503906	0
SLC35F5	ENSG00000115084	-0.0799769	-0.503728	0
APPL1	ENSG00000157500	-0.0799761	-0.503716	0
COPB1	ENSG00000129083	-0.0799211	-0.502874	0
TBCB	ENSG00000105254	-0.0799146	-0.502774	0
PTGER4	ENSG00000171522	-0.0799005	-0.502559	0
ICK	ENSG00000112144	-0.0798982	-0.502524	0
STK40	ENSG00000196182	-0.0798692	-0.50208	0
HAUS8	ENSG00000131351	-0.0798323	-0.501515	0
NLRP3	ENSG00000162711	-0.0798254	-0.50141	0
SLC35C1	ENSG00000181830	-0.0797886	-0.500847	0
PTCHD3P1	ENSG00000224597	-0.0797533	-0.500305	0
BLOC1S6	ENSG00000104164	-0.0797293	-0.499939	0
HSPA14	ENSG00000187522	-0.0797119	-0.499673	0
ADA	ENSG00000196839	-0.0796907	-0.499348	0
VPS41	ENSG00000006715	-0.0796872	-0.499294	0
CHKB	ENSG00000100288	-0.0796705	-0.499039	0
NRBP1	ENSG00000115216	-0.0796595	-0.49887	0
PIAS1	ENSG00000033800	-0.0796321	-0.498451	0
FAF2	ENSG00000113194	-0.0795774	-0.497614	0
SPOP	ENSG00000121067	-0.0795589	-0.497331	0
APOL1	ENSG00000100342	-0.0794671	-0.495926	0
GRSF1	ENSG00000132463	-0.0794627	-0.495859	0
PIK3R5	ENSG00000141506	-0.0794494	-0.495655	0
B3GALT4	ENSG00000235863	-0.0794382	-0.495484	0
MGAT4B	ENSG00000161013	-0.0794362	-0.495453	0
OASL	ENSG00000135114	-0.0794258	-0.495294	0
CYP2S1	ENSG00000167600	-0.0794062	-0.494994	0
C11orf31	ENSG00000211450	-0.0793795	-0.494586	0
CYFIP1	ENSG00000068793	-0.0793761	-0.494534	0
TIFAB	ENSG00000255833	-0.079375	-0.494517	0
AATF	ENSG00000108270	-0.079317	-0.493629	0
VPS13D	ENSG00000048707	-0.0793027	-0.49341	0
CYB5R3	ENSG00000100243	-0.0792688	-0.492891	0
SYAP1	ENSG00000169895	-0.0792662	-0.492851	0
ACE	ENSG00000159640	-0.0792456	-0.492537	1
NUDCD3	ENSG00000015676	-0.07924	-0.49245	0
RBM42	ENSG00000126254	-0.0791851	-0.49161	0
MKL1	ENSG00000196588	-0.0791796	-0.491526	0
SLC31A1	ENSG00000136868	-0.0791507	-0.491083	0
ARMC6	ENSG00000105676	-0.0790911	-0.490171	0
MAFK	ENSG00000198517	-0.0790891	-0.490141	0
FMR1	ENSG00000102081	-0.0790758	-0.489938	0
NAA50	ENSG00000121579	-0.0790561	-0.489635	0
CALCOCO2	ENSG00000136436	-0.0790537	-0.489599	0
RFC1	ENSG00000035928	-0.0790413	-0.48941	0
MBD3	ENSG00000071655	-0.0789805	-0.488479	0
PSTPIP2	ENSG00000152229	-0.0789688	-0.4883	0
MFNG	ENSG00000100060	-0.0788869	-0.487046	0
DOK3	ENSG00000146094	-0.0788578	-0.486601	0
KIAA1430	ENSG00000164323	-0.0788517	-0.486508	0
SIGLEC5	ENSG00000268500	-0.0787484	-0.484926	1
HDAC2	ENSG00000196591	-0.07873	-0.484645	0
CTCF	ENSG00000102974	-0.0786974	-0.484147	0
DGCR2	ENSG00000070413	-0.0786883	-0.484008	0
SIGIRR	ENSG00000185187	-0.0786792	-0.483868	0
TNFAIP8L2	ENSG00000163154	-0.0786257	-0.483049	0
RANBP10	ENSG00000141084	-0.0785849	-0.482425	0
NOTCH1	ENSG00000148400	-0.0785621	-0.482076	0
ZNF622	ENSG00000173545	-0.0785368	-0.481689	0
RPL13	ENSG00000167526	-0.0784878	-0.480939	0
TFPT	ENSG00000105619	-0.0784775	-0.48078	0
SDSL	ENSG00000139410	-0.0784588	-0.480495	0
CTU1	ENSG00000142544	-0.0784492	-0.480348	0
KIAA0430	ENSG00000166783	-0.078422	-0.479932	0
NARS	ENSG00000134440	-0.0784177	-0.479866	0
MAN2C1	ENSG00000140400	-0.0783809	-0.479303	0
SOWAHC	ENSG00000198142	-0.0783625	-0.479021	0
HDAC6	ENSG00000094631	-0.0783532	-0.478878	0
THRA	ENSG00000126351	-0.0783498	-0.478827	0
DENR	ENSG00000139726	-0.078322	-0.478401	0
FKBP8	ENSG00000105701	-0.0782767	-0.477708	0
TROVE2	ENSG00000116747	-0.0782663	-0.477548	0
GGNBP2	ENSG00000005955	-0.0782425	-0.477185	0
EMR2	ENSG00000127507	-0.0782412	-0.477165	1
MARVELD1	ENSG00000155254	-0.0782383	-0.477121	0
AC147651.4	ENSG00000237181	-0.0782085	-0.476665	0
CNEP1R1	ENSG00000205423	-0.0781672	-0.476032	0
GM2A	ENSG00000196743	-0.0781396	-0.475609	0
PPP6R3	ENSG00000110075	-0.0781221	-0.475342	0
SLFN5	ENSG00000166750	-0.0781209	-0.475323	0
AP5Z1	ENSG00000242802	-0.0781052	-0.475084	0
BCAP29	ENSG00000075790	-0.0780861	-0.474792	0
TULP4	ENSG00000130338	-0.0780836	-0.474752	0
NR1H3	ENSG00000025434	-0.0780704	-0.474551	0
DAGLB	ENSG00000164535	-0.0780636	-0.474447	0
TSTA3	ENSG00000104522	-0.0780407	-0.474097	0
RBM10	ENSG00000182872	-0.0780242	-0.473844	0
TFCP2	ENSG00000135457	-0.0780182	-0.473752	0
CCNI	ENSG00000118816	-0.0780101	-0.473627	0
BAZ2A	ENSG00000076108	-0.0780041	-0.473536	0
UNC45A	ENSG00000140553	-0.0780013	-0.473494	0
NBN	ENSG00000104320	-0.0779904	-0.473327	0
BAZ1A	ENSG00000198604	-0.077978	-0.473137	0
GGA1	ENSG00000100083	-0.0779352	-0.472482	0
MED25	ENSG00000104973	-0.0779269	-0.472354	0
PNPLA4	ENSG00000006757	-0.0779075	-0.472058	0
CRCP	ENSG00000241258	-0.0778792	-0.471625	0
PTPN7	ENSG00000143851	-0.0778784	-0.471613	0
MED12	ENSG00000184634	-0.0778592	-0.471318	0
PSMA1	ENSG00000256206	-0.0778452	-0.471105	0
NAT10	ENSG00000135372	-0.077829	-0.470856	0
DCP1A	ENSG00000162290	-0.0778229	-0.470763	0
RBBP4	ENSG00000162521	-0.0778046	-0.470482	0
CCDC12	ENSG00000160799	-0.0777855	-0.470191	0
CLCN7	ENSG00000103249	-0.0777333	-0.469392	0
ACTR2	ENSG00000138071	-0.0776754	-0.468506	0
TNRC6B	ENSG00000100354	-0.0776557	-0.468204	0
FBXO16	ENSG00000214050	-0.0776444	-0.468032	0
CEBPD	ENSG00000221869	-0.0776428	-0.468007	0
RSF1	ENSG00000048649	-0.0776121	-0.467536	0
KIAA0247	ENSG00000100647	-0.0775609	-0.466754	0
SART3	ENSG00000075856	-0.0775222	-0.466161	0
CD40	ENSG00000101017	-0.0774965	-0.465767	1
PHF20	ENSG00000025293	-0.0774497	-0.465051	0
ZNF703	ENSG00000183779	-0.0774204	-0.464603	0
TAX1BP1	ENSG00000106052	-0.0774106	-0.464452	0
CSRP1	ENSG00000159176	-0.0773978	-0.464257	0
PPARA	ENSG00000186951	-0.077355	-0.463602	0
SEC31A	ENSG00000138674	-0.0773089	-0.462897	0
ENTPD6	ENSG00000197586	-0.0772843	-0.46252	0
LRPPRC	ENSG00000138095	-0.0772287	-0.461669	0
PRPF4	ENSG00000136875	-0.0772252	-0.461615	0
METTL14	ENSG00000145388	-0.0772124	-0.46142	0
FBXL5	ENSG00000118564	-0.0772107	-0.461394	0
HCST	ENSG00000126264	-0.077183	-0.46097	0
PI4K2A	ENSG00000155252	-0.0771631	-0.460666	0
RER1	ENSG00000157916	-0.0771433	-0.460362	0
ZNRD1	ENSG00000066379	-0.077141	-0.460328	0
GCNT2	ENSG00000111846	-0.0771324	-0.460195	0
MAP1LC3B	ENSG00000140941	-0.0771276	-0.460121	0
PIGS	ENSG00000087111	-0.0771068	-0.459803	0
MICU1	ENSG00000107745	-0.0771046	-0.45977	0
TMEM216	ENSG00000187049	-0.0770717	-0.459267	0
C21orf2	ENSG00000160226	-0.0770171	-0.45843	0
TBC1D2	ENSG00000095383	-0.0770125	-0.45836	0
TBC1D7	ENSG00000145979	-0.0769685	-0.457687	0
ESYT1	ENSG00000139641	-0.0769194	-0.456936	0
NASP	ENSG00000132780	-0.0769067	-0.456741	0
SETDB2	ENSG00000136169	-0.0768935	-0.456539	0
ARFGAP2	ENSG00000149182	-0.0768647	-0.456099	0
TCHP	ENSG00000139437	-0.0768243	-0.45548	0
BTBD6	ENSG00000184887	-0.0767818	-0.454829	0
WBP11	ENSG00000084463	-0.0767718	-0.454676	0
ELL2	ENSG00000118985	-0.0767599	-0.454495	0
AP3D1	ENSG00000065000	-0.0767223	-0.45392	0
FBXO9	ENSG00000112146	-0.0767114	-0.453752	0
MAZ	ENSG00000103495	-0.0766675	-0.45308	0
GTF3C5	ENSG00000148308	-0.0766637	-0.453022	0
GNL1	ENSG00000204590	-0.0766423	-0.452694	0
PRCP	ENSG00000137509	-0.0766421	-0.452692	0
SSH1	ENSG00000084112	-0.076617	-0.452307	0
CCDC6	ENSG00000108091	-0.076606	-0.452139	0
MED15	ENSG00000099917	-0.0765594	-0.451427	0
NIPA2	ENSG00000140157	-0.0765423	-0.451164	0
GSK3B	ENSG00000082701	-0.0765368	-0.451079	0
MAVS	ENSG00000088888	-0.0765367	-0.451078	0
RP1-17K7.2	ENSG00000254584	-0.076529	-0.450961	0
ITM2B	ENSG00000136156	-0.0765271	-0.450931	0
LCP1	ENSG00000136167	-0.0765196	-0.450816	0
MAST3	ENSG00000099308	-0.0765151	-0.450748	0
TMUB2	ENSG00000168591	-0.0765117	-0.450696	0
TMEM131	ENSG00000075568	-0.0765011	-0.450534	0
ZFPL1	ENSG00000162300	-0.0764971	-0.450473	0
PQLC1	ENSG00000122490	-0.0764795	-0.450203	0
ZMAT3	ENSG00000172667	-0.0764691	-0.450044	0
TRAPPC10	ENSG00000160218	-0.0764291	-0.449432	0
ZC3H6	ENSG00000188177	-0.0764013	-0.449006	0
NUBP2	ENSG00000095906	-0.0763459	-0.448158	0
[truncated: 5,000 more rows]
