# Supplementary material for: Single cell analysis reveals human cytomegalovirus drives latently infected cells towards an anergic-like monocyte state
Source: eLife. 2020 Jan 22;9:e52168. doi: 10.7554/eLife.52168 (PMC7039680; doi:10.7554/eLife.52168)
Supplement: Figure 6—source data 1. [file elife-52168-fig6-data1.xlsx]

## Sheet: Table S3
Figure 6- source data 1- DE analysis of RNA-seq on CD74high and CD74low cells
Gene	Gene Ensembl ID	Mean Expression	Log 2 Fold Change	-log10 p value	-log10 FDR
MMP9	ENSG00000100985	2731.3	1.13	23.94	20.6
CD74	ENSG00000019582	8495.59	0.91	22.79	19.75
IFI27	ENSG00000165949	741.54	1.46	20	17.13
HLA-DRB1	ENSG00000196126	1430.19	1.09	19.55	16.81
HLA-DPA1	ENSG00000231389	747.03	1.23	17.17	14.53
LGMN	ENSG00000100600	519.82	1.32	15.69	13.19
HLA-DPB1	ENSG00000223865	671.57	1.12	14.78	12.34
HLA-DRA	ENSG00000204287	530.69	1.05	11.55	9.25
CD81	ENSG00000110651	2209.16	0.73	11.19	8.93
LGALS1	ENSG00000100097	819.76	0.92	10.88	8.66
HAMP	ENSG00000105697	165.78	1.73	10.01	7.81
IGLL5	ENSG00000254709	161.98	9.35	9.86	7.7
CAPG	ENSG00000042493	1579.3	0.76	9.69	7.56
CTSD	ENSG00000117984	12869.4	0.59	9.51	7.4
C1QA	ENSG00000173372	105.89	1.84	8.85	6.76
APOBEC3A	ENSG00000128383	701.15	0.84	7.91	5.85
CD14	ENSG00000170458	2039.43	0.63	7.75	5.71
C1QB	ENSG00000173369	105.56	1.7	7.48	5.48
TNFSF13	ENSG00000161955	417.41	0.97	7.44	5.46
CDKN1A	ENSG00000124762	1090.72	-0.66	7.27	5.31
ACP2	ENSG00000134575	311.41	1.02	7.24	5.29
NR1H3	ENSG00000025434	314.99	0.97	7.21	5.29
LGALS3BP	ENSG00000108679	997.4	0.65	6.98	5.07
TUBA1B	ENSG00000123416	1051.71	0.71	6.88	5
MAP4K4	ENSG00000071054	175.79	-1.2	6.88	5
RASSF4	ENSG00000107551	392.15	0.86	6.69	4.83
TCN2	ENSG00000185339	341.12	0.88	6.47	4.62
CTSH	ENSG00000103811	1005.47	0.61	5.96	4.12
PLXND1	ENSG00000004399	601.34	0.68	5.83	4
UCP2	ENSG00000175567	280.29	0.88	5.75	3.94
TIFAB	ENSG00000255833	90.02	1.48	5.65	3.85
RNASE1	ENSG00000129538	489.74	1.57	5.57	3.79
STAB1	ENSG00000010327	230.97	0.95	5.5	3.72
CD4	ENSG00000010610	165.51	1.08	5.46	3.7
TUBA1A	ENSG00000167552	299.81	0.83	5.43	3.68
CTSL	ENSG00000135047	618.05	0.65	5.36	3.62
IFITM1	ENSG00000185885	723.19	0.61	5.23	3.5
HEXB	ENSG00000049860	185.52	-1.18	5.07	3.35
RPL28	ENSG00000108107	1052.34	0.56	4.96	3.26
P2RY6	ENSG00000171631	82.81	1.44	4.94	3.24
SYNGR2	ENSG00000108639	377.08	0.73	4.93	3.24
CTSC	ENSG00000109861	509.42	0.69	4.9	3.22
MICAL1	ENSG00000135596	407.38	0.7	4.88	3.21
PFN1	ENSG00000108518	595.93	0.77	4.87	3.21
CCL3	ENSG00000006075	649.53	0.65	4.82	3.17
PLXNA1	ENSG00000114554	245.64	0.84	4.63	2.99
ANXA6	ENSG00000197043	271.11	0.81	4.61	2.98
FBXW5	ENSG00000159069	410.85	0.67	4.52	2.9
HLA-DMB	ENSG00000242574	319.4	0.76	4.43	2.81
PSAP	ENSG00000197746	9403.87	0.39	4.37	2.76
FLNA	ENSG00000196924	1388.1	0.47	4.25	2.67
CD37	ENSG00000104894	1266.33	0.48	4.25	2.67
CD84	ENSG00000066294	165.21	0.96	4.2	2.62
OAZ2	ENSG00000180304	369.86	0.66	4.06	2.49
CTSB	ENSG00000164733	3142.91	0.4	4.04	2.48
ISG15	ENSG00000187608	4398.31	0.37	4	2.44
CALM3	ENSG00000160014	418.35	0.62	3.87	2.32
TSPAN4	ENSG00000214063	275.74	0.71	3.84	2.3
IL4I1	ENSG00000104951	570.25	0.57	3.8	2.26
OAS1	ENSG00000089127	823.54	0.48	3.75	2.23
GDF15	ENSG00000130513	88.11	-1.16	3.73	2.21
CTSZ	ENSG00000101160	692.83	0.63	3.7	2.19
HLA-DMA	ENSG00000204257	529.26	0.61	3.68	2.17
HCST	ENSG00000126264	372.87	0.64	3.62	2.11
ABI3	ENSG00000108798	145.75	0.92	3.6	2.1
GRN	ENSG00000030582	4674.62	0.36	3.58	2.09
FXYD6-FXYD2	ENSG00000255245	136.61	-0.95	3.56	2.08
ABHD12	ENSG00000100997	996.86	0.46	3.53	2.05
JUP	ENSG00000173801	364.09	0.62	3.5	2.03
GPNMB	ENSG00000136235	834.31	0.47	3.47	2
TKT	ENSG00000163931	1443.28	0.4	3.42	1.97
GAPDH	ENSG00000111640	996.47	0.43	3.42	1.97
P2RY11	ENSG00000244165	184.41	0.78	3.42	1.97
ATF5	ENSG00000169136	459.23	0.55	3.31	1.87
CD52	ENSG00000169442	421.37	-0.61	3.31	1.87
ARHGDIB	ENSG00000111348	696.63	0.47	3.3	1.87
MT2A	ENSG00000125148	337.45	0.63	3.29	1.87
ACTG1	ENSG00000184009	955.14	0.45	3.26	1.83
LAIR1	ENSG00000167613	246.37	0.68	3.24	1.82
AP1B1	ENSG00000100280	326.71	0.63	3.19	1.78
SLCO2B1	ENSG00000137491	112.44	0.97	3.19	1.78
MAN2B1	ENSG00000104774	777.61	0.46	3.15	1.75
TNFSF12	ENSG00000239697	147.17	0.81	3.11	1.71
ARRB2	ENSG00000141480	725.89	0.5	3.1	1.71
ANXA5	ENSG00000164111	301.4	-0.71	3.1	1.71
PPP2R4	ENSG00000119383	291.46	0.62	3.04	1.66
SLC29A3	ENSG00000198246	137.96	0.84	3.03	1.66
IFITM3	ENSG00000142089	3789.59	0.36	3.02	1.66
NAGK	ENSG00000124357	1169.14	0.4	3.02	1.66
H1FX	ENSG00000184897	355.39	-0.6	3.02	1.66
CMKLR1	ENSG00000174600	227.96	0.69	3.02	1.66
ARHGAP4	ENSG00000089820	200.05	0.68	2.93	1.57
RHOG	ENSG00000177105	618.51	0.45	2.92	1.57
KLF6	ENSG00000067082	890.28	0.41	2.88	1.54
SEMA6B	ENSG00000167680	97.87	0.94	2.88	1.54
DDAH2	ENSG00000213722	223.08	0.66	2.83	1.49
TNNT1	ENSG00000105048	99.69	0.92	2.78	1.45
SRSF11	ENSG00000116754	103.21	-0.89	2.75	1.43
VASH1	ENSG00000071246	88.79	0.98	2.75	1.43
FPR3	ENSG00000187474	153.43	0.75	2.74	1.42
LMNA	ENSG00000160789	428.56	0.49	2.71	1.4
C2	ENSG00000166278	173.42	0.69	2.69	1.38
NAGA	ENSG00000198951	99.06	0.89	2.69	1.38
TFEB	ENSG00000112561	365.63	0.56	2.66	1.35
MX1	ENSG00000157601	1555.98	0.38	2.65	1.35
NUPR1	ENSG00000176046	973.16	0.45	2.64	1.35
KIFC3	ENSG00000140859	131.04	0.77	2.63	1.34
ZYX	ENSG00000159840	819.25	0.4	2.6	1.32
MGLL	ENSG00000074416	807.36	0.39	2.6	1.32
CLIC1	ENSG00000213719	1270.02	0.42	2.59	1.32
AES	ENSG00000104964	562.98	0.43	2.59	1.32
WAS	ENSG00000015285	336.76	0.58	2.58	1.31
OAZ1	ENSG00000104904	2527.22	0.31	2.56	1.3
C3	ENSG00000125730	327.82	0.53	2.54	1.28
CD300A	ENSG00000167851	125.96	0.8	2.52	1.26
DNPH1	ENSG00000112667	313.17	0.53	2.49	1.24
IDH2	ENSG00000182054	268.12	0.56	2.49	1.24
PLOD3	ENSG00000106397	178.83	0.65	2.49	1.24
CECR1	ENSG00000093072	477.02	0.44	2.47	1.23
STAT1	ENSG00000115415	636.4	0.42	2.46	1.22
LILRB4	ENSG00000186818	1044.95	0.37	2.44	1.21
SEPT9	ENSG00000184640	676.37	0.39	2.44	1.21
ENG	ENSG00000106991	495.65	0.45	2.44	1.21
NEAT1	ENSG00000245532	720.66	-0.4	2.43	1.21
GAA	ENSG00000171298	530.86	0.43	2.43	1.21
RAC1	ENSG00000136238	357.03	0.48	2.43	1.21
RPS29	ENSG00000213741	156.78	-0.72	2.43	1.21
IFI35	ENSG00000068079	506.26	0.46	2.4	1.19
TNNI2	ENSG00000130598	112.34	0.81	2.4	1.19
AMICA1	ENSG00000160593	275.32	0.54	2.33	1.12
ARPC1B	ENSG00000130429	1234.44	0.33	2.31	1.11
CAPZB	ENSG00000077549	518.25	0.41	2.31	1.11
CHIT1	ENSG00000133063	107.9	0.78	2.3	1.11
RPS9	ENSG00000170889	431.33	0.44	2.28	1.09
PSMB10	ENSG00000205220	373.73	0.46	2.28	1.09
PYCARD	ENSG00000103490	181.01	0.7	2.28	1.09
B2M	ENSG00000166710	105.05	-1.92	2.28	1.09
MVP	ENSG00000013364	316.5	0.5	2.26	1.08
TOMM6	ENSG00000214736	103.42	-0.78	2.26	1.08
LST1	ENSG00000204482	501.85	0.41	2.22	1.05
PLEKHO1	ENSG00000023902	1329.39	0.34	2.21	1.04
DAK	ENSG00000149476	169.52	-0.63	2.21	1.04
TLE3	ENSG00000140332	139.57	0.69	2.21	1.04
PCK2	ENSG00000100889	108.1	0.77	2.2	1.03
LGALS2	ENSG00000100079	544.71	0.4	2.19	1.03
RNASET2	ENSG00000026297	457.4	0.43	2.19	1.03
SECTM1	ENSG00000141574	291.3	0.5	2.18	1.03
ARHGEF11	ENSG00000132694	245.74	0.53	2.18	1.03
KCNN4	ENSG00000104783	128.95	0.77	2.18	1.03
ATP13A1	ENSG00000105726	288.28	0.49	2.17	1.02
ZC3H13	ENSG00000123200	120.15	-0.72	2.16	1.02
SLC25A19	ENSG00000125454	102.14	0.78	2.16	1.02
CD22	ENSG00000012124	133.64	0.69	2.15	1.01
EHBP1L1	ENSG00000173442	528.26	0.39	2.13	1
TMSB10	ENSG00000034510	4600.39	0.26	2.12	0.98
MS4A7	ENSG00000166927	518.72	-0.4	2.11	0.98
TWF2	ENSG00000247596	369.4	0.45	2.11	0.98
EMILIN2	ENSG00000132205	426.23	0.43	2.09	0.96
OST4	ENSG00000228474	282.86	-0.52	2.09	0.96
KCNMA1	ENSG00000156113	125.01	0.69	2.08	0.96
TRIM47	ENSG00000132481	112.84	0.73	2.07	0.95
GNB2L1	ENSG00000204628	647.06	0.36	2.06	0.94
DEF6	ENSG00000023892	101.25	0.79	2.06	0.94
SCARB1	ENSG00000073060	371.5	0.43	2.03	0.92
HN1	ENSG00000189159	123.09	0.69	2.03	0.92
PLEC	ENSG00000178209	491.5	0.39	2.02	0.92
GNAI2	ENSG00000114353	2850.02	0.26	1.99	0.89
DDB1	ENSG00000167986	267.45	-0.5	1.98	0.88
SLC22A18	ENSG00000110628	178.71	0.57	1.98	0.88
HSP90B1	ENSG00000166598	133.72	-0.67	1.97	0.88
GLUL	ENSG00000135821	634.98	0.36	1.96	0.87
BLVRB	ENSG00000090013	404.25	0.44	1.96	0.87
NENF	ENSG00000117691	191.02	-0.55	1.96	0.87
MYL6	ENSG00000092841	1094.99	0.31	1.95	0.87
LGALS9	ENSG00000168961	1027.95	0.37	1.94	0.86
SCAMP2	ENSG00000140497	376.93	0.42	1.94	0.86
SDC4	ENSG00000124145	143.02	0.63	1.94	0.86
B4GALT1	ENSG00000086062	134.58	0.63	1.94	0.86
NINJ1	ENSG00000131669	1143.04	0.31	1.92	0.85
ITGB2	ENSG00000160255	2123.01	0.28	1.91	0.84
DNASE2	ENSG00000105612	418.69	0.39	1.91	0.84
ZBED1	ENSG00000214717	157.15	0.59	1.89	0.82
SIGLEC9	ENSG00000129450	105.22	0.69	1.87	0.81
VASP	ENSG00000125753	284.12	0.46	1.86	0.8
TOM1L2	ENSG00000175662	89.69	0.74	1.86	0.8
FOS	ENSG00000170345	344.68	0.42	1.85	0.79
RIN3	ENSG00000100599	277.8	0.45	1.85	0.79
NFKBIA	ENSG00000100906	342.73	0.42	1.83	0.78
TRPM2	ENSG00000142185	260.99	0.46	1.83	0.78
ALDH2	ENSG00000111275	267.98	0.52	1.82	0.77
PRKCD	ENSG00000163932	441.88	0.4	1.81	0.77
DUSP1	ENSG00000120129	200.27	0.51	1.81	0.77
HK3	ENSG00000160883	148.33	0.61	1.81	0.77
GALM	ENSG00000143891	118.33	0.66	1.81	0.77
MGAT1	ENSG00000131446	972.45	0.3	1.79	0.76
FKBP4	ENSG00000004478	199.68	-0.5	1.78	0.75
EMILIN1	ENSG00000138080	102.09	0.68	1.78	0.75
FTL	ENSG00000087086	10978.9	0.52	1.77	0.75
CCDC94	ENSG00000105248	94.53	0.72	1.77	0.75
IRF5	ENSG00000128604	471.58	0.37	1.76	0.73
TYROBP	ENSG00000011600	5584.61	0.23	1.75	0.73
SAT1	ENSG00000130066	514.98	0.36	1.75	0.73
SEMA4A	ENSG00000196189	178.84	0.58	1.75	0.73
RALGDS	ENSG00000160271	182.83	0.56	1.74	0.72
SLAMF7	ENSG00000026751	552.48	-0.34	1.73	0.72
MT-ND4	ENSG00000198886	232.61	0.51	1.73	0.72
ITGA5	ENSG00000161638	285.32	0.43	1.72	0.72
CDV3	ENSG00000091527	132.67	-0.63	1.72	0.72
HSPB1	ENSG00000106211	942.29	0.32	1.71	0.71
TMSB4X	ENSG00000205542	766.92	0.38	1.71	0.71
NDUFS7	ENSG00000115286	233.04	0.47	1.71	0.71
TNK2	ENSG00000061938	196.85	0.54	1.71	0.71
RNF24	ENSG00000101236	110.37	-0.66	1.7	0.7
MYEOV2	ENSG00000172428	121.78	-0.62	1.69	0.69
POLR2J	ENSG00000005075	104.28	-0.65	1.69	0.69
ADAM8	ENSG00000151651	255.46	0.45	1.68	0.69
GSN	ENSG00000148180	247.88	0.47	1.68	0.69
XPC	ENSG00000154767	124.15	-0.64	1.68	0.69
S100A9	ENSG00000163220	960.76	0.3	1.67	0.68
GGA2	ENSG00000103365	115.91	0.62	1.66	0.68
PNKD	ENSG00000127838	387.38	0.38	1.65	0.67
MYO1C	ENSG00000197879	138.75	0.6	1.65	0.67
SGK1	ENSG00000118515	248.86	0.47	1.64	0.66
DHX58	ENSG00000108771	246.58	0.44	1.64	0.66
WDR83OS	ENSG00000105583	187.29	-0.52	1.64	0.66
TBCB	ENSG00000105254	113	0.64	1.64	0.66
FBP1	ENSG00000165140	525.86	0.33	1.62	0.65
ATG7	ENSG00000197548	141.5	0.56	1.62	0.65
HDAC6	ENSG00000094631	97.61	0.65	1.61	0.65
COLGALT1	ENSG00000130309	734.95	0.34	1.61	0.64
TUBB	ENSG00000196230	203.8	0.47	1.61	0.64
HCK	ENSG00000101336	988.28	0.28	1.6	0.64
BAIAP2	ENSG00000175866	86.67	0.68	1.6	0.64
CFL1	ENSG00000172757	2248.24	0.27	1.59	0.64
SLC35F6	ENSG00000213699	124.27	0.59	1.59	0.64
CYBA	ENSG00000051523	1373.07	0.29	1.58	0.63
EIF4A1	ENSG00000161960	655.71	0.32	1.58	0.62
U2AF1	ENSG00000160201	290.22	0.4	1.54	0.59
PTMS	ENSG00000159335	197.02	0.47	1.54	0.59
ALKBH7	ENSG00000125652	104.2	0.63	1.53	0.59
AKT1S1	ENSG00000204673	479.37	0.33	1.53	0.58
MIR142	ENSG00000265206	165.39	0.53	1.53	0.58
FKBP1A	ENSG00000088832	147.46	0.53	1.53	0.58
COX4I1	ENSG00000131143	907.88	0.27	1.52	0.58
BCL2L1	ENSG00000171552	226.81	0.43	1.52	0.58
ZMIZ2	ENSG00000122515	204.2	0.47	1.52	0.58
PLAU	ENSG00000122861	103.58	0.61	1.52	0.58
LILRB2	ENSG00000131042	451.44	0.34	1.51	0.58
AKR1A1	ENSG00000117448	377.81	0.37	1.51	0.58
ISG20	ENSG00000172183	195.51	0.47	1.51	0.57
PTGES2	ENSG00000148334	146.62	0.54	1.5	0.57
WDR1	ENSG00000071127	392.2	0.37	1.49	0.56
GSTO1	ENSG00000148834	160.29	0.49	1.49	0.56
MYBPH	ENSG00000133055	99.06	-0.62	1.49	0.56
SCO2	ENSG00000130489	394.21	0.36	1.47	0.55
SLC37A2	ENSG00000134955	109.43	0.6	1.47	0.55
C8orf82	ENSG00000213563	90.95	0.64	1.47	0.55
SGSH	ENSG00000181523	86.25	0.68	1.47	0.55
GRINA	ENSG00000178719	816.33	0.28	1.44	0.52
OSCAR	ENSG00000170909	181.2	0.49	1.44	0.52
H1F0	ENSG00000189060	144.59	-0.5	1.44	0.52
GSTP1	ENSG00000084207	748	0.32	1.43	0.52
PARP12	ENSG00000059378	533.91	0.3	1.43	0.52
MCL1	ENSG00000143384	153.4	0.51	1.43	0.52
RP11-802E16.3	ENSG00000255031	645.66	0.29	1.42	0.52
ENO1	ENSG00000074800	918.39	0.3	1.41	0.5
MPP1	ENSG00000130830	203.3	0.44	1.41	0.5
FAM65A	ENSG00000039523	258.34	0.41	1.4	0.5
BSCL2	ENSG00000168000	223.99	0.42	1.4	0.5
GMIP	ENSG00000089639	204.73	0.43	1.4	0.5
APOC1	ENSG00000130208	946.03	0.26	1.38	0.49
PILRA	ENSG00000085514	556.32	0.3	1.38	0.48
NCKAP1L	ENSG00000123338	285.96	0.37	1.38	0.48
ARAP1	ENSG00000186635	665.88	0.28	1.37	0.48
CD44	ENSG00000026508	322.47	-0.36	1.37	0.48
MYL12A	ENSG00000101608	129.1	0.53	1.37	0.48
ATP5A1	ENSG00000152234	102.36	-0.59	1.37	0.48
RNH1	ENSG00000023191	482.74	0.3	1.36	0.48
SHISA5	ENSG00000164054	300.94	-0.37	1.36	0.48
S100A11	ENSG00000163191	2420.93	0.45	1.36	0.47
DDX24	ENSG00000089737	143.91	-0.52	1.36	0.47
STAT2	ENSG00000170581	208.21	-0.42	1.35	0.47
SDS	ENSG00000135094	125.69	0.52	1.35	0.47
NRD1	ENSG00000078618	112.88	-0.54	1.35	0.47
FCER1G	ENSG00000158869	102.44	-0.59	1.35	0.47
CIR1	ENSG00000138433	272.68	0.38	1.34	0.47
RHBDF2	ENSG00000129667	220.73	0.41	1.34	0.47
NUB1	ENSG00000013374	127.09	0.51	1.34	0.47
PREX1	ENSG00000124126	305.71	0.35	1.33	0.46
TMEM138	ENSG00000149483	283	-0.37	1.33	0.46
ST14	ENSG00000149418	222.23	0.41	1.33	0.46
TOR3A	ENSG00000186283	109.53	0.58	1.33	0.46
ERICH1	ENSG00000104714	82.97	-0.62	1.33	0.46
ABR	ENSG00000159842	590.21	0.28	1.32	0.46
SELPLG	ENSG00000110876	483.51	0.3	1.32	0.46
TMBIM1	ENSG00000135926	260.91	0.38	1.32	0.46
STUB1	ENSG00000103266	228.45	-0.4	1.32	0.46
IL1RN	ENSG00000136689	173.05	-0.5	1.32	0.46
UBA7	ENSG00000182179	156.81	0.48	1.32	0.46
CREBBP	ENSG00000005339	84.92	-0.61	1.32	0.46
ARPC4	ENSG00000241553	241.38	0.39	1.31	0.46
PLCB2	ENSG00000137841	238.33	0.41	1.31	0.46
RELB	ENSG00000104856	178.26	0.44	1.31	0.46
CMIP	ENSG00000153815	96.91	0.61	1.31	0.46
ACAA1	ENSG00000060971	157.18	0.46	1.3	0.46
FDPS	ENSG00000160752	98.39	0.57	1.3	0.46
SLC15A3	ENSG00000110446	1003.27	0.29	1.29	0.45
TSPO	ENSG00000100300	760.06	0.27	1.29	0.44
MAP1S	ENSG00000130479	106.04	0.54	1.29	0.44
NUCB1	ENSG00000104805	391.74	0.35	1.28	0.44
BRD4	ENSG00000141867	315.23	-0.35	1.28	0.44
PLA2G15	ENSG00000103066	84.62	0.61	1.28	0.44
MARCKS	ENSG00000155130	585.89	0.31	1.27	0.44
COTL1	ENSG00000103187	370.6	0.33	1.27	0.44
SUN2	ENSG00000100242	252.97	-0.37	1.27	0.44
TRPV2	ENSG00000187688	133.11	0.48	1.27	0.44
EGLN2	ENSG00000269858	156.59	0.48	1.27	0.43
HSP90AA1	ENSG00000080824	199.12	-0.41	1.26	0.43
RAB5C	ENSG00000108774	383.11	0.32	1.25	0.43
WASF2	ENSG00000158195	294.63	0.34	1.25	0.43
ALAS1	ENSG00000023330	237.22	0.37	1.25	0.43
SH3BP2	ENSG00000087266	210.21	0.4	1.25	0.43
SLC27A1	ENSG00000130304	199.93	0.4	1.25	0.43
ARRDC1	ENSG00000197070	193.63	0.41	1.25	0.43
CLN6	ENSG00000128973	155.18	0.49	1.25	0.43
SOD1	ENSG00000142168	118.91	0.53	1.25	0.43
HAGH	ENSG00000063854	193.45	-0.41	1.24	0.43
INO80E	ENSG00000169592	83.27	0.6	1.24	0.43
RAB13	ENSG00000143545	390.04	-0.33	1.23	0.41
CAMKK2	ENSG00000110931	110.31	0.53	1.23	0.41
POLR2L	ENSG00000177700	276.81	-0.36	1.22	0.41
ISCU	ENSG00000136003	249.84	-0.36	1.22	0.41
MBOAT7	ENSG00000125505	219.59	-0.38	1.22	0.41
YPEL3	ENSG00000090238	182.59	-0.41	1.22	0.41
CCDC88B	ENSG00000168071	138.51	-0.47	1.22	0.41
NOL7	ENSG00000225921	93.62	-0.56	1.22	0.41
PGD	ENSG00000142657	729.06	0.31	1.21	0.41
HEXA	ENSG00000213614	579.97	0.28	1.21	0.41
MRPL40	ENSG00000185608	120.49	0.49	1.21	0.41
HIST1H4C	ENSG00000197061	89.14	-0.62	1.21	0.41
HMOX1	ENSG00000100292	372.17	0.32	1.19	0.39
HK1	ENSG00000156515	124.1	0.48	1.19	0.39
GNA15	ENSG00000060558	109.09	0.52	1.19	0.39
ITGAX	ENSG00000140678	495	0.27	1.18	0.39
FMNL1	ENSG00000184922	446.52	0.29	1.18	0.39
C17orf62	ENSG00000178927	324.4	0.33	1.18	0.39
CAPN1	ENSG00000014216	281.79	0.34	1.18	0.39
PLOD1	ENSG00000083444	189.02	0.4	1.18	0.39
ATP5B	ENSG00000110955	122.64	-0.48	1.18	0.39
ANXA2	ENSG00000182718	998.39	0.28	1.17	0.38
TNFAIP2	ENSG00000185215	708.83	0.26	1.17	0.38
TNS1	ENSG00000079308	136.4	0.48	1.17	0.38
MAST3	ENSG00000099308	90.91	0.54	1.17	0.38
RBM10	ENSG00000182872	119.96	-0.48	1.16	0.38
DERL1	ENSG00000136986	83.3	0.57	1.16	0.38
CD68	ENSG00000129226	2543.13	0.19	1.15	0.37
HSD3B7	ENSG00000099377	306.5	0.32	1.15	0.37
BAG1	ENSG00000107262	82.92	0.58	1.14	0.37
RPS19	ENSG00000105372	1485.52	-0.22	1.14	0.36
PRPF38B	ENSG00000134186	162.87	-0.41	1.14	0.36
APOE	ENSG00000130203	2442.24	0.41	1.13	0.36
CST3	ENSG00000101439	1284.88	0.21	1.13	0.36
CCM2	ENSG00000136280	213.77	0.38	1.13	0.36
COMT	ENSG00000093010	484.42	0.28	1.12	0.35
ARHGAP30	ENSG00000186517	382.51	0.3	1.12	0.35
CORO1B	ENSG00000172725	324.14	0.31	1.12	0.35
NCOR2	ENSG00000196498	258.52	0.37	1.12	0.35
GNAS	ENSG00000087460	761.78	-0.24	1.11	0.35
TUBB4B	ENSG00000188229	180.19	0.39	1.11	0.34
SMS	ENSG00000102172	84.05	0.56	1.11	0.34
ELOVL1	ENSG00000066322	237.75	0.34	1.1	0.34
CAPNS1	ENSG00000126247	571.11	0.25	1.1	0.33
IER5L	ENSG00000188483	278.12	0.34	1.1	0.33
PRRC2C	ENSG00000117523	552.78	-0.25	1.09	0.33
BBC3	ENSG00000105327	110.29	-0.49	1.09	0.33
KIAA0930	ENSG00000100364	1360.97	0.22	1.08	0.32
TAP1	ENSG00000168394	502.9	0.26	1.08	0.32
PSME1	ENSG00000092010	267.15	0.32	1.08	0.32
ST3GAL5	ENSG00000115525	137.99	0.43	1.08	0.32
YTHDC1	ENSG00000083896	88	-0.54	1.08	0.32
PTMA	ENSG00000187514	447.7	-0.29	1.07	0.32
CNN2	ENSG00000064666	264.95	0.34	1.07	0.32
NECAP2	ENSG00000157191	180.14	0.38	1.07	0.32
RHBDD2	ENSG00000005486	144.72	-0.41	1.07	0.32
VPS18	ENSG00000104142	133.35	0.44	1.07	0.32
NUDT14	ENSG00000183828	91.53	0.52	1.07	0.32
RP4-583P15.15	ENSG00000273154	90.56	0.52	1.07	0.32
ZFP36L2	ENSG00000152518	355.94	0.32	1.06	0.32
ITPK1	ENSG00000100605	213.55	0.36	1.06	0.32
TMEM176B	ENSG00000106565	1119.11	0.23	1.06	0.31
VIM	ENSG00000026025	1103.75	0.22	1.06	0.31
LYN	ENSG00000254087	518.52	0.26	1.05	0.31
STX4	ENSG00000103496	371.99	0.28	1.05	0.31
OGDH	ENSG00000105953	165.28	0.39	1.05	0.31
MTDH	ENSG00000147649	164.75	-0.42	1.05	0.31
SEC61B	ENSG00000106803	142.55	0.42	1.05	0.31
TMEM63A	ENSG00000196187	127.36	0.43	1.05	0.31
GRB2	ENSG00000177885	1012.09	0.2	1.04	0.31
RABAC1	ENSG00000105404	296.04	0.31	1.04	0.31
UBB	ENSG00000170315	258.49	-0.33	1.04	0.31
CYB5R3	ENSG00000100243	225.56	0.34	1.04	0.31
SCAF11	ENSG00000139218	116.27	-0.46	1.04	0.31
POLE4	ENSG00000115350	90.37	-0.51	1.04	0.31
MIIP	ENSG00000116691	301.72	0.3	1.03	0.31
LAT2	ENSG00000086730	177.54	0.38	1.03	0.31
IFI30	ENSG00000216490	14075	0.4	1.03	0.3
IL2RG	ENSG00000147168	159.76	0.4	1.03	0.3
IQSEC1	ENSG00000144711	151.77	0.4	1.02	0.3
DOK1	ENSG00000115325	136.13	0.42	1.02	0.3
GSS	ENSG00000100983	117.49	0.46	1.02	0.3
CTSA	ENSG00000064601	1113.72	0.21	1.01	0.29
FGR	ENSG00000000938	1032.08	0.21	1.01	0.29
CSF1R	ENSG00000182578	535.83	0.25	1.01	0.29
BRD2	ENSG00000204256	396.66	-0.29	1.01	0.29
SHKBP1	ENSG00000160410	457.58	0.25	1	0.29
CALM1	ENSG00000198668	288.11	0.3	1	0.29
RRP7A	ENSG00000189306	254.21	-0.33	1	0.29
RNF220	ENSG00000187147	230.61	-0.35	1	0.29
ZNHIT1	ENSG00000106400	227.88	-0.33	1	0.29
PTGIR	ENSG00000160013	187.13	0.36	1	0.29
ZMIZ1-AS1	ENSG00000224596	146.01	-0.4	1	0.29
GALNT6	ENSG00000139629	143.42	0.4	1	0.29
POLR2A	ENSG00000181222	107.82	-0.47	1	0.29
C1orf85	ENSG00000198715	144.9	0.4	0.99	0.29
EDF1	ENSG00000107223	501.67	0.25	0.99	0.28
CD97	ENSG00000123146	229.03	0.34	0.99	0.28
CDIPT	ENSG00000103502	210.97	-0.35	0.99	0.28
DTX2	ENSG00000091073	144.45	0.39	0.99	0.28
ARPC3	ENSG00000111229	359.69	0.27	0.98	0.28
DOK3	ENSG00000146094	290.64	0.3	0.98	0.28
RRAS	ENSG00000126458	276.79	0.3	0.98	0.28
RXRA	ENSG00000186350	256.15	0.32	0.98	0.28
DEK	ENSG00000124795	131.87	-0.43	0.98	0.28
SLAMF8	ENSG00000158714	422.17	0.3	0.97	0.28
PSMA7	ENSG00000101182	379.06	0.27	0.97	0.28
RP11-691N7.6	ENSG00000254732	364.14	0.29	0.97	0.28
EIF6	ENSG00000242372	169.82	0.38	0.97	0.28
ILK	ENSG00000166333	140.03	0.41	0.97	0.28
WDR13	ENSG00000101940	118.42	0.44	0.97	0.28
NOTCH1	ENSG00000148400	118.12	0.43	0.97	0.28
UBE2Z	ENSG00000159202	116.27	0.43	0.97	0.28
UBE2G2	ENSG00000184787	111.71	-0.44	0.97	0.28
NFE2L1	ENSG00000082641	88.23	0.48	0.97	0.28
CNP	ENSG00000173786	223	0.32	0.96	0.28
TYMP	ENSG00000025708	2593.92	0.17	0.96	0.27
PVRL2	ENSG00000130202	165.12	0.38	0.96	0.27
MKNK1	ENSG00000079277	119.89	0.44	0.96	0.27
ETV6	ENSG00000139083	104.22	0.46	0.96	0.27
CD63	ENSG00000135404	1943.03	0.19	0.95	0.27
RPS11	ENSG00000142534	823.49	0.22	0.95	0.27
TBC1D2	ENSG00000095383	444.2	-0.27	0.95	0.27
IMPDH1	ENSG00000106348	278.07	0.31	0.95	0.27
EVA1B	ENSG00000142694	190.37	0.34	0.95	0.27
ATP2A3	ENSG00000074370	158.47	-0.37	0.95	0.27
CYFIP1	ENSG00000068793	118.3	0.42	0.95	0.27
RELT	ENSG00000054967	111.35	0.44	0.95	0.27
DHX34	ENSG00000134815	109.28	-0.44	0.95	0.27
CHKA	ENSG00000110721	86.51	0.48	0.95	0.27
DPP7	ENSG00000176978	551.76	0.23	0.94	0.27
PIK3R5	ENSG00000141506	190.75	0.35	0.94	0.27
RILPL2	ENSG00000150977	144.69	0.4	0.94	0.27
MRPS25	ENSG00000131368	88.48	0.5	0.94	0.27
RAB4B	ENSG00000167578	126.94	0.41	0.93	0.27
CORO7	ENSG00000262246	167.81	0.35	0.93	0.26
FNBP1	ENSG00000187239	121.82	0.42	0.93	0.26
ARHGEF10L	ENSG00000074964	338.65	0.28	0.92	0.26
RPL36AL	ENSG00000165502	281.52	0.29	0.92	0.26
GDI1	ENSG00000203879	226.29	-0.32	0.92	0.26
MRPS21	ENSG00000187145	125.55	0.4	0.92	0.26
SLC12A7	ENSG00000113504	125.05	0.41	0.92	0.26
FXR2	ENSG00000129245	100.36	-0.47	0.92	0.26
C9orf78	ENSG00000136819	95.89	-0.45	0.92	0.26
DOCK2	ENSG00000134516	95.23	0.46	0.92	0.26
ACTB	ENSG00000075624	680.41	0.23	0.91	0.25
VPS51	ENSG00000149823	137.5	0.38	0.9	0.25
RPL37	ENSG00000145592	240.74	0.34	0.9	0.24
BIN2	ENSG00000110934	138.75	0.38	0.9	0.24
CCDC92	ENSG00000119242	96.87	0.47	0.9	0.24
SIGLEC1	ENSG00000088827	2003.88	0.18	0.89	0.24
ATG16L2	ENSG00000168010	303.3	-0.28	0.89	0.24
LASP1	ENSG00000002834	244.6	0.3	0.89	0.24
MAPKAPK2	ENSG00000162889	236.24	0.31	0.89	0.24
JUNB	ENSG00000171223	166.11	0.38	0.89	0.24
CUL9	ENSG00000112659	87.75	0.5	0.89	0.24
CHCHD10	ENSG00000250479	716.04	0.43	0.88	0.23
PML	ENSG00000140464	248.11	0.29	0.88	0.23
CDK2AP2	ENSG00000167797	136.89	-0.39	0.88	0.23
RPS2	ENSG00000140988	258.09	-0.3	0.87	0.23
ARRB1	ENSG00000137486	266.49	0.28	0.87	0.22
TNS3	ENSG00000136205	247.8	0.29	0.87	0.22
RBM23	ENSG00000100461	91.11	-0.45	0.87	0.22
BTG1	ENSG00000133639	89.19	-0.47	0.87	0.22
TPT1	ENSG00000133112	530.18	0.22	0.86	0.22
SDF4	ENSG00000078808	367.24	-0.25	0.86	0.22
MAP3K11	ENSG00000173327	323.43	0.27	0.86	0.22
MYO1G	ENSG00000136286	285.87	0.27	0.86	0.22
USP4	ENSG00000114316	141.57	-0.36	0.86	0.22
EIF3A	ENSG00000107581	133.22	-0.38	0.86	0.22
SNX8	ENSG00000106266	173.54	0.33	0.85	0.22
BCL3	ENSG00000069399	145.12	0.36	0.85	0.22
SDSL	ENSG00000139410	134.25	-0.37	0.85	0.22
VAC14	ENSG00000103043	116.77	0.39	0.85	0.22
SUPT4H1	ENSG00000213246	160.26	-0.34	0.85	0.21
YY1	ENSG00000100811	114.29	-0.39	0.85	0.21
MALAT1	ENSG00000251562	2366.07	-0.19	0.84	0.21
SH3BP1	ENSG00000100092	301.71	0.26	0.84	0.21
BSG	ENSG00000172270	206.28	-0.33	0.84	0.21
CENPB	ENSG00000125817	177.91	0.33	0.84	0.21
MTMR14	ENSG00000163719	153.57	0.37	0.84	0.21
DDX23	ENSG00000174243	139.09	-0.37	0.84	0.21
PTPRA	ENSG00000132670	123.29	-0.38	0.84	0.21
NUBP1	ENSG00000103274	109.94	0.4	0.84	0.21
AAMP	ENSG00000127837	95.7	-0.45	0.84	0.21
SIRPA	ENSG00000198053	600.3	0.2	0.83	0.21
NDUFA11	ENSG00000174886	258.07	0.28	0.83	0.21
TMEM160	ENSG00000130748	242.69	0.29	0.83	0.21
BCKDK	ENSG00000103507	234.71	-0.32	0.83	0.21
FARSA	ENSG00000179115	196.41	-0.31	0.83	0.21
FXYD5	ENSG00000089327	967.59	0.18	0.82	0.21
PDXK	ENSG00000160209	602.67	0.21	0.82	0.21
OAS3	ENSG00000111331	273.44	0.27	0.82	0.21
GAK	ENSG00000178950	214.63	-0.3	0.82	0.21
HIGD2A	ENSG00000146066	159.43	0.34	0.82	0.21
PDPK1	ENSG00000140992	101.24	-0.41	0.82	0.21
OTOA	ENSG00000155719	89.46	0.46	0.82	0.21
SASH3	ENSG00000122122	312.8	0.26	0.82	0.2
SMG5	ENSG00000198952	206.95	-0.31	0.82	0.2
DNMT1	ENSG00000130816	164.51	0.32	0.81	0.2
ASPSCR1	ENSG00000169696	112.84	0.39	0.81	0.2
RABGGTA	ENSG00000100949	99.97	0.41	0.81	0.2
IRF7	ENSG00000185507	1433.45	0.16	0.8	0.19
TTYH3	ENSG00000136295	290.45	0.27	0.8	0.19
RPS6KA1	ENSG00000117676	289.2	-0.26	0.8	0.19
GCHFR	ENSG00000137880	192.03	-0.3	0.8	0.19
SLC25A1	ENSG00000100075	187.61	0.31	0.8	0.19
PDAP1	ENSG00000106244	177.72	-0.31	0.8	0.19
MAP4	ENSG00000047849	145.6	0.34	0.8	0.19
AOAH	ENSG00000136250	106.75	0.41	0.8	0.19
DDX27	ENSG00000124228	99.49	-0.41	0.8	0.19
SNHG12	ENSG00000197989	83.19	0.44	0.8	0.19
LITAF	ENSG00000189067	279.98	0.26	0.79	0.19
MIDN	ENSG00000167470	158.91	0.33	0.79	0.19
CDC42EP1	ENSG00000128283	148.99	0.33	0.79	0.19
PINK1	ENSG00000158828	137.22	-0.36	0.79	0.19
TAP2	ENSG00000204267	116.82	0.38	0.79	0.19
MLST8	ENSG00000167965	115.24	0.37	0.79	0.19
GM2A	ENSG00000196743	1358.11	0.2	0.78	0.19
CSTB	ENSG00000160213	1835.79	0.16	0.78	0.18
CTD-2545G14.7	ENSG00000262526	839.01	-0.18	0.78	0.18
MRPL27	ENSG00000108826	139.87	0.34	0.78	0.18
TP53I11	ENSG00000175274	97.47	0.41	0.78	0.18
RAB7A	ENSG00000075785	480.72	0.21	0.77	0.18
CRIP1	ENSG00000257341	245.04	0.27	0.77	0.18
SURF4	ENSG00000148248	212.29	0.28	0.77	0.18
ACIN1	ENSG00000100813	192.65	-0.3	0.77	0.18
RNF181	ENSG00000168894	190.97	-0.3	0.77	0.18
CBR1	ENSG00000159228	174.47	0.32	0.77	0.18
BUD31	ENSG00000106245	136.59	-0.34	0.77	0.18
HS1BP3	ENSG00000118960	98.39	0.39	0.77	0.18
NRP2	ENSG00000118257	85.9	0.42	0.77	0.18
CSK	ENSG00000103653	464.66	0.23	0.76	0.18
SREBF1	ENSG00000072310	172.66	0.3	0.76	0.18
RGS10	ENSG00000148908	125.35	0.35	0.76	0.18
AC174470.1	ENSG00000215621	88.94	-0.42	0.76	0.18
CHI3L1	ENSG00000133048	3315.8	0.15	0.76	0.17
SLC38A7	ENSG00000103042	167.02	0.32	0.76	0.17
CLPTM1	ENSG00000104853	148.13	-0.33	0.76	0.17
SQSTM1	ENSG00000161011	1869.71	0.15	0.75	0.17
POU2F2	ENSG00000028277	767.89	-0.18	0.75	0.17
ADRBK1	ENSG00000173020	359.64	-0.23	0.75	0.17
CSNK1G2	ENSG00000133275	218.29	0.27	0.75	0.17
AP2A2	ENSG00000183020	141.58	0.33	0.75	0.17
DCXR	ENSG00000169738	97.19	0.39	0.75	0.17
REEP4	ENSG00000168476	83.22	0.46	0.75	0.17
H2AFY	ENSG00000113648	576.18	0.19	0.74	0.17
AGAP3	ENSG00000133612	528.83	0.2	0.74	0.17
TRIM28	ENSG00000130726	314.88	0.24	0.74	0.17
RALY	ENSG00000125970	225.57	0.27	0.74	0.17
CTBP1	ENSG00000159692	199.27	0.29	0.74	0.17
OAS2	ENSG00000111335	189.89	-0.29	0.74	0.17
CHD2	ENSG00000173575	184.35	-0.31	0.74	0.17
DOK2	ENSG00000147443	182.63	0.33	0.74	0.17
C19orf53	ENSG00000104979	162.78	-0.32	0.74	0.17
BATF	ENSG00000156127	86.11	0.41	0.74	0.17
FAU	ENSG00000149806	749.56	-0.18	0.73	0.17
LHFPL2	ENSG00000145685	322.94	0.23	0.73	0.17
IGSF6	ENSG00000140749	272.25	0.26	0.73	0.17
DBI	ENSG00000155368	248.76	0.27	0.73	0.17
RP11-611L7.1	ENSG00000260054	194.78	0.29	0.73	0.17
QARS	ENSG00000172053	132.9	0.34	0.73	0.17
ZNF207	ENSG00000010244	122.19	-0.34	0.73	0.17
TUBA1C	ENSG00000167553	120.52	0.36	0.73	0.17
MRPS24	ENSG00000062582	104.78	-0.37	0.73	0.17
UFC1	ENSG00000143222	91.96	-0.4	0.73	0.17
THEMIS2	ENSG00000130775	304.17	0.23	0.72	0.16
ADAP2	ENSG00000184060	266.56	0.25	0.72	0.16
RRBP1	ENSG00000125844	216.22	0.27	0.72	0.16
CCDC142	ENSG00000135637	205.03	-0.28	0.72	0.16
NUDC	ENSG00000090273	136.56	0.35	0.72	0.16
TSSC4	ENSG00000184281	129.41	-0.33	0.72	0.16
IRF2	ENSG00000168310	112.02	-0.35	0.72	0.16
PTPRE	ENSG00000132334	461.86	-0.21	0.71	0.16
FAM195A	ENSG00000172366	288.78	0.25	0.71	0.16
IDH3G	ENSG00000067829	228.97	0.26	0.71	0.16
CPNE1	ENSG00000214078	199.74	0.29	0.71	0.16
FAM213B	ENSG00000157870	180.24	0.32	0.71	0.16
RSBN1L	ENSG00000187257	160.89	-0.31	0.71	0.16
DTNBP1	ENSG00000047579	122.54	0.34	0.71	0.16
SF3B4	ENSG00000143368	101.33	-0.4	0.71	0.16
TMEM208	ENSG00000168701	215.76	-0.26	0.7	0.16
UQCR10	ENSG00000184076	198.34	-0.28	0.7	0.16
CD40	ENSG00000101017	104.48	0.37	0.7	0.16
SSR4	ENSG00000180879	271.82	0.24	0.7	0.15
TSPAN14	ENSG00000108219	158.56	0.31	0.7	0.15
TRIM38	ENSG00000112343	113.3	-0.36	0.7	0.15
FERMT3	ENSG00000149781	469.6	0.21	0.69	0.15
GSDMD	ENSG00000104518	323.1	0.22	0.69	0.15
NELFB	ENSG00000188986	289.05	0.23	0.69	0.15
OTUB1	ENSG00000167770	173.51	0.29	0.69	0.15
PPP1R12C	ENSG00000125503	134.51	0.32	0.69	0.15
PGLS	ENSG00000130313	93.11	0.38	0.69	0.15
PNN	ENSG00000100941	88.24	-0.38	0.69	0.15
LGALS3	ENSG00000131981	1952.25	0.15	0.68	0.14
RNPEPL1	ENSG00000142327	340.03	0.21	0.68	0.14
LONP1	ENSG00000196365	161.38	-0.3	0.68	0.14
CYBB	ENSG00000165168	158.34	-0.29	0.68	0.14
UPP1	ENSG00000183696	117.35	-0.33	0.68	0.14
EBP	ENSG00000147155	113.54	0.35	0.68	0.14
IFI6	ENSG00000126709	866.3	0.41	0.67	0.14
AURKAIP1	ENSG00000175756	334.37	-0.23	0.67	0.14
CDC42	ENSG00000070831	249.08	0.25	0.67	0.14
NFKBIE	ENSG00000146232	248.23	0.24	0.67	0.14
SUPT5H	ENSG00000196235	237.03	-0.24	0.67	0.14
HNRNPUL2	ENSG00000214753	217.96	0.26	0.67	0.14
DNAJC5	ENSG00000101152	208.49	0.26	0.67	0.14
RANBP3	ENSG00000031823	151.37	0.31	0.67	0.14
SGSM3	ENSG00000100359	89.41	0.37	0.67	0.14
CDK16	ENSG00000102225	88.68	0.38	0.67	0.14
TCEB2	ENSG00000103363	394.48	-0.2	0.66	0.14
TYK2	ENSG00000105397	302.43	-0.23	0.66	0.14
UBALD2	ENSG00000185262	234.87	0.24	0.66	0.14
METRNL	ENSG00000176845	173.45	0.28	0.66	0.14
NAPA	ENSG00000105402	866.28	-0.19	0.66	0.13
ITM2B	ENSG00000136156	338.02	0.24	0.66	0.13
G6PC3	ENSG00000141349	140.74	0.3	0.66	0.13
C19orf59	ENSG00000183019	87.03	-0.38	0.66	0.13
VAMP8	ENSG00000118640	567.51	0.18	0.65	0.13
IER3	ENSG00000137331	366.94	0.2	0.65	0.13
C5AR1	ENSG00000197405	359.88	0.2	0.65	0.13
RPS21	ENSG00000171858	254.99	0.23	0.65	0.13
UBL5	ENSG00000198258	225.3	-0.26	0.65	0.13
C4orf3	ENSG00000164096	189.08	-0.29	0.65	0.13
ZNF787	ENSG00000142409	139.61	0.31	0.65	0.13
SLC8B1	ENSG00000089060	129.15	0.31	0.65	0.13
SRSF7	ENSG00000115875	106.68	0.34	0.65	0.13
RXRB	ENSG00000204231	86.07	0.38	0.65	0.13
LY6E	ENSG00000160932	3765.23	0.14	0.64	0.13
PLAUR	ENSG00000011422	430.3	0.19	0.64	0.13
GADD45GIP1	ENSG00000179271	309.85	-0.21	0.64	0.13
CLTA	ENSG00000122705	295.68	0.25	0.64	0.13
HADHA	ENSG00000084754	232.54	0.24	0.64	0.13
MYH9	ENSG00000100345	217.42	0.24	0.64	0.13
STK10	ENSG00000072786	192.44	0.26	0.64	0.13
MICU1	ENSG00000107745	171.18	-0.27	0.64	0.13
CCNI	ENSG00000118816	168	-0.27	0.64	0.13
MRPL52	ENSG00000172590	164.83	-0.27	0.64	0.13
AD000671.6	ENSG00000267120	149.83	0.29	0.64	0.13
TIMM13	ENSG00000099800	137.82	-0.31	0.64	0.13
CDC34	ENSG00000099804	115.54	-0.32	0.64	0.13
TMEM66	ENSG00000133872	98.79	-0.35	0.64	0.13
PI4KA	ENSG00000241973	97.78	0.36	0.64	0.13
HM13	ENSG00000101294	616.4	0.17	0.63	0.13
SNRPB	ENSG00000125835	335.37	0.21	0.63	0.13
NAGLU	ENSG00000108784	257.54	0.23	0.63	0.13
FPGS	ENSG00000136877	243.59	0.24	0.63	0.13
NADK	ENSG00000008130	227.89	0.24	0.63	0.13
ETFB	ENSG00000105379	173.11	0.27	0.63	0.13
STRA13	ENSG00000169689	112.95	-0.32	0.63	0.13
KDM5C	ENSG00000126012	104.95	-0.33	0.63	0.13
GPR137	ENSG00000173264	95.4	0.35	0.63	0.13
BLVRA	ENSG00000106605	94.83	0.35	0.63	0.13
GHDC	ENSG00000167925	88.03	0.36	0.63	0.13
GPATCH3	ENSG00000198746	82.44	0.37	0.63	0.13
PTAFR	ENSG00000169403	660.18	0.16	0.62	0.12
MT-ND5	ENSG00000198786	595.88	-0.2	0.62	0.12
IFFO1	ENSG00000010295	243.01	0.24	0.62	0.12
TRIP6	ENSG00000087077	212.95	0.25	0.62	0.12
SLC43A2	ENSG00000167703	164.33	0.28	0.62	0.12
UBAC1	ENSG00000130560	159.37	0.28	0.62	0.12
PPP2R1A	ENSG00000105568	138.83	-0.3	0.62	0.12
C16orf13	ENSG00000130731	122.16	-0.32	0.62	0.12
SLC25A39	ENSG00000013306	121.54	0.31	0.62	0.12
SCAP	ENSG00000114650	91.08	-0.35	0.62	0.12
NCF4	ENSG00000100365	358.7	0.19	0.61	0.12
TNFRSF1A	ENSG00000067182	339.31	0.2	0.61	0.12
CYSTM1	ENSG00000120306	253.25	0.25	0.61	0.12
SIRT2	ENSG00000068903	217.4	0.25	0.61	0.12
CBX6	ENSG00000183741	201.06	0.24	0.61	0.12
RNF40	ENSG00000103549	197.69	-0.24	0.61	0.12
RALBP1	ENSG00000017797	156.14	-0.27	0.61	0.12
ATF4	ENSG00000128272	154.65	0.31	0.61	0.12
APRT	ENSG00000198931	116.13	0.31	0.61	0.12
MYL12B	ENSG00000118680	115.33	0.32	0.61	0.12
HNRNPC	ENSG00000092199	99.31	-0.33	0.61	0.12
CMTM3	ENSG00000140931	98.25	0.34	0.61	0.12
SNRPD3	ENSG00000100028	93.94	-0.37	0.61	0.12
CECR5	ENSG00000069998	84.2	0.37	0.61	0.12
FSCN3	ENSG00000106328	267.23	0.23	0.6	0.12
LCP1	ENSG00000136167	178.79	-0.26	0.6	0.12
PLD3	ENSG00000105223	3804.48	-0.11	0.6	0.11
APH1A	ENSG00000117362	165.78	0.27	0.6	0.11
DENND3	ENSG00000105339	107.16	0.32	0.6	0.11
C16orf70	ENSG00000125149	85.86	0.36	0.6	0.11
HLA-E	ENSG00000204592	2726.15	0.12	0.59	0.11
LRPAP1	ENSG00000163956	774.93	0.17	0.59	0.11
LAMP1	ENSG00000185896	550.09	0.17	0.59	0.11
PGP	ENSG00000184207	189.67	-0.27	0.59	0.11
CYC1	ENSG00000179091	188.86	0.25	0.59	0.11
TRABD	ENSG00000170638	171.46	0.25	0.59	0.11
DDX46	ENSG00000145833	149.79	-0.28	0.59	0.11
ACTN1	ENSG00000072110	129.91	-0.28	0.59	0.11
STXBP2	ENSG00000076944	128.2	0.3	0.59	0.11
IL4R	ENSG00000077238	112.68	0.31	0.59	0.11
DAB2	ENSG00000153071	95.89	0.33	0.59	0.11
MIEN1	ENSG00000141741	95.87	-0.33	0.59	0.11
HPS1	ENSG00000107521	310.12	0.2	0.58	0.11
MRPL23	ENSG00000214026	307.65	0.2	0.58	0.11
SF3B5	ENSG00000169976	285.51	-0.22	0.58	0.11
FUS	ENSG00000089280	282.53	0.2	0.58	0.11
TBC1D9B	ENSG00000197226	246.4	0.22	0.58	0.11
COX7C	ENSG00000127184	224.7	-0.25	0.58	0.11
TMUB1	ENSG00000164897	206.39	0.23	0.58	0.11
ESYT1	ENSG00000139641	118.54	0.32	0.58	0.11
ATP5SL	ENSG00000105341	99.76	0.33	0.58	0.11
SEPT2	ENSG00000168385	84.38	-0.35	0.58	0.11
MANBA	ENSG00000109323	118.89	-0.29	0.57	0.11
TNFRSF1B	ENSG00000028137	823.75	0.14	0.57	0.1
LY86	ENSG00000112799	298.82	0.21	0.57	0.1
RAB8A	ENSG00000167461	183.61	0.24	0.57	0.1
TTLL4	ENSG00000135912	159.88	-0.25	0.57	0.1
MPHOSPH8	ENSG00000196199	145.05	-0.27	0.57	0.1
MARK3	ENSG00000075413	140.58	-0.27	0.57	0.1
SFSWAP	ENSG00000061936	136.39	-0.27	0.57	0.1
NDUFB4	ENSG00000065518	122.91	0.28	0.57	0.1
HEBP1	ENSG00000013583	112.54	0.3	0.57	0.1
IFNAR2	ENSG00000159110	109.35	0.31	0.57	0.1
DNAJC7	ENSG00000168259	103.44	0.31	0.57	0.1
RTN4	ENSG00000115310	85.63	0.35	0.57	0.1
UBA1	ENSG00000130985	378.21	0.19	0.56	0.1
SSR2	ENSG00000163479	249.13	0.21	0.56	0.1
ALDH3B1	ENSG00000006534	185.31	0.24	0.56	0.1
FUOM	ENSG00000148803	160.56	0.28	0.56	0.1
CUTA	ENSG00000112514	115.86	0.3	0.56	0.1
PSMC4	ENSG00000013275	105.7	0.31	0.56	0.1
MRPS7	ENSG00000125445	91.21	0.32	0.56	0.1
LRP1	ENSG00000123384	614.89	0.15	0.55	0.1
BLOC1S1	ENSG00000135441	412.63	0.17	0.55	0.1
CCL2	ENSG00000108691	304.78	-0.23	0.55	0.1
GSK3A	ENSG00000105723	225.35	-0.22	0.55	0.1
NDUFS8	ENSG00000110717	212.97	0.22	0.55	0.1
KIAA0247	ENSG00000100647	190.06	0.24	0.55	0.1
PSME2	ENSG00000100911	174.13	0.25	0.55	0.1
C6orf1	ENSG00000186577	172.83	0.24	0.55	0.1
MAPK3	ENSG00000102882	158.75	0.25	0.55	0.1
NUDT1	ENSG00000106268	148.5	0.26	0.55	0.1
SEC13	ENSG00000157020	127.32	0.3	0.55	0.1
COX17	ENSG00000138495	103.34	-0.32	0.55	0.1
C1orf35	ENSG00000143793	84.55	-0.35	0.55	0.1
LYZ	ENSG00000090382	11429.6	-0.1	0.54	0.09
CALR	ENSG00000179218	1856.72	0.12	0.54	0.09
XAF1	ENSG00000132530	692.21	0.15	0.54	0.09
TNFRSF14	ENSG00000157873	549.81	0.16	0.54	0.09
RBPJ	ENSG00000168214	153.33	-0.25	0.54	0.09
DNAJB11	ENSG00000090520	105.26	-0.3	0.54	0.09
RNF216	ENSG00000011275	99.69	-0.31	0.54	0.09
UXT	ENSG00000126756	84.06	-0.34	0.54	0.09
DBNL	ENSG00000136279	300.43	0.19	0.53	0.09
CDC37	ENSG00000105401	250.37	0.2	0.53	0.09
PLA2G7	ENSG00000146070	218.2	0.24	0.53	0.09
AGPAT3	ENSG00000160216	210.56	0.22	0.53	0.09
PACSIN2	ENSG00000100266	186.27	0.23	0.53	0.09
GRAMD1A	ENSG00000089351	154.14	0.24	0.53	0.09
DHX38	ENSG00000140829	142.47	-0.25	0.53	0.09
SIDT2	ENSG00000149577	128.21	0.27	0.53	0.09
CEBPD	ENSG00000221869	128.11	0.28	0.53	0.09
CCDC107	ENSG00000159884	125.84	0.29	0.53	0.09
SPINT2	ENSG00000167642	117.79	0.28	0.53	0.09
HERC5	ENSG00000138646	117.73	-0.31	0.53	0.09
TESK1	ENSG00000107140	114.95	0.28	0.53	0.09
MEPCE	ENSG00000146834	100.91	0.3	0.53	0.09
RNF5	ENSG00000204308	99.76	-0.31	0.53	0.09
CTD-2369P2.2	ENSG00000175898	87.57	0.32	0.53	0.09
C12orf44	ENSG00000123395	82.49	-0.33	0.53	0.09
UBXN1	ENSG00000162191	398.37	0.17	0.52	0.09
ANAPC11	ENSG00000141552	261.59	0.19	0.52	0.09
RBM25	ENSG00000119707	231.52	-0.22	0.52	0.09
CCDC12	ENSG00000160799	153.52	0.25	0.52	0.09
PTTG1IP	ENSG00000183255	148	-0.25	0.52	0.09
PPP4C	ENSG00000149923	124.99	0.27	0.52	0.09
KIAA0319L	ENSG00000142687	118.43	-0.27	0.52	0.09
FGD3	ENSG00000127084	98.21	0.3	0.52	0.09
ARHGAP9	ENSG00000123329	97.45	0.3	0.52	0.09
SETD5	ENSG00000168137	89.4	0.31	0.52	0.09
SLC2A8	ENSG00000136856	83.28	0.32	0.52	0.09
RPS7	ENSG00000171863	83.26	-0.34	0.52	0.09
LAPTM5	ENSG00000162511	3886.89	0.1	0.51	0.09
HLA-C	ENSG00000204525	1777.61	0.11	0.51	0.09
SERPING1	ENSG00000149131	1158.93	0.13	0.51	0.09
FCGRT	ENSG00000104870	702.69	0.14	0.51	0.09
SLC16A3	ENSG00000141526	590.03	0.15	0.51	0.09
ARPC2	ENSG00000163466	555.38	-0.16	0.51	0.09
MAP7D1	ENSG00000116871	465.15	0.15	0.51	0.09
LILRA6	ENSG00000244482	372.96	0.18	0.51	0.09
H3F3B	ENSG00000132475	370.46	-0.19	0.51	0.09
CD82	ENSG00000085117	318.58	-0.19	0.51	0.09
PDE4DIP	ENSG00000178104	230.6	0.21	0.51	0.09
MRPS34	ENSG00000074071	188.19	-0.24	0.51	0.09
SUGP2	ENSG00000064607	139.19	0.25	0.51	0.09
SNX3	ENSG00000112335	138	0.26	0.51	0.09
FAM96A	ENSG00000166797	113.95	-0.28	0.51	0.09
ABCD1	ENSG00000101986	110.95	-0.28	0.51	0.09
MPG	ENSG00000103152	105.54	0.29	0.51	0.09
RRP1	ENSG00000160214	98.93	-0.3	0.51	0.09
APMAP	ENSG00000101474	94.69	0.29	0.51	0.09
CHCHD2	ENSG00000106153	93.36	0.31	0.51	0.09
IFIT3	ENSG00000119917	708.36	0.15	0.5	0.09
OS9	ENSG00000135506	544.98	0.15	0.5	0.09
SORBS3	ENSG00000120896	445.11	0.16	0.5	0.09
TGFB1	ENSG00000105329	400.57	0.17	0.5	0.09
SERPINA1	ENSG00000197249	363.11	0.17	0.5	0.09
AGRN	ENSG00000188157	331.36	0.17	0.5	0.09
SLC39A1	ENSG00000143570	268.38	0.19	0.5	0.09
EIF1	ENSG00000173812	225.71	-0.2	0.5	0.09
HMHA1	ENSG00000180448	214.14	0.21	0.5	0.09
CAMK1	ENSG00000134072	179.28	0.23	0.5	0.09
MRFAP1	ENSG00000179010	157.91	-0.24	0.5	0.09
RNF167	ENSG00000108523	144.16	-0.24	0.5	0.09
INF2	ENSG00000203485	137.23	0.26	0.5	0.09
ZFP36L1	ENSG00000185650	133.66	0.25	0.5	0.09
LPXN	ENSG00000110031	127.2	0.26	0.5	0.09
RUNX1	ENSG00000159216	106.39	0.28	0.5	0.09
POLDIP3	ENSG00000100227	97.49	0.29	0.5	0.09
RAD9A	ENSG00000172613	95.53	0.3	0.5	0.09
NDUFB9	ENSG00000147684	410.07	0.17	0.49	0.09
MBD3	ENSG00000071655	279.23	-0.19	0.49	0.09
PRELID1	ENSG00000169230	252.52	0.19	0.49	0.09
CARM1	ENSG00000142453	239.03	0.19	0.49	0.09
PRKCSH	ENSG00000130175	220.86	0.21	0.49	0.09
LARP1	ENSG00000155506	215.72	-0.2	0.49	0.09
ARHGAP25	ENSG00000163219	213.34	0.22	0.49	0.09
SCPEP1	ENSG00000121064	148.3	0.26	0.49	0.09
GMPR	ENSG00000137198	134.81	0.25	0.49	0.09
NDUFC1	ENSG00000109390	128.33	-0.3	0.49	0.09
MAN2A2	ENSG00000196547	121.44	-0.27	0.49	0.09
ASCC2	ENSG00000100325	119.43	0.27	0.49	0.09
DCAF11	ENSG00000100897	103.82	-0.29	0.49	0.09
NFKB2	ENSG00000077150	99.15	0.28	0.49	0.09
VARS	ENSG00000204394	93.4	0.29	0.49	0.09
PNISR	ENSG00000132424	85.5	-0.3	0.49	0.09
NDUFA3	ENSG00000170906	208.08	0.23	0.48	0.08
SPHK1	ENSG00000176170	205.63	-0.2	0.48	0.08
HMGA1	ENSG00000137309	187.01	0.21	0.48	0.08
ZDHHC7	ENSG00000153786	161.23	0.23	0.48	0.08
PPM1M	ENSG00000164088	157.14	0.24	0.48	0.08
ABCC3	ENSG00000108846	146.57	0.24	0.48	0.08
MSRB1	ENSG00000198736	132.33	0.24	0.48	0.08
MLEC	ENSG00000110917	116.83	-0.26	0.48	0.08
MRPS6	ENSG00000243927	115.06	-0.26	0.48	0.08
GNPDA1	ENSG00000113552	94.17	-0.3	0.48	0.08
VAMP3	ENSG00000049245	93.14	0.29	0.48	0.08
TNFRSF10B	ENSG00000120889	88.04	-0.31	0.48	0.08
MPDU1	ENSG00000129255	513.79	0.14	0.47	0.08
PRAM1	ENSG00000133246	387.69	0.16	0.47	0.08
RGS12	ENSG00000159788	272.1	-0.18	0.47	0.08
CCDC85B	ENSG00000175602	223.13	0.2	0.47	0.08
SRP14	ENSG00000140319	198.03	0.2	0.47	0.08
PPP1R18	ENSG00000146112	156.41	0.24	0.47	0.08
PSMD7	ENSG00000103035	150.16	-0.23	0.47	0.08
PIP5K1C	ENSG00000186111	143.82	0.24	0.47	0.08
PXN	ENSG00000089159	131.03	0.25	0.47	0.08
BCKDHA	ENSG00000248098	108.39	0.26	0.47	0.08
ARHGEF18	ENSG00000104880	91.56	0.29	0.47	0.08
MRPL18	ENSG00000112110	87.85	-0.29	0.47	0.08
SLC25A5	ENSG00000005022	85.17	0.3	0.47	0.08
VAV1	ENSG00000141968	210.01	0.2	0.46	0.07
CFD	ENSG00000197766	200.32	0.21	0.46	0.07
MIR3654	ENSG00000255508	188.7	0.48	0.46	0.07
STIP1	ENSG00000168439	167.34	-0.22	0.46	0.07
SSBP4	ENSG00000130511	135.18	0.24	0.46	0.07
IRF1	ENSG00000125347	126.75	0.24	0.46	0.07
EMC6	ENSG00000127774	119.25	-0.26	0.46	0.07
ZNF672	ENSG00000171161	107.5	0.26	0.46	0.07
MVD	ENSG00000167508	107.13	0.27	0.46	0.07
IFI27L2	ENSG00000119632	107.05	0.27	0.46	0.07
E2F4	ENSG00000205250	106.48	0.26	0.46	0.07
ACOT13	ENSG00000112304	105.03	0.27	0.46	0.07
PDXDC1	ENSG00000179889	101.41	0.27	0.46	0.07
RSL1D1	ENSG00000171490	88.32	-0.29	0.46	0.07
AP2S1	ENSG00000042753	841.71	0.13	0.45	0.07
SLC25A6	ENSG00000169100	380.61	0.16	0.45	0.07
DDX5	ENSG00000108654	302.4	0.18	0.45	0.07
PNPLA6	ENSG00000032444	286.45	0.17	0.45	0.07
FYB	ENSG00000082074	228.57	0.19	0.45	0.07
CMTR1	ENSG00000137200	160.03	0.22	0.45	0.07
ATN1	ENSG00000111676	103.15	-0.26	0.45	0.07
IP6K2	ENSG00000068745	84.87	0.29	0.45	0.07
RPL35	ENSG00000136942	691.71	0.13	0.44	0.07
NRBP1	ENSG00000115216	322.2	0.16	0.44	0.07
RPL27A	ENSG00000166441	262.48	0.36	0.44	0.07
MMP24-AS1	ENSG00000126005	242.36	-0.19	0.44	0.07
RPL32	ENSG00000144713	198.31	-0.2	0.44	0.07
LSM7	ENSG00000130332	172.88	-0.2	0.44	0.07
RHOC	ENSG00000155366	101.45	0.26	0.44	0.07
SPINT1	ENSG00000166145	98.87	-0.26	0.44	0.07
ARHGAP35	ENSG00000160007	92.67	0.27	0.44	0.07
HEXDC	ENSG00000169660	157.68	0.21	0.44	0.06
TACC1	ENSG00000147526	131.91	-0.23	0.44	0.06
TRAPPC12	ENSG00000171853	105.66	-0.25	0.44	0.06
RCC2	ENSG00000179051	95.6	0.26	0.44	0.06
UBC	ENSG00000150991	1482.02	-0.11	0.43	0.06
SAMHD1	ENSG00000101347	547.82	0.13	0.43	0.06
CHD4	ENSG00000111642	475.57	-0.14	0.43	0.06
ZNF385A	ENSG00000161642	303.01	-0.16	0.43	0.06
FAM129B	ENSG00000136830	300.75	-0.16	0.43	0.06
IGF2R	ENSG00000197081	208.12	0.19	0.43	0.06
DRAM1	ENSG00000136048	190.06	0.2	0.43	0.06
MKNK2	ENSG00000099875	180.1	0.2	0.43	0.06
RPL12	ENSG00000197958	160.94	0.22	0.43	0.06
LSMD1	ENSG00000183011	134.59	0.23	0.43	0.06
MLX	ENSG00000108788	120.27	0.24	0.43	0.06
FBXO6	ENSG00000116663	109.74	0.25	0.43	0.06
SLC17A9	ENSG00000101194	99.57	0.25	0.43	0.06
ADPRHL2	ENSG00000116863	91.44	-0.27	0.43	0.06
BNIP3L	ENSG00000104765	86.92	-0.28	0.43	0.06
CSRP1	ENSG00000159176	83.89	0.28	0.43	0.06
AKAP9	ENSG00000127914	82.57	-0.28	0.43	0.06
SH3BGRL3	ENSG00000142669	4353.45	-0.09	0.42	0.06
KCNAB2	ENSG00000069424	529.33	0.13	0.42	0.06
SYK	ENSG00000165025	318.63	0.15	0.42	0.06
NEU1	ENSG00000204386	285.93	-0.16	0.42	0.06
SNF8	ENSG00000159210	239.57	0.17	0.42	0.06
SNX1	ENSG00000028528	208.31	0.21	0.42	0.06
CTD-2207O23.10	ENSG00000268614	206.16	0.18	0.42	0.06
EXOC7	ENSG00000182473	188.89	0.19	0.42	0.06
PSMD3	ENSG00000108344	186.02	0.19	0.42	0.06
PARK7	ENSG00000116288	172.38	0.22	0.42	0.06
TNFAIP8L2	ENSG00000163154	160.39	0.2	0.42	0.06
SAMD4B	ENSG00000179134	135.24	-0.22	0.42	0.06
SHC1	ENSG00000160691	132.67	0.22	0.42	0.06
COX14	ENSG00000178449	128.7	-0.25	0.42	0.06
RANGAP1	ENSG00000100401	122.26	-0.23	0.42	0.06
YIF1B	ENSG00000167645	109.08	0.24	0.42	0.06
HNRNPDL	ENSG00000152795	108.5	-0.25	0.42	0.06
SNX9	ENSG00000130340	108.39	-0.24	0.42	0.06
DHRS4L2	ENSG00000187630	105.13	0.3	0.42	0.06
BET1L	ENSG00000177951	90.53	0.27	0.42	0.06
XRCC6	ENSG00000196419	86.29	-0.28	0.42	0.06
IFITM2	ENSG00000185201	1000.62	0.11	0.41	0.06
DRAP1	ENSG00000175550	499.03	0.16	0.41	0.06
BCAP31	ENSG00000185825	391.02	0.14	0.41	0.06
CEBPA	ENSG00000245848	263.02	0.16	0.41	0.06
ACTR1A	ENSG00000138107	226.82	0.17	0.41	0.06
NDUFB2	ENSG00000090266	199.47	0.18	0.41	0.06
COX6A1	ENSG00000111775	186.81	0.18	0.41	0.06
SLC25A11	ENSG00000108528	163.47	-0.2	0.41	0.06
PLP2	ENSG00000102007	160.56	0.21	0.41	0.06
SNRNP200	ENSG00000144028	153.71	-0.2	0.41	0.06
CPM	ENSG00000135678	132.04	0.21	0.41	0.06
EZR	ENSG00000092820	124.19	-0.22	0.41	0.06
TMC6	ENSG00000141524	121.32	0.23	0.41	0.06
TCIRG1	ENSG00000110719	120.28	0.23	0.41	0.06
PHC2	ENSG00000134686	98.12	0.25	0.41	0.06
MED15	ENSG00000099917	93.64	0.25	0.41	0.06
SH3GL1	ENSG00000141985	89.87	0.26	0.41	0.06
PPM1F	ENSG00000100034	87.95	-0.26	0.41	0.06
NBEAL2	ENSG00000160796	236.25	0.16	0.4	0.06
CNDP2	ENSG00000133313	225.5	0.17	0.4	0.06
EEF1D	ENSG00000104529	177.92	0.19	0.4	0.06
BAP1	ENSG00000163930	151.67	-0.21	0.4	0.06
ASNA1	ENSG00000198356	146.86	0.2	0.4	0.06
SLC12A9	ENSG00000146828	141.47	0.21	0.4	0.06
HNRNPD	ENSG00000138668	120.83	-0.24	0.4	0.06
AIP	ENSG00000110711	119.83	0.22	0.4	0.06
GLB1	ENSG00000170266	114.95	0.23	0.4	0.06
BTBD2	ENSG00000133243	111.71	-0.24	0.4	0.06
EIF2AK2	ENSG00000055332	106.45	0.24	0.4	0.06
MOGS	ENSG00000115275	106.1	-0.24	0.4	0.06
ARHGAP10	ENSG00000071205	97.16	0.24	0.4	0.06
C6orf89	ENSG00000198663	94	-0.25	0.4	0.06
FNIP2	ENSG00000052795	92.59	-0.25	0.4	0.06
SMDT1	ENSG00000183172	88.38	-0.26	0.4	0.06
SIRT7	ENSG00000187531	87.86	-0.26	0.4	0.06
DHRSX	ENSG00000169084	83.29	0.27	0.4	0.06
LAGE3	ENSG00000196976	83.06	-0.28	0.4	0.06
C10orf54	ENSG00000107738	529.62	0.12	0.39	0.06
AHNAK	ENSG00000124942	286.73	-0.15	0.39	0.06
PA2G4	ENSG00000170515	103.15	-0.25	0.39	0.06
HLA-B	ENSG00000234745	9521.57	0.08	0.39	0.05
EFHD2	ENSG00000142634	665.59	0.12	0.39	0.05
PSMB9	ENSG00000240065	377.55	0.14	0.39	0.05
BASP1	ENSG00000176788	204.44	-0.17	0.39	0.05
FAM78A	ENSG00000126882	179.57	0.18	0.39	0.05
INTS1	ENSG00000164880	155.9	-0.2	0.39	0.05
PRKACA	ENSG00000072062	152.93	0.2	0.39	0.05
IER5	ENSG00000162783	126.49	-0.22	0.39	0.05
TRIOBP	ENSG00000100106	120.85	0.22	0.39	0.05
GUK1	ENSG00000143774	403.93	-0.13	0.38	0.05
PEBP1	ENSG00000089220	357.11	0.14	0.38	0.05
SF3B2	ENSG00000087365	329.31	-0.14	0.38	0.05
ANKRD11	ENSG00000167522	274.26	-0.17	0.38	0.05
ARSA	ENSG00000100299	232.25	0.16	0.38	0.05
PFKL	ENSG00000141959	200.76	0.17	0.38	0.05
ARF3	ENSG00000134287	195.9	0.19	0.38	0.05
MRPL41	ENSG00000182154	191.83	0.18	0.38	0.05
NDUFB11	ENSG00000147123	170.11	0.18	0.38	0.05
TMBIM4	ENSG00000155957	139.21	-0.21	0.38	0.05
STRN4	ENSG00000090372	131.99	0.21	0.38	0.05
C11orf68	ENSG00000175573	120.11	0.21	0.38	0.05
RAB35	ENSG00000111737	108.15	0.23	0.38	0.05
TPCN1	ENSG00000186815	95.91	0.24	0.38	0.05
TCEAL4	ENSG00000133142	94.66	0.25	0.38	0.05
GLRX	ENSG00000173221	94.57	0.24	0.38	0.05
CYB561D2	ENSG00000114395	94.09	0.24	0.38	0.05
APOA1BP	ENSG00000163382	85.44	-0.25	0.38	0.05
PAK1	ENSG00000149269	84.59	0.25	0.38	0.05
TMEM175	ENSG00000127419	83.29	0.25	0.38	0.05
TRAF3	ENSG00000131323	82.8	0.25	0.38	0.05
COX6B1	ENSG00000126267	402.41	0.13	0.37	0.05
GNB2	ENSG00000172354	389.86	0.13	0.37	0.05
LAMTOR4	ENSG00000188186	317.25	-0.14	0.37	0.05
TRIM25	ENSG00000121060	232.76	-0.17	0.37	0.05
IKBKE	ENSG00000143466	169.93	0.18	0.37	0.05
SNRPC	ENSG00000124562	148.91	0.19	0.37	0.05
PRPF31	ENSG00000105618	134.7	-0.2	0.37	0.05
PPFIA1	ENSG00000131626	107.59	-0.22	0.37	0.05
DNAJC4	ENSG00000110011	103.01	-0.23	0.37	0.05
C9orf89	ENSG00000165233	98.53	0.23	0.37	0.05
GIGYF1	ENSG00000146830	97.64	-0.23	0.37	0.05
LMO4	ENSG00000143013	97.56	0.23	0.37	0.05
CEBPB	ENSG00000172216	787.77	-0.12	0.36	0.05
MAMDC4	ENSG00000177943	448.79	-0.12	0.36	0.05
CTC-260F20.3	ENSG00000258674	392.49	-0.13	0.36	0.05
ITGAL	ENSG00000005844	330.7	0.13	0.36	0.05
POLR2E	ENSG00000099817	261.1	-0.15	0.36	0.05
IFNGR2	ENSG00000159128	244.71	0.15	0.36	0.05
SLC38A10	ENSG00000157637	226.09	0.16	0.36	0.05
HSD17B14	ENSG00000087076	205.02	0.16	0.36	0.05
GRAMD4	ENSG00000075240	200.97	0.17	0.36	0.05
MKL1	ENSG00000196588	190.31	0.17	0.36	0.05
RPS5	ENSG00000083845	182.66	0.17	0.36	0.05
HCFC1R1	ENSG00000103145	182.21	0.17	0.36	0.05
BRK1	ENSG00000254999	168.09	-0.19	0.36	0.05
LIMK1	ENSG00000106683	157.86	0.18	0.36	0.05
RPL27	ENSG00000131469	152.1	0.2	0.36	0.05
PMF1	ENSG00000160783	140.23	0.2	0.36	0.05
CFB	ENSG00000244255	131	0.21	0.36	0.05
IRF2BP2	ENSG00000168264	118.44	-0.21	0.36	0.05
SFXN3	ENSG00000107819	116.52	0.21	0.36	0.05
GDE1	ENSG00000006007	107.38	-0.22	0.36	0.05
ZDHHC24	ENSG00000174165	106.73	0.22	0.36	0.05
JMJD8	ENSG00000161999	106.3	-0.22	0.36	0.05
TRIM26	ENSG00000234127	103.03	0.22	0.36	0.05
COX5A	ENSG00000178741	93.91	0.23	0.36	0.05
VPS37B	ENSG00000139722	93.42	0.23	0.36	0.05
TBRG1	ENSG00000154144	87.43	-0.24	0.36	0.05
SLC25A3	ENSG00000075415	87.17	-0.24	0.36	0.05
PKM	ENSG00000067225	2043.88	0.08	0.35	0.05
ATP6V1F	ENSG00000128524	1318.66	-0.09	0.35	0.05
MIF	ENSG00000240972	502.36	0.11	0.35	0.05
PTBP1	ENSG00000011304	349.48	-0.13	0.35	0.05
ZNFX1	ENSG00000124201	277.44	0.15	0.35	0.05
CSF3R	ENSG00000119535	249.35	0.15	0.35	0.05
MRP63	ENSG00000173141	240.96	-0.15	0.35	0.05
EIF3K	ENSG00000178982	216.78	0.18	0.35	0.05
HPCAL1	ENSG00000115756	213.42	0.16	0.35	0.05
DDRGK1	ENSG00000198171	202.62	0.16	0.35	0.05
ORAI1	ENSG00000182500	194.27	0.16	0.35	0.05
MSN	ENSG00000147065	178.03	0.17	0.35	0.05
SLCO3A1	ENSG00000176463	162.82	-0.18	0.35	0.05
PDIA6	ENSG00000143870	138	-0.19	0.35	0.05
P2RX7	ENSG00000089041	134.9	-0.21	0.35	0.05
DNPEP	ENSG00000123992	103.06	-0.22	0.35	0.05
EMC4	ENSG00000128463	98.45	-0.22	0.35	0.05
GPI	ENSG00000105220	93.6	0.22	0.35	0.05
HDLBP	ENSG00000115677	319.61	-0.13	0.35	0.04
RPUSD3	ENSG00000156990	128.9	-0.2	0.35	0.04
NT5C2	ENSG00000076685	91.95	-0.24	0.35	0.04
RPL8	ENSG00000161016	832.81	0.1	0.34	0.04
P4HB	ENSG00000185624	584.94	0.11	0.34	0.04
PLXNB2	ENSG00000196576	485.76	-0.11	0.34	0.04
USF2	ENSG00000105698	416.85	0.12	0.34	0.04
SRSF5	ENSG00000100650	254.29	0.15	0.34	0.04
MAP3K3	ENSG00000198909	248.64	0.14	0.34	0.04
ADAP1	ENSG00000105963	239.26	0.14	0.34	0.04
EIF5B	ENSG00000158417	203.19	0.15	0.34	0.04
PDLIM7	ENSG00000196923	195.97	0.16	0.34	0.04
ATXN2L	ENSG00000168488	188.73	0.16	0.34	0.04
SCYL1	ENSG00000142186	172.99	0.17	0.34	0.04
CTNNBL1	ENSG00000132792	153.86	0.17	0.34	0.04
FLII	ENSG00000177731	152.82	0.18	0.34	0.04
AP1M1	ENSG00000072958	109.5	0.2	0.34	0.04
NLRC5	ENSG00000140853	106.93	0.21	0.34	0.04
TIMP2	ENSG00000035862	896.88	0.09	0.33	0.04
TLN1	ENSG00000137076	524.75	0.11	0.33	0.04
C6orf106	ENSG00000196821	177.55	0.17	0.33	0.04
CSNK2B	ENSG00000204435	163.21	-0.17	0.33	0.04
TNFSF13B	ENSG00000102524	162.4	0.17	0.33	0.04
TTC7A	ENSG00000068724	161.69	0.17	0.33	0.04
CHKB	ENSG00000100288	156.92	0.18	0.33	0.04
C19orf66	ENSG00000130813	152.11	0.17	0.33	0.04
PRMT2	ENSG00000160310	131.89	0.19	0.33	0.04
RNF166	ENSG00000158717	115.45	0.19	0.33	0.04
BRMS1	ENSG00000174744	108.46	-0.2	0.33	0.04
PIEZO1	ENSG00000103335	105.73	0.21	0.33	0.04
H2AFV	ENSG00000105968	100.62	-0.21	0.33	0.04
CORO1C	ENSG00000110880	100.12	0.21	0.33	0.04
CLEC4E	ENSG00000166523	90.83	0.22	0.33	0.04
TBCD	ENSG00000141556	86.78	0.22	0.33	0.04
ADPRH	ENSG00000144843	84.05	0.24	0.33	0.04
PI4K2A	ENSG00000155252	377.78	0.12	0.32	0.04
GLIPR2	ENSG00000122694	345.85	0.12	0.32	0.04
UNC13D	ENSG00000092929	268.18	0.14	0.32	0.04
XPO6	ENSG00000169180	267.31	0.14	0.32	0.04
GPSM3	ENSG00000213654	245.8	0.14	0.32	0.04
NDUFA2	ENSG00000131495	210.53	-0.15	0.32	0.04
PSMD4	ENSG00000159352	194.82	0.15	0.32	0.04
PACS2	ENSG00000179364	169.43	0.16	0.32	0.04
PDIA4	ENSG00000155660	164.32	-0.16	0.32	0.04
GAS7	ENSG00000007237	152.31	0.17	0.32	0.04
TOMM40	ENSG00000130204	148.73	0.17	0.32	0.04
C4orf48	ENSG00000243449	141.28	-0.2	0.32	0.04
APEH	ENSG00000164062	127.24	0.18	0.32	0.04
TRAPPC2L	ENSG00000167515	126.61	-0.18	0.32	0.04
QSOX1	ENSG00000116260	122.19	0.18	0.32	0.04
EHD4	ENSG00000103966	119.92	0.18	0.32	0.04
STAT3	ENSG00000168610	119.47	-0.19	0.32	0.04
GTPBP1	ENSG00000100226	115.99	0.19	0.32	0.04
CIC	ENSG00000079432	114.85	0.19	0.32	0.04
TMED1	ENSG00000099203	113.23	0.19	0.32	0.04
ZFPL1	ENSG00000162300	113.09	0.19	0.32	0.04
GTPBP2	ENSG00000172432	106.3	0.2	0.32	0.04
UQCRC2	ENSG00000140740	105.17	-0.2	0.32	0.04
PCSK7	ENSG00000160613	102.93	-0.2	0.32	0.04
ALDH3A2	ENSG00000072210	100.48	-0.2	0.32	0.04
C6orf47	ENSG00000204439	97.5	0.2	0.32	0.04
ARHGDIA	ENSG00000141522	485.06	0.11	0.31	0.04
PLIN2	ENSG00000147872	238.01	0.14	0.31	0.04
CTNNA1	ENSG00000044115	126.21	0.18	0.31	0.04
EIF3I	ENSG00000084623	115.73	-0.19	0.31	0.04
PABPN1	ENSG00000100836	488.31	-0.11	0.31	0.03
MAP2K2	ENSG00000126934	255.47	-0.14	0.31	0.03
AP5B1	ENSG00000254470	206.56	-0.14	0.31	0.03
STARD3	ENSG00000131748	194.16	0.15	0.31	0.03
SND1	ENSG00000197157	164	0.16	0.31	0.03
EPN1	ENSG00000063245	161.07	0.16	0.31	0.03
SAP18	ENSG00000150459	156.42	-0.17	0.31	0.03
NCLN	ENSG00000125912	137.67	-0.17	0.31	0.03
TMEM189	ENSG00000240849	130.07	0.17	0.31	0.03
MRPS18B	ENSG00000204568	126.57	-0.19	0.31	0.03
PREB	ENSG00000138073	107.86	-0.19	0.31	0.03
ERH	ENSG00000100632	104.95	0.2	0.31	0.03
NCOR1	ENSG00000141027	100.73	-0.2	0.31	0.03
TMEM14C	ENSG00000111843	99.53	0.2	0.31	0.03
SMARCC2	ENSG00000139613	93.73	0.2	0.31	0.03
SDR39U1	ENSG00000100445	88.56	0.21	0.31	0.03
AP2A1	ENSG00000196961	87.53	-0.21	0.31	0.03
PTPRC	ENSG00000081237	86.3	-0.22	0.31	0.03
GHITM	ENSG00000165678	83.69	-0.21	0.31	0.03
ATP6V0B	ENSG00000117410	1215.34	-0.08	0.3	0.03
RPL19	ENSG00000108298	972.35	0.18	0.3	0.03
HLA-F	ENSG00000204642	681.53	-0.09	0.3	0.03
EVL	ENSG00000196405	421.18	-0.11	0.3	0.03
PIM3	ENSG00000198355	294.36	0.15	0.3	0.03
RPL14	ENSG00000188846	273.58	0.14	0.3	0.03
IL10RB	ENSG00000243646	254.76	0.13	0.3	0.03
TRAPPC1	ENSG00000170043	233.29	0.14	0.3	0.03
MXD3	ENSG00000213347	181.69	0.15	0.3	0.03
ATP6V1H	ENSG00000047249	177.34	0.15	0.3	0.03
KARS	ENSG00000065427	168.3	-0.16	0.3	0.03
SBNO2	ENSG00000064932	166.29	0.15	0.3	0.03
CIRBP	ENSG00000099622	151.74	-0.16	0.3	0.03
MTA1	ENSG00000182979	112.09	0.18	0.3	0.03
CTSK	ENSG00000143387	111.03	0.18	0.3	0.03
THRAP3	ENSG00000054118	110.19	-0.19	0.3	0.03
RRAGC	ENSG00000116954	109.15	0.19	0.3	0.03
ARAF	ENSG00000078061	106.94	-0.19	0.3	0.03
MDH2	ENSG00000146701	100.2	0.19	0.3	0.03
AGPAT1	ENSG00000204310	95.89	-0.19	0.3	0.03
PARP9	ENSG00000138496	94.44	0.2	0.3	0.03
ITGB2-AS1	ENSG00000227039	92.81	-0.2	0.3	0.03
FAM214B	ENSG00000005238	83.92	0.21	0.3	0.03
ADAR	ENSG00000160710	563.15	0.1	0.29	0.03
WARS	ENSG00000140105	414.96	0.1	0.29	0.03
CCR5	ENSG00000160791	257.73	-0.12	0.29	0.03
CCT3	ENSG00000163468	244.85	0.13	0.29	0.03
MAPKAPK3	ENSG00000114738	186.05	0.14	0.29	0.03
GMFG	ENSG00000130755	184.38	-0.15	0.29	0.03
OTUD5	ENSG00000068308	163.58	0.16	0.29	0.03
MOV10	ENSG00000155363	154.86	0.15	0.29	0.03
PYGB	ENSG00000100994	152.64	0.15	0.29	0.03
SLC35A4	ENSG00000176087	148.66	0.16	0.29	0.03
C14orf159	ENSG00000133943	135.18	0.16	0.29	0.03
CCT5	ENSG00000150753	133.31	0.16	0.29	0.03
USP22	ENSG00000124422	132.84	0.16	0.29	0.03
HADHB	ENSG00000138029	128.14	0.16	0.29	0.03
DLGAP4	ENSG00000080845	119.92	0.18	0.29	0.03
SEC24C	ENSG00000176986	115.52	-0.18	0.29	0.03
MRPL17	ENSG00000158042	105.14	0.18	0.29	0.03
DIAPH1	ENSG00000131504	100.97	-0.19	0.29	0.03
CHMP4B	ENSG00000101421	98.83	0.19	0.29	0.03
M6PR	ENSG00000003056	95.67	0.19	0.29	0.03
ABCF3	ENSG00000161204	87.05	-0.2	0.29	0.03
SHARPIN	ENSG00000179526	85.12	0.21	0.29	0.03
LRRFIP1	ENSG00000124831	721.7	0.09	0.28	0.03
PSTPIP1	ENSG00000140368	329.98	0.11	0.28	0.03
ZDHHC12	ENSG00000160446	258.85	0.13	0.28	0.03
CHMP2A	ENSG00000130724	248.87	0.12	0.28	0.03
PARP10	ENSG00000178685	248.55	0.12	0.28	0.03
HINT1	ENSG00000169567	214.48	-0.15	0.28	0.03
OASL	ENSG00000135114	212.85	-0.13	0.28	0.03
ADRM1	ENSG00000130706	201.36	0.13	0.28	0.03
PDE4A	ENSG00000065989	175.35	0.15	0.28	0.03
PPM1G	ENSG00000115241	174.72	0.14	0.28	0.03
ADA	ENSG00000196839	172.54	-0.14	0.28	0.03
AKAP13	ENSG00000170776	160.51	0.15	0.28	0.03
IL27RA	ENSG00000104998	159.63	0.14	0.28	0.03
PPIB	ENSG00000166794	154.24	0.15	0.28	0.03
NDUFA7	ENSG00000267855	153.77	-0.15	0.28	0.03
RPS6KB2	ENSG00000175634	153.33	-0.15	0.28	0.03
SAT2	ENSG00000141504	149.06	0.16	0.28	0.03
C20orf24	ENSG00000101084	144.09	-0.15	0.28	0.03
FCN1	ENSG00000085265	141.76	0.15	0.28	0.03
GLYR1	ENSG00000140632	114.42	-0.17	0.28	0.03
IRF8	ENSG00000140968	111	0.17	0.28	0.03
NADSYN1	ENSG00000172890	107.67	-0.18	0.28	0.03
PPIF	ENSG00000108179	103.76	0.18	0.28	0.03
EIF3J	ENSG00000104131	102.41	-0.18	0.28	0.03
ABHD14B	ENSG00000114779	99.13	-0.18	0.28	0.03
NDUFA12	ENSG00000184752	90.75	0.19	0.28	0.03
TOR1B	ENSG00000136816	88.99	0.19	0.28	0.03
RDH11	ENSG00000072042	88.88	0.19	0.28	0.03
MBTPS1	ENSG00000140943	83.39	-0.2	0.28	0.03
PCBP1	ENSG00000169564	494.2	0.09	0.27	0.03
HSP90AB1	ENSG00000096384	433.57	-0.1	0.27	0.03
MYO1F	ENSG00000142347	425.63	-0.1	0.27	0.03
GNPTG	ENSG00000090581	374.17	-0.1	0.27	0.03
RPS3	ENSG00000149273	301.76	0.12	0.27	0.03
C19orf60	ENSG00000006015	293.51	0.11	0.27	0.03
CYTH1	ENSG00000108669	267.33	0.12	0.27	0.03
SLC26A11	ENSG00000181045	260.95	0.12	0.27	0.03
MLF2	ENSG00000089693	260.95	-0.11	0.27	0.03
CELF1	ENSG00000149187	247.95	0.12	0.27	0.03
NHP2L1	ENSG00000100138	247.13	-0.12	0.27	0.03
DDB2	ENSG00000134574	239.69	-0.12	0.27	0.03
NEDD8	ENSG00000129559	230.81	-0.13	0.27	0.03
TREM2	ENSG00000095970	227.58	0.12	0.27	0.03
ERGIC3	ENSG00000125991	224.87	-0.13	0.27	0.03
ARHGAP27	ENSG00000159314	194.59	0.14	0.27	0.03
ATP6V1G1	ENSG00000136888	180	-0.14	0.27	0.03
AKNA	ENSG00000106948	174.92	0.14	0.27	0.03
CD48	ENSG00000117091	167.97	0.15	0.27	0.03
HNRNPAB	ENSG00000197451	163.03	0.14	0.27	0.03
ANXA4	ENSG00000196975	149.37	0.15	0.27	0.03
ARHGEF40	ENSG00000165801	146.03	0.15	0.27	0.03
EHMT2	ENSG00000204371	118.96	0.16	0.27	0.03
ARIH2	ENSG00000177479	118.14	-0.17	0.27	0.03
SNRPA	ENSG00000077312	109.24	0.17	0.27	0.03
CITED2	ENSG00000164442	106.32	-0.17	0.27	0.03
MAN1B1	ENSG00000177239	103.99	0.17	0.27	0.03
NDUFAB1	ENSG00000004779	103.18	-0.18	0.27	0.03
CD83	ENSG00000112149	103.08	0.17	0.27	0.03
PSEN1	ENSG00000080815	101.66	0.17	0.27	0.03
PDCD6	ENSG00000249915	97.48	-0.18	0.27	0.03
PES1	ENSG00000100029	95.19	-0.19	0.27	0.03
GTPBP6	ENSG00000178605	94.82	-0.18	0.27	0.03
RNF7	ENSG00000114125	93.67	-0.19	0.27	0.03
HEBP2	ENSG00000051620	92.52	0.18	0.27	0.03
CALM2	ENSG00000143933	87.99	-0.19	0.27	0.03
UNC93B1	ENSG00000110057	578.08	0.09	0.26	0.03
EEF2	ENSG00000167658	417.53	0.1	0.26	0.03
UQCRC1	ENSG00000010256	388.95	-0.11	0.26	0.03
TMEM205	ENSG00000105518	285.82	0.12	0.26	0.03
NDUFB10	ENSG00000140990	265.54	0.11	0.26	0.03
ILF3	ENSG00000129351	202.51	-0.13	0.26	0.03
PPP1R11	ENSG00000204619	171.01	0.13	0.26	0.03
PPP1R7	ENSG00000115685	151.69	-0.14	0.26	0.03
EWSR1	ENSG00000182944	141.82	0.16	0.26	0.03
MED25	ENSG00000104973	141.13	0.15	0.26	0.03
ADI1	ENSG00000182551	116.66	-0.16	0.26	0.03
NXF1	ENSG00000162231	112.24	-0.17	0.26	0.03
RNF135	ENSG00000181481	103.1	0.17	0.26	0.03
SNX20	ENSG00000167208	92.79	-0.18	0.26	0.03
DAP	ENSG00000112977	92.22	0.18	0.26	0.03
SGK3	ENSG00000104205	87.21	-0.19	0.26	0.03
B3GALT6	ENSG00000176022	83.16	-0.2	0.26	0.03
MYO9B	ENSG00000099331	520.8	0.09	0.25	0.03
PSMD8	ENSG00000099341	405.07	-0.09	0.25	0.03
FAM50A	ENSG00000071859	336.49	-0.1	0.25	0.03
CIB1	ENSG00000185043	283.18	-0.11	0.25	0.03
CTDNEP1	ENSG00000175826	251.69	0.11	0.25	0.03
TMEM219	ENSG00000149932	243.23	-0.12	0.25	0.03
SNX17	ENSG00000115234	219.94	0.12	0.25	0.03
ATP5I	ENSG00000169020	207.19	-0.13	0.25	0.03
APOBEC3C	ENSG00000244509	175.27	0.28	0.25	0.03
RTCB	ENSG00000100220	172.84	0.13	0.25	0.03
MAFG	ENSG00000197063	157.75	0.14	0.25	0.03
NDRG1	ENSG00000104419	157.3	-0.14	0.25	0.03
ATP5G3	ENSG00000154518	156.73	0.15	0.25	0.03
REXO1	ENSG00000079313	148.86	0.14	0.25	0.03
DTX3L	ENSG00000163840	132.74	-0.16	0.25	0.03
CYHR1	ENSG00000187954	130.31	-0.15	0.25	0.03
GANAB	ENSG00000089597	122.67	0.15	0.25	0.03
CLEC7A	ENSG00000172243	120.79	0.16	0.25	0.03
ATG9A	ENSG00000198925	118.66	0.16	0.25	0.03
PSMB2	ENSG00000126067	117.81	0.15	0.25	0.03
PRDX5	ENSG00000126432	115.18	-0.17	0.25	0.03
NKIRAS2	ENSG00000168256	111.9	0.16	0.25	0.03
FBXL15	ENSG00000107872	111.43	0.16	0.25	0.03
RPL31	ENSG00000071082	109.77	0.17	0.25	0.03
GLTSCR2	ENSG00000105373	108.62	0.16	0.25	0.03
DHX30	ENSG00000132153	99.61	-0.17	0.25	0.03
SMARCD3	ENSG00000082014	94.2	0.17	0.25	0.03
ATP2A2	ENSG00000174437	92.02	-0.17	0.25	0.03
RPL35A	ENSG00000182899	91.68	-0.18	0.25	0.03
SH3BP5L	ENSG00000175137	90.86	-0.17	0.25	0.03
LUC7L	ENSG00000007392	84.68	0.18	0.25	0.03
CHMP6	ENSG00000176108	83.64	0.18	0.25	0.03
HLA-A	ENSG00000206503	8515.93	0.05	0.24	0.03
MT-CO3	ENSG00000198938	2704.43	0.17	0.24	0.03
S100A4	ENSG00000196154	1485.4	0.06	0.24	0.03
MFSD12	ENSG00000161091	899.84	-0.07	0.24	0.03
RNF130	ENSG00000113269	844.87	-0.07	0.24	0.03
SRC	ENSG00000197122	251.19	0.11	0.24	0.03
ARL8A	ENSG00000143862	230.16	0.11	0.24	0.03
C19orf70	ENSG00000174917	206.95	-0.11	0.24	0.03
PLIN3	ENSG00000105355	206.56	0.12	0.24	0.03
SUPT6H	ENSG00000109111	188.06	-0.13	0.24	0.03
URM1	ENSG00000167118	146.62	-0.13	0.24	0.03
MAEA	ENSG00000090316	142.1	-0.13	0.24	0.03
RPS6	ENSG00000137154	137.26	-0.14	0.24	0.03
TAF10	ENSG00000166337	135.03	-0.14	0.24	0.03
HAX1	ENSG00000143575	128.43	-0.14	0.24	0.03
PTOV1	ENSG00000104960	124.86	-0.14	0.24	0.03
CREG1	ENSG00000143162	121.28	0.15	0.24	0.03
GTF3C5	ENSG00000148308	121.02	-0.15	0.24	0.03
VPS37C	ENSG00000167987	119.06	0.15	0.24	0.03
RBM5	ENSG00000003756	118.9	0.15	0.24	0.03
RBM3	ENSG00000102317	100.1	-0.16	0.24	0.03
RP5-850E9.3	ENSG00000270299	97.01	-0.16	0.24	0.03
SLC4A2	ENSG00000164889	94.45	0.17	0.24	0.03
DDX56	ENSG00000136271	92.61	0.16	0.24	0.03
UROS	ENSG00000188690	92.54	0.17	0.24	0.03
UPF2	ENSG00000151461	90.34	-0.17	0.24	0.03
REPIN1	ENSG00000214022	89.58	0.17	0.24	0.03
MT-CO1	ENSG00000198804	878.54	-0.08	0.23	0.03
RNF213	ENSG00000173821	745.82	0.07	0.23	0.03
ATOX1	ENSG00000177556	672.84	0.22	0.23	0.03
HCLS1	ENSG00000180353	415.47	0.08	0.23	0.03
PPP1R9B	ENSG00000108819	406.01	0.09	0.23	0.03
SEC61A1	ENSG00000058262	380.1	0.09	0.23	0.03
UBXN6	ENSG00000167671	343.04	0.09	0.23	0.03
TMBIM6	ENSG00000139644	299.47	-0.11	0.23	0.03
RNF145	ENSG00000145860	224.22	-0.11	0.23	0.03
PRPF19	ENSG00000110107	196.14	0.12	0.23	0.03
DDOST	ENSG00000244038	187.3	0.12	0.23	0.03
WIPF1	ENSG00000115935	184.76	0.12	0.23	0.03
EIF4EBP1	ENSG00000187840	177.35	0.12	0.23	0.03
SIPA1	ENSG00000213445	174.51	0.12	0.23	0.03
NUP214	ENSG00000126883	170.53	0.13	0.23	0.03
SPG21	ENSG00000090487	164.31	-0.12	0.23	0.03
NDUFV1	ENSG00000167792	146.51	0.13	0.23	0.03
PSMF1	ENSG00000125818	131.19	0.14	0.23	0.03
ZMIZ1	ENSG00000108175	125.98	0.14	0.23	0.03
SYF2	ENSG00000117614	116.71	-0.15	0.23	0.03
ACSF3	ENSG00000176715	99.95	0.15	0.23	0.03
ZBTB17	ENSG00000116809	97.45	0.16	0.23	0.03
GIGYF2	ENSG00000204120	95.77	-0.16	0.23	0.03
POU2F1	ENSG00000143190	94.04	0.16	0.23	0.03
PSD4	ENSG00000125637	93.3	0.16	0.23	0.03
SEC16A	ENSG00000148396	86.02	-0.17	0.23	0.03
POLDIP2	ENSG00000004142	83.37	-0.16	0.23	0.03
S100A10	ENSG00000197747	694.83	0.08	0.22	0.03
EMP3	ENSG00000142227	537.66	-0.08	0.22	0.03
FKBP2	ENSG00000173486	429.26	0.08	0.22	0.03
SLC11A1	ENSG00000018280	387.89	0.09	0.22	0.03
UQCR11	ENSG00000127540	327.44	-0.09	0.22	0.03
MX2	ENSG00000183486	320.94	0.09	0.22	0.03
RPS19BP1	ENSG00000187051	243.92	-0.1	0.22	0.03
MYD88	ENSG00000172936	213.49	0.11	0.22	0.03
MRPL34	ENSG00000130312	206.66	-0.11	0.22	0.03
UQCRQ	ENSG00000164405	196.48	-0.13	0.22	0.03
TXNDC11	ENSG00000153066	188.24	0.12	0.22	0.03
NSFL1C	ENSG00000088833	188.15	-0.11	0.22	0.03
INPPL1	ENSG00000165458	174.26	0.12	0.22	0.03
CIZ1	ENSG00000148337	156.02	-0.12	0.22	0.03
FADS1	ENSG00000149485	151.37	-0.13	0.22	0.03
TAZ	ENSG00000102125	137.95	0.13	0.22	0.03
DYNLL1	ENSG00000088986	133.61	0.13	0.22	0.03
MARS	ENSG00000166986	130.7	0.14	0.22	0.03
PTPN23	ENSG00000076201	130.21	-0.14	0.22	0.03
CD2BP2	ENSG00000169217	120.44	0.13	0.22	0.03
AGPAT6	ENSG00000158669	118.47	0.14	0.22	0.03
CRTAP	ENSG00000170275	109.82	0.14	0.22	0.03
MCM3AP	ENSG00000160294	108.27	-0.15	0.22	0.03
WIPF2	ENSG00000171475	105.25	-0.15	0.22	0.03
OGFR	ENSG00000060491	105.06	-0.14	0.22	0.03
HMGCL	ENSG00000117305	102.74	-0.15	0.22	0.03
SYMPK	ENSG00000125755	100.11	0.15	0.22	0.03
CFDP1	ENSG00000153774	96.12	0.16	0.22	0.03
FBRSL1	ENSG00000112787	94.36	-0.15	0.22	0.03
WDR82	ENSG00000164091	90.85	-0.15	0.22	0.03
NDUFB7	ENSG00000099795	321.09	-0.09	0.21	0.03
TREX1	ENSG00000213689	249.41	0.09	0.21	0.03
CFLAR	ENSG00000003402	184.39	0.11	0.21	0.03
BABAM1	ENSG00000105393	166.97	-0.12	0.21	0.03
KIAA0100	ENSG00000007202	160.13	0.12	0.21	0.03
TCOF1	ENSG00000070814	158.72	-0.12	0.21	0.03
PDCD6IP	ENSG00000170248	158.63	0.12	0.21	0.03
ATG4B	ENSG00000168397	155.94	-0.12	0.21	0.03
GLA	ENSG00000102393	155.87	0.12	0.21	0.03
PLEKHJ1	ENSG00000104886	148.59	0.12	0.21	0.03
SLC27A3	ENSG00000143554	146.72	0.12	0.21	0.03
NANS	ENSG00000095380	142.29	0.12	0.21	0.03
HLX	ENSG00000136630	139.37	-0.13	0.21	0.03
UPF1	ENSG00000005007	130.07	-0.14	0.21	0.03
SLC7A7	ENSG00000155465	130.05	0.14	0.21	0.03
IP6K1	ENSG00000176095	125.32	-0.13	0.21	0.03
YME1L1	ENSG00000136758	113.68	-0.14	0.21	0.03
LINC00116	ENSG00000175701	111.56	0.13	0.21	0.03
TMUB2	ENSG00000168591	108.46	0.14	0.21	0.03
BCL6	ENSG00000113916	104.99	0.14	0.21	0.03
HNRNPF	ENSG00000169813	104.27	0.14	0.21	0.03
YBX3	ENSG00000060138	102.67	-0.15	0.21	0.03
MAX	ENSG00000125952	97.33	-0.15	0.21	0.03
PTK2B	ENSG00000120899	94.63	0.14	0.21	0.03
RBM42	ENSG00000126254	93.35	-0.15	0.21	0.03
DNAJB2	ENSG00000135924	89.72	-0.15	0.21	0.03
RNPEP	ENSG00000176393	86.42	0.15	0.21	0.03
CD151	ENSG00000177697	84.55	-0.15	0.21	0.03
POLR2F	ENSG00000100142	83.11	-0.16	0.21	0.03
TMEM259	ENSG00000182087	480.94	-0.07	0.2	0.03
ECH1	ENSG00000104823	405.52	0.08	0.2	0.03
NUP62	ENSG00000213024	368.53	0.08	0.2	0.03
FXYD6	ENSG00000137726	364.96	-0.08	0.2	0.03
JUN	ENSG00000177606	208.88	-0.1	0.2	0.03
MAP2K7	ENSG00000076984	208.3	-0.1	0.2	0.03
DNTTIP1	ENSG00000101457	197.95	0.1	0.2	0.03
PSMC5	ENSG00000087191	192.72	0.1	0.2	0.03
PGK1	ENSG00000102144	183.1	0.11	0.2	0.03
SDHB	ENSG00000117118	175.36	0.11	0.2	0.03
NDUFS3	ENSG00000213619	174.77	0.11	0.2	0.03
KLHDC3	ENSG00000124702	171.26	0.11	0.2	0.03
ATP6V1E1	ENSG00000131100	168.97	-0.11	0.2	0.03
VPS39	ENSG00000166887	164.84	0.11	0.2	0.03
TRAPPC3	ENSG00000054116	149.1	0.12	0.2	0.03
DUS1L	ENSG00000169718	146.49	0.11	0.2	0.03
ABCF1	ENSG00000204574	132.54	-0.12	0.2	0.03
CHST11	ENSG00000171310	130.8	0.12	0.2	0.03
RBCK1	ENSG00000125826	130.55	0.12	0.2	0.03
MEA1	ENSG00000124733	124.48	-0.12	0.2	0.03
CHMP4A	ENSG00000254505	123.91	-0.12	0.2	0.03
CLSTN1	ENSG00000171603	121.8	0.13	0.2	0.03
UBN1	ENSG00000118900	114.34	0.13	0.2	0.03
NUCKS1	ENSG00000069275	111.61	0.13	0.2	0.03
COPZ1	ENSG00000111481	110.37	-0.13	0.2	0.03
SPCS1	ENSG00000114902	95.05	-0.16	0.2	0.03
CARD9	ENSG00000187796	89.85	0.15	0.2	0.03
WSB1	ENSG00000109046	88.07	0.14	0.2	0.03
MEF2D	ENSG00000116604	87.45	0.15	0.2	0.03
DAPK3	ENSG00000167657	84.24	0.15	0.2	0.03
APOBR	ENSG00000184730	374.59	0.08	0.2	0.02
ACP5	ENSG00000102575	2823.88	0.05	0.19	0.02
RPLP2	ENSG00000177600	1124.03	0.06	0.19	0.02
RPS16	ENSG00000105193	710.91	-0.07	0.19	0.02
RSAD2	ENSG00000134321	481.59	-0.08	0.19	0.02
SCAND1	ENSG00000171222	351.25	0.08	0.19	0.02
ATP1A1	ENSG00000163399	284.38	0.09	0.19	0.02
SPNS1	ENSG00000169682	276.08	-0.08	0.19	0.02
CD99	ENSG00000002586	274.02	0.09	0.19	0.02
DENND4B	ENSG00000198837	227.3	0.1	0.19	0.02
RPL30	ENSG00000156482	192.96	0.1	0.19	0.02
PSMB7	ENSG00000136930	176.17	-0.1	0.19	0.02
ANKRD13D	ENSG00000172932	163.35	-0.11	0.19	0.02
SPATS2L	ENSG00000196141	156.28	0.11	0.19	0.02
DDIT3	ENSG00000175197	154.56	-0.11	0.19	0.02
PCBP2	ENSG00000197111	131.92	-0.12	0.19	0.02
VPS28	ENSG00000160948	131.1	0.12	0.19	0.02
NOSIP	ENSG00000142546	124.57	0.13	0.19	0.02
GNA12	ENSG00000146535	122.38	0.12	0.19	0.02
ASCL2	ENSG00000183734	118.48	0.12	0.19	0.02
UBE2L3	ENSG00000185651	117.19	0.12	0.19	0.02
TGOLN2	ENSG00000152291	116.3	-0.12	0.19	0.02
AFG3L2	ENSG00000141385	107.03	0.13	0.19	0.02
ABHD17A	ENSG00000129968	102.92	0.13	0.19	0.02
NPEPL1	ENSG00000215440	100.88	-0.13	0.19	0.02
ZNF688	ENSG00000229809	96.85	0.14	0.19	0.02
PRR13	ENSG00000205352	93.46	-0.14	0.19	0.02
PLSCR1	ENSG00000188313	86.08	-0.15	0.19	0.02
CTU1	ENSG00000142544	84.59	0.15	0.19	0.02
ATP6V0C	ENSG00000185883	2712.74	0.1	0.18	0.02
SPI1	ENSG00000066336	894.65	-0.07	0.18	0.02
RPL13	ENSG00000167526	444.95	-0.07	0.18	0.02
ALDOA	ENSG00000149925	326.37	0.08	0.18	0.02
TUBGCP2	ENSG00000130640	300.63	0.08	0.18	0.02
CSNK1D	ENSG00000141551	270.43	-0.08	0.18	0.02
JTB	ENSG00000143543	235.61	-0.09	0.18	0.02
SSU72	ENSG00000160075	218.16	0.09	0.18	0.02
TSR3	ENSG00000007520	212.35	-0.1	0.18	0.02
ARFGAP2	ENSG00000149182	204.84	-0.09	0.18	0.02
MGST3	ENSG00000143198	175.8	0.1	0.18	0.02
LSS	ENSG00000160285	173.1	0.1	0.18	0.02
PHB2	ENSG00000215021	166.21	0.1	0.18	0.02
TOLLIP	ENSG00000078902	163.49	0.1	0.18	0.02
NPLOC4	ENSG00000182446	161.88	0.1	0.18	0.02
COPA	ENSG00000122218	146.33	0.11	0.18	0.02
DAZAP1	ENSG00000071626	145.83	0.11	0.18	0.02
SAP30BP	ENSG00000161526	145.17	-0.11	0.18	0.02
AAK1	ENSG00000115977	144.3	0.11	0.18	0.02
FAM173A	ENSG00000103254	118.85	0.12	0.18	0.02
AATF	ENSG00000108270	118.18	0.12	0.18	0.02
LEPROT	ENSG00000213625	117.96	-0.12	0.18	0.02
FAM89B	ENSG00000176973	117.41	0.12	0.18	0.02
DCTN2	ENSG00000175203	115.95	0.13	0.18	0.02
CCNL2	ENSG00000221978	115.94	-0.12	0.18	0.02
RFNG	ENSG00000169733	114.77	-0.11	0.18	0.02
EIF2B5	ENSG00000145191	110.83	-0.12	0.18	0.02
TIMM17B	ENSG00000126768	108.21	-0.12	0.18	0.02
R3HDM4	ENSG00000198858	107.44	-0.12	0.18	0.02
MYO15B	ENSG00000266714	95.72	-0.13	0.18	0.02
SIGMAR1	ENSG00000147955	87.6	-0.13	0.18	0.02
DNAJC8	ENSG00000126698	86.47	-0.13	0.18	0.02
GPR107	ENSG00000148358	85.85	0.14	0.18	0.02
MAFB	ENSG00000204103	777.77	0.05	0.17	0.02
PTPN6	ENSG00000111679	625.39	0.06	0.17	0.02
ANPEP	ENSG00000166825	581.47	0.06	0.17	0.02
CCR1	ENSG00000163823	429.99	0.07	0.17	0.02
RPL18	ENSG00000063177	419.27	-0.07	0.17	0.02
CNPY3	ENSG00000137161	375.28	0.07	0.17	0.02
RPS8	ENSG00000142937	260.77	-0.08	0.17	0.02
VCP	ENSG00000165280	255.89	0.08	0.17	0.02
C9orf16	ENSG00000171159	247.68	-0.08	0.17	0.02
SREBF2	ENSG00000198911	213.5	-0.09	0.17	0.02
WIPI2	ENSG00000157954	210.77	-0.08	0.17	0.02
S100A8	ENSG00000143546	209.91	-0.09	0.17	0.02
EIF5A	ENSG00000132507	195.64	0.09	0.17	0.02
MRPL28	ENSG00000086504	181.71	0.09	0.17	0.02
SERPINB6	ENSG00000124570	179.52	0.09	0.17	0.02
ATP5L	ENSG00000167283	179.4	-0.1	0.17	0.02
JUND	ENSG00000130522	176.92	0.1	0.17	0.02
RAF1	ENSG00000132155	175.67	0.09	0.17	0.02
CHCHD1	ENSG00000172586	170.41	0.09	0.17	0.02
PSMB1	ENSG00000008018	154.03	0.1	0.17	0.02
C7orf50	ENSG00000146540	150.61	0.1	0.17	0.02
C1orf86	ENSG00000162585	122.96	0.11	0.17	0.02
PTPMT1	ENSG00000110536	119.52	0.11	0.17	0.02
RAB1B	ENSG00000174903	116.44	-0.12	0.17	0.02
MLXIP	ENSG00000175727	114.79	-0.11	0.17	0.02
YARS	ENSG00000134684	112.5	0.12	0.17	0.02
CARS2	ENSG00000134905	104.61	0.11	0.17	0.02
MID1IP1	ENSG00000165175	102.52	-0.12	0.17	0.02
BAZ2A	ENSG00000076108	99.55	-0.12	0.17	0.02
DENND4C	ENSG00000137145	99.34	0.13	0.17	0.02
SH3TC1	ENSG00000125089	94.95	-0.12	0.17	0.02
EMC3	ENSG00000125037	92.78	0.13	0.17	0.02
SH2B1	ENSG00000178188	87.54	0.13	0.17	0.02
POP7	ENSG00000172336	83.86	0.13	0.17	0.02
MED11	ENSG00000161920	83.65	-0.14	0.17	0.02
CTSS	ENSG00000163131	1972.94	0.04	0.16	0.02
GPX1	ENSG00000233276	1837.04	0.05	0.16	0.02
COX8A	ENSG00000176340	929.65	0.05	0.16	0.02
HSPA1A	ENSG00000204389	743.33	-0.06	0.16	0.02
ACTN4	ENSG00000130402	633.33	-0.06	0.16	0.02
PPP1CA	ENSG00000172531	558.81	0.06	0.16	0.02
BAX	ENSG00000087088	441.02	0.06	0.16	0.02
PPP6R1	ENSG00000105063	407.94	-0.07	0.16	0.02
PSMB6	ENSG00000142507	366.2	-0.06	0.16	0.02
KDELR1	ENSG00000105438	307.88	0.07	0.16	0.02
ATP6V0A1	ENSG00000033627	293.15	0.08	0.16	0.02
CLN3	ENSG00000188603	288.01	0.08	0.16	0.02
SDF2L1	ENSG00000128228	263.26	-0.07	0.16	0.02
RP11-290F20.3	ENSG00000224397	253.87	-0.08	0.16	0.02
SMARCD2	ENSG00000108604	211.09	-0.08	0.16	0.02
RPN1	ENSG00000163902	194.43	0.09	0.16	0.02
LUC7L3	ENSG00000108848	159	-0.09	0.16	0.02
TAOK3	ENSG00000135090	158.15	0.09	0.16	0.02
LYL1	ENSG00000104903	153.95	0.1	0.16	0.02
PRRC2B	ENSG00000130723	152.79	0.09	0.16	0.02
SLC52A2	ENSG00000185803	132.66	0.1	0.16	0.02
KXD1	ENSG00000105700	131.78	0.1	0.16	0.02
KLF13	ENSG00000169926	128.52	0.1	0.16	0.02
FURIN	ENSG00000140564	119.98	0.11	0.16	0.02
PGPEP1	ENSG00000130517	107.18	0.11	0.16	0.02
CHD3	ENSG00000170004	103.3	0.11	0.16	0.02
FASTK	ENSG00000164896	99.83	0.11	0.16	0.02
DAGLB	ENSG00000164535	96.52	0.11	0.16	0.02
SRPR	ENSG00000182934	95.16	-0.11	0.16	0.02
TSC22D1	ENSG00000102804	93.17	-0.12	0.16	0.02
GATAD2A	ENSG00000167491	92.2	0.12	0.16	0.02
ZBTB4	ENSG00000174282	90.96	0.12	0.16	0.02
MECP2	ENSG00000169057	89.77	-0.12	0.16	0.02
TNPO3	ENSG00000064419	83.07	-0.12	0.16	0.02
RPL7A	ENSG00000148303	82.89	0.13	0.16	0.02
CYB561A3	ENSG00000162144	2578.8	0.04	0.15	0.02
SLC3A2	ENSG00000168003	511.33	-0.06	0.15	0.02
C19orf10	ENSG00000074842	369.16	0.07	0.15	0.02
SLC43A3	ENSG00000134802	342.06	-0.06	0.15	0.02
SEPW1	ENSG00000178980	337.45	0.07	0.15	0.02
RPL15	ENSG00000174748	336.58	0.06	0.15	0.02
LRP10	ENSG00000197324	334.74	-0.06	0.15	0.02
ARID3A	ENSG00000116017	333.67	-0.06	0.15	0.02
RHOA	ENSG00000067560	310.02	-0.06	0.15	0.02
HDGF	ENSG00000143321	298.18	0.07	0.15	0.02
VEGFB	ENSG00000173511	290.75	-0.07	0.15	0.02
TPD52L2	ENSG00000101150	263.32	0.07	0.15	0.02
PARVG	ENSG00000138964	211.68	0.08	0.15	0.02
AGPAT2	ENSG00000169692	203.05	0.08	0.15	0.02
EIF3D	ENSG00000100353	197.25	0.09	0.15	0.02
STX10	ENSG00000104915	185.48	0.08	0.15	0.02
PTPN18	ENSG00000072135	173.57	0.09	0.15	0.02
KDM2A	ENSG00000173120	167.69	0.08	0.15	0.02
RNF114	ENSG00000124226	162.32	0.09	0.15	0.02
ALG3	ENSG00000214160	145.44	-0.09	0.15	0.02
MTG1	ENSG00000148824	135.9	-0.09	0.15	0.02
HSH2D	ENSG00000196684	133.05	0.09	0.15	0.02
RAB11B	ENSG00000185236	130.53	0.1	0.15	0.02
UROD	ENSG00000126088	129.38	0.09	0.15	0.02
SART1	ENSG00000175467	128.68	0.1	0.15	0.02
SERBP1	ENSG00000142864	122.35	-0.1	0.15	0.02
C15orf48	ENSG00000166920	114.78	-0.1	0.15	0.02
IFIT1	ENSG00000185745	110.59	-0.11	0.15	0.02
WDTC1	ENSG00000142784	108.69	0.11	0.15	0.02
NAA60	ENSG00000122390	108.28	0.11	0.15	0.02
MBD2	ENSG00000134046	103.3	-0.11	0.15	0.02
SQRDL	ENSG00000137767	98.98	0.11	0.15	0.02
NOP56	ENSG00000101361	95.76	0.11	0.15	0.02
PFDN6	ENSG00000204220	95.57	-0.11	0.15	0.02
LYPLA2	ENSG00000011009	93.7	-0.12	0.15	0.02
SPEN	ENSG00000065526	90.99	-0.11	0.15	0.02
ITFG3	ENSG00000167930	88.44	0.12	0.15	0.02
HPS4	ENSG00000100099	86.79	0.12	0.15	0.02
SNAP29	ENSG00000099940	84.1	-0.12	0.15	0.02
TIMP1	ENSG00000102265	775.29	0.05	0.14	0.02
UBE2L6	ENSG00000156587	627.54	0.05	0.14	0.02
WBP2	ENSG00000132471	361.31	0.06	0.14	0.02
AP3D1	ENSG00000065000	344.01	0.06	0.14	0.02
C17orf49	ENSG00000258315	291.17	-0.17	0.14	0.02
EIF4G1	ENSG00000114867	273.73	0.07	0.14	0.02
EIF3B	ENSG00000106263	240.18	-0.07	0.14	0.02
TMEM8A	ENSG00000129925	234.88	-0.07	0.14	0.02
ASAH1	ENSG00000104763	233.17	-0.07	0.14	0.02
DYNC1H1	ENSG00000197102	185.86	0.08	0.14	0.02
LILRB1	ENSG00000104972	183.33	0.08	0.14	0.02
STK40	ENSG00000196182	174.65	0.08	0.14	0.02
SPG7	ENSG00000197912	160.96	-0.09	0.14	0.02
DPEP2	ENSG00000167261	159.78	-0.08	0.14	0.02
HSBP1	ENSG00000230989	152.14	-0.08	0.14	0.02
HTT	ENSG00000197386	144.06	0.09	0.14	0.02
FBXO7	ENSG00000100225	140.65	0.08	0.14	0.02
DCTN1	ENSG00000204843	134.79	-0.09	0.14	0.02
DENND1C	ENSG00000205744	128.65	0.09	0.14	0.02
TRIM8	ENSG00000171206	123.61	0.09	0.14	0.02
TMEM50A	ENSG00000183726	122.68	0.09	0.14	0.02
ARPC5	ENSG00000162704	120.61	-0.09	0.14	0.02
CXXC5	ENSG00000171604	116.27	0.1	0.14	0.02
FES	ENSG00000182511	101.16	0.11	0.14	0.02
CLPTM1L	ENSG00000049656	95.26	-0.1	0.14	0.02
RP11-552F3.12	ENSG00000267426	94.53	-0.11	0.14	0.02
ATP5H	ENSG00000167863	93.61	0.1	0.14	0.02
RUFY1	ENSG00000176783	92.28	-0.1	0.14	0.02
CD300LF	ENSG00000186074	89.67	0.1	0.14	0.02
TRIM27	ENSG00000204713	89.07	0.11	0.14	0.02
IKBKB	ENSG00000104365	85.92	-0.11	0.14	0.02
MAPK8IP3	ENSG00000138834	85.33	-0.11	0.14	0.02
MFSD5	ENSG00000182544	83.26	-0.11	0.14	0.02
FTH1	ENSG00000167996	7220.44	-0.04	0.13	0.02
VAT1	ENSG00000108828	945.72	-0.04	0.13	0.02
RPL11	ENSG00000142676	654.09	-0.04	0.13	0.02
TMEM176A	ENSG00000002933	495.01	-0.05	0.13	0.02
SOD2	ENSG00000112096	460.59	-0.05	0.13	0.02
AGTRAP	ENSG00000177674	419.54	0.05	0.13	0.02
AUP1	ENSG00000115307	389.52	-0.05	0.13	0.02
LTBR	ENSG00000111321	339.81	0.06	0.13	0.02
TPI1	ENSG00000111669	332.79	-0.06	0.13	0.02
LMAN2	ENSG00000169223	287.41	-0.06	0.13	0.02
IL17RA	ENSG00000177663	260.09	0.07	0.13	0.02
TSC22D4	ENSG00000166925	251.97	0.06	0.13	0.02
ATPIF1	ENSG00000130770	240.63	0.07	0.13	0.02
IL10RA	ENSG00000110324	232.46	0.07	0.13	0.02
GLG1	ENSG00000090863	222.2	-0.07	0.13	0.02
NME2	ENSG00000011052	212.05	0.07	0.13	0.02
TXN2	ENSG00000100348	212	0.07	0.13	0.02
GSTK1	ENSG00000197448	168.53	0.08	0.13	0.02
UBL7	ENSG00000138629	159.96	-0.08	0.13	0.02
LENG8	ENSG00000167615	142.3	-0.08	0.13	0.02
RTFDC1	ENSG00000022277	135.06	-0.09	0.13	0.02
COPRS	ENSG00000172301	132	-0.09	0.13	0.02
RIC8A	ENSG00000177963	120.26	-0.09	0.13	0.02
COPS7A	ENSG00000111652	118.35	-0.09	0.13	0.02
ZBTB7B	ENSG00000160685	117.73	-0.09	0.13	0.02
CHFR	ENSG00000072609	110.77	0.09	0.13	0.02
SRM	ENSG00000116649	106.33	0.09	0.13	0.02
ANKFY1	ENSG00000185722	106.27	0.09	0.13	0.02
AP1G2	ENSG00000213983	101.22	-0.09	0.13	0.02
TPCN2	ENSG00000162341	100.12	0.09	0.13	0.02
NDUFA6	ENSG00000184983	98.13	-0.09	0.13	0.02
CNPPD1	ENSG00000115649	97.82	-0.1	0.13	0.02
IFNAR1	ENSG00000142166	93.28	0.1	0.13	0.02
NUDT16	ENSG00000198585	88.39	0.1	0.13	0.02
TRAF7	ENSG00000131653	87.01	0.1	0.13	0.02
LSP1	ENSG00000130592	778.6	-0.04	0.12	0.02
PPDPF	ENSG00000125534	624.91	-0.04	0.12	0.02
ATP5G2	ENSG00000135390	348.84	-0.05	0.12	0.02
P2RX4	ENSG00000135124	258.7	0.06	0.12	0.02
CTDSP1	ENSG00000144579	251.47	0.06	0.12	0.02
LSM4	ENSG00000130520	250.92	-0.06	0.12	0.02
NMT1	ENSG00000136448	242.52	0.06	0.12	0.02
PLEK	ENSG00000115956	233.91	0.06	0.12	0.02
GPAA1	ENSG00000197858	222.2	0.07	0.12	0.02
AKAP8L	ENSG00000011243	215.32	0.07	0.12	0.02
AP5Z1	ENSG00000242802	188.85	0.07	0.12	0.02
ARFGAP1	ENSG00000101199	184.27	-0.07	0.12	0.02
SCARB2	ENSG00000138760	156.48	0.08	0.12	0.02
RPS13	ENSG00000110700	156.21	0.08	0.12	0.02
VAMP5	ENSG00000168899	137.17	0.08	0.12	0.02
BID	ENSG00000015475	135.53	0.08	0.12	0.02
FAM134A	ENSG00000144567	128.79	0.08	0.12	0.02
ARL2	ENSG00000213465	127.48	0.08	0.12	0.02
PRPF6	ENSG00000101161	123.55	-0.08	0.12	0.02
HVCN1	ENSG00000122986	123.07	0.08	0.12	0.02
AHRR	ENSG00000063438	115.47	-0.08	0.12	0.02
SLC9A3R1	ENSG00000109062	112.36	0.09	0.12	0.02
NFATC2IP	ENSG00000176953	111.96	-0.08	0.12	0.02
DGKZ	ENSG00000149091	103.36	-0.08	0.12	0.02
PRR14	ENSG00000156858	102.18	0.09	0.12	0.02
GARS	ENSG00000106105	101.87	-0.09	0.12	0.02
LSM10	ENSG00000181817	98.84	-0.09	0.12	0.02
PPAP2B	ENSG00000162407	94.51	-0.09	0.12	0.02
PABPC1	ENSG00000070756	92.77	-0.1	0.12	0.02
EXOSC4	ENSG00000178896	82.8	-0.09	0.12	0.02
RGS19	ENSG00000171700	165.05	0.07	0.11	0.02
CSDE1	ENSG00000009307	149.36	-0.07	0.11	0.02
MARK2	ENSG00000072518	145.69	0.07	0.11	0.02
REEP5	ENSG00000129625	114.87	-0.08	0.11	0.02
MLLT6	ENSG00000108292	90.7	0.09	0.11	0.02
FAM20C	ENSG00000177706	413.24	0.05	0.11	0.01
GNB1	ENSG00000078369	402.56	0.05	0.11	0.01
WDR81	ENSG00000167716	266.1	0.05	0.11	0.01
DEDD2	ENSG00000160570	171.24	-0.06	0.11	0.01
PIK3CD	ENSG00000171608	125.41	0.07	0.11	0.01
TXNDC17	ENSG00000129235	125.33	0.07	0.11	0.01
GIPC1	ENSG00000123159	119.62	0.07	0.11	0.01
TRMT2A	ENSG00000099899	117.63	-0.07	0.11	0.01
C9orf69	ENSG00000238227	110.37	-0.08	0.11	0.01
CNPY2	ENSG00000257727	101.64	-0.08	0.11	0.01
PQBP1	ENSG00000102103	98.14	0.08	0.11	0.01
FLAD1	ENSG00000160688	84.58	0.08	0.11	0.01
MT-ND1	ENSG00000198888	891.38	0.2	0.1	0.01
COX5B	ENSG00000135940	635.81	-0.04	0.1	0.01
ATP5E	ENSG00000124172	586.19	-0.04	0.1	0.01
ANXA11	ENSG00000122359	571.36	0.04	0.1	0.01
NCF2	ENSG00000116701	490.84	0.04	0.1	0.01
RAD23A	ENSG00000179262	465.01	-0.04	0.1	0.01
STAT6	ENSG00000166888	410.97	0.04	0.1	0.01
ST3GAL1	ENSG00000008513	405.67	-0.04	0.1	0.01
LILRA2	ENSG00000239998	345.44	0.04	0.1	0.01
COMMD4	ENSG00000140365	315.61	-0.05	0.1	0.01
NDUFS6	ENSG00000145494	308.73	-0.05	0.1	0.01
MAF1	ENSG00000179632	294.55	-0.05	0.1	0.01
POLD4	ENSG00000175482	242.93	-0.05	0.1	0.01
RP11-201K10.3	ENSG00000273088	224.26	0.05	0.1	0.01
TMEM179B	ENSG00000185475	204.55	0.06	0.1	0.01
FLOT1	ENSG00000137312	195.45	0.06	0.1	0.01
GNS	ENSG00000135677	194.75	0.06	0.1	0.01
RAB20	ENSG00000139832	178.46	0.06	0.1	0.01
C1orf122	ENSG00000197982	168.43	0.06	0.1	0.01
COMMD9	ENSG00000110442	167.73	-0.06	0.1	0.01
MADD	ENSG00000110514	165.46	-0.06	0.1	0.01
TXNL4A	ENSG00000141759	160.13	-0.06	0.1	0.01
NAPRT1	ENSG00000147813	149.45	-0.06	0.1	0.01
SP100	ENSG00000067066	148.16	-0.06	0.1	0.01
RER1	ENSG00000157916	147.41	-0.06	0.1	0.01
NCL	ENSG00000115053	143.64	-0.06	0.1	0.01
N4BP1	ENSG00000102921	143.1	-0.06	0.1	0.01
HNRNPH3	ENSG00000096746	131.84	0.07	0.1	0.01
ADCY7	ENSG00000121281	130.14	-0.07	0.1	0.01
NISCH	ENSG00000010322	111.58	-0.07	0.1	0.01
MFSD10	ENSG00000109736	111.51	-0.07	0.1	0.01
RILP	ENSG00000167705	107	0.08	0.1	0.01
IMP3	ENSG00000177971	100.5	-0.08	0.1	0.01
TIMM8B	ENSG00000150779	99.81	-0.07	0.1	0.01
DHX9	ENSG00000135829	96.76	0.08	0.1	0.01
MRPL51	ENSG00000111639	95.78	0.08	0.1	0.01
PDHA1	ENSG00000131828	85.26	0.08	0.1	0.01
RAB31	ENSG00000168461	83.27	0.08	0.1	0.01
ATP6AP1	ENSG00000071553	815.4	0.03	0.09	0.01
BAG6	ENSG00000204463	275.35	0.04	0.09	0.01
RTF1	ENSG00000137815	242.66	-0.05	0.09	0.01
NFAM1	ENSG00000235568	233.09	0.05	0.09	0.01
SMARCA4	ENSG00000127616	229.18	0.05	0.09	0.01
SUMO3	ENSG00000184900	203.69	0.05	0.09	0.01
NPC2	ENSG00000119655	192.22	-0.05	0.09	0.01
EIF3G	ENSG00000130811	189.74	-0.05	0.09	0.01
ANP32B	ENSG00000136938	184.87	0.05	0.09	0.01
PLEKHO2	ENSG00000241839	167.49	0.05	0.09	0.01
NDUFS5	ENSG00000168653	145.28	-0.06	0.09	0.01
LAMTOR1	ENSG00000149357	144.31	0.06	0.09	0.01
CDK4	ENSG00000135446	142.51	-0.06	0.09	0.01
NARF	ENSG00000141562	142.25	-0.06	0.09	0.01
EFTUD2	ENSG00000108883	137.45	0.06	0.09	0.01
RP11-468E2.4	ENSG00000259529	127.94	0.06	0.09	0.01
CAMTA2	ENSG00000108509	127.77	0.06	0.09	0.01
PSMC3	ENSG00000165916	118.07	0.06	0.09	0.01
WWP2	ENSG00000198373	113.87	-0.07	0.09	0.01
TFE3	ENSG00000068323	112.05	0.07	0.09	0.01
CLTB	ENSG00000175416	111.21	-0.08	0.09	0.01
EI24	ENSG00000149547	107.21	0.07	0.09	0.01
DPM2	ENSG00000136908	103.98	0.06	0.09	0.01
ZFAND3	ENSG00000156639	99.38	-0.07	0.09	0.01
ERF	ENSG00000105722	94.65	0.07	0.09	0.01
CUX1	ENSG00000257923	93.66	0.07	0.09	0.01
ABTB1	ENSG00000114626	85.34	0.07	0.09	0.01
SDCBP	ENSG00000137575	84.26	0.08	0.09	0.01
KDELR2	ENSG00000136240	83.71	-0.07	0.09	0.01
CAP1	ENSG00000131236	83.45	-0.08	0.09	0.01
SERF2	ENSG00000140264	1433.16	0.03	0.08	0.01
BST2	ENSG00000130303	737.81	0.03	0.08	0.01
UBA52	ENSG00000221983	688.38	0.03	0.08	0.01
APLP2	ENSG00000084234	651.77	0.03	0.08	0.01
RPS14	ENSG00000164587	616.62	0.03	0.08	0.01
HELZ2	ENSG00000130589	496.79	-0.03	0.08	0.01
ARL6IP4	ENSG00000182196	372.72	0.04	0.08	0.01
PARP14	ENSG00000173193	366.84	0.04	0.08	0.01
DYNLRB1	ENSG00000125971	325.38	-0.04	0.08	0.01
FKBP15	ENSG00000119321	315.39	0.04	0.08	0.01
PLEKHM2	ENSG00000116786	311.11	-0.04	0.08	0.01
HNRNPUL1	ENSG00000105323	262.06	0.05	0.08	0.01
NDUFC2	ENSG00000151366	251.61	0.04	0.08	0.01
TMEM127	ENSG00000135956	205.97	0.04	0.08	0.01
PSMD13	ENSG00000185627	199.54	0.05	0.08	0.01
PRPF8	ENSG00000174231	184.33	-0.05	0.08	0.01
MTCH1	ENSG00000137409	174.97	-0.05	0.08	0.01
INPP5D	ENSG00000168918	165.77	-0.05	0.08	0.01
ATP6V0E1	ENSG00000113732	153.49	-0.05	0.08	0.01
NAP1L4	ENSG00000205531	144.97	-0.05	0.08	0.01
TRMT1	ENSG00000104907	121.16	0.06	0.08	0.01
CC2D1A	ENSG00000132024	119.08	-0.06	0.08	0.01
CD300E	ENSG00000186407	111.5	0.06	0.08	0.01
GBF1	ENSG00000107862	111.31	0.06	0.08	0.01
STX16	ENSG00000124222	110.22	-0.06	0.08	0.01
PHF23	ENSG00000040633	109.91	0.06	0.08	0.01
CXXC1	ENSG00000154832	106.96	0.06	0.08	0.01
NFATC3	ENSG00000072736	105.16	0.06	0.08	0.01
SCRIB	ENSG00000180900	100.68	0.06	0.08	0.01
SEPHS2	ENSG00000179918	99.25	0.06	0.08	0.01
LARP4B	ENSG00000107929	89.46	0.06	0.08	0.01
GPX4	ENSG00000167468	2198.61	0.02	0.07	0.01
TAPBP	ENSG00000231925	765.74	0.03	0.07	0.01
ZBTB7A	ENSG00000178951	479	0.03	0.07	0.01
MOB3A	ENSG00000172081	308.37	0.03	0.07	0.01
IRAK1	ENSG00000184216	307.92	0.03	0.07	0.01
ENSA	ENSG00000143420	258.63	-0.04	0.07	0.01
GPS1	ENSG00000169727	235.28	0.04	0.07	0.01
RP11-542C16.2	ENSG00000261915	225.91	0.04	0.07	0.01
GNG5	ENSG00000174021	220.39	0.04	0.07	0.01
EMC10	ENSG00000161671	201.67	0.04	0.07	0.01
MAD1L1	ENSG00000002822	194.64	0.04	0.07	0.01
EXOC3	ENSG00000180104	192.58	0.04	0.07	0.01
SNRPD2	ENSG00000125743	179.45	-0.04	0.07	0.01
RAC2	ENSG00000128340	177.14	-0.04	0.07	0.01
CHMP1A	ENSG00000131165	173.52	-0.05	0.07	0.01
KIAA2013	ENSG00000116685	172.63	0.05	0.07	0.01
SIL1	ENSG00000120725	166.23	0.04	0.07	0.01
NDUFA1	ENSG00000125356	162.96	0.04	0.07	0.01
RPS4X	ENSG00000198034	142.89	0.1	0.07	0.01
ATP5J2	ENSG00000241468	140.63	-0.05	0.07	0.01
DAZAP2	ENSG00000183283	138.3	-0.05	0.07	0.01
FLOT2	ENSG00000132589	131.22	-0.05	0.07	0.01
RPL13A	ENSG00000142541	127.18	0.05	0.07	0.01
RHOT2	ENSG00000140983	123.81	-0.05	0.07	0.01
CAST	ENSG00000153113	122.91	-0.05	0.07	0.01
ELOF1	ENSG00000130165	122.6	0.05	0.07	0.01
MRPL12	ENSG00000262814	119.89	-0.05	0.07	0.01
COASY	ENSG00000068120	119.39	0.05	0.07	0.01
GRK6	ENSG00000198055	118.87	-0.05	0.07	0.01
CMPK2	ENSG00000134326	117.27	0.05	0.07	0.01
PLA2G16	ENSG00000176485	116.22	-0.05	0.07	0.01
DDX39B	ENSG00000198563	115.59	-0.05	0.07	0.01
PPIL2	ENSG00000100023	113.74	-0.05	0.07	0.01
CDC123	ENSG00000151465	111.27	0.05	0.07	0.01
ZSWIM8	ENSG00000214655	111.2	0.05	0.07	0.01
PITPNA	ENSG00000174238	110.34	0.05	0.07	0.01
NPC1	ENSG00000141458	110.3	-0.05	0.07	0.01
SMPD1	ENSG00000166311	108.66	0.05	0.07	0.01
SKIV2L	ENSG00000204351	100.56	0.05	0.07	0.01
CTC-503J8.6	ENSG00000267427	95.24	-0.06	0.07	0.01
CANX	ENSG00000127022	90.2	-0.06	0.07	0.01
TRIM56	ENSG00000169871	90.1	0.06	0.07	0.01
DCTD	ENSG00000129187	89.69	0.06	0.07	0.01
IGHMBP2	ENSG00000132740	88.29	-0.06	0.07	0.01
MAU2	ENSG00000129933	87.83	-0.06	0.07	0.01
RPS6KA4	ENSG00000162302	85.21	-0.06	0.07	0.01
RPLP0	ENSG00000089157	84.41	-0.06	0.07	0.01
TXN	ENSG00000136810	83.54	-0.06	0.07	0.01
ATP5O	ENSG00000241837	82.56	0.07	0.07	0.01
RNASEK-C17orf49	ENSG00000161939	1587.6	-0.02	0.06	0.01
MMP14	ENSG00000157227	918	0.02	0.06	0.01
TALDO1	ENSG00000177156	525.35	0.02	0.06	0.01
RPL37A	ENSG00000197756	457.69	-0.03	0.06	0.01
SRRM2	ENSG00000167978	421.28	-0.03	0.06	0.01
AMDHD2	ENSG00000162066	392.62	-0.03	0.06	0.01
PRDX1	ENSG00000117450	278.54	-0.06	0.06	0.01
FAM32A	ENSG00000105058	254.71	0.03	0.06	0.01
AKT1	ENSG00000142208	227.11	-0.03	0.06	0.01
GPR108	ENSG00000125734	220.86	0.03	0.06	0.01
TXNRD1	ENSG00000198431	204.02	-0.03	0.06	0.01
HSF1	ENSG00000185122	202.87	-0.03	0.06	0.01
STAT5A	ENSG00000126561	182.79	0.03	0.06	0.01
IL6R	ENSG00000160712	179.64	0.04	0.06	0.01
UBE2M	ENSG00000130725	174.18	0.04	0.06	0.01
CCT7	ENSG00000135624	168.25	0.04	0.06	0.01
FBRS	ENSG00000156860	148.45	0.04	0.06	0.01
LMF2	ENSG00000100258	142.73	-0.04	0.06	0.01
TMEM109	ENSG00000110108	140.33	0.04	0.06	0.01
KIAA0513	ENSG00000135709	134.95	0.04	0.06	0.01
RNF187	ENSG00000168159	131.43	-0.04	0.06	0.01
TPM3	ENSG00000143549	125.77	0.04	0.06	0.01
RGL1	ENSG00000143344	125.39	-0.04	0.06	0.01
MTHFR	ENSG00000177000	122.2	0.04	0.06	0.01
TRIM22	ENSG00000132274	120.78	0.04	0.06	0.01
PARP6	ENSG00000137817	114.4	0.04	0.06	0.01
ATP5D	ENSG00000099624	113.26	-0.05	0.06	0.01
PAFAH1B2	ENSG00000168092	101.99	0.05	0.06	0.01
PELP1	ENSG00000141456	94.47	0.04	0.06	0.01
PISD	ENSG00000241878	93.92	-0.05	0.06	0.01
TRIM14	ENSG00000106785	92.45	0.05	0.06	0.01
CDS2	ENSG00000101290	92.42	0.05	0.06	0.01
SNORA76	ENSG00000266402	91.91	0.05	0.06	0.01
ORAI3	ENSG00000175938	89.42	-0.05	0.06	0.01
LZTR1	ENSG00000099949	88.04	0.05	0.06	0.01
GSR	ENSG00000104687	87.03	-0.05	0.06	0.01
SPRYD3	ENSG00000167778	85.47	0.05	0.06	0.01
TNFAIP3	ENSG00000118503	82.6	0.05	0.06	0.01
ISY1	ENSG00000240682	82.45	0.05	0.06	0.01
RPLP1	ENSG00000137818	1350.15	-0.02	0.05	0.01
RPL38	ENSG00000172809	349.53	-0.03	0.05	0.01
HNRNPM	ENSG00000099783	248.23	0.03	0.05	0.01
RABL6	ENSG00000196642	228.97	0.03	0.05	0.01
HOMER3	ENSG00000051128	210.41	0.03	0.05	0.01
SPAG7	ENSG00000091640	209.32	0.03	0.05	0.01
PSMB4	ENSG00000159377	188.8	-0.03	0.05	0.01
NUMA1	ENSG00000137497	185.83	0.03	0.05	0.01
PRRC2A	ENSG00000204469	178.5	0.03	0.05	0.01
C19orf24	ENSG00000228300	172.12	-0.03	0.05	0.01
DUSP23	ENSG00000158716	170.54	0.03	0.05	0.01
SSNA1	ENSG00000176101	158.41	0.03	0.05	0.01
SLC6A6	ENSG00000131389	151.73	-0.04	0.05	0.01
NDUFB8	ENSG00000166136	137.94	0.04	0.05	0.01
SF1	ENSG00000168066	137.6	-0.04	0.05	0.01
VPS4A	ENSG00000132612	123.68	-0.04	0.05	0.01
ITPA	ENSG00000125877	121.39	0.04	0.05	0.01
NMI	ENSG00000123609	116.69	0.04	0.05	0.01
LIMS1	ENSG00000169756	111.25	-0.04	0.05	0.01
MPV17	ENSG00000115204	109.81	-0.04	0.05	0.01
WDR6	ENSG00000178252	104.61	0.04	0.05	0.01
TMEM134	ENSG00000172663	92.75	-0.04	0.05	0.01
PUF60	ENSG00000179950	90.17	0.04	0.05	0.01
PHYKPL	ENSG00000175309	83.71	0.05	0.05	0.01
SOCS3	ENSG00000184557	83.68	0.05	0.05	0.01
ARF1	ENSG00000143761	608.4	0.02	0.05	0
DPP9	ENSG00000142002	324.2	0.02	0.05	0
TNIP1	ENSG00000145901	319.13	0.02	0.05	0
PFDN5	ENSG00000123349	260.12	0.03	0.05	0
UBE2I	ENSG00000103275	255.78	-0.03	0.05	0
RPS12	ENSG00000112306	223.76	-0.06	0.05	0
SZRD1	ENSG00000055070	216.88	0.03	0.05	0
SCAMP3	ENSG00000116521	166.26	-0.03	0.05	0
EMC7	ENSG00000134153	162.45	-0.03	0.05	0
DDT	ENSG00000099977	152.4	-0.03	0.05	0
TADA3	ENSG00000171148	141.85	0.03	0.05	0
KEAP1	ENSG00000079999	112.08	-0.03	0.05	0
NCSTN	ENSG00000162736	110.16	-0.04	0.05	0
CCND3	ENSG00000112576	104.12	-0.04	0.05	0
DGCR6L	ENSG00000128185	98.12	0.04	0.05	0
XXbac-BPG32J3.20	ENSG00000204422	92.69	-0.04	0.05	0
TMED9	ENSG00000184840	540.85	0.01	0.04	0
RAPGEF1	ENSG00000107263	540.54	0.02	0.04	0
G6PD	ENSG00000160211	415.65	0.02	0.04	0
ERP29	ENSG00000089248	393.59	0.06	0.04	0
CXCL16	ENSG00000161921	360.82	-0.02	0.04	0
TAGLN2	ENSG00000158710	352.32	-0.02	0.04	0
SNRNP70	ENSG00000104852	295.93	0.02	0.04	0
H2AFJ	ENSG00000246705	265.8	-0.02	0.04	0
TUFM	ENSG00000178952	265.41	0.02	0.04	0
DDX39A	ENSG00000123136	244.6	-0.02	0.04	0
SERP1	ENSG00000120742	237.63	-0.02	0.04	0
ASRGL1	ENSG00000162174	236.63	0.02	0.04	0
ADD1	ENSG00000087274	218.12	-0.02	0.04	0
POR	ENSG00000127948	206.57	-0.03	0.04	0
[truncated: 12,814 more rows]
