# Supplementary material for: Single cell analysis reveals human cytomegalovirus drives latently infected cells towards an anergic-like monocyte state
Source: eLife. 2020 Jan 22;9:e52168. doi: 10.7554/eLife.52168 (PMC7039680; doi:10.7554/eLife.52168)
Supplement: Figure 6—source data 2. [file elife-52168-fig6-data2.xlsx]

## Sheet: CD74-high-enriched pathways
Figure 6- source data 2: gene set enrichment analysis (GSEA) of genes showing higher expression in CD74high compared to CD74low monocytes
The table shows the number of genes (SIZE), the normalized enrichment score (NES), pValue (NOM p-val) and FDR (FDR q-val) for each pathway
NAME	SIZE	NES	NOM p-val	FDR q-val
GO_HUMORAL_IMMUNE_RESPONSE_MEDIATED_BY_CIRCULATING_IMMUNOGLOBULIN	23	2.40084	0	0.000131268
GO_ADAPTIVE_IMMUNE_RESPONSE	173	2.31055	0	0.00121861
GO_POSITIVE_T_CELL_SELECTION	15	2.22067	0	0.00501205
GO_COMPLEMENT_ACTIVATION	23	2.20791	0	0.00433007
REACTOME_PD1_SIGNALING	15	2.18973	0	0.00476034
GO_ADAPTIVE_IMMUNE_RESPONSE_BASED_ON_SOMATIC_RECOMBINATION_OF_IMMUNE_RECEPTORS_BUILT_FROM_IMMUNOGLOBULIN_SUPERFAMILY_DOMAINS	91	2.16268	0	0.00678582
GO_CELLULAR_RESPONSE_TO_INTERFERON_GAMMA	88	2.09356	0	0.0181957
GO_REGULATION_OF_ANTIGEN_RECEPTOR_MEDIATED_SIGNALING_PATHWAY	34	2.08774	0.000228206	0.0173064
GO_PROTEIN_ACTIVATION_CASCADE	31	2.07755	0	0.0181904
GO_REGULATION_OF_T_CELL_RECEPTOR_SIGNALING_PATHWAY	24	2.07617	0	0.0166986
GO_REGULATION_OF_LEUKOCYTE_PROLIFERATION	150	2.07342	0	0.0158326
GO_POSITIVE_REGULATION_OF_PHOSPHATASE_ACTIVITY	18	2.0661	0.000223065	0.0160571
GO_B_CELL_MEDIATED_IMMUNITY	48	2.01293	0	0.0318246
GO_LYMPHOCYTE_COSTIMULATION	52	2.00955	0	0.0309989
GO_B_CELL_RECEPTOR_SIGNALING_PATHWAY	33	2.009	0.00046083	0.0291218
GO_INTERFERON_GAMMA_MEDIATED_SIGNALING_PATHWAY	58	2.00298	0	0.0294583
GO_POSITIVE_REGULATION_OF_SMOOTH_MUSCLE_CELL_MIGRATION	24	1.99906	0.000226552	0.0292226
GO_REGULATION_OF_T_CELL_PROLIFERATION	108	1.99198	0	0.0301936
REACTOME_INTERFERON_GAMMA_SIGNALING	50	1.98884	0.000234907	0.0297938
GO_RESPONSE_TO_INTERFERON_GAMMA	107	1.98153	0	0.0307756
GO_REGULATION_OF_CELL_ACTIVATION	342	1.97703	0	0.0310891
GO_REGULATION_OF_CELL_CELL_ADHESION	262	1.97521	0	0.0304943
GO_REGULATION_OF_CALCIUM_ION_TRANSPORT	124	1.97456	0	0.0294626
GO_REGULATION_OF_HOMOTYPIC_CELL_CELL_ADHESION	221	1.9663	0	0.0311881
GO_POSITIVE_REGULATION_OF_ERK1_AND_ERK2_CASCADE	90	1.96569	0	0.03019
GO_VITAMIN_TRANSPORT	19	1.95726	0.000432152	0.0322745
REACTOME_GENERATION_OF_SECOND_MESSENGER_MOLECULES	22	1.94547	0.000672947	0.0362058
GO_HUMORAL_IMMUNE_RESPONSE	73	1.94322	0.000243843	0.0357536
GO_REGULATION_OF_CYTOKINE_SECRETION	102	1.93565	0	0.0379712
REACTOME_NCAM1_INTERACTIONS	19	1.92501	0.000679964	0.0419908
GO_NEGATIVE_REGULATION_OF_CALCIUM_ION_TRANSPORT_INTO_CYTOSOL	15	1.90326	0.00174902	0.052539
GO_NEGATIVE_REGULATION_OF_LEUKOCYTE_PROLIFERATION	51	1.89795	0	0.0538927
GO_RESPONSE_TO_PH	21	1.89609	0.000669942	0.0533744
GO_CALCIUM_ION_TRANSPORT	130	1.89402	0	0.0531921
GO_CALCIUM_ION_IMPORT	45	1.89074	0.000235294	0.053594
GO_PROTEIN_TRIMERIZATION	31	1.88996	0.00185787	0.0525678
GO_REGULATION_OF_INTERFERON_GAMMA_PRODUCTION	70	1.88663	0.00023872	0.0532571
GO_FOREBRAIN_CELL_MIGRATION	36	1.87881	0.000919752	0.056459
GO_POSITIVE_REGULATION_OF_CELL_ACTIVATION	214	1.87735	0	0.0559703
GO_PHOSPHOLIPASE_C_ACTIVATING_G_PROTEIN_COUPLED_RECEPTOR_SIGNALING_PATHWAY	25	1.86976	0.00203851	0.059213
GO_REGULATION_OF_HUMORAL_IMMUNE_RESPONSE	27	1.86871	0.00271309	0.0584584
GO_REGULATION_OF_INTERLEUKIN_12_PRODUCTION	41	1.86794	0.000697026	0.0575133
GO_LYMPHOCYTE_MIGRATION	29	1.86096	0.00201703	0.0606136
GO_POSITIVE_REGULATION_OF_CYTOKINE_SECRETION	70	1.85534	0.000239177	0.0629393
GO_REGULATION_OF_T_HELPER_CELL_DIFFERENTIATION	18	1.85426	0.00268516	0.0621997
REACTOME_NCAM_SIGNALING_FOR_NEURITE_OUT_GROWTH	41	1.8403	0.000697999	0.0707757
GO_GLUTATHIONE_METABOLIC_PROCESS	37	1.84	0.00182565	0.0694978
GO_POSITIVE_REGULATION_OF_T_CELL_PROLIFERATION	70	1.83828	0.000240442	0.0693421
GO_NEGATIVE_REGULATION_OF_ANTIGEN_RECEPTOR_MEDIATED_SIGNALING_PATHWAY	18	1.83296	0.00359066	0.0717163
GO_REGULATION_OF_INTERLEUKIN_1_PRODUCTION	47	1.83286	0.000233155	0.070339
GO_NEGATIVE_REGULATION_OF_FAT_CELL_DIFFERENTIATION	25	1.82697	0.00343721	0.0733758
GO_LYMPHOCYTE_MEDIATED_IMMUNITY	82	1.8251	0.000487924	0.0732858
GO_NEGATIVE_REGULATION_OF_CALCIUM_ION_TRANSPORT	31	1.81409	0.00322581	0.0802341
GO_DIVALENT_INORGANIC_CATION_TRANSPORT	164	1.81335	0	0.0793473
GO_POSITIVE_REGULATION_OF_CELL_CELL_ADHESION	169	1.81228	0	0.0786378
GO_MONOCYTE_CHEMOTAXIS	23	1.8119	0.00394132	0.0775426
GO_CELLULAR_RESPONSE_TO_VASCULAR_ENDOTHELIAL_GROWTH_FACTOR_STIMULUS	21	1.80612	0.0050885	0.0807092
REACTOME_EXTRACELLULAR_MATRIX_ORGANIZATION	39	1.80477	0.00423829	0.0803264
GO_REGULATION_OF_STAT_CASCADE	75	1.80186	0.000243487	0.081367
GO_POSITIVE_REGULATION_OF_IMMUNE_RESPONSE	423	1.79729	0	0.0836653
GO_NEGATIVE_REGULATION_OF_ENDOCYTOSIS	31	1.79645	0.00229043	0.0830476
GO_RESPONSE_TO_PROSTAGLANDIN_E	18	1.79216	0.00481295	0.0854651
GO_T_CELL_SELECTION	27	1.79207	0.00504819	0.0841922
GO_RESPONSE_TO_AXON_INJURY	29	1.79194	0.00273224	0.0830076
GO_RESPONSE_TO_PROSTAGLANDIN	22	1.79161	0.00505494	0.0819893
GO_INNATE_IMMUNE_RESPONSE	398	1.79086	0	0.0813944
GO_REGULATION_OF_PROTEIN_ACTIVATION_CASCADE	18	1.78841	0.00426105	0.0821385
GO_REGULATION_OF_ACUTE_INFLAMMATORY_RESPONSE	40	1.78782	0.00161439	0.0814674
GO_REGULATION_OF_CD4_POSITIVE_ALPHA_BETA_T_CELL_ACTIVATION	27	1.78551	0.00520362	0.0821388
GO_NEGATIVE_REGULATION_OF_LEUKOCYTE_APOPTOTIC_PROCESS	34	1.78331	0.00253281	0.0826664
GO_NEGATIVE_REGULATION_OF_T_CELL_PROLIFERATION	38	1.78198	0.00327562	0.0825326
GO_NEGATIVE_REGULATION_OF_RECEPTOR_ACTIVITY	20	1.77857	0.00375193	0.0839936
GO_NEGATIVE_REGULATION_OF_CATION_TRANSMEMBRANE_TRANSPORT	41	1.77847	0.00225989	0.0829356
GO_REGULATION_OF_ACTIVATED_T_CELL_PROLIFERATION	26	1.77611	0.00411994	0.0835549
GO_POSITIVE_REGULATION_OF_INTERLEUKIN_12_PRODUCTION	25	1.7718	0.00418779	0.0859274
GO_B_CELL_PROLIFERATION	15	1.77127	0.00635965	0.0852469
GO_POSITIVE_REGULATION_OF_CELL_ADHESION	255	1.76915	0	0.0858009
GO_REGULATION_OF_T_CELL_MIGRATION	19	1.7666	0.00548486	0.0868038
GO_REGULATION_OF_NEUTROPHIL_MIGRATION	23	1.75634	0.00850873	0.0945871
GO_REGULATION_OF_CALCIUM_ION_IMPORT	59	1.75592	0.00193611	0.0938089
GO_REGULATION_OF_DIGESTIVE_SYSTEM_PROCESS	15	1.7545	0.00821857	0.093807
GO_REGULATION_OF_INTERLEUKIN_1_BETA_PRODUCTION	39	1.74561	0.00370628	0.10089
GO_GLUTAMINE_FAMILY_AMINO_ACID_CATABOLIC_PROCESS	16	1.74039	0.00898729	0.104573
GO_ALPHA_AMINO_ACID_CATABOLIC_PROCESS	65	1.73964	0.00167104	0.104069
GO_POSITIVE_REGULATION_OF_LEUKOCYTE_PROLIFERATION	98	1.7367	0.00074239	0.105638
GO_RESPONSE_TO_FATTY_ACID	57	1.73436	0.00166905	0.106737
GO_LYMPHOCYTE_CHEMOTAXIS	22	1.7334	0.00912937	0.106504
GO_REGULATION_OF_LAMELLIPODIUM_ASSEMBLY	19	1.73094	0.0104934	0.10777
REACTOME_ANTIGEN_ACTIVATES_B_CELL_RECEPTOR_LEADING_TO_GENERATION_OF_SECOND_MESSENGERS	29	1.72996	0.00828157	0.107471
GO_POSITIVE_REGULATION_OF_INTERFERON_GAMMA_PRODUCTION	51	1.72929	0.00282353	0.106907
GO_REGULATION_OF_B_CELL_PROLIFERATION	42	1.72902	0.00555684	0.105976
GO_EPITHELIAL_CELL_MORPHOGENESIS	24	1.72882	0.00707763	0.105028
GO_CYTOKINE_MEDIATED_SIGNALING_PATHWAY	316	1.72864	0	0.104077
GO_DETECTION_OF_ABIOTIC_STIMULUS	43	1.7278	0.00602689	0.10379
GO_REGULATION_OF_ERK1_AND_ERK2_CASCADE	136	1.72342	0.000260213	0.106872
GO_REGULATION_OF_PHOSPHOLIPID_METABOLIC_PROCESS	46	1.7232	0.00304878	0.105946
GO_GLIAL_CELL_DEVELOPMENT	49	1.71768	0.00466527	0.110187
GO_MODIFIED_AMINO_ACID_TRANSPORT	19	1.71756	0.0118119	0.109197
GO_POSITIVE_REGULATION_OF_PROTEIN_KINASE_B_SIGNALING	56	1.71677	0.00381588	0.108916
GO_NEGATIVE_REGULATION_OF_CELL_CELL_ADHESION	91	1.71481	0.000994777	0.109771
REACTOME_COLLAGEN_FORMATION	24	1.71433	0.0094123	0.109202
GO_ACTIVATION_OF_IMMUNE_RESPONSE	324	1.70877	0	0.113585
GO_NEGATIVE_REGULATION_OF_CELL_ACTIVATION	114	1.70857	0.00077101	0.112685
GO_NEGATIVE_REGULATION_OF_CATION_CHANNEL_ACTIVITY	25	1.70738	0.00740242	0.112757
GO_REGULATION_OF_SMOOTH_MUSCLE_CELL_MIGRATION	36	1.70622	0.00713464	0.112829
GO_CELLULAR_AMINO_ACID_CATABOLIC_PROCESS	81	1.70602	0.00149068	0.111948
REACTOME_INTERFERON_ALPHA_BETA_SIGNALING	47	1.70593	0.00258337	0.110981
GO_REGULATION_OF_VIRAL_ENTRY_INTO_HOST_CELL	20	1.70484	0.0100159	0.110992
REACTOME_GLUTATHIONE_CONJUGATION	16	1.70478	0.0157813	0.110056
GO_APOPTOTIC_CELL_CLEARANCE	22	1.70379	0.00958751	0.110008
GO_POSITIVE_REGULATION_OF_TRANSCRIPTION_FACTOR_IMPORT_INTO_NUCLEUS	39	1.70365	0.00437083	0.109153
GO_REGULATION_OF_CELL_ADHESION	431	1.69978	0	0.111812
GO_REGULATION_OF_ANTIGEN_PROCESSING_AND_PRESENTATION	19	1.69888	0.0115607	0.111719
GO_REGULATION_OF_INFLAMMATORY_RESPONSE	188	1.69879	0	0.110832
GO_REGULATION_OF_GRANULOCYTE_CHEMOTAXIS	27	1.69877	0.00761478	0.10988
GO_FAT_SOLUBLE_VITAMIN_METABOLIC_PROCESS	15	1.69608	0.0166113	0.111497
GO_NEGATIVE_REGULATION_OF_HOMEOSTATIC_PROCESS	96	1.69584	0.00074869	0.110781
GO_NEGATIVE_REGULATION_OF_HOMOTYPIC_CELL_CELL_ADHESION	72	1.68915	0.0026455	0.116394
GO_POSITIVE_REGULATION_OF_NEUTROPHIL_MIGRATION	22	1.68702	0.0145092	0.117558
GO_NEGATIVE_REGULATION_OF_STAT_CASCADE	24	1.68596	0.0130985	0.117576
GO_REGULATION_OF_NATURAL_KILLER_CELL_MEDIATED_IMMUNITY	27	1.68504	0.0108744	0.117526
GO_CELLULAR_RESPONSE_TO_CYTOKINE_STIMULUS	427	1.68434	0	0.117244
GO_AXON_EXTENSION	24	1.68283	0.00883392	0.117733
GO_CELLULAR_RESPONSE_TO_KETONE	48	1.68177	0.00566171	0.117817
GO_MULTICELLULAR_ORGANISM_METABOLIC_PROCESS	44	1.68076	0.00619266	0.117863
GO_AMINOGLYCAN_BIOSYNTHETIC_PROCESS	66	1.67709	0.00517114	0.120617
REACTOME_DOWNSTREAM_TCR_SIGNALING	28	1.67305	0.01405	0.123833
GO_NEGATIVE_REGULATION_OF_TRANSMEMBRANE_TRANSPORT	58	1.67186	0.00544766	0.124103
GO_REGULATION_OF_T_HELPER_1_TYPE_IMMUNE_RESPONSE	16	1.67121	0.0188307	0.123832
GO_ACTIVATION_OF_ADENYLATE_CYCLASE_ACTIVITY	18	1.6693	0.0157446	0.124827
GO_GLUCOSE_6_PHOSPHATE_METABOLIC_PROCESS	17	1.66718	0.015646	0.126024
GO_LYMPHOCYTE_DIFFERENTIATION	149	1.66702	0	0.12522
GO_B_CELL_ACTIVATION	87	1.66543	0.000755667	0.125884
GO_POSITIVE_REGULATION_OF_EPITHELIAL_CELL_PROLIFERATION	89	1.66532	0.00196319	0.125073
GO_POSITIVE_REGULATION_OF_EPIDERMIS_DEVELOPMENT	18	1.66373	0.0176933	0.125783
GO_POSITIVE_REGULATION_OF_INTERLEUKIN_1_PRODUCTION	30	1.65798	0.0118451	0.130792
GO_REGULATION_OF_EPIDERMIS_DEVELOPMENT	34	1.65556	0.00855689	0.132387
GO_CALCIUM_ION_TRANSMEMBRANE_TRANSPORT	92	1.6554	0.00172712	0.131606
GO_GLUTAMATE_METABOLIC_PROCESS	22	1.65418	0.0167535	0.132046
GO_REGULATION_OF_PHOSPHATIDYLINOSITOL_3_KINASE_ACTIVITY	29	1.65415	0.0126582	0.13114
GO_POSITIVE_REGULATION_OF_RESPONSE_TO_EXTERNAL_STIMULUS	206	1.65324	0	0.131194
REACTOME_CD28_CO_STIMULATION	27	1.65161	0.0147684	0.132023
GO_RESPONSE_TO_KETONE	120	1.65142	0.00155723	0.131302
GO_LYMPHOCYTE_ACTIVATION	260	1.65047	0	0.131339
GO_REGULATION_OF_CALCIUM_ION_TRANSPORT_INTO_CYTOSOL	51	1.64818	0.00828402	0.132922
GO_POSITIVE_REGULATION_OF_PEPTIDYL_TYROSINE_PHOSPHORYLATION	94	1.6463	0.000496155	0.134088
GO_CYTOSOLIC_CALCIUM_ION_TRANSPORT	35	1.64519	0.010994	0.134377
GO_GLUTAMINE_FAMILY_AMINO_ACID_METABOLIC_PROCESS	45	1.64286	0.00779405	0.136049
GO_REGULATION_OF_INTERLEUKIN_1_SECRETION	27	1.64242	0.0154616	0.135595
GO_ALPHA_BETA_T_CELL_ACTIVATION	38	1.64205	0.0124309	0.135076
GO_AMIDE_TRANSPORT	60	1.63996	0.00522565	0.136525
REACTOME_MHC_CLASS_II_ANTIGEN_PRESENTATION	76	1.63405	0.00292683	0.142066
GO_REGULATION_OF_MYOBLAST_DIFFERENTIATION	25	1.63293	0.0164835	0.142453
GO_REGULATION_OF_ION_HOMEOSTASIS	113	1.63042	0.00125786	0.144448
GO_POSITIVE_REGULATION_OF_LEUKOCYTE_MIGRATION	78	1.6291	0.00392831	0.145101
GO_POSITIVE_REGULATION_OF_CHEMOKINE_PRODUCTION	35	1.6279	0.0125087	0.14555
GO_POSITIVE_REGULATION_OF_CALCIUM_ION_TRANSPORT	60	1.6249	0.00553284	0.14808
REACTOME_COSTIMULATION_BY_THE_CD28_FAMILY	52	1.62317	0.00971564	0.14923
GO_REGULATION_OF_METAL_ION_TRANSPORT	190	1.6199	0.000271887	0.152132
GO_UNSATURATED_FATTY_ACID_BIOSYNTHETIC_PROCESS	35	1.61975	0.0161107	0.151362
GO_DIGESTIVE_SYSTEM_PROCESS	26	1.61717	0.0199512	0.153458
GO_SULFUR_COMPOUND_BIOSYNTHETIC_PROCESS	139	1.61544	0.00158604	0.15457
GO_ANTIGEN_PROCESSING_AND_PRESENTATION_OF_PEPTIDE_OR_POLYSACCHARIDE_ANTIGEN_VIA_MHC_CLASS_II	79	1.61406	0.00398307	0.155308
GO_ORGANIC_ACID_CATABOLIC_PROCESS	152	1.6115	0	0.157443
REACTOME_IMMUNOREGULATORY_INTERACTIONS_BETWEEN_A_LYMPHOID_AND_A_NON_LYMPHOID_CELL	41	1.61022	0.0146409	0.158013
GO_POSITIVE_REGULATION_OF_NF_KAPPAB_IMPORT_INTO_NUCLEUS	20	1.60874	0.0272584	0.158838
GO_POSITIVE_REGULATION_OF_CHEMOTAXIS	85	1.60666	0.00273564	0.160451
GO_CELLULAR_RESPONSE_TO_VITAMIN	18	1.60652	0.0284838	0.159649
GO_REGULATION_OF_IMMUNE_EFFECTOR_PROCESS	309	1.60494	0.000298864	0.160598
GO_CELL_JUNCTION_ORGANIZATION	108	1.60454	0.00357416	0.160174
GO_NEGATIVE_REGULATION_OF_TRANSPORTER_ACTIVITY	43	1.60349	0.0143918	0.160523
GO_STAT_CASCADE	38	1.60327	0.0150235	0.159889
GO_POSITIVE_REGULATION_OF_STAT_CASCADE	42	1.60316	0.0112097	0.159109
REACTOME_TCR_SIGNALING	43	1.60047	0.0126845	0.161426
GO_REGULATION_OF_SEQUESTERING_OF_CALCIUM_ION	68	1.59909	0.00628627	0.16227
GO_POSITIVE_REGULATION_OF_KIDNEY_DEVELOPMENT	17	1.59895	0.0298835	0.16154
REACTOME_IL_2_SIGNALING	34	1.59759	0.016756	0.162256
GO_CORTICAL_CYTOSKELETON_ORGANIZATION	32	1.59707	0.0191693	0.161983
GO_TRANSMISSION_OF_NERVE_IMPULSE	15	1.59652	0.0318152	0.161783
GO_CD4_POSITIVE_ALPHA_BETA_T_CELL_ACTIVATION	23	1.596	0.0270151	0.161533
GO_POSITIVE_REGULATION_OF_CALCIUM_ION_IMPORT	30	1.59563	0.0200228	0.161117
GO_REGULATION_OF_CYTOKINE_PRODUCTION	423	1.59293	0	0.163471
GO_POSITIVE_REGULATION_OF_CD4_POSITIVE_ALPHA_BETA_T_CELL_ACTIVATION	19	1.587	0.0278458	0.169835
GO_KERATAN_SULFATE_BIOSYNTHETIC_PROCESS	15	1.58405	0.0336391	0.172653
GO_CELLULAR_RESPONSE_TO_INTERLEUKIN_1	61	1.58377	0.00998811	0.172072
GO_NEGATIVE_REGULATION_OF_EPITHELIAL_CELL_DIFFERENTIATION	18	1.58225	0.0320285	0.173122
GO_REGULATION_OF_B_CELL_ACTIVATION	80	1.58125	0.00724813	0.173509
GO_POSITIVE_REGULATION_OF_DEPHOSPHORYLATION	31	1.58015	0.0202475	0.173998
GO_CELLULAR_RESPONSE_TO_OXYGEN_LEVELS	101	1.57931	0.0042832	0.174155
GO_RESPONSE_TO_INTERLEUKIN_1	85	1.57813	0.00451807	0.174784
GO_REGULATION_OF_CHEMOKINE_PRODUCTION	50	1.57725	0.0142224	0.175011
GO_IMMUNE_RESPONSE_REGULATING_CELL_SURFACE_RECEPTOR_SIGNALING_PATHWAY	248	1.57668	0	0.174822
GO_REGULATION_OF_PROTEIN_KINASE_B_SIGNALING	86	1.57578	0.00669975	0.175055
GO_NEGATIVE_REGULATION_OF_CYTOKINE_PRODUCTION	150	1.57422	0.000529381	0.17623
GO_SULFUR_COMPOUND_METABOLIC_PROCESS	249	1.57412	0.000569314	0.175455
GO_RESPONSE_TO_MECHANICAL_STIMULUS	131	1.57395	0.00257135	0.174786
REACTOME_PROTEIN_FOLDING	47	1.57338	0.0155221	0.17468
GO_MULTICELLULAR_ORGANISMAL_MACROMOLECULE_METABOLIC_PROCESS	38	1.57229	0.0180365	0.175162
GO_ACETYL_COA_METABOLIC_PROCESS	20	1.57022	0.0313761	0.177026
GO_GLIAL_CELL_DIFFERENTIATION	78	1.57006	0.00752427	0.176346
GO_INFLAMMATORY_RESPONSE	302	1.56848	0	0.177437
GO_REGULATION_OF_LEUKOCYTE_DIFFERENTIATION	166	1.56594	0.00134192	0.179877
GO_POSITIVE_REGULATION_OF_RESPONSE_TO_WOUNDING	103	1.56592	0.00546992	0.179013
GO_REGULATION_OF_ENDOCYTOSIS	146	1.56567	0.00238347	0.178463
GO_SINGLE_ORGANISM_CELL_ADHESION	310	1.56415	0.000295683	0.179575
GO_COFACTOR_TRANSPORT	22	1.56291	0.0261379	0.180332
GO_NEURON_PROJECTION_GUIDANCE	98	1.56195	0.00511247	0.180768
GO_PEPTIDYL_TYROSINE_MODIFICATION	122	1.56061	0.00360825	0.18162
GO_POSITIVE_REGULATION_OF_INFLAMMATORY_RESPONSE	71	1.56057	0.00853283	0.180798
GO_LEUKOCYTE_MEDIATED_IMMUNITY	111	1.55845	0.00512426	0.18278
GO_DENDRITIC_CELL_DIFFERENTIATION	24	1.55838	0.0321184	0.182
GO_RESPONSE_TO_TYPE_I_INTERFERON	51	1.55687	0.0161441	0.183141
GO_POSITIVE_REGULATION_OF_ENDOCYTOSIS	81	1.55613	0.00819469	0.183274
GO_NEGATIVE_REGULATION_OF_ION_TRANSPORT	77	1.55515	0.0137157	0.183756
GO_IMMUNE_EFFECTOR_PROCESS	344	1.55483	0	0.183306
GO_CALCIUM_ION_IMPORT_INTO_CYTOSOL	31	1.55412	0.0270332	0.183429
GO_CHEMOKINE_MEDIATED_SIGNALING_PATHWAY	40	1.55235	0.0207996	0.184882
REACTOME_INFLAMMASOMES	16	1.54959	0.0394177	0.187713
GO_REGULATION_OF_NEUTROPHIL_CHEMOTAXIS	20	1.54831	0.0352941	0.188657
GO_PHAGOCYTOSIS	138	1.54611	0.00368324	0.190861
GO_RESPONSE_TO_INTERFERON_ALPHA	17	1.54466	0.042654	0.191924
GO_EXTRACELLULAR_STRUCTURE_ORGANIZATION	166	1.54415	0.00106809	0.191728
GO_REGULATION_OF_RESPONSE_TO_WOUNDING	260	1.54396	0.000589449	0.191118
GO_POSITIVE_REGULATION_OF_IMMUNE_EFFECTOR_PROCESS	118	1.54162	0.0042951	0.193496
GO_POSITIVE_REGULATION_OF_INTERLEUKIN_1_BETA_PRODUCTION	26	1.54086	0.030843	0.193635
GO_REGULATION_OF_PEPTIDYL_TYROSINE_PHOSPHORYLATION	135	1.53686	0.00358148	0.198353
GO_SUBSTRATE_ADHESION_DEPENDENT_CELL_SPREADING	31	1.53676	0.0336364	0.197621
GO_POSITIVE_REGULATION_OF_ENDOTHELIAL_CELL_PROLIFERATION	44	1.53674	0.0175641	0.196786
GO_REGULATION_OF_TYROSINE_PHOSPHORYLATION_OF_STAT_PROTEIN	40	1.53623	0.0225911	0.196614
GO_CELL_SUBSTRATE_ADHESION	107	1.53563	0.00678222	0.196616
GO_CELL_VOLUME_HOMEOSTASIS	18	1.53317	0.0483207	0.199191
GO_ACTIN_FILAMENT_POLYMERIZATION	19	1.53211	0.0390779	0.199808
GO_ALPHA_BETA_T_CELL_DIFFERENTIATION	32	1.52978	0.0317279	0.202169
GO_CELLULAR_RESPONSE_TO_FATTY_ACID	34	1.52915	0.0233985	0.202182
GO_NEGATIVE_REGULATION_OF_CALCIUM_ION_IMPORT	16	1.52682	0.0483312	0.20463
REACTOME_TRANSMISSION_ACROSS_CHEMICAL_SYNAPSES	92	1.52396	0.00725	0.207909
GO_NEGATIVE_REGULATION_OF_INTERFERON_GAMMA_PRODUCTION	20	1.52395	0.0424581	0.207044
GO_POSITIVE_REGULATION_OF_LEUKOCYTE_CHEMOTAXIS	60	1.52368	0.0170141	0.206563
GO_REGULATION_OF_PHAGOCYTOSIS	46	1.52366	0.0195517	0.205732
GO_CELLULAR_RESPONSE_TO_ACID_CHEMICAL	109	1.52306	0.00642293	0.205723
GO_RESPONSE_TO_VITAMIN	67	1.5221	0.0132371	0.206222
GO_DENDRITIC_SPINE_DEVELOPMENT	15	1.52143	0.0508806	0.206314
GO_POSITIVE_REGULATION_OF_CYTOKINE_PRODUCTION	281	1.52044	0.000294291	0.206861
GO_CELLULAR_RESPONSE_TO_PROSTAGLANDIN_STIMULUS	15	1.52027	0.0461637	0.206276
GO_REGULATION_OF_LIPID_BIOSYNTHETIC_PROCESS	84	1.52017	0.0136192	0.205582
GO_ALCOHOL_CATABOLIC_PROCESS	41	1.51998	0.0275735	0.205011
GO_REGULATION_OF_GLYCOPROTEIN_METABOLIC_PROCESS	31	1.51902	0.0340593	0.205544
GO_FATTY_ACID_DERIVATIVE_BIOSYNTHETIC_PROCESS	26	1.5188	0.0396129	0.205022
GO_ENDOCYTOSIS	361	1.5172	0	0.206398
GO_NEGATIVE_CHEMOTAXIS	22	1.51639	0.0436428	0.206733
GO_REGULATION_OF_LIPID_STORAGE	33	1.51492	0.0361003	0.207983
GO_REGULATION_OF_LEUKOCYTE_MIGRATION	100	1.51059	0.00981626	0.213448
GO_B_CELL_DIFFERENTIATION	53	1.51043	0.0214017	0.212815
GO_NEGATIVE_REGULATION_OF_INTERLEUKIN_6_PRODUCTION	26	1.51038	0.0378256	0.21204
GO_TAXIS	262	1.50906	0.000292056	0.21316
GO_REGULATION_OF_DEFENSE_RESPONSE_TO_VIRUS_BY_VIRUS	28	1.50888	0.0396525	0.212579
GO_RESPONSE_TO_INCREASED_OXYGEN_LEVELS	20	1.50819	0.0468647	0.212816
GO_LUNG_MORPHOGENESIS	25	1.50703	0.0422441	0.213697
GO_REGULATION_OF_MAST_CELL_ACTIVATION	32	1.50629	0.0386179	0.213956
GO_SALIVARY_GLAND_DEVELOPMENT	20	1.50619	0.0467457	0.213277
GO_RESPONSE_TO_MOLECULE_OF_BACTERIAL_ORIGIN	235	1.50604	0.0014241	0.212678
GO_NEGATIVE_REGULATION_OF_IMMUNE_RESPONSE	82	1.5048	0.0116164	0.213696
GO_POSITIVE_REGULATION_OF_LOCOMOTION	280	1.5046	0.000580383	0.213189
GO_LEUKOCYTE_ACTIVATION	310	1.503	0	0.214671
GO_MOVEMENT_IN_ENVIRONMENT_OF_OTHER_ORGANISM_INVOLVED_IN_SYMBIOTIC_INTERACTION	68	1.50089	0.0147664	0.216971
GO_MONOSACCHARIDE_TRANSPORT	27	1.49675	0.041886	0.222206
REACTOME_NEURONAL_SYSTEM	136	1.49442	0.00790097	0.224843
GO_REGULATION_OF_CATION_CHANNEL_ACTIVITY	55	1.49385	0.0239223	0.224906
REACTOME_AXON_GUIDANCE	164	1.49283	0.00247117	0.225619
GO_REGULATION_OF_TYROSINE_PHOSPHORYLATION_OF_STAT3_PROTEIN	28	1.49279	0.0458716	0.224849
REACTOME_INTERFERON_SIGNALING	131	1.49264	0.00611621	0.224248
GO_NEGATIVE_REGULATION_OF_CELL_ADHESION	146	1.49162	0.0052356	0.22499
GO_DETECTION_OF_STIMULUS	120	1.49115	0.00765892	0.224857
GO_ACTIVATION_OF_PHOSPHOLIPASE_C_ACTIVITY	15	1.49112	0.0568259	0.224077
GO_NEGATIVE_REGULATION_OF_LIPID_BIOSYNTHETIC_PROCESS	31	1.49003	0.0404741	0.224928
GO_EXCRETION	18	1.48867	0.0612777	0.22616
GO_RESPONSE_TO_ALCOHOL	225	1.48848	0.00110865	0.22563
GO_POSITIVE_REGULATION_OF_INTERLEUKIN_1_SECRETION	21	1.48792	0.054372	0.225669
GO_REGULATION_OF_LEUKOCYTE_APOPTOTIC_PROCESS	65	1.4875	0.0209246	0.225482
REACTOME_SIGNALING_BY_SCF_KIT	68	1.48678	0.0184377	0.225766
GO_CELLULAR_COMPONENT_MAINTENANCE	16	1.48666	0.0652026	0.225152
GO_HETEROTYPIC_CELL_CELL_ADHESION	18	1.48663	0.0524788	0.224393
GO_SYNAPSE_ORGANIZATION	67	1.4863	0.0208435	0.224085
GO_LEUKOCYTE_CELL_CELL_ADHESION	190	1.48483	0.00350121	0.225468
GO_GLIOGENESIS	103	1.48474	0.0133737	0.224808
GO_NEGATIVE_REGULATION_OF_VIRAL_TRANSCRIPTION	21	1.4833	0.0525354	0.226216
GO_NEURON_PROJECTION_EXTENSION	36	1.4804	0.0400278	0.229806
REACTOME_CD28_DEPENDENT_PI3K_AKT_SIGNALING	19	1.47784	0.059623	0.232869
GO_REGULATION_OF_DENDRITIC_SPINE_MORPHOGENESIS	20	1.4772	0.0533513	0.233016
GO_CELLULAR_RESPONSE_TO_CORTICOSTEROID_STIMULUS	31	1.47713	0.0479484	0.232328
GO_REGULATION_OF_LYMPHOCYTE_DIFFERENTIATION	93	1.477	0.0154923	0.231726
GO_MONOCARBOXYLIC_ACID_CATABOLIC_PROCESS	72	1.47406	0.0199184	0.235431
GO_INTESTINAL_ABSORPTION	15	1.47313	0.0629887	0.236082
GO_REGULATION_OF_CHEMOTAXIS	119	1.47308	0.0105371	0.235358
GO_REGULATION_OF_LEUKOCYTE_MEDIATED_CYTOTOXICITY	43	1.47285	0.0329314	0.234913
GO_LEUKOCYTE_DIFFERENTIATION	214	1.47205	0.00169875	0.23531
GO_RENAL_SYSTEM_PROCESS	50	1.47128	0.0326061	0.235703
GO_NEGATIVE_REGULATION_OF_INFLAMMATORY_RESPONSE	66	1.47103	0.023601	0.235288
GO_REGULATION_OF_SUPEROXIDE_METABOLIC_PROCESS	16	1.46991	0.0649174	0.236221
REACTOME_CELL_SURFACE_INTERACTIONS_AT_THE_VASCULAR_WALL	61	1.46929	0.0265258	0.236423
GO_POSITIVE_REGULATION_OF_INTRINSIC_APOPTOTIC_SIGNALING_PATHWAY	49	1.46882	0.0329825	0.236373
GO_REGULATION_OF_MONOOXYGENASE_ACTIVITY	44	1.46565	0.0337982	0.240522
GO_CENTRAL_NERVOUS_SYSTEM_NEURON_DEVELOPMENT	39	1.46424	0.0405247	0.241933
GO_REGULATION_OF_FAT_CELL_DIFFERENTIATION	66	1.464	0.0236202	0.241509
GO_DNA_ALKYLATION	31	1.46388	0.0477714	0.240925
GO_REGULATION_OF_PROTEIN_BINDING	134	1.46354	0.010548	0.240683
GO_REGULATION_OF_EPITHELIAL_CELL_PROLIFERATION	174	1.46317	0.00483092	0.24048
REACTOME_GLYCOSAMINOGLYCAN_METABOLISM	69	1.46079	0.0251755	0.243528
GO_REGULATION_OF_RESPONSE_TO_INTERFERON_GAMMA	21	1.45766	0.0650444	0.247692
REACTOME_HS_GAG_BIOSYNTHESIS	18	1.45747	0.0706115	0.247181
REACTOME_POTASSIUM_CHANNELS	45	1.45729	0.0394157	0.246691
GO_NEGATIVE_REGULATION_OF_MUSCLE_CELL_DIFFERENTIATION	33	1.45607	0.0476739	0.247845
GO_CELLULAR_RESPONSE_TO_NUTRIENT	29	1.45591	0.0497446	0.247312
GO_RESPONSE_TO_TEMPERATURE_STIMULUS	101	1.45569	0.0146718	0.246892
GO_NEGATIVE_REGULATION_OF_IMMUNE_SYSTEM_PROCESS	267	1.45525	0.00234949	0.246774
GO_CELLULAR_MODIFIED_AMINO_ACID_METABOLIC_PROCESS	148	1.45432	0.0089568	0.247499
GO_ACTIN_FILAMENT_BASED_PROCESS	316	1.45223	0.000603682	0.25007
GO_NEGATIVE_REGULATION_OF_RESPONSE_TO_WOUNDING	96	1.45155	0.0175873	0.250355
GO_REGULATION_OF_NEURON_DEATH	180	1.45003	0.00514487	0.252032
GO_REGULATION_OF_ADAPTIVE_IMMUNE_RESPONSE	96	1.44872	0.0182221	0.253337
GO_POSITIVE_REGULATION_OF_ACTIVATED_T_CELL_PROLIFERATION	16	1.44863	0.0764719	0.252682
GO_METAL_ION_TRANSPORT	318	1.44828	0.000887311	0.252474
GO_POSITIVE_REGULATION_OF_ACUTE_INFLAMMATORY_RESPONSE	16	1.44801	0.0792588	0.252105
GO_POSITIVE_REGULATION_OF_LIPID_METABOLIC_PROCESS	81	1.44781	0.0191934	0.251648
GO_NEGATIVE_REGULATION_OF_PROTEIN_TYROSINE_KINASE_ACTIVITY	18	1.44744	0.0673985	0.251455
GO_FATTY_ACID_METABOLIC_PROCESS	206	1.44734	0.00301535	0.250828
GO_LEUKOCYTE_MIGRATION	180	1.44695	0.00614697	0.250699
GO_POSITIVE_REGULATION_OF_ACTIN_FILAMENT_POLYMERIZATION	51	1.44592	0.0341441	0.251632
GO_REGULATION_OF_LAMELLIPODIUM_ORGANIZATION	28	1.4443	0.0555048	0.253429
GO_ACTIN_POLYMERIZATION_OR_DEPOLYMERIZATION	32	1.44412	0.0520127	0.252957
GO_REGULATION_OF_CELL_MORPHOGENESIS	391	1.44325	0.000629129	0.25363
REACTOME_BIOLOGICAL_OXIDATIONS	57	1.44282	0.0342124	0.253554
GO_CELL_ACTIVATION	405	1.4426	0.000321234	0.253122
GO_CELL_MORPHOGENESIS_INVOLVED_IN_DIFFERENTIATION	291	1.44062	0.000619771	0.255627
GO_STEROID_METABOLIC_PROCESS	139	1.4404	0.0111515	0.255225
GO_SYNAPSE_ASSEMBLY	23	1.44024	0.0664564	0.254701
GO_RESPONSE_TO_WOUNDING	350	1.44021	0.000923077	0.253996
GO_OLIGODENDROCYTE_DIFFERENTIATION	35	1.43973	0.0560901	0.254006
GO_REGULATION_OF_TUMOR_NECROSIS_FACTOR_SUPERFAMILY_CYTOKINE_PRODUCTION	78	1.4393	0.0285505	0.253961
GO_CENTRAL_NERVOUS_SYSTEM_NEURON_AXONOGENESIS	15	1.43922	0.0847038	0.253344
GO_REGULATION_OF_PHOSPHOLIPASE_C_ACTIVITY	23	1.43884	0.0720461	0.253194
GO_BRANCHING_MORPHOGENESIS_OF_AN_EPITHELIAL_TUBE	73	1.43724	0.0288818	0.255079
GO_POSITIVE_REGULATION_OF_B_CELL_ACTIVATION	52	1.43722	0.0377629	0.25437
REACTOME_METABOLISM_OF_VITAMINS_AND_COFACTORS	45	1.43693	0.044523	0.254118
GO_POSITIVE_REGULATION_OF_REACTIVE_OXYGEN_SPECIES_METABOLIC_PROCESS	64	1.43341	0.0312131	0.259008
GO_ANTIGEN_RECEPTOR_MEDIATED_SIGNALING_PATHWAY	149	1.43239	0.00983182	0.259976
GO_POSITIVE_REGULATION_OF_MAPK_CASCADE	295	1.43202	0.00209393	0.259846
GO_PEPTIDYL_TYROSINE_AUTOPHOSPHORYLATION	31	1.42911	0.0584208	0.26392
GO_REGULATION_OF_ANOIKIS	20	1.42794	0.0736417	0.265085
GO_DICARBOXYLIC_ACID_METABOLIC_PROCESS	79	1.42786	0.020438	0.264467
REACTOME_GASTRIN_CREB_SIGNALLING_PATHWAY_VIA_PKC_AND_MAPK	97	1.4274	0.026616	0.264493
GO_OLIGODENDROCYTE_DEVELOPMENT	23	1.42685	0.0657983	0.264663
GO_T_CELL_DIFFERENTIATION	96	1.42654	0.0245073	0.264424
GO_ORGANONITROGEN_COMPOUND_CATABOLIC_PROCESS	239	1.42636	0.00411281	0.263989
GO_ENDODERM_DEVELOPMENT	45	1.42495	0.0471545	0.265548
GO_REGULATION_OF_CELL_MORPHOGENESIS_INVOLVED_IN_DIFFERENTIATION	222	1.42488	0.00584145	0.264923
GO_REGULATION_OF_KIDNEY_DEVELOPMENT	22	1.42473	0.0729375	0.264429
GO_NEGATIVE_REGULATION_OF_CELL_PROJECTION_ORGANIZATION	97	1.4234	0.0214037	0.265868
GO_NEGATIVE_REGULATION_OF_CALCIUM_ION_TRANSMEMBRANE_TRANSPORT	19	1.42298	0.0805877	0.265824
REACTOME_GPCR_LIGAND_BINDING	149	1.42296	0.0123166	0.265127
GO_SMALL_MOLECULE_CATABOLIC_PROCESS	245	1.4214	0.00367751	0.266957
GO_NEGATIVE_REGULATION_OF_CELL_DIFFERENTIATION	352	1.42082	0.00154321	0.267205
GO_CELL_GROWTH	92	1.42059	0.0231098	0.266856
GO_REGULATION_OF_IMMUNOGLOBULIN_PRODUCTION	33	1.41873	0.0582745	0.269198
GO_CELL_CELL_ADHESION	328	1.41871	0.000612182	0.268493
GO_DETECTION_OF_MECHANICAL_STIMULUS	16	1.41863	0.0900022	0.2679
GO_REGULATION_OF_TRANSMEMBRANE_TRANSPORT	240	1.41849	0.00285959	0.267393
REACTOME_FORMATION_OF_TUBULIN_FOLDING_INTERMEDIATES_BY_CCT_TRIC	17	1.41828	0.0848254	0.267008
REACTOME_ADAPTIVE_IMMUNE_SYSTEM	438	1.41815	0.000960922	0.266512
GO_POSITIVE_REGULATION_OF_DNA_BINDING	30	1.4181	0.0601143	0.265869
GO_POSITIVE_REGULATION_OF_CYTOSKELETON_ORGANIZATION	126	1.41808	0.0149556	0.265189
GO_MONOCARBOXYLIC_ACID_BIOSYNTHETIC_PROCESS	110	1.4177	0.0152234	0.265159
GO_REGULATION_OF_PHOSPHATIDYLINOSITOL_3_KINASE_SIGNALING	80	1.41743	0.026747	0.264881
REACTOME_SIGNALLING_TO_RAS	22	1.41705	0.0795941	0.264811
GO_REGULATION_OF_PRODUCTION_OF_MOLECULAR_MEDIATOR_OF_IMMUNE_RESPONSE	70	1.41702	0.0337023	0.264152
GO_POSITIVE_REGULATION_OF_LYMPHOCYTE_MIGRATION	20	1.41664	0.0796777	0.264067
GO_REGULATION_OF_ION_TRANSPORT	329	1.41615	0.0021322	0.264171
GO_REGULATION_OF_ALPHA_BETA_T_CELL_DIFFERENTIATION	34	1.41597	0.0608018	0.26376
REACTOME_NEF_MEDIATES_DOWN_MODULATION_OF_CELL_SURFACE_RECEPTORS_BY_RECRUITING_THEM_TO_CLATHRIN_ADAPTERS	19	1.41449	0.0813333	0.265486
GO_POSITIVE_REGULATION_OF_TYROSINE_PHOSPHORYLATION_OF_STAT3_PROTEIN	22	1.41437	0.0788243	0.26498
GO_MONOSACCHARIDE_METABOLIC_PROCESS	143	1.41403	0.0130412	0.264854
GO_POLYOL_BIOSYNTHETIC_PROCESS	20	1.41262	0.0849688	0.266445
GO_REGULATION_OF_TYPE_2_IMMUNE_RESPONSE	19	1.41091	0.0843455	0.268571
GO_RESPONSE_TO_BACTERIUM	318	1.41083	0.00301296	0.267998
GO_RESPONSE_TO_THYROID_HORMONE	15	1.41075	0.0914798	0.267434
GO_CELLULAR_RESPONSE_TO_AMINO_ACID_STIMULUS	36	1.40924	0.0660986	0.269247
REACTOME_CLASS_A1_RHODOPSIN_LIKE_RECEPTORS	108	1.40891	0.0258534	0.269113
GO_LEUKOCYTE_PROLIFERATION	57	1.40818	0.0398045	0.269622
GO_REGULATION_OF_T_CELL_DIFFERENTIATION	74	1.40741	0.0352885	0.270211
GO_DOPAMINE_RECEPTOR_SIGNALING_PATHWAY	16	1.40661	0.0886188	0.270856
GO_SEMAPHORIN_PLEXIN_SIGNALING_PATHWAY	25	1.40657	0.070009	0.270233
REACTOME_G_ALPHA_Q_SIGNALLING_EVENTS	79	1.40642	0.0367171	0.269808
GO_MORPHOGENESIS_OF_A_BRANCHING_STRUCTURE	91	1.40269	0.0261019	0.27537
GO_MONOCARBOXYLIC_ACID_METABOLIC_PROCESS	333	1.40249	0.00246154	0.275006
GO_NEGATIVE_REGULATION_OF_PEPTIDYL_TYROSINE_PHOSPHORYLATION	33	1.40249	0.0713474	0.27432
GO_REGULATION_OF_LEUKOCYTE_MEDIATED_IMMUNITY	125	1.40195	0.0172009	0.274516
GO_CYTOKINE_SECRETION	30	1.40089	0.0688464	0.275608
GO_REGULATION_OF_HEMOPOIESIS	229	1.40075	0.00928793	0.275153
GO_REGULATION_OF_CALCIUM_MEDIATED_SIGNALING	49	1.39932	0.0568953	0.276824
GO_NEGATIVE_REGULATION_OF_DEVELOPMENTAL_PROCESS	472	1.39831	0.000672269	0.277797
GO_FATTY_ACID_BIOSYNTHETIC_PROCESS	78	1.39772	0.032304	0.278123
GO_CARBOHYDRATE_TRANSPORT	54	1.39515	0.0564212	0.281732
GO_PROTEIN_AUTOPHOSPHORYLATION	145	1.39277	0.0202312	0.285128
GO_POSITIVE_REGULATION_OF_PHAGOCYTOSIS	32	1.39037	0.0747232	0.288608
GO_REGULATION_OF_SMOOTH_MUSCLE_CONTRACTION	28	1.38988	0.0814542	0.288783
GO_ERYTHROCYTE_DEVELOPMENT	16	1.38909	0.103656	0.289415
REACTOME_SEMAPHORIN_INTERACTIONS	53	1.38875	0.0540668	0.289294
GO_ENDODERM_FORMATION	33	1.38845	0.07122	0.289094
GO_IMPORT_INTO_CELL	25	1.3878	0.0906164	0.289519
GO_CELLULAR_CHEMICAL_HOMEOSTASIS	352	1.38735	0.00458435	0.289604
GO_CEREBRAL_CORTEX_RADIALLY_ORIENTED_CELL_MIGRATION	18	1.38667	0.0942513	0.290105
REACTOME_GABA_B_RECEPTOR_ACTIVATION	24	1.38596	0.0905574	0.290605
GO_REGULATION_OF_REACTIVE_OXYGEN_SPECIES_METABOLIC_PROCESS	113	1.38498	0.027188	0.291595
GO_REGULATION_OF_EPIDERMAL_CELL_DIFFERENTIATION	25	1.38477	0.0861678	0.291254
GO_POSITIVE_REGULATION_OF_LEUKOCYTE_DIFFERENTIATION	96	1.38475	0.0329481	0.29059
GO_CELL_JUNCTION_ASSEMBLY	79	1.38402	0.0373832	0.291142
GO_POSITIVE_REGULATION_OF_PROTEIN_SECRETION	142	1.3831	0.0187842	0.292033
REACTOME_CHEMOKINE_RECEPTORS_BIND_CHEMOKINES	34	1.3827	0.0774411	0.292059
GO_ESTABLISHMENT_OF_CELL_POLARITY	63	1.38187	0.0536053	0.292823
GO_POSITIVE_REGULATION_OF_BINDING	102	1.38171	0.0257179	0.292412
GO_REGULATION_OF_ANDROGEN_RECEPTOR_SIGNALING_PATHWAY	18	1.38117	0.10635	0.292663
GO_POSITIVE_REGULATION_OF_PHOSPHOLIPID_METABOLIC_PROCESS	29	1.38099	0.0860191	0.292292
GO_REGULATION_OF_LYMPHOCYTE_MEDIATED_IMMUNITY	88	1.38069	0.0357318	0.292165
GO_HOMOLOGOUS_CHROMOSOME_SEGREGATION	28	1.37965	0.0827807	0.293291
GO_MALE_MEIOSIS	21	1.3795	0.0952272	0.292868
GO_ADULT_LOCOMOTORY_BEHAVIOR	47	1.37905	0.0649504	0.292951
GO_POSITIVE_REGULATION_OF_DEFENSE_RESPONSE	285	1.37889	0.00387366	0.292563
GO_NEGATIVE_REGULATION_OF_TUMOR_NECROSIS_FACTOR_SUPERFAMILY_CYTOKINE_PRODUCTION	28	1.37672	0.0834884	0.295663
GO_MULTICELLULAR_ORGANISMAL_SIGNALING	49	1.37671	0.062633	0.294987
GO_RESPONSE_TO_TESTOSTERONE	27	1.37639	0.0808081	0.294842
GO_REGULATION_OF_STEROL_TRANSPORT	22	1.37599	0.0915587	0.294833
GO_LIPID_MODIFICATION	147	1.37593	0.0173103	0.29427
GO_INTERACTION_WITH_HOST	110	1.37478	0.0348133	0.295597
GO_ENDODERMAL_CELL_DIFFERENTIATION	27	1.37369	0.0906807	0.296854
GO_G_PROTEIN_COUPLED_RECEPTOR_SIGNALING_PATHWAY	322	1.37334	0.00551978	0.296773
GO_NEGATIVE_REGULATION_OF_SIGNAL_TRANSDUCTION_IN_ABSENCE_OF_LIGAND	21	1.3732	0.103319	0.296329
GO_NEGATIVE_REGULATION_OF_ALPHA_BETA_T_CELL_ACTIVATION	17	1.3724	0.107384	0.297075
GO_RESPONSE_TO_OSMOTIC_STRESS	45	1.37071	0.0611137	0.299337
GO_NEGATIVE_REGULATION_OF_DNA_DEPENDENT_DNA_REPLICATION	15	1.37066	0.111359	0.298752
REACTOME_THE_ROLE_OF_NEF_IN_HIV1_REPLICATION_AND_DISEASE_PATHOGENESIS	26	1.36894	0.088141	0.301094
GO_GLUCOSAMINE_CONTAINING_COMPOUND_METABOLIC_PROCESS	22	1.36838	0.103791	0.301414
GO_NECROTIC_CELL_DEATH	28	1.36769	0.089093	0.301985
GO_NEGATIVE_REGULATION_OF_DEFENSE_RESPONSE	104	1.36732	0.0367085	0.301952
GO_NEGATIVE_REGULATION_OF_MUSCLE_CELL_APOPTOTIC_PROCESS	18	1.36708	0.112315	0.301698
GO_ANTIGEN_PROCESSING_AND_PRESENTATION_OF_PEPTIDE_ANTIGEN	154	1.36691	0.0194942	0.301311
GO_REGULATION_OF_RYANODINE_SENSITIVE_CALCIUM_RELEASE_CHANNEL_ACTIVITY	17	1.36475	0.11304	0.304499
GO_NEGATIVE_REGULATION_OF_NEURON_DEATH	119	1.36473	0.0307341	0.303859
REACTOME_PREFOLDIN_MEDIATED_TRANSFER_OF_SUBSTRATE_TO_CCT_TRIC	23	1.3629	0.0950011	0.306489
GO_ORGANIC_HYDROXY_COMPOUND_CATABOLIC_PROCESS	46	1.36129	0.070591	0.308688
GO_ALPHA_AMINO_ACID_METABOLIC_PROCESS	163	1.35951	0.0191066	0.311202
GO_REGULATION_OF_DENDRITIC_SPINE_DEVELOPMENT	38	1.3592	0.085363	0.311076
GO_ZYMOGEN_ACTIVATION	88	1.35918	0.042132	0.31041
GO_FATTY_ACID_DERIVATIVE_METABOLIC_PROCESS	51	1.35887	0.0711575	0.310306
GO_CELL_CHEMOTAXIS	106	1.35779	0.0364909	0.311539
GO_NEGATIVE_REGULATION_OF_TOLL_LIKE_RECEPTOR_SIGNALING_PATHWAY	24	1.35534	0.107269	0.315323
GO_CELL_MORPHOGENESIS_INVOLVED_IN_NEURON_DIFFERENTIATION	200	1.35498	0.0169397	0.315291
GO_RUFFLE_ORGANIZATION	20	1.35489	0.109729	0.314757
GO_NEURON_PROJECTION_MORPHOGENESIS	216	1.35458	0.0169964	0.314623
GO_REGULATION_OF_LYMPHOCYTE_MIGRATION	29	1.35418	0.0896033	0.314678
GO_OVULATION_CYCLE	65	1.35363	0.0622466	0.315018
GO_REGULATION_OF_ACTIN_FILAMENT_BASED_PROCESS	211	1.35242	0.0151557	0.31656
GO_RESPONSE_TO_PROTOZOAN	15	1.34798	0.125718	0.324029
GO_POSITIVE_REGULATION_OF_TUMOR_NECROSIS_FACTOR_SUPERFAMILY_CYTOKINE_PRODUCTION	49	1.34688	0.0757929	0.325423
GO_REGULATION_OF_ACTION_POTENTIAL	16	1.34618	0.125466	0.32604
REACTOME_G_PROTEIN_BETA_GAMMA_SIGNALLING	21	1.34551	0.109476	0.326609
GO_REGULATION_OF_PROTEIN_SECRETION	255	1.34515	0.00858861	0.326606
REACTOME_SEMA4D_IN_SEMAPHORIN_SIGNALING	27	1.345	0.103503	0.32618
GO_LIPID_CATABOLIC_PROCESS	156	1.34496	0.0240523	0.325559
GO_LIPID_PHOSPHORYLATION	62	1.34413	0.0612342	0.326448
GO_REGULATION_OF_NITRIC_OXIDE_BIOSYNTHETIC_PROCESS	35	1.34382	0.0944432	0.326321
GO_CARBOHYDRATE_PHOSPHORYLATION	19	1.34306	0.117556	0.327078
GO_CLATHRIN_MEDIATED_ENDOCYTOSIS	27	1.34281	0.112196	0.326871
GO_NEGATIVE_REGULATION_OF_WOUND_HEALING	32	1.34253	0.100893	0.326689
GO_CELL_CELL_JUNCTION_ASSEMBLY	41	1.3415	0.0839658	0.327917
GO_RESPONSE_TO_FLUID_SHEAR_STRESS	28	1.34112	0.101351	0.327946
GO_CELLULAR_LIPID_CATABOLIC_PROCESS	105	1.34034	0.0429001	0.328732
REACTOME_CYTOKINE_SIGNALING_IN_IMMUNE_SYSTEM	223	1.34031	0.0166197	0.328106
GO_POSITIVE_REGULATION_OF_LIPID_KINASE_ACTIVITY	22	1.33988	0.111385	0.328235
GO_RESPONSE_TO_ESTRADIOL	93	1.33987	0.0510334	0.327566
REACTOME_DEGRADATION_OF_THE_EXTRACELLULAR_MATRIX	15	1.33936	0.127044	0.32784
GO_REGULATION_OF_PLATELET_ACTIVATION	19	1.3388	0.121568	0.328173
GO_REGULATION_OF_VASCULAR_ENDOTHELIAL_GROWTH_FACTOR_RECEPTOR_SIGNALING_PATHWAY	21	1.33875	0.118383	0.327591
GO_UNSATURATED_FATTY_ACID_METABOLIC_PROCESS	63	1.33851	0.0683171	0.327359
GO_ANTIGEN_PROCESSING_AND_PRESENTATION	180	1.33843	0.0248265	0.326846
GO_NEGATIVE_REGULATION_OF_AXON_EXTENSION	24	1.338	0.114279	0.326989
GO_ACTIVATION_OF_CYSTEINE_TYPE_ENDOPEPTIDASE_ACTIVITY	82	1.33784	0.0582905	0.326607
GO_NEGATIVE_REGULATION_OF_DEVELOPMENTAL_GROWTH	49	1.33759	0.0802628	0.326402
GO_GLUCOSE_METABOLIC_PROCESS	93	1.33701	0.0463918	0.326837
GO_REGULATION_OF_INTERLEUKIN_4_PRODUCTION	18	1.33584	0.12656	0.328349
GO_POSITIVE_REGULATION_OF_IMMUNOGLOBULIN_PRODUCTION	20	1.33579	0.128402	0.327784
GO_REGULATION_OF_VESICLE_MEDIATED_TRANSPORT	315	1.33528	0.00689655	0.328058
GO_CEREBRAL_CORTEX_CELL_MIGRATION	26	1.33527	0.113574	0.327403
GO_REGULATION_OF_EXTRACELLULAR_MATRIX_ORGANIZATION	19	1.33424	0.125112	0.328633
GO_CELLULAR_TRANSITION_METAL_ION_HOMEOSTASIS	58	1.33411	0.073692	0.328216
GO_FATTY_ACID_CATABOLIC_PROCESS	61	1.3339	0.0708243	0.327954
GO_REGULATION_OF_AXON_GUIDANCE	23	1.3335	0.122	0.328033
GO_REGULATION_OF_NEURON_APOPTOTIC_PROCESS	134	1.33281	0.0356394	0.328654
GO_NEGATIVE_REGULATION_OF_IMMUNE_EFFECTOR_PROCESS	74	1.33171	0.0669406	0.330069
GO_REGULATION_OF_BIOMINERAL_TISSUE_DEVELOPMENT	41	1.33108	0.0944973	0.330605
GO_REGULATION_OF_LEUKOCYTE_CHEMOTAXIS	67	1.33095	0.06386	0.330194
GO_NERVE_DEVELOPMENT	29	1.33083	0.113268	0.329777
GO_RESPONSE_TO_CARBOHYDRATE	111	1.32805	0.0444332	0.334326
GO_REGULATION_OF_INTERLEUKIN_10_PRODUCTION	32	1.32799	0.102806	0.333777
GO_POSITIVE_REGULATION_OF_LIPID_BIOSYNTHETIC_PROCESS	42	1.32735	0.0917153	0.334331
REACTOME_LYSOSOME_VESICLE_BIOGENESIS	22	1.32732	0.122032	0.333715
GO_VITAMIN_METABOLIC_PROCESS	82	1.32547	0.0609575	0.336599
GO_REGULATION_OF_VASCULATURE_DEVELOPMENT	139	1.32514	0.0356389	0.336574
GO_PROTEIN_HOMOTETRAMERIZATION	50	1.32421	0.0854236	0.337696
GO_REGULATION_OF_MACROPHAGE_ACTIVATION	16	1.32414	0.130965	0.337154
REACTOME_METABOLISM_OF_CARBOHYDRATES	170	1.32389	0.0289855	0.336972
GO_REGULATION_OF_INTERLEUKIN_6_PRODUCTION	77	1.32311	0.0666827	0.337818
GO_NEGATIVE_REGULATION_OF_VIRAL_PROCESS	74	1.32141	0.0636163	0.340383
GO_CELLULAR_RESPONSE_TO_INTERLEUKIN_4	20	1.32126	0.131731	0.340012
REACTOME_PHASE1_FUNCTIONALIZATION_OF_COMPOUNDS	22	1.32123	0.132991	0.339417
REACTOME_DEVELOPMENTAL_BIOLOGY	256	1.32015	0.0181191	0.340884
GO_PROSTANOID_METABOLIC_PROCESS	19	1.31961	0.13071	0.341286
GO_LIPOPOLYSACCHARIDE_MEDIATED_SIGNALING_PATHWAY	29	1.31858	0.116326	0.342581
GO_CELLULAR_RESPONSE_TO_ALKALOID	18	1.31769	0.135255	0.343666
GO_REGULATION_OF_MYELOID_CELL_APOPTOTIC_PROCESS	20	1.31675	0.132025	0.34485
GO_DIVALENT_INORGANIC_CATION_HOMEOSTASIS	201	1.31616	0.0205683	0.345331
GO_REGULATION_OF_RECEPTOR_ACTIVITY	75	1.31535	0.0707729	0.34621
GO_REGULATION_OF_LIPID_METABOLIC_PROCESS	188	1.31364	0.0282302	0.348865
GO_POSITIVE_REGULATION_OF_ACTIN_FILAMENT_BUNDLE_ASSEMBLY	30	1.3132	0.113729	0.349061
GO_REGULATION_OF_NON_CANONICAL_WNT_SIGNALING_PATHWAY	15	1.31283	0.145851	0.349106
GO_POSITIVE_REGULATION_OF_LYMPHOCYTE_DIFFERENTIATION	59	1.31264	0.0879509	0.348833
GO_REGULATION_OF_FIBROBLAST_MIGRATION	23	1.31245	0.133979	0.34854
GO_AMINOGLYCAN_METABOLIC_PROCESS	105	1.31139	0.0537389	0.349958
GO_CELL_MATRIX_ADHESION	72	1.31125	0.0759679	0.349555
REACTOME_SIGNALING_BY_PDGF	93	1.311	0.0588672	0.349383
GO_RESPONSE_TO_ACID_CHEMICAL	202	1.31042	0.0263905	0.34987
GO_EMBRYO_IMPLANTATION	26	1.31012	0.126349	0.349795
REACTOME_PHASE_II_CONJUGATION	35	1.3092	0.116532	0.350909
GO_RECEPTOR_MEDIATED_ENDOCYTOSIS	134	1.30872	0.045989	0.351181
GO_POSITIVE_REGULATION_OF_PROTEIN_POLYMERIZATION	68	1.30816	0.07896	0.351614
REACTOME_G_ALPHA_I_SIGNALLING_EVENTS	80	1.30795	0.072446	0.351383
GO_NEGATIVE_REGULATION_OF_RESPONSE_TO_EXTERNAL_STIMULUS	177	1.30759	0.0353629	0.351385
GO_REGULATION_OF_DNA_TEMPLATED_TRANSCRIPTION_IN_RESPONSE_TO_STRESS	60	1.30706	0.0861907	0.351754
GO_NEGATIVE_REGULATION_OF_RESPONSE_TO_CYTOKINE_STIMULUS	33	1.30689	0.119396	0.351427
GO_REGULATION_OF_MAST_CELL_ACTIVATION_INVOLVED_IN_IMMUNE_RESPONSE	26	1.30678	0.13172	0.350969
GO_REGULATION_OF_ENDOTHELIAL_CELL_PROLIFERATION	65	1.30655	0.0791959	0.350767
GO_REGULATION_OF_BINDING	218	1.30625	0.0263816	0.35073
GO_REGULATION_OF_ACTIN_FILAMENT_LENGTH	119	1.30586	0.0521717	0.350811
REACTOME_G_ALPHA1213_SIGNALLING_EVENTS	56	1.30567	0.0976888	0.350539
GO_I_KAPPAB_KINASE_NF_KAPPAB_SIGNALING	65	1.30554	0.0856124	0.350132
REACTOME_THROMBOXANE_SIGNALLING_THROUGH_TP_RECEPTOR	16	1.30245	0.149456	0.355512
GO_FATTY_ACID_BETA_OXIDATION	44	1.30153	0.106313	0.356672
GO_SKELETAL_MUSCLE_CONTRACTION	19	1.30114	0.141944	0.356779
GO_NEGATIVE_REGULATION_OF_SEQUENCE_SPECIFIC_DNA_BINDING_TRANSCRIPTION_FACTOR_ACTIVITY	105	1.29963	0.0578121	0.359134
GO_PROTEIN_ADP_RIBOSYLATION	16	1.29955	0.157301	0.358612
GO_ENTRAINMENT_OF_CIRCADIAN_CLOCK_BY_PHOTOPERIOD	17	1.2987	0.154601	0.35965
REACTOME_NEUROTRANSMITTER_RECEPTOR_BINDING_AND_DOWNSTREAM_TRANSMISSION_IN_THE_POSTSYNAPTIC_CELL	66	1.29865	0.0851825	0.359099
REACTOME_GABA_RECEPTOR_ACTIVATION	26	1.29819	0.137011	0.359339
REACTOME_G_BETA_GAMMA_SIGNALLING_THROUGH_PI3KGAMMA	19	1.29773	0.152983	0.359599
GO_POSITIVE_REGULATION_OF_ADAPTIVE_IMMUNE_RESPONSE	58	1.29683	0.0898301	0.36072
GO_POSITIVE_REGULATION_OF_CALCIUM_MEDIATED_SIGNALING	22	1.2966	0.141446	0.360524
GO_MECHANORECEPTOR_DIFFERENTIATION	27	1.29591	0.129531	0.361236
GO_CELLULAR_GLUCOSE_HOMEOSTASIS	53	1.29586	0.0956892	0.360676
GO_REGULATION_OF_CELLULAR_COMPONENT_SIZE	244	1.29477	0.0221591	0.362202
GO_MICROTUBULE_BUNDLE_FORMATION	37	1.29439	0.121789	0.362301
GO_REGULATION_OF_MEMBRANE_POTENTIAL	182	1.2939	0.0364037	0.362621
REACTOME_PTM_GAMMA_CARBOXYLATION_HYPUSINE_FORMATION_AND_ARYLSULFATASE_ACTIVATION	15	1.29377	0.158079	0.362234
GO_POSITIVE_REGULATION_OF_HEMOPOIESIS	121	1.29231	0.0613219	0.364526
GO_ION_HOMEOSTASIS	352	1.29221	0.0132534	0.364074
GO_NEGATIVE_REGULATION_OF_LIPID_STORAGE	15	1.2921	0.158332	0.36365
GO_SENSORY_PERCEPTION	210	1.29173	0.0267455	0.36373
GO_MEMBRANE_INVAGINATION	26	1.29125	0.140642	0.364029
GO_REGULATION_OF_CELL_PROJECTION_ORGANIZATION	381	1.2911	0.0106018	0.363688
GO_WOUND_HEALING	293	1.29071	0.0205541	0.363817
GO_DIGESTION	41	1.29068	0.117929	0.363219
GO_REGULATION_OF_MITOCHONDRIAL_MEMBRANE_POTENTIAL	45	1.29059	0.112751	0.362767
GO_DENDRITE_MORPHOGENESIS	29	1.29054	0.138002	0.362231
GO_PYRIMIDINE_DEOXYRIBONUCLEOTIDE_METABOLIC_PROCESS	16	1.29013	0.161618	0.362411
GO_NEGATIVE_REGULATION_OF_COAGULATION	26	1.28975	0.138539	0.36252
GO_TELENCEPHALON_DEVELOPMENT	126	1.28934	0.0591327	0.36273
GO_REGULATION_OF_OSSIFICATION	108	1.28757	0.0652834	0.365597
GO_REGULATION_OF_CYTOKINE_BIOSYNTHETIC_PROCESS	67	1.28727	0.0903241	0.365571
GO_RESPONSE_TO_INTERLEUKIN_4	24	1.28689	0.145638	0.36569
REACTOME_THROMBIN_SIGNALLING_THROUGH_PROTEINASE_ACTIVATED_RECEPTORS_PARS	22	1.28686	0.142825	0.365133
GO_POSITIVE_REGULATION_OF_LIPID_STORAGE	15	1.28638	0.162073	0.365448
GO_CARBOHYDRATE_BIOSYNTHETIC_PROCESS	91	1.28565	0.0738391	0.366294
GO_DICARBOXYLIC_ACID_TRANSPORT	47	1.28535	0.113409	0.366263
GO_REGULATION_OF_HOMEOSTATIC_PROCESS	297	1.28389	0.0198079	0.368555
GO_RESPONSE_TO_ESTROGEN	140	1.2837	0.0579332	0.36829
GO_REGULATION_OF_REACTIVE_OXYGEN_SPECIES_BIOSYNTHETIC_PROCESS	47	1.28354	0.117955	0.367999
REACTOME_NEUROTRANSMITTER_RELEASE_CYCLE	16	1.28254	0.171453	0.369342
GO_REGULATION_OF_T_CELL_APOPTOTIC_PROCESS	24	1.28242	0.143206	0.36896
GO_REGULATION_OF_CELL_SIZE	123	1.28204	0.0616126	0.369095
GO_PROTEIN_OLIGOMERIZATION	310	1.28128	0.0182815	0.369975
GO_REGULATION_OF_CYTOKINE_PRODUCTION_INVOLVED_IN_IMMUNE_RESPONSE	44	1.28079	0.120318	0.370324
GO_DETECTION_OF_LIGHT_STIMULUS	20	1.28076	0.155835	0.369752
GO_NEGATIVE_REGULATION_OF_OSSIFICATION	41	1.27917	0.122092	0.372319
GO_LOCOMOTORY_BEHAVIOR	92	1.27856	0.082535	0.372913
GO_POSITIVE_REGULATION_OF_CELL_SUBSTRATE_ADHESION	59	1.27853	0.107801	0.37233
GO_NEUROLOGICAL_SYSTEM_PROCESS	369	1.27825	0.0139492	0.372282
GO_FOLIC_ACID_CONTAINING_COMPOUND_METABOLIC_PROCESS	25	1.27783	0.151218	0.372509
GO_KERATAN_SULFATE_METABOLIC_PROCESS	20	1.27758	0.161838	0.372394
REACTOME_SEMA4D_INDUCED_CELL_MIGRATION_AND_GROWTH_CONE_COLLAPSE	22	1.27741	0.155856	0.372137
GO_FEMALE_SEX_DIFFERENTIATION	63	1.27628	0.105517	0.373809
GO_NEGATIVE_REGULATION_OF_LYMPHOCYTE_APOPTOTIC_PROCESS	21	1.27621	0.157219	0.373317
GO_PHOTOTRANSDUCTION	16	1.27607	0.170119	0.372961
GO_PROTEIN_HOMOOLIGOMERIZATION	175	1.2749	0.0516129	0.374716
GO_ENDOPLASMIC_RETICULUM_CALCIUM_ION_HOMEOSTASIS	20	1.27451	0.163051	0.374891
GO_RESPONSE_TO_REACTIVE_OXYGEN_SPECIES	143	1.2739	0.0591747	0.375475
GO_OSTEOBLAST_DIFFERENTIATION	82	1.27366	0.0913366	0.375351
GO_LEUKOTRIENE_METABOLIC_PROCESS	16	1.27229	0.16765	0.377513
GO_EPITHELIAL_CELL_DIFFERENTIATION	267	1.27202	0.0276726	0.37742
GO_POSITIVE_REGULATION_OF_EPITHELIAL_CELL_DIFFERENTIATION	30	1.27087	0.14733	0.379128
GO_FORMATION_OF_PRIMARY_GERM_LAYER	67	1.27067	0.102657	0.378908
GO_INOSITOL_PHOSPHATE_METABOLIC_PROCESS	45	1.26942	0.12948	0.380849
GO_REGULATION_OF_NEURON_DIFFERENTIATION	340	1.26932	0.0184729	0.380451
GO_REGULATION_OF_EPITHELIAL_CELL_DIFFERENTIATION	68	1.2686	0.10585	0.381295
REACTOME_IL_RECEPTOR_SHC_SIGNALING	21	1.26845	0.16144	0.380974
GO_AMINO_SUGAR_METABOLIC_PROCESS	33	1.26808	0.144786	0.38112
REACTOME_SIGNALING_BY_GPCR	285	1.26792	0.0291519	0.380818
GO_HISTONE_PHOSPHORYLATION	22	1.26771	0.167522	0.380653
GO_RESPONSE_TO_HYDROGEN_PEROXIDE	86	1.26756	0.0903927	0.38032
GO_AXON_REGENERATION	15	1.26755	0.180477	0.379719
GO_POSITIVE_REGULATION_OF_PRODUCTION_OF_MOLECULAR_MEDIATOR_OF_IMMUNE_RESPONSE	46	1.26679	0.128582	0.380672
GO_PLATELET_ACTIVATION	102	1.26631	0.0857782	0.381038
GO_CELLULAR_RESPONSE_TO_OSMOTIC_STRESS	15	1.26615	0.18593	0.380743
GO_NEGATIVE_REGULATION_OF_MULTI_ORGANISM_PROCESS	115	1.26576	0.0756388	0.38093
GO_REGULATION_OF_ERBB_SIGNALING_PATHWAY	61	1.26568	0.107366	0.380474
GO_CELLULAR_RESPONSE_TO_EXTERNAL_STIMULUS	203	1.26492	0.044407	0.381431
GO_POSITIVE_REGULATION_OF_BMP_SIGNALING_PATHWAY	18	1.26395	0.178611	0.382806
GO_RESPONSE_TO_MINERALOCORTICOID	21	1.26384	0.169712	0.382437
GO_POSITIVE_REGULATION_OF_PEPTIDYL_SERINE_PHOSPHORYLATION	55	1.26369	0.117926	0.382121
GO_POSITIVE_REGULATION_OF_FATTY_ACID_METABOLIC_PROCESS	16	1.26338	0.174634	0.382134
GO_POSITIVE_REGULATION_OF_PROTEIN_COMPLEX_ASSEMBLY	155	1.26334	0.057779	0.381619
GO_NEGATIVE_REGULATION_OF_T_CELL_DIFFERENTIATION	20	1.26329	0.171105	0.381101
GO_POSITIVE_REGULATION_OF_PROTEIN_COMPLEX_DISASSEMBLY	19	1.26303	0.175486	0.381037
GO_REGULATION_OF_INTERLEUKIN_8_SECRETION	15	1.26222	0.180907	0.382073
REACTOME_GPCR_DOWNSTREAM_SIGNALING	221	1.26204	0.0404755	0.381842
GO_POSITIVE_REGULATION_OF_PHOSPHATIDYLINOSITOL_3_KINASE_SIGNALING	34	1.26196	0.146864	0.381402
REACTOME_SIGNALING_BY_RHO_GTPASES	87	1.26142	0.0921117	0.381911
GO_OSSIFICATION	150	1.26102	0.0599369	0.382108
GO_REGULATION_OF_CYTOSOLIC_CALCIUM_ION_CONCENTRATION	107	1.26028	0.0852427	0.383028
GO_RESPONSE_TO_VITAMIN_D	20	1.25898	0.175358	0.385067
GO_PYRIMIDINE_CONTAINING_COMPOUND_CATABOLIC_PROCESS	25	1.25874	0.167767	0.384981
GO_CELLULAR_RESPONSE_TO_ALCOHOL	67	1.25864	0.114423	0.384595
GO_KERATINOCYTE_DIFFERENTIATION	40	1.25836	0.137063	0.384555
GO_ORGANIC_ACID_BIOSYNTHETIC_PROCESS	180	1.25798	0.0520631	0.384732
GO_POLYSACCHARIDE_CATABOLIC_PROCESS	18	1.25674	0.179441	0.386653
GO_REGULATION_OF_KERATINOCYTE_DIFFERENTIATION	17	1.25638	0.177335	0.386801
GO_GLUTAMINE_METABOLIC_PROCESS	18	1.25602	0.187071	0.386944
GO_NEGATIVE_REGULATION_OF_AXONOGENESIS	42	1.2558	0.138303	0.386803
REACTOME_SIGNALING_BY_ROBO_RECEPTOR	21	1.25512	0.17547	0.387594
GO_REGULATION_OF_CELL_SUBSTRATE_ADHESION	112	1.25491	0.0837388	0.387432
GO_MYELOID_LEUKOCYTE_MIGRATION	63	1.25431	0.117042	0.388051
GO_REGULATION_OF_COAGULATION	54	1.25394	0.1292	0.388226
GO_DNA_DEPENDENT_DNA_REPLICATION_MAINTENANCE_OF_FIDELITY	17	1.25352	0.183733	0.388469
GO_REGULATION_OF_GTPASE_ACTIVITY	483	1.25293	0.013468	0.389115
GO_REGULATION_OF_ANATOMICAL_STRUCTURE_SIZE	301	1.25195	0.0280401	0.390537
REACTOME_INNATE_IMMUNE_SYSTEM	188	1.25188	0.0608766	0.390065
GO_MULTICELLULAR_ORGANISMAL_MOVEMENT	27	1.25177	0.162624	0.389709
GO_POSITIVE_REGULATION_OF_PROTEIN_IMPORT	72	1.2509	0.108546	0.390918
GO_REGULATION_OF_RELEASE_OF_SEQUESTERED_CALCIUM_ION_INTO_CYTOSOL	43	1.25083	0.144796	0.390471
GO_PHAGOCYTOSIS_ENGULFMENT	18	1.25051	0.185618	0.390545
GO_POSITIVE_REGULATION_OF_ORGANELLE_ASSEMBLY	38	1.25036	0.147345	0.390264
GO_POSITIVE_REGULATION_OF_MONOOXYGENASE_ACTIVITY	20	1.24985	0.182713	0.390749
GO_REGULATION_OF_LIPID_KINASE_ACTIVITY	37	1.24958	0.151335	0.390707
GO_CATION_TRANSPORT	456	1.24916	0.0157429	0.390988
GO_REGULATION_OF_RESPONSE_TO_CYTOKINE_STIMULUS	113	1.24882	0.0965586	0.391085
GO_POSITIVE_REGULATION_OF_AMINE_TRANSPORT	17	1.24877	0.18807	0.390593
GO_RNA_STABILIZATION	25	1.24844	0.169005	0.390703
GO_NEURON_PROJECTION_DEVELOPMENT	317	1.24816	0.0294654	0.390699
GO_RESPONSE_TO_STEROID_HORMONE	317	1.24798	0.0294914	0.390482
GO_IMMUNE_SYSTEM_DEVELOPMENT	423	1.24794	0.0210697	0.38998
GO_MULTICELLULAR_ORGANISMAL_WATER_HOMEOSTASIS	22	1.24768	0.170011	0.389943
GO_CELLULAR_IRON_ION_HOMEOSTASIS	32	1.24745	0.158991	0.389822
GO_NEGATIVE_REGULATION_OF_TRANSPORT	296	1.24724	0.0350242	0.389677
GO_NEGATIVE_REGULATION_OF_CYTOKINE_BIOSYNTHETIC_PROCESS	19	1.24645	0.189422	0.390724
GO_CELLULAR_RESPONSE_TO_LIPID	303	1.24625	0.0323644	0.390548
GO_REGULATION_OF_SECRETION	418	1.24588	0.0183787	0.390735
GO_CELL_PART_MORPHOGENESIS	392	1.24564	0.0236518	0.390652
GO_NEURON_DEVELOPMENT	400	1.24561	0.024557	0.390139
GO_FOREBRAIN_DEVELOPMENT	188	1.24507	0.0586784	0.39067
GO_REGULATION_OF_CELL_KILLING	48	1.24408	0.14239	0.392124
REACTOME_HEPARAN_SULFATE_HEPARIN_HS_GAG_METABOLISM	33	1.24374	0.163151	0.392269
GO_POSITIVE_REGULATION_OF_PEPTIDASE_ACTIVITY	128	1.24178	0.0862338	0.395779
GO_RESPONSE_TO_CORTICOSTEROID	109	1.24177	0.094581	0.395223
GO_RESPONSE_TO_OXYGEN_LEVELS	222	1.24176	0.0489569	0.394673
GO_CELLULAR_HOMEOSTASIS	436	1.23964	0.021718	0.398454
GO_NUCLEOTIDE_SUGAR_METABOLIC_PROCESS	29	1.23931	0.173913	0.398562
GO_NEGATIVE_REGULATION_OF_PROTEIN_BINDING	61	1.23735	0.131842	0.402118
GO_SYNAPTIC_SIGNALING	183	1.23731	0.0673392	0.401612
GO_POLYSACCHARIDE_METABOLIC_PROCESS	58	1.23709	0.13403	0.40149
GO_STEROL_BIOSYNTHETIC_PROCESS	33	1.23697	0.167672	0.401149
GO_CELLULAR_RESPONSE_TO_INORGANIC_SUBSTANCE	97	1.23678	0.106046	0.400977
GO_NEGATIVE_REGULATION_OF_DNA_BIOSYNTHETIC_PROCESS	25	1.23649	0.186141	0.401
GO_CELLULAR_RESPONSE_TO_EXTRACELLULAR_STIMULUS	146	1.23576	0.0788306	0.401925
GO_CIRCULATORY_SYSTEM_PROCESS	188	1.23551	0.0685116	0.401878
GO_NEGATIVE_REGULATION_OF_CELL_MORPHOGENESIS_INVOLVED_IN_DIFFERENTIATION	73	1.2349	0.126815	0.402553
GO_REGULATION_OF_G_PROTEIN_COUPLED_RECEPTOR_PROTEIN_SIGNALING_PATHWAY	80	1.23457	0.123949	0.402676
GO_PERIPHERAL_NERVOUS_SYSTEM_DEVELOPMENT	36	1.23431	0.163852	0.402638
GO_REGULATION_OF_CELLULAR_RESPIRATION	17	1.23236	0.202005	0.406202
GO_POSITIVE_REGULATION_OF_CYCLIC_NUCLEOTIDE_METABOLIC_PROCESS	51	1.23213	0.150284	0.406106
GO_REGULATION_OF_SMALL_GTPASE_MEDIATED_SIGNAL_TRANSDUCTION	209	1.23122	0.0635143	0.40742
GO_RESPONSE_TO_INORGANIC_SUBSTANCE	328	1.23121	0.0377473	0.406854
GO_POSITIVE_REGULATION_OF_LYASE_ACTIVITY	29	1.23119	0.178049	0.406311
GO_NEGATIVE_REGULATION_OF_LIPID_METABOLIC_PROCESS	52	1.23036	0.146947	0.407494
GO_POSITIVE_REGULATION_OF_REACTIVE_OXYGEN_SPECIES_BIOSYNTHETIC_PROCESS	34	1.22862	0.169368	0.410552
GO_CELLULAR_RESPONSE_TO_CARBOHYDRATE_STIMULUS	56	1.22766	0.150048	0.412022
GO_STEROL_METABOLIC_PROCESS	81	1.22736	0.126303	0.412051
GO_REGULATION_OF_INTRINSIC_APOPTOTIC_SIGNALING_PATHWAY	125	1.2271	0.089226	0.41202
GO_PROTEIN_POLYMERIZATION	54	1.22703	0.146049	0.411581
GO_RESPONSE_TO_CALCIUM_ION	79	1.22661	0.127946	0.41188
GO_REGULATION_OF_MUSCLE_CELL_DIFFERENTIATION	93	1.2265	0.124145	0.411545
GO_ACTIN_FILAMENT_ORGANIZATION	131	1.22619	0.0918101	0.41165
GO_RESPONSE_TO_TUMOR_NECROSIS_FACTOR	178	1.2258	0.0730368	0.411896
GO_RESPONSE_TO_GROWTH_HORMONE	18	1.22165	0.211173	0.420192
GO_EXTRACELLULAR_MATRIX_DISASSEMBLY	44	1.2211	0.161395	0.420784
GO_POSITIVE_REGULATION_OF_FILOPODIUM_ASSEMBLY	17	1.22098	0.209513	0.420459
GO_NEGATIVE_REGULATION_OF_LOCOMOTION	165	1.2202	0.0953513	0.421537
GO_HEXOSE_METABOLIC_PROCESS	124	1.21982	0.102531	0.421758
GO_RESPONSE_TO_IRON_ION	27	1.21979	0.196205	0.421237
GO_POSITIVE_REGULATION_OF_VASOCONSTRICTION	15	1.21968	0.217438	0.420906
GO_REGULATION_OF_PROTEIN_POLYMERIZATION	135	1.21767	0.10086	0.424652
GO_NEGATIVE_REGULATION_OF_CELLULAR_RESPONSE_TO_INSULIN_STIMULUS	25	1.21743	0.202742	0.424566
GO_MITOCHONDRIAL_RNA_METABOLIC_PROCESS	27	1.21729	0.197039	0.424264
GO_REGULATION_OF_PROTEIN_MATURATION	54	1.21712	0.156339	0.424038
GO_NEGATIVE_REGULATION_OF_NEURON_DIFFERENTIATION	118	1.21596	0.113139	0.426007
GO_ACIDIC_AMINO_ACID_TRANSPORT	15	1.21596	0.227323	0.42542
REACTOME_LIPOPROTEIN_METABOLISM	18	1.21567	0.212567	0.425452
REACTOME_ADP_SIGNALLING_THROUGH_P2RY1	16	1.21382	0.223252	0.428907
GO_RESPONSE_TO_CADMIUM_ION	32	1.21334	0.189406	0.429386
GO_RECEPTOR_METABOLIC_PROCESS	61	1.21288	0.15733	0.429807
GO_REGULATION_OF_MAP_KINASE_ACTIVITY	233	1.21158	0.0714884	0.432094
GO_NEGATIVE_REGULATION_OF_NEURON_APOPTOTIC_PROCESS	93	1.21152	0.129135	0.431629
GO_LEUKOCYTE_CHEMOTAXIS	76	1.21111	0.139354	0.431939
GO_REGULATION_OF_MAPK_CASCADE	427	1.21082	0.0321847	0.43199
GO_POSITIVE_REGULATION_OF_PROTEIN_TYROSINE_KINASE_ACTIVITY	20	1.21038	0.208942	0.432374
GO_SENSORY_PERCEPTION_OF_PAIN	28	1.20935	0.205323	0.434081
GO_CELLULAR_CARBOHYDRATE_BIOSYNTHETIC_PROCESS	39	1.20887	0.186994	0.434565
GO_REGULATION_OF_NEURON_PROJECTION_DEVELOPMENT	270	1.20887	0.0584677	0.433984
GO_REGULATION_OF_ALPHA_BETA_T_CELL_ACTIVATION	54	1.20658	0.172495	0.438455
GO_REGULATION_OF_AXONOGENESIS	113	1.20604	0.118736	0.439058
REACTOME_SIGNAL_AMPLIFICATION	20	1.20585	0.216088	0.438891
GO_AMINE_CATABOLIC_PROCESS	16	1.2055	0.229358	0.439087
GO_HEPARAN_SULFATE_PROTEOGLYCAN_METABOLIC_PROCESS	17	1.20546	0.22064	0.438576
GO_HISTONE_H3_ACETYLATION	41	1.20412	0.180979	0.440951
REACTOME_KERATAN_SULFATE_KERATIN_METABOLISM	17	1.20399	0.217744	0.440665
GO_REGULATION_OF_CALCIUM_ION_DEPENDENT_EXOCYTOSIS	37	1.20396	0.190706	0.440142
GO_NEGATIVE_REGULATION_OF_PRODUCTION_OF_MOLECULAR_MEDIATOR_OF_IMMUNE_RESPONSE	18	1.20279	0.225016	0.442153
REACTOME_SIGNALLING_TO_ERKS	30	1.20273	0.204876	0.441701
GO_POSITIVE_REGULATION_OF_CELL_PROLIFERATION	498	1.20271	0.0268707	0.441151
GO_REGULATION_OF_INNATE_IMMUNE_RESPONSE	299	1.20264	0.0625187	0.440695
GO_INNER_EAR_RECEPTOR_CELL_DEVELOPMENT	21	1.20236	0.21681	0.440737
REACTOME_LIPID_DIGESTION_MOBILIZATION_AND_TRANSPORT	26	1.20208	0.213306	0.440747
GO_NEURON_DIFFERENTIATION	493	1.20102	0.0324763	0.442513
GO_REGULATION_OF_CELLULAR_RESPONSE_TO_INSULIN_STIMULUS	44	1.20035	0.184247	0.443413
GO_TOR_SIGNALING	15	1.20002	0.22937	0.443571
GO_REGULATION_OF_CELL_PROJECTION_ASSEMBLY	115	1.19914	0.125064	0.444914
GO_NEGATIVE_REGULATION_OF_CELL_DEVELOPMENT	181	1.19882	0.100626	0.445053
GO_CELLULAR_CARBOHYDRATE_METABOLIC_PROCESS	110	1.19851	0.132481	0.445141
GO_NUCLEUS_LOCALIZATION	18	1.19823	0.226091	0.445182
GO_NUCLEOTIDE_SUGAR_BIOSYNTHETIC_PROCESS	17	1.19821	0.238836	0.444647
GO_NEGATIVE_REGULATION_OF_INNATE_IMMUNE_RESPONSE	33	1.19809	0.200366	0.444327
GO_RESPONSE_TO_CORTICOSTERONE	15	1.19614	0.244575	0.448142
GO_POSITIVE_REGULATION_OF_CELL_DIFFERENTIATION	500	1.19553	0.0361784	0.448915
GO_SCF_DEPENDENT_PROTEASOMAL_UBIQUITIN_DEPENDENT_PROTEIN_CATABOLIC_PROCESS	20	1.19542	0.221392	0.448602
GO_CELLULAR_RESPONSE_TO_ORGANIC_CYCLIC_COMPOUND	314	1.19532	0.0651106	0.448237
GO_REGULATION_OF_PROTEIN_TYROSINE_KINASE_ACTIVITY	42	1.19525	0.190586	0.447786
GO_NEGATIVE_REGULATION_OF_LEUKOCYTE_MEDIATED_IMMUNITY	36	1.19515	0.195891	0.447428
GO_TUBE_DEVELOPMENT	334	1.19466	0.0602521	0.447957
GO_POSITIVE_REGULATION_OF_PROTEIN_BINDING	62	1.19456	0.166707	0.447583
GO_GLOMERULUS_DEVELOPMENT	23	1.19426	0.220615	0.447672
GO_NEGATIVE_REGULATION_OF_CYTOKINE_SECRETION	25	1.19417	0.223226	0.447297
GO_NECROPTOTIC_PROCESS	21	1.19273	0.225997	0.44996
GO_SERINE_FAMILY_AMINO_ACID_METABOLIC_PROCESS	30	1.1927	0.208573	0.449434
GO_PTERIDINE_CONTAINING_COMPOUND_METABOLIC_PROCESS	31	1.19228	0.207114	0.449799
GO_RESPONSE_TO_COLD	31	1.19176	0.210275	0.450416
GO_REGULATION_OF_CELL_SHAPE	108	1.19153	0.142642	0.450345
GO_CELLULAR_EXTRAVASATION	20	1.18942	0.224053	0.454544
GO_NEURAL_PRECURSOR_CELL_PROLIFERATION	40	1.189	0.204435	0.454907
GO_RESPONSE_TO_LIPOPROTEIN_PARTICLE	18	1.18896	0.236029	0.454397
GO_NATURAL_KILLER_CELL_ACTIVATION	28	1.18884	0.217205	0.454072
GO_NEGATIVE_REGULATION_OF_CELL_PROLIFERATION	440	1.18821	0.0533934	0.454905
GO_REGULATION_OF_EXTENT_OF_CELL_GROWTH	70	1.18816	0.168396	0.454439
GO_T_CELL_DIFFERENTIATION_INVOLVED_IN_IMMUNE_RESPONSE	21	1.1876	0.238405	0.455129
GO_POSITIVE_REGULATION_OF_TRANSCRIPTION_FROM_RNA_POLYMERASE_II_PROMOTER_IN_RESPONSE_TO_STRESS	21	1.18745	0.23002	0.454893
GO_PEPTIDE_SECRETION	34	1.18715	0.2099	0.45498
GO_ANGIOGENESIS	194	1.18704	0.105396	0.454642
GO_SECRETION_BY_CELL	301	1.18627	0.0775523	0.455848
GO_GTP_METABOLIC_PROCESS	17	1.18594	0.24056	0.456021
GO_NEGATIVE_REGULATION_OF_VASCULATURE_DEVELOPMENT	45	1.18535	0.195512	0.456774
GO_POSITIVE_REGULATION_OF_FIBROBLAST_PROLIFERATION	34	1.18523	0.204147	0.456438
GO_RESPONSE_TO_ALKALOID	78	1.18406	0.168911	0.458543
REACTOME_PEPTIDE_LIGAND_BINDING_RECEPTORS	68	1.18405	0.174312	0.457985
GO_POSITIVE_REGULATION_OF_CYTOKINE_BIOSYNTHETIC_PROCESS	44	1.18385	0.203394	0.457872
GO_POSITIVE_REGULATION_OF_SMALL_GTPASE_MEDIATED_SIGNAL_TRANSDUCTION	22	1.18373	0.224503	0.457558
GO_METANEPHROS_DEVELOPMENT	36	1.18363	0.211142	0.457217
GO_REGULATION_OF_OSTEOBLAST_DIFFERENTIATION	70	1.18246	0.174774	0.459288
GO_REGULATION_OF_OXIDOREDUCTASE_ACTIVITY	63	1.18207	0.183832	0.459604
REACTOME_METABOLISM_OF_AMINO_ACIDS_AND_DERIVATIVES	143	1.18194	0.122908	0.459317
GO_REGULATION_OF_MACROPHAGE_DERIVED_FOAM_CELL_DIFFERENTIATION	17	1.18156	0.25011	0.459583
GO_REGULATION_OF_FATTY_ACID_METABOLIC_PROCESS	55	1.18156	0.188591	0.45901
GO_TRANSITION_METAL_ION_HOMEOSTASIS	82	1.18151	0.164557	0.458547
GO_LIPID_OXIDATION	58	1.18127	0.198107	0.458506
GO_PROTEIN_TETRAMERIZATION	101	1.18059	0.150546	0.459492
GO_PROTEOGLYCAN_BIOSYNTHETIC_PROCESS	34	1.17874	0.214417	0.463137
GO_WNT_SIGNALING_PATHWAY_CALCIUM_MODULATING_PATHWAY	27	1.17852	0.231065	0.463088
GO_AROMATIC_AMINO_ACID_FAMILY_METABOLIC_PROCESS	18	1.17783	0.249666	0.464099
GO_REGULATION_OF_CYTOSKELETON_ORGANIZATION	377	1.17759	0.0672078	0.464066
GO_ACTIN_CYTOSKELETON_REORGANIZATION	41	1.17752	0.208032	0.463663
GO_EPHRIN_RECEPTOR_SIGNALING_PATHWAY	65	1.17697	0.193037	0.464359
GO_PEPTIDE_TRANSPORT	44	1.17559	0.215086	0.466935
GO_NEUROTRANSMITTER_METABOLIC_PROCESS	15	1.17531	0.259259	0.467013
GO_THIOESTER_BIOSYNTHETIC_PROCESS	41	1.17505	0.213556	0.467034
GO_REGULATION_OF_LYMPHOCYTE_APOPTOTIC_PROCESS	43	1.17487	0.205582	0.466877
GO_PHOSPHOLIPID_CATABOLIC_PROCESS	20	1.17475	0.246716	0.466599
GO_DETECTION_OF_BIOTIC_STIMULUS	18	1.1739	0.255563	0.467999
GO_DEOXYRIBOSE_PHOSPHATE_CATABOLIC_PROCESS	21	1.17387	0.245329	0.46748
REACTOME_PI_METABOLISM	43	1.17373	0.215468	0.467227
GO_CILIUM_MOVEMENT	19	1.17357	0.247564	0.467031
GO_POSITIVE_REGULATION_OF_MAP_KINASE_ACTIVITY	145	1.17243	0.137646	0.469062
GO_DEVELOPMENTAL_CELL_GROWTH	49	1.17234	0.212751	0.468713
GO_NEGATIVE_REGULATION_OF_INTRACELLULAR_SIGNAL_TRANSDUCTION	332	1.17171	0.0792534	0.469597
REACTOME_GROWTH_HORMONE_RECEPTOR_SIGNALING	19	1.17115	0.252625	0.47031
GO_PHOSPHATIDYLINOSITOL_METABOLIC_PROCESS	133	1.17063	0.145512	0.470958
GO_REGULATION_OF_STEROID_METABOLIC_PROCESS	43	1.16988	0.21875	0.472142
GO_RESPONSE_TO_NICOTINE	22	1.16966	0.250688	0.472083
GO_REGULATION_OF_INTERLEUKIN_2_PRODUCTION	38	1.16961	0.222451	0.471631
GO_ACTIN_FILAMENT_BUNDLE_ORGANIZATION	39	1.16912	0.221612	0.47219
GO_REGULATION_OF_TRANSPORTER_ACTIVITY	122	1.16812	0.163758	0.473911
GO_REGULATION_OF_BODY_FLUID_LEVELS	300	1.16809	0.09181	0.473395
GO_EXOCRINE_SYSTEM_DEVELOPMENT	26	1.16772	0.248822	0.473692
GO_NEGATIVE_REGULATION_OF_POTASSIUM_ION_TRANSPORT	17	1.16754	0.258572	0.473527
GO_THYROID_GLAND_DEVELOPMENT	15	1.16728	0.265055	0.473566
GO_EPITHELIAL_CELL_DEVELOPMENT	119	1.16591	0.152425	0.476208
GO_ANDROGEN_METABOLIC_PROCESS	17	1.16588	0.257569	0.475709
GO_WATER_HOMEOSTASIS	27	1.16565	0.239411	0.475672
GO_NEGATIVE_REGULATION_OF_ERK1_AND_ERK2_CASCADE	39	1.16529	0.222272	0.47593
GO_REGULATION_OF_INTERLEUKIN_8_PRODUCTION	48	1.16525	0.214185	0.475444
REACTOME_MUSCLE_CONTRACTION	27	1.1652	0.242627	0.474986
GO_MICROTUBULE_POLYMERIZATION_OR_DEPOLYMERIZATION	33	1.16428	0.234585	0.476543
GO_NEGATIVE_REGULATION_OF_NERVOUS_SYSTEM_DEVELOPMENT	160	1.16421	0.139278	0.476136
GO_REGULATION_OF_MUSCLE_CONTRACTION	76	1.16406	0.183463	0.475902
GO_POSITIVE_REGULATION_OF_SECRETION	235	1.16369	0.113507	0.476187
GO_CELLULAR_RESPONSE_TO_BIOTIC_STIMULUS	131	1.16319	0.161446	0.476793
GO_REGULATION_OF_ENDOTHELIAL_CELL_MIGRATION	72	1.16302	0.193037	0.476602
GO_INORGANIC_ANION_TRANSPORT	59	1.16271	0.21011	0.476752
GO_CELL_COMMUNICATION_INVOLVED_IN_CARDIAC_CONDUCTION	15	1.16259	0.266797	0.476468
GO_MEIOTIC_CHROMOSOME_SEGREGATION	41	1.16218	0.228062	0.476834
GO_RESPONSE_TO_METAL_ION	222	1.16212	0.119128	0.476415
GO_POSITIVE_REGULATION_OF_LIPASE_ACTIVITY	36	1.16147	0.231838	0.477326
GO_SULFUR_AMINO_ACID_BIOSYNTHETIC_PROCESS	15	1.15975	0.2766	0.480729
GO_CELL_ACTIVATION_INVOLVED_IN_IMMUNE_RESPONSE	91	1.15897	0.182019	0.482013
GO_ADENYLATE_CYCLASE_INHIBITING_G_PROTEIN_COUPLED_RECEPTOR_SIGNALING_PATHWAY	21	1.15832	0.260696	0.482946
GO_SCHWANN_CELL_DEVELOPMENT	17	1.15829	0.266901	0.482465
GO_POSITIVE_REGULATION_OF_CELL_PROJECTION_ORGANIZATION	210	1.15823	0.131143	0.482028
GO_REGULATION_OF_CELLULAR_KETONE_METABOLIC_PROCESS	123	1.15806	0.162541	0.481874
GO_POSITIVE_REGULATION_OF_CARTILAGE_DEVELOPMENT	15	1.15795	0.276619	0.481569
GO_REGULATION_OF_TOLL_LIKE_RECEPTOR_SIGNALING_PATHWAY	43	1.15708	0.234689	0.482999
GO_POSITIVE_REGULATION_OF_MICROTUBULE_POLYMERIZATION_OR_DEPOLYMERIZATION	19	1.15685	0.262588	0.48296
REACTOME_INHIBITION_OF_VOLTAGE_GATED_CA2_CHANNELS_VIA_GBETA_GAMMA_SUBUNITS	16	1.15562	0.269974	0.485301
GO_BEHAVIOR	258	1.15296	0.123386	0.491015
GO_REGULATION_OF_NATURAL_KILLER_CELL_ACTIVATION	20	1.15199	0.267289	0.492761
GO_POSITIVE_REGULATION_OF_INTERLEUKIN_6_PRODUCTION	51	1.15146	0.227112	0.493431
REACTOME_APOPTOTIC_CLEAVAGE_OF_CELLULAR_PROTEINS	27	1.15073	0.266053	0.494591
GO_DEVELOPMENTAL_MATURATION	121	1.15029	0.175448	0.495055
GO_BLOOD_VESSEL_MORPHOGENESIS	234	1.14961	0.13183	0.496116
GO_PALLIUM_DEVELOPMENT	86	1.14926	0.199703	0.496363
GO_POSITIVE_REGULATION_OF_LYMPHOCYTE_MEDIATED_IMMUNITY	52	1.14914	0.228737	0.496106
GO_ESTABLISHMENT_OR_MAINTENANCE_OF_CELL_POLARITY	100	1.14864	0.194382	0.496725
GO_CIRCADIAN_REGULATION_OF_GENE_EXPRESSION	45	1.14819	0.238309	0.497218
GO_ION_TRANSMEMBRANE_TRANSPORT	457	1.148	0.082345	0.497114
GO_REGULATION_OF_WOUND_HEALING	79	1.1479	0.211681	0.496764
REACTOME_ACTIVATION_OF_KAINATE_RECEPTORS_UPON_GLUTAMATE_BINDING	18	1.14736	0.276844	0.497474
GO_INORGANIC_ION_TRANSMEMBRANE_TRANSPORT	317	1.14721	0.113421	0.497257
GO_CARDIAC_CELL_DEVELOPMENT	19	1.14659	0.276327	0.498158
GO_TELOMERE_MAINTENANCE_VIA_RECOMBINATION	29	1.14647	0.262537	0.497891
GO_POSITIVE_REGULATION_OF_CELLULAR_COMPONENT_BIOGENESIS	280	1.14636	0.117162	0.497569
GO_REGULATION_OF_STEROID_BIOSYNTHETIC_PROCESS	30	1.14442	0.260548	0.501652
REACTOME_ACTIVATED_TAK1_MEDIATES_P38_MAPK_ACTIVATION	16	1.14437	0.281362	0.501197
GO_STEROID_BIOSYNTHETIC_PROCESS	68	1.14255	0.223583	0.504992
GO_GLOBAL_GENOME_NUCLEOTIDE_EXCISION_REPAIR	31	1.14053	0.264926	0.50935
GO_REGULATION_OF_FIBROBLAST_PROLIFERATION	58	1.14041	0.238453	0.509065
GO_TUBE_MORPHOGENESIS	198	1.1402	0.158922	0.508987
GO_NEGATIVE_REGULATION_OF_INTRACELLULAR_STEROID_HORMONE_RECEPTOR_SIGNALING_PATHWAY	23	1.13918	0.272504	0.510879
GO_REGULATION_OF_SYMBIOSIS_ENCOMPASSING_MUTUALISM_THROUGH_PARASITISM	169	1.13812	0.165573	0.512866
GO_CELL_PROLIFERATION	437	1.13806	0.0939751	0.512443
GO_HEPARAN_SULFATE_PROTEOGLYCAN_BIOSYNTHETIC_PROCESS	15	1.13743	0.29132	0.513396
GO_ALCOHOL_METABOLIC_PROCESS	239	1.1373	0.143883	0.513112
GO_EPIDERMAL_CELL_DIFFERENTIATION	64	1.13708	0.228738	0.513064
GO_ALCOHOL_BIOSYNTHETIC_PROCESS	80	1.13652	0.222471	0.513858
GO_CELLULAR_RESPONSE_TO_HYDROGEN_PEROXIDE	50	1.1362	0.255808	0.514074
GO_IRON_ION_HOMEOSTASIS	50	1.13588	0.249412	0.514275
GO_SYNAPTIC_VESICLE_CYCLE	42	1.13568	0.254478	0.514177
GO_REGULATION_OF_I_KAPPAB_KINASE_NF_KAPPAB_SIGNALING	196	1.13565	0.16049	0.513672
GO_CELLULAR_AMINO_ACID_METABOLIC_PROCESS	260	1.13529	0.139025	0.513964
GO_POSITIVE_REGULATION_OF_NUCLEOTIDE_METABOLIC_PROCESS	65	1.1352	0.233461	0.513611
GO_POSITIVE_REGULATION_OF_CELL_MATRIX_ADHESION	29	1.13476	0.275356	0.514088
GO_REGULATION_OF_REGULATED_SECRETORY_PATHWAY	75	1.13452	0.223819	0.514132
GO_REGULATION_OF_ACTIN_FILAMENT_BUNDLE_ASSEMBLY	50	1.13184	0.250573	0.520069
GO_CARBOHYDRATE_METABOLIC_PROCESS	460	1.13141	0.106116	0.520546
GO_RHYTHMIC_PROCESS	188	1.13138	0.174924	0.520024
GO_NEGATIVE_REGULATION_OF_OSTEOBLAST_DIFFERENTIATION	23	1.13126	0.284038	0.519744
GO_RESPONSE_TO_OXIDATIVE_STRESS	271	1.12945	0.137087	0.523627
GO_REGULATION_OF_CELL_DIVISION	181	1.12882	0.167937	0.524571
GO_CYTOKINE_PRODUCTION	83	1.12855	0.228537	0.524661
GO_NEGATIVE_REGULATION_OF_LEUKOCYTE_DIFFERENTIATION	54	1.12757	0.256593	0.526517
GO_REGULATION_OF_ISOTYPE_SWITCHING	17	1.12644	0.301509	0.528722
GO_NEGATIVE_REGULATION_OF_OXIDOREDUCTASE_ACTIVITY	17	1.12608	0.305208	0.529039
GO_PROTEIN_KINASE_B_SIGNALING	28	1.12591	0.284404	0.528882
GO_NEURAL_CREST_CELL_MIGRATION	22	1.1255	0.292399	0.529307
GO_OLFACTORY_LOBE_DEVELOPMENT	22	1.12381	0.295982	0.532936
GO_POSITIVE_REGULATION_OF_INTERLEUKIN_8_PRODUCTION	37	1.12379	0.275143	0.532383
GO_CALCIUM_ION_REGULATED_EXOCYTOSIS	37	1.12297	0.272893	0.533858
GO_ACUTE_PHASE_RESPONSE	21	1.12217	0.293466	0.535295
GO_NEGATIVE_REGULATION_OF_ENDOTHELIAL_CELL_MIGRATION	24	1.12148	0.288632	0.536482
GO_POLYSACCHARIDE_BIOSYNTHETIC_PROCESS	32	1.12143	0.287448	0.536002
GO_NEGATIVE_REGULATION_OF_AXON_GUIDANCE	15	1.12116	0.308741	0.53609
REACTOME_ENOS_ACTIVATION_AND_REGULATION	16	1.12057	0.30588	0.536966
GO_REGULATION_OF_DEVELOPMENTAL_GROWTH	176	1.12037	0.194812	0.536865
GO_CELLULAR_RESPONSE_TO_OXIDATIVE_STRESS	145	1.11948	0.212739	0.538522
GO_STRAND_DISPLACEMENT	21	1.11931	0.303051	0.538356
GO_MEMBRANE_LIPID_CATABOLIC_PROCESS	19	1.1184	0.304482	0.540087
GO_REGULATION_OF_CALCIUM_ION_TRANSMEMBRANE_TRANSPORTER_ACTIVITY	42	1.11836	0.275607	0.539579
GO_IMMUNOGLOBULIN_PRODUCTION_INVOLVED_IN_IMMUNOGLOBULIN_MEDIATED_IMMUNE_RESPONSE	17	1.11727	0.318233	0.541736
GO_NEGATIVE_REGULATION_OF_CHEMOKINE_PRODUCTION	15	1.11723	0.31362	0.541238
GO_REGULATION_OF_MULTI_ORGANISM_PROCESS	349	1.11701	0.146326	0.541219
REACTOME_GLYCOSPHINGOLIPID_METABOLISM	27	1.11596	0.296556	0.543269
GO_CARBOHYDRATE_CATABOLIC_PROCESS	84	1.11549	0.248387	0.543862
GO_ENSHEATHMENT_OF_NEURONS	55	1.11543	0.267639	0.543429
GO_SMALL_MOLECULE_BIOSYNTHETIC_PROCESS	316	1.11383	0.153661	0.546925
REACTOME_SULFUR_AMINO_ACID_METABOLISM	20	1.11375	0.309831	0.546534
GO_SPERM_MOTILITY	24	1.11345	0.30752	0.546698
GO_THIOESTER_METABOLIC_PROCESS	63	1.11319	0.265095	0.546778
GO_REGULATION_OF_CELL_MATRIX_ADHESION	64	1.11274	0.260362	0.547323
GO_RESPIRATORY_SYSTEM_DEVELOPMENT	120	1.11274	0.234774	0.546736
GO_SYNAPTIC_VESICLE_LOCALIZATION	56	1.1121	0.272313	0.547796
GO_DEFENSE_RESPONSE_TO_GRAM_NEGATIVE_BACTERIUM	22	1.11194	0.31076	0.547596
GO_CELLULAR_RESPONSE_TO_CALCIUM_ION	32	1.11045	0.293561	0.55081
GO_SPECIFICATION_OF_SYMMETRY	66	1.11002	0.272248	0.551295
GO_NEURAL_CREST_CELL_DIFFERENTIATION	35	1.10968	0.295402	0.551559
GO_LAMELLIPODIUM_ORGANIZATION	31	1.10915	0.302844	0.552311
GO_REGULATION_OF_SUBSTRATE_ADHESION_DEPENDENT_CELL_SPREADING	31	1.10887	0.301229	0.552461
GO_REGULATION_OF_VIRAL_TRANSCRIPTION	51	1.10852	0.270521	0.552749
GO_SYNAPSIS	20	1.10838	0.31732	0.552534
GO_REGULATION_OF_GLUCOSE_IMPORT	44	1.10837	0.290488	0.551964
GO_B_CELL_ACTIVATION_INVOLVED_IN_IMMUNE_RESPONSE	27	1.10727	0.304471	0.554183
GO_REGULATION_OF_PLASMA_LIPOPROTEIN_PARTICLE_LEVELS	28	1.10702	0.296553	0.554233
GO_POTASSIUM_ION_TRANSPORT	70	1.10697	0.269837	0.55378
GO_NEGATIVE_REGULATION_OF_GROWTH	157	1.10635	0.223829	0.55482
GO_MYELOID_DENDRITIC_CELL_ACTIVATION	18	1.1054	0.322924	0.556659
GO_REGULATION_OF_CATION_TRANSMEMBRANE_TRANSPORT	126	1.10531	0.235492	0.556295
GO_POSITIVE_REGULATION_OF_VASCULATURE_DEVELOPMENT	79	1.10405	0.266139	0.558896
GO_POSITIVE_REGULATION_OF_CELL_DEATH	481	1.10405	0.131397	0.558313
GO_REGULATION_OF_RESPONSE_TO_OXIDATIVE_STRESS	49	1.10396	0.283006	0.557959
GO_TRNA_METHYLATION	21	1.10394	0.323183	0.557438
GO_POSITIVE_REGULATION_OF_INNATE_IMMUNE_RESPONSE	215	1.10351	0.199667	0.557975
GO_TOXIN_TRANSPORT	32	1.1033	0.304417	0.557924
GO_POSITIVE_REGULATION_OF_LAMELLIPODIUM_ORGANIZATION	19	1.1032	0.322502	0.557584
GO_NEGATIVE_REGULATION_OF_STEM_CELL_DIFFERENTIATION	23	1.10293	0.308393	0.557691
GO_POSITIVE_REGULATION_OF_ALPHA_BETA_T_CELL_DIFFERENTIATION	28	1.10275	0.311228	0.557572
REACTOME_REGULATION_OF_HYPOXIA_INDUCIBLE_FACTOR_HIF_BY_OXYGEN	20	1.10252	0.326115	0.557594
GO_POSITIVE_REGULATION_OF_I_KAPPAB_KINASE_NF_KAPPAB_SIGNALING	150	1.10233	0.226815	0.557489
GO_GLYCERALDEHYDE_3_PHOSPHATE_METABOLIC_PROCESS	16	1.10153	0.330208	0.558946
GO_POSITIVE_REGULATION_OF_PROTEIN_LOCALIZATION_TO_NUCLEUS	95	1.10139	0.267021	0.558741
GO_REGULATION_OF_LIPASE_ACTIVITY	46	1.10135	0.29375	0.558242
GO_POSITIVE_REGULATION_OF_STRESS_ACTIVATED_PROTEIN_KINASE_SIGNALING_CASCADE	102	1.1009	0.265522	0.55884
GO_CHROMOSOME_CONDENSATION	19	1.10063	0.322167	0.558927
GO_GLYCOSYL_COMPOUND_CATABOLIC_PROCESS	33	1.10058	0.306782	0.558504
REACTOME_MEIOSIS	71	1.10026	0.273373	0.558728
REACTOME_GPVI_MEDIATED_ACTIVATION_CASCADE	30	1.10019	0.306878	0.558338
GO_DEVELOPMENTAL_GROWTH_INVOLVED_IN_MORPHOGENESIS	62	1.09876	0.278387	0.561437
GO_PHOSPHATIDYLGLYCEROL_METABOLIC_PROCESS	19	1.09726	0.332162	0.564697
GO_REGULATION_OF_DENDRITE_MORPHOGENESIS	50	1.09724	0.29374	0.564158
GO_NEGATIVE_REGULATION_OF_INTRINSIC_APOPTOTIC_SIGNALING_PATHWAY	74	1.09706	0.27707	0.564055
GO_VASCULAR_PROCESS_IN_CIRCULATORY_SYSTEM	80	1.09691	0.277885	0.56386
GO_DIGESTIVE_TRACT_MORPHOGENESIS	21	1.0966	0.324499	0.56408
GO_LYMPHOCYTE_ACTIVATION_INVOLVED_IN_IMMUNE_RESPONSE	64	1.09633	0.279663	0.564176
GO_POSITIVE_REGULATION_OF_MUSCLE_CONTRACTION	23	1.0962	0.326503	0.563931
GO_REGULATION_OF_PEPTIDASE_ACTIVITY	252	1.09602	0.20766	0.563793
GO_MYELOID_LEUKOCYTE_DIFFERENTIATION	73	1.09589	0.278286	0.563543
GO_POSITIVE_REGULATION_OF_COAGULATION	17	1.0956	0.336907	0.563703
GO_NEURAL_RETINA_DEVELOPMENT	20	1.09538	0.33386	0.563692
GO_POSITIVE_REGULATION_OF_PHOSPHOLIPASE_ACTIVITY	29	1.09522	0.320297	0.56352
GO_REGULATION_OF_BLOOD_PRESSURE	77	1.09466	0.279791	0.564374
GO_REGULATION_OF_HORMONE_METABOLIC_PROCESS	15	1.09444	0.334452	0.564397
GO_CYTOSKELETON_DEPENDENT_CYTOKINESIS	34	1.09305	0.316697	0.567405
GO_REGULATION_OF_CYSTEINE_TYPE_ENDOPEPTIDASE_ACTIVITY_INVOLVED_IN_APOPTOTIC_SIGNALING_PATHWAY	22	1.09268	0.332813	0.567763
GO_TERPENOID_METABOLIC_PROCESS	52	1.0922	0.294386	0.568438
GO_REGULATION_OF_BMP_SIGNALING_PATHWAY	46	1.0915	0.307131	0.569648
GO_CIRCADIAN_RHYTHM	91	1.09136	0.278409	0.569439
GO_REGULATION_OF_PHOSPHOLIPASE_ACTIVITY	36	1.09082	0.319861	0.570241
GO_RESPONSE_TO_AMINO_ACID	72	1.09056	0.292671	0.570358
REACTOME_PLATELET_ACTIVATION_SIGNALING_AND_AGGREGATION	142	1.09035	0.257308	0.570318
GO_REGULATION_OF_DENDRITE_DEVELOPMENT	80	1.08997	0.288312	0.570694
GO_CARBOHYDRATE_HOMEOSTASIS	109	1.08935	0.271852	0.571722
GO_FOREBRAIN_NEURON_DEVELOPMENT	19	1.08916	0.334143	0.571644
GO_POSITIVE_REGULATION_OF_ESTABLISHMENT_OF_PROTEIN_LOCALIZATION	369	1.08889	0.191233	0.571786
GO_ADENYLATE_CYCLASE_MODULATING_G_PROTEIN_COUPLED_RECEPTOR_SIGNALING_PATHWAY	47	1.08853	0.307549	0.572158
GO_PROTEIN_IMPORT_INTO_NUCLEUS_TRANSLOCATION	21	1.08847	0.332875	0.571731
GO_MATERNAL_PLACENTA_DEVELOPMENT	22	1.08802	0.329335	0.572323
GO_PEPTIDYL_SERINE_MODIFICATION	124	1.08734	0.267095	0.573529
GO_REGULATION_OF_FATTY_ACID_BIOSYNTHETIC_PROCESS	22	1.08704	0.33208	0.573741
GO_REGULATION_OF_MYOTUBE_DIFFERENTIATION	36	1.08686	0.320973	0.573643
GO_MODULATION_OF_TRANSCRIPTION_IN_OTHER_ORGANISM_INVOLVED_IN_SYMBIOTIC_INTERACTION	19	1.08666	0.34103	0.573584
GO_POSITIVE_REGULATION_OF_HOMEOSTATIC_PROCESS	139	1.08663	0.253121	0.573091
GO_REGULATION_OF_NITRIC_OXIDE_SYNTHASE_ACTIVITY	35	1.08619	0.320914	0.573664
GO_REGULATION_OF_PHOSPHOPROTEIN_PHOSPHATASE_ACTIVITY	48	1.08568	0.317251	0.574406
GO_MEMBRANE_RAFT_ORGANIZATION	15	1.08559	0.352802	0.57408
REACTOME_CHOLESTEROL_BIOSYNTHESIS	19	1.08516	0.347673	0.574613
GO_MYELOID_CELL_DEVELOPMENT	32	1.08513	0.325438	0.57412
GO_POSITIVE_REGULATION_OF_CELL_MORPHOGENESIS_INVOLVED_IN_DIFFERENTIATION	115	1.085	0.27641	0.573867
GO_SENSORY_PERCEPTION_OF_LIGHT_STIMULUS	88	1.08432	0.304682	0.575063
GO_DENDRITE_DEVELOPMENT	54	1.08428	0.309819	0.574611
GO_HORMONE_BIOSYNTHETIC_PROCESS	26	1.08311	0.336163	0.577086
GO_POSITIVE_REGULATION_OF_ION_TRANSPORT	134	1.08284	0.273704	0.577213
GO_REGULATION_OF_NEUROTRANSMITTER_LEVELS	100	1.08249	0.287875	0.577587
GO_BONE_REMODELING	26	1.08242	0.333632	0.577202
GO_HEMOSTASIS	199	1.08217	0.250278	0.577268
GO_POST_TRANSLATIONAL_PROTEIN_MODIFICATION	27	1.08157	0.342742	0.578245
GO_T_CELL_RECEPTOR_SIGNALING_PATHWAY	123	1.08151	0.280563	0.577845
GO_NEGATIVE_REGULATION_OF_HEMOPOIESIS	85	1.08114	0.292581	0.578228
GO_POSITIVE_REGULATION_OF_INTERLEUKIN_2_PRODUCTION	26	1.08097	0.333333	0.578124
GO_POSITIVE_REGULATION_OF_TRANSMEMBRANE_TRANSPORT	77	1.08068	0.308971	0.578276
GO_MULTI_MULTICELLULAR_ORGANISM_PROCESS	127	1.08065	0.283416	0.577797
GO_REGULATION_OF_ORGAN_MORPHOGENESIS	162	1.08044	0.266863	0.577777
GO_SPROUTING_ANGIOGENESIS	23	1.07967	0.341342	0.579205
GO_FC_GAMMA_RECEPTOR_SIGNALING_PATHWAY	69	1.07924	0.309082	0.579757
GO_ACUTE_INFLAMMATORY_RESPONSE	40	1.0782	0.328129	0.581878
GO_PLATELET_DEGRANULATION	68	1.07803	0.314177	0.581766
GO_CEREBRAL_CORTEX_DEVELOPMENT	63	1.07718	0.314137	0.583441
GO_CELL_CELL_RECOGNITION	34	1.07635	0.344749	0.585027
GO_DNA_MODIFICATION	60	1.07623	0.313487	0.58478
GO_SECRETION	353	1.07566	0.231322	0.585691
GO_REGULATION_OF_RECEPTOR_MEDIATED_ENDOCYTOSIS	54	1.07566	0.321521	0.585143
GO_CELLULAR_RESPONSE_TO_REACTIVE_OXYGEN_SPECIES	79	1.07552	0.315572	0.584926
GO_CELL_MATURATION	80	1.07547	0.315487	0.584477
GO_COFACTOR_METABOLIC_PROCESS	270	1.07463	0.245433	0.586085
GO_AMINO_ACID_TRANSPORT	79	1.07404	0.306873	0.587069
GO_ORGANIC_ACID_TRANSMEMBRANE_TRANSPORT	66	1.07369	0.319308	0.587407
GO_CELLULAR_RESPONSE_TO_RETINOIC_ACID	34	1.07353	0.346648	0.587255
GO_REGULATION_OF_B_CELL_MEDIATED_IMMUNITY	28	1.07297	0.358495	0.588156
GO_REGULATION_OF_JNK_CASCADE	125	1.07292	0.294599	0.587714
GO_REGULATION_OF_CALCIUM_ION_TRANSMEMBRANE_TRANSPORT	69	1.07247	0.321516	0.588301
REACTOME_CLASS_B_2_SECRETIN_FAMILY_RECEPTORS	38	1.07233	0.341659	0.588103
GO_REGULATION_OF_LYASE_ACTIVITY	39	1.07215	0.336002	0.588022
GO_EAR_DEVELOPMENT	96	1.07199	0.317012	0.587864
GO_DENDRITIC_CELL_MIGRATION	16	1.0717	0.3614	0.588075
GO_PYRIMIDINE_CONTAINING_COMPOUND_METABOLIC_PROCESS	61	1.07163	0.326204	0.587674
GO_REGULATION_OF_MULTICELLULAR_ORGANISMAL_METABOLIC_PROCESS	25	1.07097	0.359523	0.588848
GO_PROTEIN_DEPOLYMERIZATION	19	1.07074	0.358303	0.588878
GO_ADULT_BEHAVIOR	69	1.06994	0.32881	0.590397
GO_POSITIVE_REGULATION_OF_ADENYLATE_CYCLASE_ACTIVITY	23	1.06934	0.353581	0.591383
GO_RESPONSE_TO_EXTRACELLULAR_STIMULUS	299	1.06886	0.251727	0.592097
GO_DIENCEPHALON_DEVELOPMENT	27	1.06875	0.357815	0.591824
GO_SENSORY_PERCEPTION_OF_CHEMICAL_STIMULUS	28	1.06862	0.360563	0.591593
GO_POSITIVE_REGULATION_OF_ENDOTHELIAL_CELL_MIGRATION	43	1.06858	0.340156	0.591139
GO_G_PROTEIN_COUPLED_RECEPTOR_SIGNALING_PATHWAY_COUPLED_TO_CYCLIC_NUCLEOTIDE_SECOND_MESSENGER	55	1.06712	0.338775	0.594454
GO_THYMIC_T_CELL_SELECTION	15	1.067	0.371095	0.594204
GO_CENTRAL_NERVOUS_SYSTEM_NEURON_DIFFERENTIATION	72	1.06664	0.335448	0.59457
GO_PYRUVATE_METABOLIC_PROCESS	44	1.06662	0.341424	0.594058
GO_REGULATION_OF_MYELOID_LEUKOCYTE_DIFFERENTIATION	74	1.06656	0.321265	0.593648
GO_POSITIVE_REGULATION_OF_SUBSTRATE_ADHESION_DEPENDENT_CELL_SPREADING	20	1.06643	0.363636	0.593421
GO_NEGATIVE_REGULATION_OF_OSTEOCLAST_DIFFERENTIATION	18	1.06642	0.366126	0.592896
GO_REGULATION_OF_MUSCLE_SYSTEM_PROCESS	108	1.06599	0.31444	0.593453
GO_NEGATIVE_REGULATION_OF_PROTEIN_KINASE_B_SIGNALING	28	1.06571	0.348454	0.593617
GO_SKIN_DEVELOPMENT	89	1.06558	0.327565	0.593398
GO_GLUTAMATE_RECEPTOR_SIGNALING_PATHWAY	15	1.0653	0.375111	0.593589
GO_MRNA_TRANSCRIPTION	17	1.0644	0.376277	0.595383
GO_CELLULAR_RESPONSE_TO_FLUID_SHEAR_STRESS	15	1.0643	0.372211	0.595069
GO_RESPONSE_TO_TOXIC_SUBSTANCE	163	1.06398	0.301575	0.595354
GO_CYTOKINESIS	72	1.06349	0.331312	0.59607
GO_CRANIAL_NERVE_DEVELOPMENT	18	1.06331	0.367519	0.595986
GO_REGULATED_EXOCYTOSIS	130	1.06285	0.31114	0.596621
GO_ERYTHROCYTE_HOMEOSTASIS	55	1.06148	0.346769	0.599661
GO_INTRACELLULAR_LIPID_TRANSPORT	16	1.0612	0.375166	0.599834
GO_MICROTUBULE_BASED_PROCESS	388	1.06114	0.254981	0.599421
GO_REGULATION_OF_DEFENSE_RESPONSE_TO_VIRUS	140	1.06089	0.314039	0.599553
GO_REGULATION_OF_DNA_BINDING	65	1.06054	0.336285	0.599908
GO_NEGATIVE_REGULATION_OF_G_PROTEIN_COUPLED_RECEPTOR_PROTEIN_SIGNALING_PATHWAY	28	1.06044	0.356898	0.599597
GO_REGULATION_OF_CARDIAC_MUSCLE_CONTRACTION	35	1.05974	0.358756	0.600876
GO_LIPID_HOMEOSTASIS	64	1.05972	0.343316	0.600367
GO_PROTEIN_LOCALIZATION_TO_CILIUM	21	1.05901	0.381122	0.601699
GO_RESPONSE_TO_GAMMA_RADIATION	41	1.059	0.35907	0.601159
GO_ENERGY_RESERVE_METABOLIC_PROCESS	51	1.05804	0.356972	0.603118
GO_REGULATION_OF_NERVOUS_SYSTEM_DEVELOPMENT	449	1.05761	0.256102	0.603678
GO_HEAD_DEVELOPMENT	422	1.05712	0.24537	0.604405
GO_REGULATION_OF_FILOPODIUM_ASSEMBLY	25	1.05699	0.365672	0.604196
GO_REGULATION_OF_THYMOCYTE_AGGREGATION	15	1.05663	0.38064	0.604599
GO_MODIFICATION_BY_SYMBIONT_OF_HOST_MORPHOLOGY_OR_PHYSIOLOGY	39	1.05615	0.360499	0.60534
GO_POSITIVE_REGULATION_OF_B_CELL_PROLIFERATION	27	1.05603	0.376134	0.605094
GO_SENSORY_ORGAN_DEVELOPMENT	261	1.05593	0.284198	0.604803
GO_REGULATION_OF_PHOSPHATASE_ACTIVITY	89	1.05584	0.33959	0.60449
REACTOME_SYNTHESIS_OF_PIPS_AT_THE_PLASMA_MEMBRANE	28	1.05554	0.366426	0.604732
GO_SINGLE_ORGANISM_BEHAVIOR	202	1.05533	0.308675	0.604722
GO_GASTRULATION	94	1.05509	0.342893	0.604822
GO_REGULATION_OF_SEQUENCE_SPECIFIC_DNA_BINDING_TRANSCRIPTION_FACTOR_ACTIVITY	276	1.05497	0.293098	0.604587
GO_MODIFICATION_OF_MORPHOLOGY_OR_PHYSIOLOGY_OF_OTHER_ORGANISM	77	1.05462	0.347447	0.604956
GO_CELL_RECOGNITION	69	1.05444	0.351267	0.604858
GO_T_CELL_HOMEOSTASIS	28	1.05325	0.378176	0.607461
GO_EPITHELIAL_CELL_PROLIFERATION	50	1.05263	0.366934	0.608578
GO_VASCULOGENESIS	34	1.05238	0.372531	0.608673
GO_NEGATIVE_REGULATION_OF_REACTIVE_OXYGEN_SPECIES_METABOLIC_PROCESS	28	1.05224	0.3823	0.608482
REACTOME_G_ALPHA_Z_SIGNALLING_EVENTS	26	1.0518	0.378129	0.609079
GO_POSITIVE_REGULATION_OF_NEURON_DIFFERENTIATION	187	1.05074	0.326075	0.611369
GO_CARDIAC_MUSCLE_TISSUE_DEVELOPMENT	72	1.05017	0.356013	0.612347
GO_REGULATION_OF_CELLULAR_RESPONSE_TO_GROWTH_FACTOR_STIMULUS	145	1.04992	0.330113	0.612443
GO_RESPONSE_TO_NUTRIENT	130	1.04905	0.341288	0.614179
REACTOME_SIGNALLING_BY_NGF	183	1.04849	0.327419	0.615104
GO_PHOSPHOLIPID_METABOLIC_PROCESS	267	1.04847	0.317271	0.614584
GO_PYRIMIDINE_NUCLEOSIDE_METABOLIC_PROCESS	38	1.04812	0.372652	0.614963
GO_POSITIVE_REGULATION_OF_CALCIUM_ION_TRANSPORT_INTO_CYTOSOL	25	1.04726	0.382123	0.616689
GO_NEGATIVE_REGULATION_OF_EPITHELIAL_CELL_PROLIFERATION	77	1.04655	0.366716	0.617995
GO_POSITIVE_REGULATION_OF_LEUKOCYTE_MEDIATED_IMMUNITY	65	1.04649	0.356079	0.617585
GO_REGULATION_OF_DNA_DEPENDENT_DNA_REPLICATION	35	1.04631	0.382538	0.617531
GO_GLYCEROLIPID_METABOLIC_PROCESS	247	1.04591	0.327954	0.618029
GO_STEM_CELL_DIFFERENTIATION	91	1.04508	0.356652	0.619658
GO_SCHWANN_CELL_DIFFERENTIATION	20	1.04508	0.392439	0.619119
REACTOME_INWARDLY_RECTIFYING_K_CHANNELS	19	1.04453	0.391218	0.620028
GO_MYELOID_CELL_HOMEOSTASIS	66	1.04444	0.36832	0.61973
GO_REGULATION_OF_CATECHOLAMINE_SECRETION	16	1.04423	0.39974	0.619719
GO_NEGATIVE_REGULATION_OF_ERBB_SIGNALING_PATHWAY	38	1.04399	0.381263	0.619783
GO_CELLULAR_RESPONSE_TO_ESTRADIOL_STIMULUS	16	1.04343	0.40433	0.620738
GO_PHOTORECEPTOR_CELL_MAINTENANCE	18	1.04328	0.39698	0.620578
GO_RENAL_TUBULE_DEVELOPMENT	34	1.04288	0.381761	0.621062
GO_MICROTUBULE_CYTOSKELETON_ORGANIZATION	266	1.0425	0.32769	0.621534
REACTOME_HS_GAG_DEGRADATION	15	1.04184	0.400261	0.622731
GO_REGULATION_OF_TRANSCRIPTION_FACTOR_IMPORT_INTO_NUCLEUS	79	1.04176	0.36764	0.622368
GO_HOMOTYPIC_CELL_CELL_ADHESION	35	1.04135	0.391324	0.622927
GO_REGULATION_OF_STEM_CELL_DIFFERENTIATION	67	1.04101	0.370289	0.623261
GO_REGULATION_OF_CYSTEINE_TYPE_ENDOPEPTIDASE_ACTIVITY	173	1.04094	0.346081	0.622892
GO_REGULATION_OF_TRANSCRIPTION_FROM_RNA_POLYMERASE_II_PROMOTER_IN_RESPONSE_TO_HYPOXIA	28	1.04042	0.393946	0.623718
GO_OOCYTE_DIFFERENTIATION	25	1.0403	0.396843	0.623483
GO_REGULATION_OF_PEPTIDE_TRANSPORT	155	1.0399	0.345765	0.623992
GO_ISOPRENOID_METABOLIC_PROCESS	68	1.03987	0.370318	0.623521
GO_POSITIVE_REGULATION_OF_OXIDOREDUCTASE_ACTIVITY	33	1.03946	0.392706	0.624043
GO_NEGATIVE_REGULATION_OF_CELL_CYCLE_G2_M_PHASE_TRANSITION	20	1.03935	0.402309	0.62379
GO_PHOSPHATIDYLINOSITOL_3_KINASE_SIGNALING	18	1.03926	0.397436	0.623474
GO_MEIOSIS_I	56	1.03771	0.383254	0.627006
GO_KIDNEY_EPITHELIUM_DEVELOPMENT	58	1.03754	0.390094	0.626909
GO_INTRINSIC_APOPTOTIC_SIGNALING_PATHWAY_IN_RESPONSE_TO_ENDOPLASMIC_RETICULUM_STRESS	30	1.03746	0.391206	0.626572
GO_ACTIVATION_OF_MAPK_ACTIVITY	98	1.03739	0.367753	0.626201
GO_ORGANIC_ACID_TRANSPORT	151	1.03635	0.36157	0.628403
GO_REGULATION_OF_STRIATED_MUSCLE_CELL_APOPTOTIC_PROCESS	15	1.03621	0.416138	0.628215
REACTOME_PYRIMIDINE_METABOLISM	19	1.03507	0.401316	0.630697
GO_POSITIVE_REGULATION_OF_OSSIFICATION	52	1.03487	0.394219	0.630662
GO_CARDIAC_MUSCLE_CELL_DIFFERENTIATION	35	1.03412	0.4016	0.632117
GO_PURINERGIC_RECEPTOR_SIGNALING_PATHWAY	15	1.03397	0.40367	0.631963
GO_REGULATION_OF_RAS_PROTEIN_SIGNAL_TRANSDUCTION	137	1.03249	0.380083	0.635397
GO_DNA_METHYLATION_OR_DEMETHYLATION	41	1.03239	0.397349	0.635119
GO_OUTFLOW_TRACT_MORPHOGENESIS	30	1.03141	0.402166	0.637211
GO_NEGATIVE_REGULATION_OF_ENDOPLASMIC_RETICULUM_STRESS_INDUCED_INTRINSIC_APOPTOTIC_SIGNALING_PATHWAY	16	1.03139	0.415206	0.636716
GO_CELL_CELL_SIGNALING	343	1.03084	0.348443	0.637629
GO_PROTEOGLYCAN_METABOLIC_PROCESS	47	1.03022	0.400046	0.638766
GO_SENSORY_PERCEPTION_OF_MECHANICAL_STIMULUS	74	1.02988	0.386479	0.639121
GO_TRANSMEMBRANE_RECEPTOR_PROTEIN_TYROSINE_KINASE_SIGNALING_PATHWAY	357	1.02955	0.350388	0.639452
GO_PROTEIN_LOCALIZATION_TO_LYSOSOME	16	1.02826	0.418913	0.64237
GO_PROTEIN_MATURATION	195	1.02781	0.373703	0.643036
GO_REGULATION_OF_RESPONSE_TO_BIOTIC_STIMULUS	176	1.02769	0.379482	0.642808
GO_REGULATION_OF_EPITHELIAL_CELL_MIGRATION	105	1.02763	0.389861	0.642406
REACTOME_SMOOTH_MUSCLE_CONTRACTION	17	1.02755	0.416957	0.642052
GO_RESPONSE_TO_TRANSFORMING_GROWTH_FACTOR_BETA	109	1.02664	0.387957	0.643945
GO_CELLULAR_CARBOHYDRATE_CATABOLIC_PROCESS	24	1.0263	0.416629	0.644302
GO_BONE_RESORPTION	17	1.02574	0.420277	0.645277
GO_POSITIVE_REGULATION_OF_DENDRITIC_SPINE_DEVELOPMENT	23	1.02563	0.421183	0.645021
GO_TOLL_LIKE_RECEPTOR_SIGNALING_PATHWAY	76	1.02555	0.402967	0.64467
GO_TRICARBOXYLIC_ACID_METABOLIC_PROCESS	31	1.02513	0.411468	0.645241
GO_VASCULAR_ENDOTHELIAL_GROWTH_FACTOR_RECEPTOR_SIGNALING_PATHWAY	66	1.02507	0.401277	0.644867
GO_NEPHRON_DEVELOPMENT	49	1.02462	0.411751	0.645475
GO_REGULATION_OF_TELOMERASE_ACTIVITY	34	1.02377	0.404113	0.647222
REACTOME_INTEGRATION_OF_ENERGY_METABOLISM	72	1.02371	0.404599	0.646849
GO_REGULATION_OF_LEUKOCYTE_DEGRANULATION	36	1.0217	0.420129	0.651715
GO_GLANDULAR_EPITHELIAL_CELL_DIFFERENTIATION	16	1.02117	0.419073	0.652597
GO_NEGATIVE_REGULATION_OF_DNA_REPLICATION	50	1.02099	0.414844	0.652507
GO_STEROL_HOMEOSTASIS	31	1.01923	0.426887	0.656737
GO_MUSCLE_ORGAN_MORPHOGENESIS	32	1.01908	0.423532	0.656562
GO_EXCITATORY_POSTSYNAPTIC_POTENTIAL	18	1.01693	0.428972	0.661843
REACTOME_AQUAPORIN_MEDIATED_TRANSPORT	27	1.0169	0.427079	0.66135
GO_ORGANIC_HYDROXY_COMPOUND_METABOLIC_PROCESS	309	1.01664	0.394729	0.661506
GO_REGULATION_OF_CILIUM_ASSEMBLY	44	1.01564	0.423113	0.663696
GO_NEGATIVE_REGULATION_OF_CELL_DIVISION	42	1.01518	0.428506	0.664366
GO_CELLULAR_AMINO_ACID_BIOSYNTHETIC_PROCESS	67	1.01492	0.426001	0.66451
GO_REGULATION_OF_DNA_REPLICATION	128	1.01473	0.412946	0.664491
REACTOME_FANCONI_ANEMIA_PATHWAY	20	1.01416	0.435835	0.665482
REACTOME_HOMOLOGOUS_RECOMBINATION_REPAIR_OF_REPLICATION_INDEPENDENT_DOUBLE_STRAND_BREAKS	15	1.01395	0.434448	0.665501
GO_ENZYME_LINKED_RECEPTOR_PROTEIN_SIGNALING_PATHWAY	469	1.01348	0.401997	0.666233
GO_NEGATIVE_REGULATION_OF_EPITHELIAL_CELL_MIGRATION	32	1.01301	0.427107	0.666949
GO_REGULATION_OF_CELLULAR_EXTRAVASATION	15	1.01287	0.431114	0.66677
GO_REGULATION_OF_EPITHELIAL_TO_MESENCHYMAL_TRANSITION	41	1.01273	0.423888	0.666557
GO_REGULATION_OF_B_CELL_APOPTOTIC_PROCESS	17	1.0121	0.43783	0.667771
GO_DEFENSE_RESPONSE_TO_VIRUS	126	1.01153	0.418795	0.668755
REACTOME_METABOLISM_OF_LIPIDS_AND_LIPOPROTEINS	352	1.01133	0.411711	0.668723
REACTOME_SIGNALING_BY_THE_B_CELL_RECEPTOR_BCR	118	1.01064	0.420123	0.670057
GO_ZINC_ION_HOMEOSTASIS	17	1.01053	0.438078	0.669801
GO_POSITIVE_REGULATION_OF_CELL_JUNCTION_ASSEMBLY	15	1.0101	0.442526	0.670438
GO_POSITIVE_REGULATION_OF_CYTOKINE_PRODUCTION_INVOLVED_IN_IMMUNE_RESPONSE	27	1.00825	0.436852	0.674953
GO_REGULATION_OF_STRIATED_MUSCLE_CELL_DIFFERENTIATION	53	1.00763	0.434855	0.676069
GO_RAC_PROTEIN_SIGNAL_TRANSDUCTION	16	1.00742	0.440418	0.676078
GO_MODULATION_BY_VIRUS_OF_HOST_MORPHOLOGY_OR_PHYSIOLOGY	34	1.00741	0.43069	0.675531
GO_CELL_FATE_COMMITMENT	94	1.00693	0.430563	0.676304
GO_COENZYME_METABOLIC_PROCESS	211	1.00621	0.426004	0.677719
GO_REGULATION_OF_MYELOID_CELL_DIFFERENTIATION	133	1.00569	0.440625	0.678564
GO_NEGATIVE_REGULATION_OF_VIRAL_GENOME_REPLICATION	44	1.00544	0.434903	0.678708
GO_HEME_METABOLIC_PROCESS	25	1.0049	0.44565	0.679592
GO_REGULATION_OF_SYSTEM_PROCESS	263	1.00375	0.438576	0.682177
GO_POSITIVE_REGULATION_OF_SMOOTH_MUSCLE_CELL_PROLIFERATION	46	1.00245	0.443229	0.685228
GO_POLYOL_METABOLIC_PROCESS	73	1.00217	0.450325	0.685425
GO_CELLULAR_RESPONSE_TO_MECHANICAL_STIMULUS	61	1.00209	0.44404	0.685076
GO_RESPONSE_TO_ATP	22	1.00203	0.444547	0.68466
GO_B_CELL_HOMEOSTASIS	18	1.0013	0.443308	0.686106
GO_GENITALIA_DEVELOPMENT	21	1.00026	0.451858	0.688358
REACTOME_NUCLEOTIDE_BINDING_DOMAIN_LEUCINE_RICH_REPEAT_CONTAINING_RECEPTOR_NLR_SIGNALING_PATHWAYS	43	1.00023	0.452014	0.687866
GO_OSTEOCLAST_DIFFERENTIATION	25	0.999852	0.446999	0.688347
GO_COENZYME_BIOSYNTHETIC_PROCESS	106	0.99944	0.446348	0.68891
GO_ANION_TRANSMEMBRANE_TRANSPORT	136	0.999371	0.455096	0.688528
GO_AMINOGLYCAN_CATABOLIC_PROCESS	38	0.99896	0.442989	0.689095
GO_POSITIVE_REGULATION_OF_CALCIUM_ION_TRANSMEMBRANE_TRANSPORTER_ACTIVITY	18	0.998706	0.450954	0.689235
GO_PLATELET_AGGREGATION	30	0.99671	0.456335	0.694159
REACTOME_GLUCOSE_METABOLISM	53	0.996523	0.453494	0.694103
GO_POSITIVE_REGULATION_OF_BIOMINERAL_TISSUE_DEVELOPMENT	22	0.996097	0.462435	0.694701
GO_REGULATION_OF_RUFFLE_ASSEMBLY	15	0.995927	0.455918	0.694603
REACTOME_ACTIVATION_OF_BH3_ONLY_PROTEINS	16	0.995704	0.461062	0.694643
GO_ACTIVATION_OF_PROTEIN_KINASE_ACTIVITY	204	0.995654	0.46175	0.694212
GO_AMEBOIDAL_TYPE_CELL_MIGRATION	89	0.994569	0.463109	0.696602
GO_NEGATIVE_REGULATION_OF_PROTEIN_SECRETION	65	0.994566	0.465862	0.69604
GO_REGULATION_OF_AMINE_TRANSPORT	30	0.994518	0.465879	0.695599
GO_OVULATION_CYCLE_PROCESS	49	0.994289	0.457871	0.695646
GO_LOCALIZATION_WITHIN_MEMBRANE	97	0.994263	0.467029	0.695145
GO_T_CELL_ACTIVATION_INVOLVED_IN_IMMUNE_RESPONSE	34	0.993592	0.457182	0.696425
GO_ASTROCYTE_DIFFERENTIATION	21	0.99245	0.460139	0.699002
GO_L_ALPHA_AMINO_ACID_TRANSMEMBRANE_TRANSPORT	20	0.990963	0.458936	0.702518
GO_ANION_HOMEOSTASIS	22	0.990306	0.462086	0.703768
GO_COFACTOR_BIOSYNTHETIC_PROCESS	142	0.990132	0.47442	0.703679
GO_ISOPRENOID_BIOSYNTHETIC_PROCESS	20	0.989907	0.466326	0.703721
GO_GUANOSINE_CONTAINING_COMPOUND_METABOLIC_PROCESS	35	0.989527	0.46487	0.704188
GO_EPIDERMIS_DEVELOPMENT	113	0.989438	0.475888	0.703857
GO_POSITIVE_REGULATION_OF_RECEPTOR_MEDIATED_ENDOCYTOSIS	31	0.989166	0.467204	0.704033
GO_NEUROEPITHELIAL_CELL_DIFFERENTIATION	37	0.989015	0.467798	0.703867
GO_REGULATION_OF_EXOCYTOSIS	110	0.988278	0.473	0.705331
GO_DEFENSE_RESPONSE_TO_OTHER_ORGANISM	295	0.988255	0.492444	0.704822
GO_CELL_SURFACE_RECEPTOR_SIGNALING_PATHWAY_INVOLVED_IN_CELL_CELL_SIGNALING	33	0.98753	0.472101	0.706233
GO_RESPONSE_TO_DEXAMETHASONE	18	0.987409	0.466652	0.70599
GO_RESPONSE_TO_VIRUS	192	0.987007	0.482703	0.706526
GO_MITOTIC_CYTOKINESIS	26	0.985373	0.472557	0.710457
GO_LUNG_ALVEOLUS_DEVELOPMENT	22	0.984622	0.483536	0.711944
GO_POSITIVE_REGULATION_OF_WOUND_HEALING	33	0.984569	0.479889	0.711518
GO_APOPTOTIC_SIGNALING_PATHWAY	245	0.984321	0.500847	0.711625
GO_NEUROTRANSMITTER_TRANSPORT	72	0.98425	0.485749	0.711247
GO_TRANSFORMING_GROWTH_FACTOR_BETA_RECEPTOR_SIGNALING_PATHWAY	76	0.983875	0.478356	0.711699
GO_PYRIMIDINE_NUCLEOTIDE_METABOLIC_PROCESS	39	0.983543	0.476916	0.712056
GO_REGULATION_OF_RHODOPSIN_MEDIATED_SIGNALING_PATHWAY	15	0.983492	0.476285	0.711624
GO_POSITIVE_REGULATION_OF_NUCLEOCYTOPLASMIC_TRANSPORT	89	0.983484	0.495461	0.711075
GO_POSITIVE_REGULATION_OF_DNA_REPLICATION	61	0.983434	0.47563	0.710648
REACTOME_BRANCHED_CHAIN_AMINO_ACID_CATABOLISM	17	0.983198	0.472308	0.710732
GO_SEX_DIFFERENTIATION	142	0.982196	0.493798	0.712945
GO_REGULATION_OF_NEUROTRANSMITTER_TRANSPORT	38	0.981793	0.480483	0.713494
GO_POSITIVE_REGULATION_OF_RESPONSE_TO_CYTOKINE_STIMULUS	32	0.980219	0.492507	0.717256
GO_REGULATION_OF_CYTOKINESIS	47	0.9801	0.483322	0.717008
GO_DEPHOSPHORYLATION	217	0.979578	0.509874	0.717881
GO_RNA_METHYLATION	50	0.979303	0.485507	0.718081
REACTOME_TOLL_RECEPTOR_CASCADES	106	0.978664	0.502911	0.719257
GO_NEGATIVE_REGULATION_OF_PROTEIN_POLYMERIZATION	40	0.978194	0.480948	0.719994
GO_TRABECULA_MORPHOGENESIS	23	0.977971	0.485474	0.720026
GO_SECOND_MESSENGER_MEDIATED_SIGNALING	84	0.976916	0.497409	0.722361
GO_WATER_SOLUBLE_VITAMIN_METABOLIC_PROCESS	67	0.976848	0.491497	0.721985
GO_AUDITORY_RECEPTOR_CELL_DIFFERENTIATION	19	0.976755	0.482599	0.721672
GO_ENTRAINMENT_OF_CIRCADIAN_CLOCK	22	0.976675	0.486974	0.72133
GO_MORPHOGENESIS_OF_AN_EPITHELIUM	233	0.972507	0.546505	0.732245
GO_AMINE_METABOLIC_PROCESS	85	0.972189	0.506369	0.732545
REACTOME_DOWNSTREAM_SIGNAL_TRANSDUCTION	79	0.971492	0.511786	0.733887
GO_FOLIC_ACID_METABOLIC_PROCESS	15	0.971133	0.488859	0.7343
GO_POSITIVE_REGULATION_OF_APOPTOTIC_SIGNALING_PATHWAY	156	0.97113	0.529536	0.733728
GO_ACTIVATION_OF_GTPASE_ACTIVITY	58	0.970856	0.501169	0.733891
REACTOME_SIGNALING_BY_CONSTITUTIVELY_ACTIVE_EGFR	15	0.97043	0.494954	0.734478
GO_ANATOMICAL_STRUCTURE_MATURATION	24	0.970111	0.498197	0.734787
GO_CARDIAC_CONDUCTION	37	0.970018	0.49669	0.734472
GO_RETINA_DEVELOPMENT_IN_CAMERA_TYPE_EYE	67	0.96922	0.516647	0.736104
GO_POSITIVE_REGULATION_OF_CELL_DEVELOPMENT	287	0.969036	0.562462	0.736029
GO_MYELOID_CELL_ACTIVATION_INVOLVED_IN_IMMUNE_RESPONSE	29	0.968376	0.495417	0.737283
GO_RESPONSE_TO_PEPTIDE	267	0.967221	0.560187	0.739893
GO_MULTICELLULAR_ORGANISMAL_HOMEOSTASIS	150	0.967043	0.541226	0.739799
GO_REGULATION_OF_MUSCLE_CELL_APOPTOTIC_PROCESS	28	0.966352	0.504624	0.741129
GO_REGULATION_OF_PROTEIN_COMPLEX_ASSEMBLY	296	0.966224	0.576854	0.740899
REACTOME_ASSOCIATION_OF_TRIC_CCT_WITH_TARGET_PROTEINS_DURING_BIOSYNTHESIS	26	0.965924	0.509998	0.741154
GO_VASCULATURE_DEVELOPMENT	307	0.965908	0.566628	0.740617
GO_MYD88_DEPENDENT_TOLL_LIKE_RECEPTOR_SIGNALING_PATHWAY	30	0.965491	0.514385	0.741173
REACTOME_RESPONSE_TO_ELEVATED_PLATELET_CYTOSOLIC_CA2_	56	0.964734	0.511334	0.742667
GO_PRIMARY_ALCOHOL_METABOLIC_PROCESS	29	0.963569	0.508142	0.745324
GO_POSITIVE_REGULATION_OF_ERBB_SIGNALING_PATHWAY	23	0.963313	0.502098	0.74546
GO_ERBB_SIGNALING_PATHWAY	58	0.963133	0.518013	0.745373
GO_POSITIVE_REGULATION_OF_DENDRITE_DEVELOPMENT	42	0.962997	0.513026	0.74517
GO_PROTEIN_TARGETING_TO_PLASMA_MEMBRANE	15	0.962839	0.501727	0.745021
GO_PROTEIN_HETEROOLIGOMERIZATION	74	0.962029	0.526087	0.746663
GO_NEGATIVE_REGULATION_OF_DENDRITE_DEVELOPMENT	18	0.961831	0.500871	0.746623
GO_POSITIVE_REGULATION_OF_PEPTIDE_SECRETION	51	0.961551	0.514266	0.746829
GO_NEGATIVE_REGULATION_OF_FIBROBLAST_PROLIFERATION	23	0.960996	0.509989	0.747777
GO_NEURON_NEURON_SYNAPTIC_TRANSMISSION	27	0.960428	0.507243	0.748762
GO_MESONEPHROS_DEVELOPMENT	40	0.958897	0.520064	0.752399
GO_CELLULAR_RESPONSE_TO_STEROID_HORMONE_STIMULUS	143	0.958192	0.555985	0.753765
GO_CELLULAR_RESPONSE_TO_HEAT	27	0.958154	0.513483	0.753289
GO_REGULATION_OF_CYCLIC_NUCLEOTIDE_METABOLIC_PROCESS	72	0.958142	0.53485	0.752739
GO_POSITIVE_REGULATION_OF_NEURON_DEATH	54	0.957816	0.527726	0.753056
GO_PROTEIN_PALMITOYLATION	21	0.957814	0.510466	0.752482
GO_LEUKOCYTE_DEGRANULATION	21	0.957643	0.517979	0.752365
REACTOME_NFKB_AND_MAP_KINASES_ACTIVATION_MEDIATED_BY_TLR4_SIGNALING_REPERTOIRE	66	0.957581	0.530844	0.751963
GO_POST_EMBRYONIC_DEVELOPMENT	63	0.956903	0.533301	0.753218
GO_REGULATION_OF_CIRCADIAN_RHYTHM	63	0.956883	0.533974	0.752689
GO_POSITIVE_REGULATION_OF_ORGAN_GROWTH	19	0.956676	0.510638	0.752687
GO_T_CELL_PROLIFERATION	32	0.95605	0.522551	0.753826
GO_REGULATION_OF_NITRIC_OXIDE_SYNTHASE_BIOSYNTHETIC_PROCESS	15	0.955945	0.514143	0.753542
GO_CARBOHYDRATE_DERIVATIVE_BIOSYNTHETIC_PROCESS	415	0.955381	0.639015	0.754492
GO_INTERSTRAND_CROSS_LINK_REPAIR	40	0.954578	0.525597	0.756106
GO_VISUAL_BEHAVIOR	29	0.952988	0.532832	0.759908
GO_MONOSACCHARIDE_CATABOLIC_PROCESS	47	0.951225	0.530439	0.764152
GO_GLAND_MORPHOGENESIS	57	0.950366	0.550487	0.765917
GO_POSITIVE_REGULATION_OF_STEM_CELL_DIFFERENTIATION	30	0.950169	0.523143	0.765872
GO_CELLULAR_RESPONSE_TO_HORMONE_STIMULUS	359	0.950052	0.646163	0.765611
GO_RESPONSE_TO_INSULIN	149	0.949799	0.587722	0.765726
GO_REGULATION_OF_PROTEIN_TARGETING_TO_MEMBRANE	18	0.94963	0.531593	0.7656
GO_NUCLEOSIDE_BISPHOSPHATE_METABOLIC_PROCESS	29	0.949544	0.534221	0.76526
REACTOME_NUCLEAR_SIGNALING_BY_ERBB4	24	0.949496	0.53053	0.764807
GO_POSITIVE_REGULATION_OF_CAMP_METABOLIC_PROCESS	41	0.949297	0.545835	0.764764
GO_AXONEME_ASSEMBLY	22	0.948746	0.522636	0.765691
GO_NEGATIVE_REGULATION_OF_B_CELL_ACTIVATION	24	0.948706	0.531094	0.765216
GO_RESPONSE_TO_MURAMYL_DIPEPTIDE	15	0.948509	0.529568	0.765178
GO_SIGNAL_RELEASE	89	0.94822	0.560399	0.76537
GO_REGULATION_OF_VIRAL_GENOME_REPLICATION	67	0.94805	0.554882	0.765248
REACTOME_STEROID_HORMONES	15	0.947443	0.523494	0.766327
GO_HAIR_CELL_DIFFERENTIATION	22	0.947313	0.532989	0.766101
GO_CENTROSOME_DUPLICATION	30	0.946355	0.532781	0.7681
GO_NEGATIVE_REGULATION_OF_TELOMERE_MAINTENANCE_VIA_TELOMERE_LENGTHENING	17	0.945789	0.533745	0.76903
GO_MEMBRANE_BIOGENESIS	19	0.943892	0.530499	0.773602
GO_NEPHRON_EPITHELIUM_DEVELOPMENT	39	0.943563	0.53977	0.77393
REACTOME_SIGNAL_TRANSDUCTION_BY_L1	30	0.94356	0.535755	0.773355
GO_ERBB2_SIGNALING_PATHWAY	28	0.943543	0.540334	0.772818
GO_REGULATION_OF_PROTEIN_AUTOPHOSPHORYLATION	27	0.942097	0.539172	0.776168
GO_DEOXYRIBONUCLEOTIDE_METABOLIC_PROCESS	32	0.941818	0.541284	0.77634
REACTOME_MEIOTIC_SYNAPSIS	49	0.941802	0.55888	0.7758
GO_POSITIVE_REGULATION_OF_CYTOPLASMIC_TRANSPORT	205	0.941627	0.631286	0.775689
GO_REGULATION_OF_VASCULAR_PERMEABILITY	19	0.941613	0.534343	0.775145
GO_NEUROMUSCULAR_PROCESS_CONTROLLING_BALANCE	28	0.941536	0.531222	0.774768
GO_POSITIVE_REGULATION_OF_DEVELOPMENTAL_GROWTH	95	0.941192	0.573217	0.775115
GO_ARACHIDONIC_ACID_METABOLIC_PROCESS	23	0.940653	0.534471	0.775975
GO_POSITIVE_REGULATION_OF_MYOTUBE_DIFFERENTIATION	18	0.940425	0.53796	0.775994
GO_POSITIVE_REGULATION_OF_RESPONSE_TO_BIOTIC_STIMULUS	30	0.939934	0.545455	0.776731
GO_HOMEOSTASIS_OF_NUMBER_OF_CELLS	131	0.939631	0.604393	0.77697
GO_MYELOID_LEUKOCYTE_ACTIVATION	74	0.939554	0.570522	0.776598
GO_MESENCHYMAL_CELL_DIFFERENTIATION	63	0.93943	0.561122	0.776356
REACTOME_INTEGRIN_CELL_SURFACE_INTERACTIONS	55	0.938627	0.558659	0.777939
REACTOME_NGF_SIGNALLING_VIA_TRKA_FROM_THE_PLASMA_MEMBRANE	115	0.937861	0.598102	0.779424
GO_POSITIVE_REGULATION_OF_ORGANELLE_ORGANIZATION	438	0.93786	0.704913	0.778849
GO_CAMERA_TYPE_EYE_MORPHOGENESIS	50	0.937851	0.562543	0.778294
GO_POSITIVE_REGULATION_OF_EPITHELIAL_CELL_MIGRATION	66	0.936878	0.567117	0.780341
GO_POSITIVE_REGULATION_OF_INSULIN_SECRETION	41	0.936241	0.558044	0.781432
GO_BRANCHED_CHAIN_AMINO_ACID_METABOLIC_PROCESS	22	0.935506	0.543856	0.782816
GO_MONOSACCHARIDE_BIOSYNTHETIC_PROCESS	44	0.934938	0.559408	0.78375
GO_POSITIVE_REGULATION_OF_B_CELL_MEDIATED_IMMUNITY	18	0.934265	0.536368	0.784971
GO_REGULATION_OF_ACTIN_CYTOSKELETON_REORGANIZATION	21	0.933984	0.549068	0.785151
GO_CARBOHYDRATE_DERIVATIVE_CATABOLIC_PROCESS	127	0.933667	0.618129	0.785417
GO_POSITIVE_REGULATION_OF_PROTEIN_ACETYLATION	29	0.933346	0.554973	0.785684
GO_POSITIVE_REGULATION_OF_CELLULAR_RESPONSE_TO_INSULIN_STIMULUS	18	0.93275	0.543337	0.786694
GO_REGULATION_OF_SMOOTHENED_SIGNALING_PATHWAY	38	0.931784	0.559761	0.788706
REACTOME_VOLTAGE_GATED_POTASSIUM_CHANNELS	15	0.93174	0.544432	0.78824
GO_REGULATION_OF_GLUCOSE_METABOLIC_PROCESS	77	0.931592	0.599716	0.788048
GO_POSITIVE_REGULATION_OF_NITRIC_OXIDE_SYNTHASE_ACTIVITY	15	0.930958	0.543516	0.78916
GO_REGULATION_OF_POLYSACCHARIDE_METABOLIC_PROCESS	32	0.930558	0.56572	0.789625
GO_HISTONE_H4_ACETYLATION	39	0.930196	0.566434	0.790009
REACTOME_SIGNALING_BY_ERBB4	69	0.929424	0.588336	0.791481
GO_RELEASE_OF_CYTOCHROME_C_FROM_MITOCHONDRIA	21	0.92863	0.554834	0.792997
GO_PATTERNING_OF_BLOOD_VESSELS	21	0.928495	0.56173	0.792774
GO_MULTICELLULAR_ORGANISMAL_RESPONSE_TO_STRESS	34	0.928325	0.57107	0.792633
GO_ESTABLISHMENT_OF_PROTEIN_LOCALIZATION_TO_PLASMA_MEMBRANE	70	0.927912	0.592311	0.793157
GO_TISSUE_HOMEOSTASIS	99	0.927595	0.614702	0.793407
GO_POSITIVE_REGULATION_OF_MYELOID_CELL_DIFFERENTIATION	57	0.92718	0.589591	0.793938
GO_CYTOPLASMIC_MICROTUBULE_ORGANIZATION	36	0.927146	0.575131	0.793447
GO_NADP_METABOLIC_PROCESS	21	0.926243	0.548537	0.795283
GO_POSITIVE_REGULATION_OF_CELL_DIVISION	78	0.926014	0.620843	0.795297
GO_POSITIVE_REGULATION_OF_INTRACELLULAR_PROTEIN_TRANSPORT	192	0.925971	0.663489	0.794829
GO_DEVELOPMENTAL_PIGMENTATION	27	0.924458	0.564666	0.798241
GO_MICROTUBULE_POLYMERIZATION	25	0.923516	0.564632	0.800146
GO_ACTIVATION_OF_INNATE_IMMUNE_RESPONSE	183	0.923466	0.668287	0.799699
GO_PROTEIN_SECRETION	77	0.922482	0.608392	0.801716
REACTOME_NUCLEAR_RECEPTOR_TRANSCRIPTION_PATHWAY	29	0.921234	0.571823	0.804376
GO_POSITIVE_REGULATION_OF_STRIATED_MUSCLE_CELL_DIFFERENTIATION	29	0.921228	0.577521	0.803807
GO_REGULATION_OF_PROTEIN_COMPLEX_DISASSEMBLY	175	0.920928	0.674764	0.804
GO_POSITIVE_REGULATION_OF_BLOOD_VESSEL_ENDOTHELIAL_CELL_MIGRATION	15	0.919529	0.570573	0.807085
GO_PEPTIDYL_THREONINE_MODIFICATION	43	0.919245	0.584823	0.807242
GO_PEPTIDYL_CYSTEINE_MODIFICATION	18	0.918982	0.572275	0.807345
GO_MUSCLE_SYSTEM_PROCESS	150	0.918051	0.673491	0.809181
GO_NEGATIVE_REGULATION_OF_REGULATED_SECRETORY_PATHWAY	16	0.917623	0.56848	0.809731
REACTOME_SPHINGOLIPID_METABOLISM	51	0.917206	0.604137	0.810224
GO_TETRAHYDROFOLATE_METABOLIC_PROCESS	19	0.91696	0.580355	0.810292
REACTOME_METABOLISM_OF_STEROID_HORMONES_AND_VITAMINS_A_AND_D	16	0.916793	0.569969	0.810135
REACTOME_SIGNALING_BY_ILS	93	0.916167	0.633175	0.811171
GO_PROTEIN_DEPHOSPHORYLATION	148	0.915875	0.682895	0.811336
GO_RESPONSE_TO_ORGANOPHOSPHORUS	91	0.914843	0.64188	0.813396
REACTOME_OPIOID_SIGNALLING	51	0.914511	0.602917	0.813678
GO_GLYCEROPHOSPHOLIPID_METABOLIC_PROCESS	217	0.914299	0.709894	0.813642
REACTOME_METABOLISM_OF_NUCLEOTIDES	61	0.914294	0.621209	0.813071
REACTOME_ABC_FAMILY_PROTEINS_MEDIATED_TRANSPORT	18	0.912657	0.585292	0.816682
GO_POSITIVE_REGULATION_OF_KINASE_ACTIVITY	350	0.911947	0.782224	0.817939
GO_POSITIVE_REGULATION_OF_LYMPHOCYTE_APOPTOTIC_PROCESS	16	0.911458	0.575192	0.818605
GO_REGULATION_OF_UBIQUITIN_PROTEIN_LIGASE_ACTIVITY	15	0.911342	0.574815	0.818325
GO_PRESYNAPTIC_PROCESS_INVOLVED_IN_SYNAPTIC_TRANSMISSION	55	0.911014	0.619432	0.81858
GO_CELL_DIFFERENTIATION_INVOLVED_IN_KIDNEY_DEVELOPMENT	18	0.910028	0.581233	0.820528
GO_PATTERN_RECOGNITION_RECEPTOR_SIGNALING_PATHWAY	96	0.909908	0.646063	0.820242
GO_NEGATIVE_REGULATION_OF_MYELOID_CELL_DIFFERENTIATION	58	0.909152	0.622723	0.82163
GO_POSITIVE_REGULATION_OF_PROTEIN_SERINE_THREONINE_KINASE_ACTIVITY	217	0.909005	0.738141	0.821418
GO_REGULATION_OF_TYPE_I_INTERFERON_PRODUCTION	106	0.908752	0.669266	0.821469
GO_NEGATIVE_REGULATION_OF_INTRACELLULAR_TRANSPORT	108	0.90855	0.666582	0.821397
GO_RESPONSE_TO_ARSENIC_CONTAINING_SUBSTANCE	27	0.907974	0.597263	0.822285
GO_VIRAL_GENOME_REPLICATION	19	0.90793	0.57519	0.821821
GO_LEARNING	68	0.907516	0.635672	0.8223
REACTOME_CELL_JUNCTION_ORGANIZATION	34	0.907373	0.601848	0.822088
GO_SIGNAL_TRANSDUCTION_BY_PROTEIN_PHOSPHORYLATION	295	0.906511	0.7785	0.823671
GO_PIGMENT_CELL_DIFFERENTIATION	20	0.906257	0.593171	0.823746
GO_IRE1_MEDIATED_UNFOLDED_PROTEIN_RESPONSE	54	0.904981	0.632071	0.826381
GO_GLYCOSPHINGOLIPID_METABOLIC_PROCESS	47	0.904381	0.617431	0.827339
GO_NEURON_PROJECTION_REGENERATION	19	0.903526	0.597624	0.828949
GO_RRNA_METHYLATION	18	0.901835	0.588182	0.832591
GO_DETOXIFICATION	46	0.901375	0.627012	0.833158
GO_LEUKOCYTE_MEDIATED_CYTOTOXICITY	27	0.900842	0.60239	0.83392
GO_NEGATIVE_REGULATION_OF_FATTY_ACID_METABOLIC_PROCESS	17	0.90045	0.592054	0.834319
GO_RNA_PHOSPHODIESTER_BOND_HYDROLYSIS_ENDONUCLEOLYTIC	49	0.900169	0.641407	0.83443
GO_METENCEPHALON_DEVELOPMENT	57	0.899581	0.644434	0.835309
GO_INOSITOL_LIPID_MEDIATED_SIGNALING	72	0.8994	0.657812	0.83518
REACTOME_REGULATION_OF_WATER_BALANCE_BY_RENAL_AQUAPORINS	25	0.89912	0.601701	0.835285
GO_REGULATION_OF_TUMOR_NECROSIS_FACTOR_BIOSYNTHETIC_PROCESS	15	0.899043	0.586133	0.834895
GO_METAPHASE_PLATE_CONGRESSION	37	0.89888	0.620998	0.834703
GO_NEGATIVE_REGULATION_OF_SMOOTH_MUSCLE_CELL_PROLIFERATION	23	0.898375	0.603672	0.835373
GO_ESTABLISHMENT_OF_EPITHELIAL_CELL_POLARITY	16	0.897943	0.604554	0.835861
GO_REGULATION_OF_INTERFERON_ALPHA_PRODUCTION	19	0.897757	0.597008	0.835727
GO_MUCOPOLYSACCHARIDE_METABOLIC_PROCESS	67	0.897009	0.666508	0.836984
GO_MAINTENANCE_OF_LOCATION_IN_CELL	81	0.896798	0.667237	0.836908
GO_REGULATION_OF_ENDOTHELIAL_CELL_APOPTOTIC_PROCESS	21	0.896613	0.595928	0.836779
GO_NUCLEOTIDE_EXCISION_REPAIR_DNA_DUPLEX_UNWINDING	21	0.895636	0.603928	0.838609
GO_NEUTRAL_LIPID_METABOLIC_PROCESS	51	0.895566	0.646165	0.838194
GO_OVARIAN_FOLLICLE_DEVELOPMENT	37	0.895474	0.628944	0.837837
GO_GLAND_DEVELOPMENT	236	0.894858	0.782319	0.838785
REACTOME_ANTIGEN_PROCESSING_CROSS_PRESENTATION	68	0.894329	0.672151	0.839496
GO_REGULATION_OF_SMOOTH_MUSCLE_CELL_PROLIFERATION	72	0.893139	0.676311	0.841827
REACTOME_P75_NTR_RECEPTOR_MEDIATED_SIGNALLING	68	0.892142	0.674696	0.843698
GO_POSITIVE_REGULATION_OF_MITOTIC_CELL_CYCLE	94	0.892098	0.698768	0.843217
GO_POSITIVE_REGULATION_OF_VASCULAR_ENDOTHELIAL_GROWTH_FACTOR_PRODUCTION	17	0.892096	0.602174	0.842635
REACTOME_MAP_KINASE_ACTIVATION_IN_TLR_CASCADE	46	0.891715	0.648006	0.842963
REACTOME_TRIF_MEDIATED_TLR3_SIGNALING	68	0.890794	0.685714	0.844604
GO_POSITIVE_REGULATION_OF_MYELOID_LEUKOCYTE_DIFFERENTIATION	33	0.89064	0.638351	0.8444
GO_LAMELLIPODIUM_ASSEMBLY	25	0.889224	0.616287	0.847268
GO_REGULATION_OF_SENSORY_PERCEPTION	20	0.889223	0.62912	0.846685
GO_ANTERIOR_POSTERIOR_AXIS_SPECIFICATION	21	0.888654	0.621414	0.847504
GO_POSITIVE_REGULATION_OF_FAT_CELL_DIFFERENTIATION	30	0.888494	0.630367	0.8473
GO_MACROPHAGE_DIFFERENTIATION	15	0.887724	0.60234	0.848567
GO_POSITIVE_REGULATION_OF_PROTEOLYSIS	310	0.887218	0.846831	0.849192
GO_EMBRYONIC_HEART_TUBE_DEVELOPMENT	42	0.886651	0.655992	0.849984
REACTOME_IL_3_5_AND_GM_CSF_SIGNALING	35	0.886454	0.639498	0.849865
GO_CELLULAR_RESPONSE_TO_NITROGEN_COMPOUND	332	0.886424	0.847688	0.849349
GO_KIDNEY_MORPHOGENESIS	33	0.886389	0.646386	0.848846
GO_NEGATIVE_REGULATION_OF_NF_KAPPAB_TRANSCRIPTION_FACTOR_ACTIVITY	55	0.886243	0.657819	0.848612
GO_REGULATION_OF_RECEPTOR_BIOSYNTHETIC_PROCESS	18	0.886115	0.61286	0.848336
GO_REGULATION_OF_NUCLEAR_DIVISION	117	0.884546	0.733676	0.851533
GO_DEFENSE_RESPONSE_TO_BACTERIUM	104	0.884546	0.714249	0.850948
GO_POSITIVE_REGULATION_OF_CATION_CHANNEL_ACTIVITY	19	0.884453	0.618479	0.850587
GO_NEGATIVE_REGULATION_OF_BINDING	97	0.884265	0.722125	0.850453
GO_REGULATION_OF_SKELETAL_MUSCLE_TISSUE_DEVELOPMENT	25	0.883132	0.635153	0.852561
GO_NEGATIVE_REGULATION_OF_EMBRYONIC_DEVELOPMENT	15	0.882463	0.612875	0.853582
GO_REGULATION_OF_NECROTIC_CELL_DEATH	22	0.882051	0.634017	0.853979
GO_MICROTUBULE_BASED_MOVEMENT	141	0.880666	0.767642	0.85663
GO_NEUROMUSCULAR_PROCESS	47	0.880656	0.670841	0.856065
GO_MUSCLE_TISSUE_DEVELOPMENT	141	0.880199	0.75909	0.856523
GO_MEMBRANE_PROTEIN_ECTODOMAIN_PROTEOLYSIS	18	0.879741	0.62585	0.857016
GO_REGULATION_OF_CELLULAR_AMINO_ACID_METABOLIC_PROCESS	57	0.879427	0.691992	0.857173
GO_POSITIVE_REGULATION_OF_INTRACELLULAR_TRANSPORT	275	0.879304	0.84844	0.856874
GO_NUCLEOSIDE_PHOSPHATE_CATABOLIC_PROCESS	51	0.879194	0.679149	0.856541
GO_NUCLEOTIDE_EXCISION_REPAIR_PREINCISION_COMPLEX_STABILIZATION	20	0.878126	0.628604	0.858462
REACTOME_NRAGE_SIGNALS_DEATH_THROUGH_JNK	33	0.877964	0.654737	0.858255
GO_REGULATION_OF_RHO_PROTEIN_SIGNAL_TRANSDUCTION	77	0.875912	0.719554	0.862433
GO_LIPOSACCHARIDE_METABOLIC_PROCESS	86	0.875714	0.725994	0.8623
GO_VERY_LONG_CHAIN_FATTY_ACID_METABOLIC_PROCESS	19	0.875337	0.626411	0.862583
GO_NEGATIVE_REGULATION_OF_TYPE_I_INTERFERON_PRODUCTION	39	0.875327	0.678605	0.862018
GO_CARDIOCYTE_DIFFERENTIATION	46	0.874417	0.681389	0.863537
GO_MORPHOGENESIS_OF_AN_EPITHELIAL_SHEET	30	0.874193	0.659246	0.863465
GO_MITOTIC_G2_M_TRANSITION_CHECKPOINT	15	0.874055	0.627786	0.8632
GO_ALPHA_AMINO_ACID_BIOSYNTHETIC_PROCESS	58	0.872264	0.707386	0.866737
GO_REGULATION_OF_TRANSCRIPTION_FROM_RNA_POLYMERASE_I_PROMOTER	20	0.871964	0.647834	0.866836
GO_ORGANIC_HYDROXY_COMPOUND_TRANSPORT	86	0.869415	0.739645	0.872067
GO_FC_RECEPTOR_SIGNALING_PATHWAY	169	0.869377	0.81195	0.87157
GO_DEVELOPMENT_OF_PRIMARY_SEXUAL_CHARACTERISTICS	121	0.868431	0.766383	0.873158
REACTOME_A_TETRASACCHARIDE_LINKER_SEQUENCE_IS_REQUIRED_FOR_GAG_SYNTHESIS	16	0.867669	0.645455	0.874305
GO_REGULATION_OF_CYTOPLASMIC_TRANSPORT	363	0.867482	0.918978	0.874145
GO_ENDOCRINE_SYSTEM_DEVELOPMENT	54	0.866392	0.71271	0.876008
GO_REGULATION_OF_NEUROTRANSMITTER_SECRETION	31	0.864083	0.678924	0.880601
GO_REGULATION_OF_INTRACELLULAR_STEROID_HORMONE_RECEPTOR_SIGNALING_PATHWAY	46	0.86277	0.698148	0.882938
GO_MONOVALENT_INORGANIC_CATION_HOMEOSTASIS	75	0.862689	0.735148	0.882515
GO_POSITIVE_REGULATION_OF_NERVOUS_SYSTEM_DEVELOPMENT	251	0.862292	0.878013	0.882799
GO_REGULATION_OF_BLOOD_CIRCULATION	141	0.861249	0.81145	0.884528
GO_RRNA_MODIFICATION	26	0.860453	0.666818	0.88571
GO_REGULATION_OF_CARBOHYDRATE_BIOSYNTHETIC_PROCESS	61	0.860095	0.729939	0.885907
GO_LYTIC_VACUOLE_ORGANIZATION	46	0.860039	0.7024	0.885438
GO_NEGATIVE_REGULATION_OF_CYCLIC_NUCLEOTIDE_METABOLIC_PROCESS	15	0.859078	0.657709	0.886973
GO_BRANCHING_INVOLVED_IN_URETERIC_BUD_MORPHOGENESIS	18	0.858348	0.652561	0.887997
GO_INACTIVATION_OF_MAPK_ACTIVITY	21	0.858091	0.669938	0.88797
GO_POSITIVE_REGULATION_OF_NEURON_PROJECTION_DEVELOPMENT	158	0.857537	0.828655	0.888592
GO_CYTOLYSIS	15	0.857055	0.657796	0.889052
GO_POSITIVE_REGULATION_OF_EPITHELIAL_CELL_APOPTOTIC_PROCESS	16	0.856682	0.653298	0.889255
GO_REGULATION_OF_INSULIN_RECEPTOR_SIGNALING_PATHWAY	33	0.85551	0.68614	0.891189
GO_EPIDERMAL_GROWTH_FACTOR_RECEPTOR_SIGNALING_PATHWAY	41	0.854644	0.704179	0.892478
GO_REGULATION_OF_ESTABLISHMENT_OF_PLANAR_POLARITY	96	0.854287	0.778881	0.892649
GO_NEGATIVE_REGULATION_OF_CELL_SUBSTRATE_ADHESION	35	0.853241	0.705208	0.894316
REACTOME_SYNTHESIS_OF_GLYCOSYLPHOSPHATIDYLINOSITOL_GPI	16	0.852584	0.664342	0.895134
GO_PTERIDINE_CONTAINING_COMPOUND_BIOSYNTHETIC_PROCESS	17	0.852173	0.661243	0.895412
GO_NON_CANONICAL_WNT_SIGNALING_PATHWAY	112	0.851115	0.8	0.897066
GO_JNK_CASCADE	68	0.850593	0.749817	0.897583
GO_PREASSEMBLY_OF_GPI_ANCHOR_IN_ER_MEMBRANE	15	0.849673	0.66329	0.898929
GO_CHROMOSOME_ORGANIZATION_INVOLVED_IN_MEIOTIC_CELL_CYCLE	31	0.847415	0.699016	0.903092
GO_POSITIVE_REGULATION_OF_LEUKOCYTE_DEGRANULATION	15	0.847335	0.667983	0.902661
GO_REGULATION_OF_MICROTUBULE_BASED_PROCESS	196	0.84697	0.876206	0.902844
GO_REGULATION_OF_CARTILAGE_DEVELOPMENT	32	0.846741	0.699842	0.902717
GO_REGULATION_OF_HEART_CONTRACTION	106	0.846473	0.812106	0.902686
GO_REACTIVE_OXYGEN_SPECIES_BIOSYNTHETIC_PROCESS	18	0.846058	0.664176	0.902949
GO_POSITIVE_CHEMOTAXIS	21	0.845532	0.683404	0.903464
GO_MESENCHYME_DEVELOPMENT	86	0.844362	0.786108	0.9053
GO_REGULATION_OF_SYNCYTIUM_FORMATION_BY_PLASMA_MEMBRANE_FUSION	15	0.84432	0.668135	0.904788
GO_HYDROGEN_PEROXIDE_METABOLIC_PROCESS	16	0.844156	0.669767	0.904527
GO_FEAR_RESPONSE	16	0.843969	0.671294	0.904327
GO_HISTONE_H3_DEACETYLATION	21	0.843914	0.684634	0.903844
GO_DNA_DEPENDENT_DNA_REPLICATION	84	0.843583	0.792448	0.90391
GO_POSITIVE_REGULATION_OF_TRANSPORTER_ACTIVITY	44	0.843416	0.73567	0.903656
GO_REGULATION_OF_ACTIVIN_RECEPTOR_SIGNALING_PATHWAY	17	0.841325	0.692708	0.907365
GO_ENDOCRINE_PANCREAS_DEVELOPMENT	17	0.841298	0.688269	0.906829
GO_CYTOSKELETON_DEPENDENT_INTRACELLULAR_TRANSPORT	92	0.840761	0.807308	0.907325
GO_HEXOSE_CATABOLIC_PROCESS	38	0.839507	0.721574	0.90929
REACTOME_CELL_DEATH_SIGNALLING_VIA_NRAGE_NRIF_AND_NADE	48	0.836435	0.749702	0.914883
GO_TUBE_FORMATION	87	0.835916	0.800589	0.915307
GO_BODY_MORPHOGENESIS	28	0.835868	0.714317	0.914803
GO_NADH_METABOLIC_PROCESS	29	0.835344	0.730813	0.915249
GO_REGULATION_OF_CHOLESTEROL_METABOLIC_PROCESS	17	0.83509	0.687054	0.91515
REACTOME_PHOSPHOLIPID_METABOLISM	159	0.834697	0.877043	0.915323
GO_MODULATION_OF_SYNAPTIC_TRANSMISSION	159	0.833383	0.87676	0.917332
GO_LENS_FIBER_CELL_DIFFERENTIATION	16	0.832704	0.693091	0.918048
GO_AMMONIUM_ION_METABOLIC_PROCESS	107	0.832382	0.834309	0.918073
REACTOME_MAPK_TARGETS_NUCLEAR_EVENTS_MEDIATED_BY_MAP_KINASES	29	0.83233	0.721717	0.917575
GO_REGULATION_OF_PEPTIDYL_THREONINE_PHOSPHORYLATION	26	0.832176	0.719064	0.917281
GO_STEM_CELL_PROLIFERATION	30	0.832072	0.720128	0.916886
REACTOME_PLC_BETA_MEDIATED_EVENTS	25	0.830754	0.711987	0.918888
GO_ANTIGEN_PROCESSING_AND_PRESENTATION_OF_EXOGENOUS_PEPTIDE_ANTIGEN_VIA_MHC_CLASS_I	62	0.830394	0.784407	0.918986
GO_STEROL_TRANSPORT	31	0.830269	0.729979	0.918641
GO_MIDBRAIN_DEVELOPMENT	59	0.830004	0.781924	0.918562
GO_POSITIVE_REGULATION_OF_AXON_EXTENSION	29	0.829765	0.729109	0.918425
GO_ADHERENS_JUNCTION_ORGANIZATION	42	0.829655	0.754765	0.918044
GO_CALCIUM_MEDIATED_SIGNALING	51	0.829276	0.762704	0.91817
GO_POSITIVE_REGULATION_OF_MUSCLE_TISSUE_DEVELOPMENT	27	0.828739	0.725596	0.918596
GO_EMBRYONIC_EYE_MORPHOGENESIS	16	0.827155	0.694569	0.921062
GO_POSITIVE_REGULATION_OF_CYSTEINE_TYPE_ENDOPEPTIDASE_ACTIVITY_INVOLVED_IN_APOPTOTIC_SIGNALING_PATHWAY	17	0.826603	0.705154	0.92151
GO_METHIONINE_METABOLIC_PROCESS	16	0.826554	0.704165	0.92101
GO_ANATOMICAL_STRUCTURE_HOMEOSTASIS	191	0.826374	0.915536	0.920762
GO_REGULATION_OF_OXIDATIVE_STRESS_INDUCED_CELL_DEATH	38	0.826153	0.751148	0.920592
GO_PLASMA_MEMBRANE_ORGANIZATION	142	0.82613	0.884008	0.920044
GO_REGULATION_OF_MITOPHAGY	42	0.825917	0.768999	0.919849
GO_PHOSPHATIDYLSERINE_METABOLIC_PROCESS	17	0.825852	0.705739	0.919375
GO_REGULATION_OF_PROTEIN_TARGETING	230	0.824875	0.936809	0.920634
GO_INTRINSIC_APOPTOTIC_SIGNALING_PATHWAY_IN_RESPONSE_TO_DNA_DAMAGE	64	0.8247	0.797574	0.920369
GO_CARDIAC_MUSCLE_TISSUE_MORPHOGENESIS	25	0.823707	0.720601	0.921633
GO_SPHINGOLIPID_METABOLIC_PROCESS	99	0.822966	0.850873	0.922427
GO_REGULATION_OF_DNA_BIOSYNTHETIC_PROCESS	76	0.822437	0.81816	0.922842
GO_NEGATIVE_REGULATION_OF_CELLULAR_AMIDE_METABOLIC_PROCESS	113	0.822269	0.84864	0.922561
GO_VENTRICULAR_SEPTUM_MORPHOGENESIS	16	0.821905	0.703349	0.92263
GO_GOLGI_TO_VACUOLE_TRANSPORT	27	0.82176	0.730542	0.922304
GO_NEGATIVE_REGULATION_OF_CYTOSKELETON_ORGANIZATION	169	0.821357	0.900457	0.922467
GO_REGULATION_OF_MICROTUBULE_POLYMERIZATION_OR_DEPOLYMERIZATION	145	0.820994	0.891941	0.922541
GO_ACTIVATION_OF_JUN_KINASE_ACTIVITY	29	0.820488	0.740046	0.922885
GO_POSITIVE_REGULATION_OF_PROTEIN_DEACETYLATION	17	0.819816	0.716922	0.92354
REACTOME_ACTIVATED_TLR4_SIGNALLING	86	0.819631	0.841128	0.923293
GO_NEGATIVE_REGULATION_OF_PROTEIN_COMPLEX_DISASSEMBLY	133	0.819203	0.888772	0.923484
GO_REGULATION_OF_MICROTUBULE_POLYMERIZATION	27	0.818261	0.746766	0.924627
REACTOME_CELL_CELL_COMMUNICATION	69	0.81815	0.820388	0.924239
GO_RESPONSE_TO_X_RAY	26	0.817615	0.741863	0.924628
GO_REGULATION_OF_MESENCHYMAL_CELL_PROLIFERATION	18	0.81722	0.720328	0.924765
GO_PORPHYRIN_CONTAINING_COMPOUND_METABOLIC_PROCESS	29	0.816938	0.745618	0.924681
GO_POSITIVE_REGULATION_OF_NUCLEAR_DIVISION	42	0.816386	0.775346	0.92507
GO_POSITIVE_REGULATION_OF_EPITHELIAL_TO_MESENCHYMAL_TRANSITION	23	0.816034	0.731697	0.925111
GO_BRAIN_MORPHOGENESIS	19	0.815664	0.726513	0.92518
REACTOME_POST_NMDA_RECEPTOR_ACTIVATION_EVENTS	21	0.815373	0.730744	0.92511
GO_REGULATION_OF_SYSTEMIC_ARTERIAL_BLOOD_PRESSURE	35	0.815177	0.763271	0.924873
GO_LONG_CHAIN_FATTY_ACID_METABOLIC_PROCESS	51	0.813522	0.803643	0.92721
REACTOME_REGULATION_OF_INSULIN_SECRETION	51	0.813318	0.802748	0.926979
GO_ENDOTHELIAL_CELL_DIFFERENTIATION	52	0.812933	0.794553	0.927065
REACTOME_ACTIVATION_OF_NMDA_RECEPTOR_UPON_GLUTAMATE_BINDING_AND_POSTSYNAPTIC_EVENTS	21	0.812379	0.733541	0.927471
GO_ANTIGEN_PROCESSING_AND_PRESENTATION_OF_ENDOGENOUS_ANTIGEN	15	0.812365	0.717688	0.926912
GO_CELL_SUBSTRATE_JUNCTION_ASSEMBLY	26	0.812129	0.740741	0.926748
GO_RESPONSE_TO_CAMP	64	0.81211	0.816766	0.926196
GO_MEMBRANE_LIPID_METABOLIC_PROCESS	138	0.811788	0.897124	0.926185
GO_POSITIVE_REGULATION_OF_CALCIUM_ION_TRANSMEMBRANE_TRANSPORT	32	0.811453	0.768136	0.926198
GO_RESPONSE_TO_AMMONIUM_ION	28	0.811386	0.756114	0.92573
GO_POSITIVE_REGULATION_OF_CELLULAR_AMIDE_METABOLIC_PROCESS	89	0.810885	0.861576	0.926032
GO_DSRNA_FRAGMENTATION	15	0.810309	0.713512	0.926457
GO_POSITIVE_REGULATION_OF_NEURON_APOPTOTIC_PROCESS	37	0.80991	0.773798	0.926546
GO_REGULATION_OF_CARBOHYDRATE_METABOLIC_PROCESS	117	0.809352	0.890293	0.926929
GO_TRANSCRIPTION_FROM_RNA_POLYMERASE_I_PROMOTER	33	0.808536	0.77661	0.927763
GO_REGULATION_OF_VIRAL_RELEASE_FROM_HOST_CELL	26	0.808321	0.759785	0.927547
GO_RESPONSE_TO_INTERFERON_BETA	21	0.80811	0.734259	0.92732
GO_ATP_GENERATION_FROM_ADP	27	0.807656	0.762089	0.927526
GO_ADENYLATE_CYCLASE_ACTIVATING_G_PROTEIN_COUPLED_RECEPTOR_SIGNALING_PATHWAY	25	0.807265	0.758339	0.927617
GO_SYNAPTIC_TRANSMISSION_GLUTAMATERGIC	15	0.805864	0.731072	0.92942
GO_REGULATION_OF_ALCOHOL_BIOSYNTHETIC_PROCESS	30	0.805373	0.759752	0.92967
GO_AUTONOMIC_NERVOUS_SYSTEM_DEVELOPMENT	19	0.805156	0.739503	0.929448
GO_NEGATIVE_REGULATION_OF_SMOOTHENED_SIGNALING_PATHWAY	17	0.804444	0.742279	0.930075
GO_POSITIVE_REGULATION_OF_OSTEOCLAST_DIFFERENTIATION	16	0.804336	0.728617	0.929677
GO_POSITIVE_REGULATION_OF_CANONICAL_WNT_SIGNALING_PATHWAY	93	0.8035	0.874294	0.930494
GO_PROTEIN_LOCALIZATION_TO_CHROMOSOME	35	0.802745	0.77516	0.931167
GO_REGULATION_OF_SULFUR_METABOLIC_PROCESS	18	0.802457	0.753162	0.931062
REACTOME_NUCLEAR_EVENTS_KINASE_AND_TRANSCRIPTION_FACTOR_ACTIVATION	24	0.800897	0.770632	0.933058
GO_REGULATION_OF_THE_FORCE_OF_HEART_CONTRACTION	15	0.800196	0.736453	0.933645
GO_NAD_METABOLIC_PROCESS	44	0.799594	0.804935	0.934069
GO_CELL_PROLIFERATION_IN_FOREBRAIN	15	0.798712	0.729117	0.934917
GO_EMBRYONIC_PATTERN_SPECIFICATION	28	0.798557	0.770104	0.934592
GO_ENDOTHELIAL_CELL_PROLIFERATION	15	0.798435	0.743255	0.934214
GO_HEAD_MORPHOGENESIS	24	0.798335	0.765063	0.933794
REACTOME_FATTY_ACID_TRIACYLGLYCEROL_AND_KETONE_BODY_METABOLISM	137	0.797794	0.926913	0.934096
GO_SPINDLE_LOCALIZATION	31	0.797567	0.775244	0.933883
GO_MACROMITOPHAGY	93	0.79754	0.881136	0.933354
GO_REGULATION_OF_MEMBRANE_DEPOLARIZATION	25	0.79747	0.759991	0.932883
GO_MUSCLE_CONTRACTION	124	0.797346	0.91009	0.9325
GO_PROTEIN_UBIQUITINATION_INVOLVED_IN_UBIQUITIN_DEPENDENT_PROTEIN_CATABOLIC_PROCESS	112	0.797252	0.906123	0.932074
GO_NEGATIVE_REGULATION_OF_CARBOHYDRATE_METABOLIC_PROCESS	30	0.796792	0.777726	0.932228
GO_NEGATIVE_REGULATION_OF_BMP_SIGNALING_PATHWAY	26	0.796609	0.771838	0.931945
GO_REGULATION_OF_ENDOPLASMIC_RETICULUM_UNFOLDED_PROTEIN_RESPONSE	26	0.79636	0.781428	0.931765
GO_LIMBIC_SYSTEM_DEVELOPMENT	47	0.795724	0.820906	0.932201
GO_PHOSPHATIDYLINOSITOL_BIOSYNTHETIC_PROCESS	96	0.795497	0.893825	0.931991
GO_REGULATION_OF_INTERFERON_BETA_PRODUCTION	42	0.79442	0.811995	0.933135
GO_CHONDROITIN_SULFATE_BIOSYNTHETIC_PROCESS	16	0.79406	0.754596	0.933134
GO_VENTRICULAR_SEPTUM_DEVELOPMENT	31	0.793685	0.786944	0.933149
GO_NEGATIVE_REGULATION_OF_EPITHELIAL_CELL_APOPTOTIC_PROCESS	15	0.79191	0.743973	0.935362
GO_SPERMATID_DIFFERENTIATION	70	0.791807	0.85704	0.934939
GO_POSITIVE_REGULATION_OF_CELL_KILLING	29	0.790907	0.786225	0.935752
GO_ORGANIC_HYDROXY_COMPOUND_BIOSYNTHETIC_PROCESS	108	0.790876	0.906069	0.935225
GO_NEGATIVE_REGULATION_OF_GTPASE_ACTIVITY	32	0.790495	0.799007	0.935232
GO_CERAMIDE_METABOLIC_PROCESS	53	0.78948	0.847877	0.936246
GO_POSITIVE_REGULATION_OF_TRANSCRIPTION_FROM_RNA_POLYMERASE_II_PROMOTER_INVOLVED_IN_CELLULAR_RESPONSE_TO_CHEMICAL_STIMULUS	20	0.789433	0.763176	0.935745
GO_ENDOTHELIAL_CELL_DEVELOPMENT	37	0.789291	0.812142	0.935387
GO_ACTOMYOSIN_STRUCTURE_ORGANIZATION	43	0.789134	0.833676	0.935056
GO_MAINTENANCE_OF_LOCATION	110	0.787733	0.917626	0.936625
GO_REGULATION_OF_MUSCLE_ADAPTATION	41	0.787323	0.823529	0.93669
GO_REACTIVE_OXYGEN_SPECIES_METABOLIC_PROCESS	64	0.786259	0.853402	0.937723
GO_POSITIVE_REGULATION_OF_WNT_SIGNALING_PATHWAY	116	0.785991	0.922245	0.937549
GO_ORGANOPHOSPHATE_CATABOLIC_PROCESS	83	0.785888	0.886806	0.937129
GO_AMINO_ACID_TRANSMEMBRANE_TRANSPORT	39	0.785182	0.822692	0.937628
REACTOME_CHONDROITIN_SULFATE_DERMATAN_SULFATE_METABOLISM	35	0.784475	0.808642	0.938102
GO_TELOMERE_ORGANIZATION	82	0.783412	0.892508	0.939086
GO_CELLULAR_RESPONSE_TO_STARVATION	91	0.783009	0.895311	0.939129
GO_MYOBLAST_DIFFERENTIATION	23	0.781539	0.785394	0.940754
GO_REGULATION_OF_CHROMOSOME_SEGREGATION	68	0.781483	0.882898	0.940263
REACTOME_PPARA_ACTIVATES_GENE_EXPRESSION	79	0.780904	0.884625	0.940535
GO_RESPONSE_TO_RETINOIC_ACID	65	0.780673	0.877243	0.940297
GO_NEGATIVE_REGULATION_OF_ADAPTIVE_IMMUNE_RESPONSE	23	0.780223	0.782167	0.940395
GO_ETHANOLAMINE_CONTAINING_COMPOUND_METABOLIC_PROCESS	54	0.779976	0.857821	0.940183
GO_STRESS_ACTIVATED_PROTEIN_KINASE_SIGNALING_CASCADE	86	0.779862	0.900449	0.939771
REACTOME_PROLONGED_ERK_ACTIVATION_EVENTS	16	0.778186	0.773711	0.941606
GO_REGULATION_OF_ACTIN_NUCLEATION	24	0.778136	0.795701	0.941109
GO_POSITIVE_REGULATION_OF_DNA_BIOSYNTHETIC_PROCESS	49	0.777656	0.853514	0.941229
GO_POSITIVE_REGULATION_OF_PROTEIN_CATABOLIC_PROCESS	224	0.775108	0.981358	0.944291
GO_PRODUCTION_OF_MOLECULAR_MEDIATOR_OF_IMMUNE_RESPONSE	43	0.773571	0.837869	0.945897
GO_POSITIVE_REGULATION_OF_RELEASE_OF_SEQUESTERED_CALCIUM_ION_INTO_CYTOSOL	20	0.773525	0.797635	0.945389
GO_METALLO_SULFUR_CLUSTER_ASSEMBLY	18	0.771164	0.774193	0.948092
GO_POSITIVE_REGULATION_OF_PEPTIDYL_THREONINE_PHOSPHORYLATION	17	0.770506	0.78198	0.948424
GO_POSITIVE_REGULATION_OF_RECEPTOR_ACTIVITY	28	0.770366	0.816834	0.948042
GO_CELLULAR_RESPONSE_TO_TOPOLOGICALLY_INCORRECT_PROTEIN	107	0.769662	0.92754	0.948442
GO_RENAL_WATER_HOMEOSTASIS	16	0.76886	0.780253	0.948963
GO_POSITIVE_REGULATION_OF_DENDRITE_MORPHOGENESIS	24	0.767573	0.801616	0.950106
GO_THYMUS_DEVELOPMENT	32	0.767538	0.82395	0.949583
REACTOME_DESTABILIZATION_OF_MRNA_BY_TRISTETRAPROLIN_TTP	17	0.767112	0.792018	0.949581
REACTOME_DESTABILIZATION_OF_MRNA_BY_BRF1	17	0.764999	0.792289	0.951845
GO_GENERATION_OF_PRECURSOR_METABOLITES_AND_ENERGY	234	0.764742	0.987935	0.951622
REACTOME_NETRIN1_SIGNALING	23	0.763813	0.812835	0.95229
GO_REGULATION_OF_PROTEIN_DEACETYLATION	30	0.763691	0.827718	0.951878
REACTOME_ERK_MAPK_TARGETS	21	0.762574	0.814068	0.952777
GO_REGULATION_OF_PEPTIDYL_SERINE_PHOSPHORYLATION	76	0.76255	0.90799	0.952239
GO_REGULATION_OF_GENERATION_OF_PRECURSOR_METABOLITES_AND_ENERGY	67	0.762293	0.899017	0.952001
REACTOME_GLUCONEOGENESIS	25	0.761985	0.81484	0.95183
GO_RETINA_MORPHOGENESIS_IN_CAMERA_TYPE_EYE	16	0.761801	0.788956	0.951501
GO_ADHERENS_JUNCTION_ASSEMBLY	24	0.761721	0.819739	0.951034
GO_POSTSYNAPTIC_MEMBRANE_ORGANIZATION	16	0.761257	0.781264	0.951067
GO_CARDIAC_SEPTUM_DEVELOPMENT	49	0.760706	0.879935	0.951212
GO_CELLULAR_RESPIRATION	129	0.760258	0.956899	0.951211
GO_PHOSPHOLIPID_DEPHOSPHORYLATION	24	0.759922	0.821069	0.95107
GO_RRNA_TRANSCRIPTION	17	0.758497	0.80009	0.952283
GO_ASPARTATE_FAMILY_AMINO_ACID_METABOLIC_PROCESS	44	0.757062	0.872125	0.953531
REACTOME_RIP_MEDIATED_NFKB_ACTIVATION_VIA_DAI	16	0.755711	0.801022	0.954678
GO_ENERGY_DERIVATION_BY_OXIDATION_OF_ORGANIC_COMPOUNDS	182	0.75538	0.978172	0.954516
GO_AEROBIC_RESPIRATION	47	0.75262	0.879298	0.95732
GO_REGULATION_OF_SYNAPTIC_VESICLE_TRANSPORT	23	0.751891	0.824652	0.957651
GO_POSITIVE_REGULATION_OF_BLOOD_CIRCULATION	39	0.7506	0.861845	0.958645
GO_ENDOTHELIUM_DEVELOPMENT	61	0.748926	0.90879	0.960076
GO_CELLULAR_MONOVALENT_INORGANIC_CATION_HOMEOSTASIS	64	0.748161	0.913179	0.960413
GO_CHONDROITIN_SULFATE_PROTEOGLYCAN_BIOSYNTHETIC_PROCESS	19	0.747451	0.809854	0.960678
GO_NEGATIVE_REGULATION_OF_ACTIN_FILAMENT_POLYMERIZATION	31	0.747063	0.856687	0.960573
GO_REGULATION_OF_RECEPTOR_INTERNALIZATION	22	0.746283	0.832105	0.960912
GO_RESPONSE_TO_PURINE_CONTAINING_COMPOUND	102	0.745556	0.952165	0.961187
GO_CARDIAC_SEPTUM_MORPHOGENESIS	25	0.744112	0.836066	0.962289
GO_POSITIVE_REGULATION_OF_MUSCLE_HYPERTROPHY	16	0.741795	0.811222	0.964382
GO_CELL_KILLING	34	0.73816	0.871432	0.967891
GO_NUCLEOPHAGY	16	0.737636	0.816734	0.967902
GO_REGULATION_OF_MUSCLE_TISSUE_DEVELOPMENT	50	0.737428	0.899074	0.967566
GO_CYTOSOLIC_TRANSPORT	154	0.737088	0.983146	0.967375
GO_POSITIVE_REGULATION_OF_TOR_SIGNALING	25	0.736767	0.85036	0.967171
GO_REGULATION_OF_EXOSOMAL_SECRETION	16	0.733431	0.829839	0.970233
GO_MACROPHAGE_ACTIVATION	25	0.732872	0.850023	0.970249
GO_CELLULAR_RESPONSE_TO_VIRUS	19	0.732684	0.832816	0.969877
GO_GLYCEROLIPID_CATABOLIC_PROCESS	19	0.732117	0.835373	0.969911
GO_PROTEIN_LOCALIZATION_TO_CELL_PERIPHERY	110	0.732078	0.964159	0.969383
GO_REGULATION_OF_GLIAL_CELL_DIFFERENTIATION	33	0.730908	0.870213	0.970045
GO_MITOCHONDRIAL_ELECTRON_TRANSPORT_CYTOCHROME_C_TO_OXYGEN	15	0.730844	0.822179	0.96954
GO_REGULATION_OF_EPITHELIAL_CELL_APOPTOTIC_PROCESS	31	0.728103	0.87981	0.971837
GO_REGULATION_OF_TRIGLYCERIDE_METABOLIC_PROCESS	23	0.727487	0.848724	0.971896
GO_REGULATION_OF_HISTONE_DEACETYLATION	21	0.726974	0.853402	0.97185
GO_REGULATION_OF_MEIOTIC_NUCLEAR_DIVISION	17	0.726424	0.835982	0.971863
REACTOME_POST_TRANSLATIONAL_MODIFICATION_SYNTHESIS_OF_GPI_ANCHORED_PROTEINS	24	0.726205	0.858172	0.971518
GO_NUCLEOBASE_CONTAINING_SMALL_MOLECULE_INTERCONVERSION	19	0.724065	0.846751	0.973117
GO_ALDITOL_METABOLIC_PROCESS	15	0.72345	0.83524	0.973177
GO_ESTABLISHMENT_OR_MAINTENANCE_OF_BIPOLAR_CELL_POLARITY	24	0.720651	0.865393	0.975353
GO_REGULATION_OF_VOLTAGE_GATED_CALCIUM_CHANNEL_ACTIVITY	15	0.720095	0.841032	0.975338
GO_SPLEEN_DEVELOPMENT	26	0.719821	0.862404	0.975032
GO_REGULATION_OF_POSTSYNAPTIC_MEMBRANE_POTENTIAL	26	0.717661	0.875914	0.976537
GO_MORPHOGENESIS_OF_A_POLARIZED_EPITHELIUM	17	0.715178	0.849934	0.978334
GO_LIPOPROTEIN_METABOLIC_PROCESS	99	0.714054	0.975919	0.978812
GO_REGULATION_OF_SISTER_CHROMATID_COHESION	16	0.71374	0.850471	0.978531
GO_ALDITOL_PHOSPHATE_METABOLIC_PROCESS	23	0.71283	0.877275	0.978805
GO_N_GLYCAN_PROCESSING	17	0.712695	0.84784	0.978365
GO_NEGATIVE_REGULATION_OF_GLIOGENESIS	18	0.712008	0.856861	0.978427
GO_LUNG_EPITHELIUM_DEVELOPMENT	17	0.708356	0.853283	0.981172
GO_GLUCAN_METABOLIC_PROCESS	44	0.70834	0.926135	0.980617
GO_REGULATION_OF_ENDOPLASMIC_RETICULUM_STRESS_INDUCED_INTRINSIC_APOPTOTIC_SIGNALING_PATHWAY	27	0.708015	0.887144	0.98033
GO_REGULATION_OF_CARDIAC_CONDUCTION	38	0.704991	0.912329	0.982389
GO_G2_DNA_DAMAGE_CHECKPOINT	29	0.704364	0.895634	0.982352
REACTOME_TRANSCRIPTIONAL_REGULATION_OF_WHITE_ADIPOCYTE_DIFFERENTIATION	58	0.704167	0.955488	0.981951
GO_CELLULAR_RESPONSE_TO_INSULIN_STIMULUS	109	0.702318	0.983994	0.98298
GO_NUCLEOBASE_BIOSYNTHETIC_PROCESS	16	0.702266	0.860872	0.982456
GO_POSITIVE_REGULATION_OF_INTERFERON_BETA_PRODUCTION	29	0.701855	0.896583	0.98224
GO_MODULATION_BY_SYMBIONT_OF_HOST_CELLULAR_PROCESS	26	0.70172	0.890749	0.981787
REACTOME_SYNTHESIS_AND_INTERCONVERSION_OF_NUCLEOTIDE_DI_AND_TRIPHOSPHATES	17	0.697345	0.870488	0.984856
GO_NEGATIVE_REGULATION_OF_DNA_METABOLIC_PROCESS	92	0.697243	0.980597	0.984374
GO_SULFUR_COMPOUND_CATABOLIC_PROCESS	22	0.697162	0.878985	0.983871
GO_TRNA_MODIFICATION	55	0.695249	0.946325	0.984863
GO_SULFUR_AMINO_ACID_METABOLIC_PROCESS	32	0.693924	0.910615	0.985338
GO_RESPONSE_TO_MONOAMINE	26	0.692195	0.902831	0.986144
GO_POSITIVE_REGULATION_OF_INTERFERON_ALPHA_PRODUCTION	16	0.691066	0.870523	0.986464
GO_ACTIVATION_OF_MAPKK_ACTIVITY	36	0.690979	0.924572	0.985965
REACTOME_TAK1_ACTIVATES_NFKB_BY_PHOSPHORYLATION_AND_ACTIVATION_OF_IKKS_COMPLEX	21	0.689854	0.892011	0.986259
GO_PROTEIN_DESTABILIZATION	31	0.689234	0.913193	0.986168
REACTOME_REGULATION_OF_SIGNALING_BY_CBL	17	0.688386	0.876173	0.986259
GO_NEGATIVE_REGULATION_OF_CELL_KILLING	15	0.68621	0.869904	0.987336
GO_PYRIDINE_CONTAINING_COMPOUND_BIOSYNTHETIC_PROCESS	16	0.686196	0.871586	0.986781
GO_SIGNAL_PEPTIDE_PROCESSING	16	0.68575	0.876835	0.986547
GO_CHROMOSOME_LOCALIZATION	51	0.683758	0.949706	0.987428
REACTOME_CREB_PHOSPHORYLATION_THROUGH_THE_ACTIVATION_OF_RAS	19	0.683266	0.892649	0.987219
GO_MUSCLE_ADAPTATION	16	0.675514	0.883868	0.992121
GO_RESPONSE_TO_LEAD_ION	15	0.672384	0.879153	0.993652
GO_REGULATION_OF_AUTOPHAGOSOME_ASSEMBLY	34	0.671832	0.935402	0.993447
GO_MEMBRANE_PROTEIN_PROTEOLYSIS	30	0.671048	0.928342	0.993398
REACTOME_FRS2_MEDIATED_CASCADE	17	0.670257	0.889971	0.993354
GO_REGULATION_OF_FATTY_ACID_OXIDATION	20	0.670215	0.915113	0.992814
GO_INTRASPECIES_INTERACTION_BETWEEN_ORGANISMS	27	0.669948	0.929345	0.992419
GO_MISFOLDED_OR_INCOMPLETELY_SYNTHESIZED_PROTEIN_CATABOLIC_PROCESS	16	0.665524	0.894957	0.994671
REACTOME_IRON_UPTAKE_AND_TRANSPORT	29	0.664177	0.935337	0.994936
GO_NUCLEAR_IMPORT	111	0.659586	0.995686	0.997119
GO_CELLULAR_METABOLIC_COMPOUND_SALVAGE	33	0.659049	0.951587	0.996871
GO_REGULATION_OF_HEART_RATE_BY_CARDIAC_CONDUCTION	16	0.657832	0.900589	0.997004
REACTOME_CITRIC_ACID_CYCLE_TCA_CYCLE	19	0.657699	0.914126	0.996513
GO_NEGATIVE_REGULATION_OF_LYMPHOCYTE_MEDIATED_IMMUNITY	27	0.657342	0.937976	0.996157
GO_PLASMA_MEMBRANE_FUSION	16	0.65657	0.905787	0.996044
GO_POSITIVE_REGULATION_OF_SYNAPTIC_TRANSMISSION	56	0.655621	0.976276	0.996024
GO_MITOCHONDRION_MORPHOGENESIS	18	0.655571	0.915537	0.99549
GO_SULFUR_COMPOUND_TRANSPORT	20	0.655391	0.921408	0.995023
REACTOME_SIGNALING_BY_HIPPO	15	0.655266	0.908617	0.994529
GO_PROTEIN_LIPID_COMPLEX_SUBUNIT_ORGANIZATION	21	0.654386	0.923378	0.994468
GO_GLUCOSE_CATABOLIC_PROCESS	22	0.652843	0.924664	0.994785
GO_PYRIMIDINE_NUCLEOBASE_METABOLIC_PROCESS	18	0.652788	0.909011	0.994255
GO_HEME_BIOSYNTHETIC_PROCESS	19	0.652443	0.912786	0.993879
GO_REGULATION_OF_AUTOPHAGY	225	0.651847	1	0.993651
GO_GLIAL_CELL_MIGRATION	24	0.649951	0.935607	0.99413
GO_BROWN_FAT_CELL_DIFFERENTIATION	17	0.646491	0.910718	0.995388
GO_POSITIVE_REGULATION_OF_TELOMERASE_ACTIVITY	21	0.644683	0.930527	0.995752
GO_ADP_METABOLIC_PROCESS	35	0.643897	0.95663	0.995585
GO_POSITIVE_REGULATION_OF_RESPONSE_TO_EXTRACELLULAR_STIMULUS	42	0.640694	0.970867	0.996634
GO_BASE_EXCISION_REPAIR	35	0.64026	0.957933	0.996283
GO_PHOSPHOLIPID_TRANSPORT	41	0.639674	0.971639	0.996005
REACTOME_RESPIRATORY_ELECTRON_TRANSPORT	63	0.639069	0.98541	0.995736
GO_PROTEIN_LOCALIZATION_TO_VACUOLE	41	0.638587	0.969318	0.995412
GO_REGULATION_OF_PROTEIN_TARGETING_TO_MITOCHONDRION	77	0.637818	0.991636	0.99523
GO_PROTEIN_TRANSPORT_ALONG_MICROTUBULE	23	0.635728	0.944285	0.995675
GO_NUCLEOTIDE_PHOSPHORYLATION	43	0.635191	0.979026	0.995372
GO_REGULATION_OF_GLYCOGEN_METABOLIC_PROCESS	26	0.630916	0.949775	0.996755
GO_REGULATION_OF_GLUCONEOGENESIS	26	0.630004	0.956972	0.996604
GO_REGULATION_OF_POTASSIUM_ION_TRANSMEMBRANE_TRANSPORTER_ACTIVITY	23	0.627557	0.944482	0.997111
GO_REGULATION_OF_NIK_NF_KAPPAB_SIGNALING	38	0.626156	0.971731	0.99715
GO_REGULATION_OF_SISTER_CHROMATID_SEGREGATION	55	0.625875	0.984816	0.996711
GO_POSTTRANSCRIPTIONAL_GENE_SILENCING	33	0.624896	0.966125	0.99657
REACTOME_MYD88_MAL_CASCADE_INITIATED_ON_PLASMA_MEMBRANE	76	0.622632	0.994321	0.996964
GO_ACTIN_NUCLEATION	19	0.621776	0.942482	0.996759
GO_CERAMIDE_BIOSYNTHETIC_PROCESS	28	0.616836	0.96704	0.998171
GO_NEGATIVE_REGULATION_OF_PROTEIN_LOCALIZATION_TO_CELL_PERIPHERY	16	0.616179	0.940072	0.997871
GO_REGULATION_OF_VACUOLE_ORGANIZATION	41	0.61481	0.981355	0.997831
GO_REGULATION_OF_STRIATED_MUSCLE_CONTRACTION	40	0.613513	0.97515	0.997765
REACTOME_ACTIVATED_AMPK_STIMULATES_FATTY_ACID_OXIDATION_IN_MUSCLE	16	0.610216	0.938675	0.998432
GO_CELL_DIFFERENTIATION_INVOLVED_IN_EMBRYONIC_PLACENTA_DEVELOPMENT	15	0.610076	0.932631	0.997927
GO_POSITIVE_REGULATION_OF_CYTOKINESIS	21	0.607344	0.953874	0.998359
GO_REGULATION_OF_TELOMERE_CAPPING	16	0.606611	0.936434	0.998068
GO_CHROMATIN_SILENCING_AT_RDNA	21	0.601262	0.960186	0.999331
GO_STEM_CELL_DIVISION	17	0.598823	0.948165	0.999566
GO_ELECTRON_TRANSPORT_CHAIN	89	0.598735	0.998016	0.999039
REACTOME_MYOGENESIS	16	0.596812	0.948673	0.999093
GO_REGULATION_OF_ORGAN_GROWTH	41	0.594524	0.989652	0.999248
GO_PYRIMIDINE_RIBONUCLEOTIDE_METABOLIC_PROCESS	18	0.593225	0.956371	0.99909
GO_PROTEIN_REFOLDING	19	0.592504	0.958756	0.998752
GO_RESPONSE_TO_GLUCAGON	27	0.592452	0.970575	0.998215
GO_RESPONSE_TO_AMINE	30	0.588474	0.982176	0.998829
REACTOME_GLYCOLYSIS	22	0.585612	0.966951	0.999072
REACTOME_ACTIVATION_OF_CHAPERONE_GENES_BY_XBP1S	44	0.585306	0.989588	0.998603
GO_REGULATION_OF_RESPONSE_TO_EXTRACELLULAR_STIMULUS	155	0.584218	1	0.998356
REACTOME_PYRUVATE_METABOLISM	17	0.583658	0.960625	0.997954
GO_SOMATIC_DIVERSIFICATION_OF_IMMUNOGLOBULINS	22	0.580823	0.974353	0.998161
REACTOME_PRE_NOTCH_PROCESSING_IN_GOLGI	16	0.580187	0.95812	0.997776
GO_CELLULAR_SENESCENCE	27	0.578316	0.979858	0.997701
GO_RETROGRADE_TRANSPORT_ENDOSOME_TO_GOLGI	62	0.574908	0.996437	0.998004
GO_MODULATION_OF_EXCITATORY_POSTSYNAPTIC_POTENTIAL	16	0.572174	0.962289	0.998122
REACTOME_L1CAM_INTERACTIONS	58	0.570711	0.997176	0.997914
GO_NEGATIVE_REGULATION_OF_SMALL_GTPASE_MEDIATED_SIGNAL_TRANSDUCTION	31	0.570425	0.982896	0.997432
REACTOME_RESPIRATORY_ELECTRON_TRANSPORT_ATP_SYNTHESIS_BY_CHEMIOSMOTIC_COUPLING_AND_HEAT_PRODUCTION_BY_UNCOUPLING_PROTEINS_	78	0.568708	0.999261	0.997275
REACTOME_TRAF6_MEDIATED_INDUCTION_OF_NFKB_AND_MAP_KINASES_UPON_TLR7_8_OR_9_ACTIVATION	70	0.566782	0.997805	0.997162
GO_REGULATION_OF_TOR_SIGNALING	56	0.564409	0.996664	0.997136
GO_REGULATION_OF_ALPHA_BETA_T_CELL_PROLIFERATION	20	0.56019	0.977723	0.997478
GO_CHOLESTEROL_EFFLUX	16	0.558298	0.968778	0.997309
GO_NEGATIVE_REGULATION_OF_NUCLEOTIDE_METABOLIC_PROCESS	31	0.555803	0.9896	0.997251
GO_NATURAL_KILLER_CELL_MEDIATED_IMMUNITY	17	0.554725	0.967658	0.996912
GO_REGULATION_OF_TELOMERE_MAINTENANCE_VIA_TELOMERE_LENGTHENING	45	0.547902	0.996039	0.997614
GO_BONE_CELL_DEVELOPMENT	18	0.546435	0.978495	0.997308
GO_REGULATION_OF_SYNAPTIC_TRANSMISSION_GLUTAMATERGIC	16	0.544919	0.97131	0.997025
GO_REGULATION_OF_OXIDATIVE_STRESS_INDUCED_INTRINSIC_APOPTOTIC_SIGNALING_PATHWAY	24	0.541495	0.987624	0.997054
REACTOME_ACTIVATED_NOTCH1_TRANSMITS_SIGNAL_TO_THE_NUCLEUS	22	0.535416	0.984197	0.997467
GO_NUCLEOSIDE_BISPHOSPHATE_BIOSYNTHETIC_PROCESS	16	0.530206	0.977797	0.997672
GO_NOTCH_RECEPTOR_PROCESSING	15	0.520457	0.981199	0.998402
GO_REGULATION_OF_HEART_GROWTH	20	0.518537	0.985411	0.998083
GO_LABYRINTHINE_LAYER_DEVELOPMENT	29	0.518166	0.992099	0.997585
GO_REGULATION_OF_MEMBRANE_REPOLARIZATION	17	0.506376	0.987199	0.998319
GO_SPLICEOSOMAL_SNRNP_ASSEMBLY	35	0.499135	0.997161	0.998456
GO_REGULATION_OF_COFACTOR_METABOLIC_PROCESS	38	0.480304	0.999306	0.999343
GO_ANTEROGRADE_AXONAL_TRANSPORT	17	0.4784	0.993647	0.998924
GO_2_OXOGLUTARATE_METABOLIC_PROCESS	17	0.470077	0.995986	0.99886
GO_NUCLEAR_ENVELOPE_REASSEMBLY	17	0.434514	0.997395	0.999681
GO_INTERMEDIATE_FILAMENT_BASED_PROCESS	20	0.425453	0.998889	0.99934

## Sheet: CD74-low-enriched pathways
Table S4B: gene set enrichment analysis (GSEA) of genes showing higher expression in CD74low compared to CD74high monocytes
The table shows the number of genes (SIZE), the normalized enrichment score (NES), pValue (NOM p-val) and FDR (FDR q-val) for each pathway
NAME	SIZE	NES	NOM p-val	FDR q-val
REACTOME_RNA_POL_II_PRE_TRANSCRIPTION_EVENTS	51	-2.05374	0	0.0742129
REACTOME_LATE_PHASE_OF_HIV_LIFE_CYCLE	92	-1.97441	0	0.13422
REACTOME_RNA_POL_II_TRANSCRIPTION_PRE_INITIATION_AND_PROMOTER_OPENING	37	-1.97175	0.000174429	0.092375
REACTOME_G1_PHASE	35	-1.93507	0.000350018	0.1156
REACTOME_HIV_LIFE_CYCLE	104	-1.90805	0	0.13492
GO_PROTEIN_EXPORT_FROM_NUCLEUS	27	-1.87463	0.00179147	0.173945
REACTOME_FORMATION_OF_RNA_POL_II_ELONGATION_COMPLEX_	35	-1.86961	0.00124444	0.158659
REACTOME_RNA_POL_II_TRANSCRIPTION	93	-1.82412	0.000334672	0.242239
REACTOME_ELONGATION_ARREST_AND_RECOVERY	25	-1.8059	0.00270954	0.266627
REACTOME_INFLUENZA_LIFE_CYCLE	129	-1.80074	0	0.254454
REACTOME_FORMATION_OF_THE_HIV1_EARLY_ELONGATION_COMPLEX	26	-1.79965	0.00408889	0.234119
REACTOME_ABORTIVE_ELONGATION_OF_HIV1_TRANSCRIPT_IN_THE_ABSENCE_OF_TAT	18	-1.79032	0.00385321	0.238503
GO_RNA_CATABOLIC_PROCESS	207	-1.78932	0	0.222622
GO_ATP_HYDROLYSIS_COUPLED_TRANSMEMBRANE_TRANSPORT	29	-1.78286	0.00251799	0.222356
GO_TRANSCRIPTION_ELONGATION_FROM_RNA_POLYMERASE_II_PROMOTER	70	-1.76368	0.00154242	0.255852
GO_HISTONE_H3_K4_METHYLATION	25	-1.74657	0.00433761	0.287936
GO_SNRNA_METABOLIC_PROCESS	74	-1.74064	0.00101919	0.288612
REACTOME_INFLUENZA_VIRAL_RNA_TRANSCRIPTION_AND_REPLICATION	95	-1.73377	0.000503778	0.292993
REACTOME_NUCLEOTIDE_EXCISION_REPAIR	46	-1.722	0.00264644	0.312621
REACTOME_MRNA_CAPPING	26	-1.72189	0.00837429	0.297336
GO_G1_DNA_DAMAGE_CHECKPOINT	67	-1.70761	0.00187202	0.326522
GO_PROTEIN_K63_LINKED_DEUBIQUITINATION	21	-1.69602	0.00959233	0.348035
GO_POSITIVE_REGULATION_OF_DNA_REPAIR	33	-1.67591	0.0100317	0.403837
GO_NCRNA_TRANSCRIPTION	80	-1.67564	0.00303286	0.387905
GO_POSITIVE_REGULATION_OF_CELL_CYCLE_ARREST	75	-1.67035	0.00340599	0.391012
REACTOME_FORMATION_OF_TRANSCRIPTION_COUPLED_NER_TC_NER_REPAIR_COMPLEX	26	-1.66904	0.0118855	0.380406
GO_NEGATIVE_REGULATION_OF_RELEASE_OF_CYTOCHROME_C_FROM_MITOCHONDRIA	15	-1.6639	0.015873	0.384289
REACTOME_TRANSCRIPTION_COUPLED_NER_TC_NER	41	-1.64524	0.0110488	0.43866
GO_POSITIVE_REGULATION_OF_PROTEIN_EXPORT_FROM_NUCLEUS	18	-1.64146	0.0154593	0.438102
GO_NUCLEAR_TRANSCRIBED_MRNA_CATABOLIC_PROCESS_DEADENYLATION_DEPENDENT_DECAY	53	-1.64143	0.0078329	0.423588
GO_REGULATION_OF_SODIUM_ION_TRANSMEMBRANE_TRANSPORT	31	-1.63928	0.0135957	0.417759
GO_ENDOPLASMIC_RETICULUM_ORGANIZATION	33	-1.63422	0.011036	0.423361
GO_GOLGI_ORGANIZATION	77	-1.63417	0.00466433	0.410738
GO_REGULATION_OF_ATPASE_ACTIVITY	45	-1.61183	0.0107243	0.4841
GO_RNA_SECONDARY_STRUCTURE_UNWINDING	36	-1.60716	0.0148108	0.489316
GO_GENETIC_IMPRINTING	18	-1.60698	0.0227983	0.476494
GO_FORMATION_OF_TRANSLATION_PREINITIATION_COMPLEX	18	-1.60695	0.0216763	0.463721
GO_PHOTORECEPTOR_CELL_DEVELOPMENT	19	-1.60657	0.0212376	0.45292
GO_CELLULAR_RESPONSE_TO_UV	54	-1.60427	0.00806169	0.449967
GO_DNA_INTEGRITY_CHECKPOINT	129	-1.59797	0.0026251	0.462402
GO_SIGNAL_TRANSDUCTION_BY_P53_CLASS_MEDIATOR	110	-1.59477	0.00312551	0.463488
GO_MRNA_CIS_SPLICING_VIA_SPLICEOSOME	16	-1.5931	0.0270712	0.458771
GO_SINGLE_FERTILIZATION	51	-1.57458	0.0144448	0.521935
GO_HISTONE_MRNA_METABOLIC_PROCESS	28	-1.56424	0.0304659	0.554284
GO_HISTONE_MONOUBIQUITINATION	21	-1.56265	0.0306771	0.548928
GO_EYE_PHOTORECEPTOR_CELL_DIFFERENTIATION	19	-1.55991	0.0290381	0.548873
GO_RIBONUCLEOPROTEIN_COMPLEX_BIOGENESIS	411	-1.55921	0	0.54035
GO_REGULATION_OF_CELL_CYCLE_ARREST	92	-1.5577	0.00727754	0.535552
GO_NEGATIVE_REGULATION_OF_TRANSCRIPTION_FACTOR_IMPORT_INTO_NUCLEUS	36	-1.55748	0.0237182	0.525502
GO_MRNA_SPLICE_SITE_SELECTION	25	-1.55564	0.0274982	0.522543
GO_NUCLEAR_EXPORT	134	-1.55505	0.00310966	0.514534
REACTOME_FORMATION_OF_INCISION_COMPLEX_IN_GG_NER	19	-1.55415	0.0336626	0.508444
REACTOME_APC_CDC20_MEDIATED_DEGRADATION_OF_NEK2A	16	-1.55413	0.033917	0.498914
REACTOME_INTERACTIONS_OF_VPR_WITH_HOST_CELLULAR_PROTEINS	32	-1.55349	0.0260977	0.492187
GO_PROTEIN_MODIFICATION_BY_SMALL_PROTEIN_REMOVAL	101	-1.55154	0.00616769	0.490892
REACTOME_DEADENYLATION_DEPENDENT_MRNA_DECAY	42	-1.54894	0.0204369	0.492002
GO_MICROVILLUS_ORGANIZATION	19	-1.54826	0.0336996	0.485957
GO_NUCLEAR_TRANSCRIBED_MRNA_CATABOLIC_PROCESS_NONSENSE_MEDIATED_DECAY	114	-1.547	0.00739744	0.4825
GO_MITOTIC_DNA_INTEGRITY_CHECKPOINT	89	-1.54658	0.00850567	0.47594
GO_HISTONE_UBIQUITINATION	31	-1.54208	0.0263158	0.484779
GO_ERROR_FREE_TRANSLESION_SYNTHESIS	18	-1.54082	0.0384267	0.481514
REACTOME_HIV_INFECTION	181	-1.53984	0.00175355	0.477301
REACTOME_NONSENSE_MEDIATED_DECAY_ENHANCED_BY_THE_EXON_JUNCTION_COMPLEX	101	-1.53771	0.0088407	0.477443
GO_DNA_TEMPLATED_TRANSCRIPTION_ELONGATION	85	-1.52743	0.0117905	0.508841
GO_NEGATIVE_REGULATION_OF_NF_KAPPAB_IMPORT_INTO_NUCLEUS	16	-1.52351	0.0436689	0.516219
GO_CELLULAR_RESPONSE_TO_TOXIC_SUBSTANCE	16	-1.52316	0.0395491	0.509803
REACTOME_INSULIN_SYNTHESIS_AND_PROCESSING	15	-1.52091	0.0476013	0.510905
GO_NEGATIVE_REGULATION_OF_CELL_CYCLE_G1_S_PHASE_TRANSITION	87	-1.51706	0.0106419	0.518267
GO_RETROGRADE_TRANSPORT_VESICLE_RECYCLING_WITHIN_GOLGI	17	-1.51586	0.0482385	0.515257
GO_CELLULAR_RESPONSE_TO_LIGHT_STIMULUS	62	-1.5106	0.0207476	0.528434
GO_ESTABLISHMENT_OF_MITOTIC_SPINDLE_ORIENTATION	15	-1.50978	0.0490124	0.524214
GO_PROTEIN_MONOUBIQUITINATION	44	-1.50956	0.0254252	0.517766
GO_REGULATION_OF_DNA_REPAIR	62	-1.50738	0.0235434	0.518903
GO_SPERM_EGG_RECOGNITION	22	-1.50416	0.0466125	0.524162
GO_REGULATION_OF_SODIUM_ION_TRANSMEMBRANE_TRANSPORTER_ACTIVITY	24	-1.50237	0.0464286	0.523946
GO_MRNA_3_END_PROCESSING	71	-1.50153	0.0188585	0.520253
REACTOME_REGULATORY_RNA_PATHWAYS	20	-1.49833	0.0491241	0.525807
GO_NUCLEAR_TRANSCRIBED_MRNA_POLY_A_TAIL_SHORTENING	24	-1.49739	0.0430682	0.522729
GO_DORSAL_VENTRAL_PATTERN_FORMATION	36	-1.49368	0.0334501	0.530382
GO_POSITIVE_REGULATION_OF_POTASSIUM_ION_TRANSMEMBRANE_TRANSPORT	15	-1.49297	0.0561839	0.526465
GO_PHOTORECEPTOR_CELL_DIFFERENTIATION	24	-1.49267	0.0454878	0.521162
GO_REGULATION_OF_MRNA_3_END_PROCESSING	25	-1.48939	0.0477987	0.527333
GO_EPITHELIAL_CELL_APOPTOTIC_PROCESS	21	-1.48632	0.0465753	0.532615
GO_POSITIVE_REGULATION_OF_PROTEIN_OLIGOMERIZATION	15	-1.48588	0.060989	0.528003
GO_PEPTIDYL_ASPARAGINE_MODIFICATION	33	-1.48152	0.0436598	0.538504
GO_FIBROBLAST_GROWTH_FACTOR_RECEPTOR_SIGNALING_PATHWAY	55	-1.4744	0.0286413	0.560229
GO_RESPONSE_TO_FIBROBLAST_GROWTH_FACTOR	75	-1.474	0.0231687	0.55539
GO_VIRION_ASSEMBLY	33	-1.47006	0.0415488	0.564651
GO_REGULATION_OF_FATTY_ACID_TRANSPORT	20	-1.47	0.0572409	0.55851
GO_LEUKOCYTE_APOPTOTIC_PROCESS	17	-1.46787	0.0593298	0.560774
REACTOME_CELL_CYCLE_CHECKPOINTS	100	-1.4653	0.0160384	0.564785
REACTOME_TRANSPORT_OF_MATURE_TRANSCRIPT_TO_CYTOPLASM	52	-1.464	0.0325217	0.563767
GO_RIBONUCLEOPROTEIN_COMPLEX_SUBUNIT_ORGANIZATION	178	-1.46328	0.00522814	0.560502
REACTOME_METABOLISM_OF_MRNA	202	-1.45937	0.00499454	0.570082
GO_RNA_3_END_PROCESSING	94	-1.45903	0.0219799	0.565436
GO_NEGATIVE_REGULATION_OF_SIGNAL_TRANSDUCTION_BY_P53_CLASS_MEDIATOR	22	-1.4584	0.0559466	0.561956
REACTOME_FORMATION_OF_THE_TERNARY_COMPLEX_AND_SUBSEQUENTLY_THE_43S_COMPLEX	46	-1.45328	0.0367532	0.576352
GO_POSITIVE_REGULATION_OF_CYCLIN_DEPENDENT_PROTEIN_KINASE_ACTIVITY	27	-1.45296	0.0580278	0.571753
GO_SIGNAL_TRANSDUCTION_IN_RESPONSE_TO_DNA_DAMAGE	88	-1.45193	0.0234545	0.569953
GO_HYALURONAN_METABOLIC_PROCESS	20	-1.4489	0.0658015	0.576414
REACTOME_DNA_REPAIR	98	-1.44831	0.0212014	0.573084
GO_ODONTOGENESIS	54	-1.4424	0.0372157	0.590775
GO_LYMPHOCYTE_APOPTOTIC_PROCESS	15	-1.44183	0.0756071	0.587294
REACTOME_CTNNB1_PHOSPHORYLATION_CASCADE	15	-1.44155	0.0773592	0.582783
GO_MITOTIC_CELL_CYCLE_CHECKPOINT	121	-1.44011	0.0147856	0.582955
GO_ERROR_PRONE_TRANSLESION_SYNTHESIS	19	-1.43805	0.0733042	0.585612
GO_MESODERM_DEVELOPMENT	65	-1.43754	0.032698	0.582173
REACTOME_TRANSPORT_OF_INORGANIC_CATIONS_ANIONS_AND_AMINO_ACIDS_OLIGOPEPTIDES	54	-1.4353	0.0366765	0.585719
REACTOME_APC_C_CDC20_MEDIATED_DEGRADATION_OF_CYCLIN_B	16	-1.43524	0.0768677	0.580523
GO_RIBOSOMAL_SMALL_SUBUNIT_BIOGENESIS	55	-1.43425	0.0384881	0.579207
REACTOME_DEADENYLATION_OF_MRNA	18	-1.43357	0.0685182	0.576705
GO_POSITIVE_REGULATION_OF_DNA_TEMPLATED_TRANSCRIPTION_ELONGATION	21	-1.43031	0.0749453	0.584464
GO_CELL_CYCLE_CHECKPOINT	166	-1.42944	0.012297	0.582745
REACTOME_TRANSPORT_OF_RIBONUCLEOPROTEINS_INTO_THE_HOST_NUCLEUS	27	-1.42863	0.0637011	0.580842
REACTOME_GLOBAL_GENOMIC_NER_GG_NER	31	-1.42439	0.0609822	0.592472
GO_MULTI_ORGANISM_METABOLIC_PROCESS	133	-1.4223	0.0176327	0.595751
GO_NUCLEAR_TRANSCRIBED_MRNA_CATABOLIC_PROCESS_EXONUCLEOLYTIC	29	-1.41881	0.0696721	0.604413
GO_NEGATIVE_REGULATION_OF_CELL_CYCLE_PHASE_TRANSITION	127	-1.4178	0.0231185	0.603354
GO_INTRA_GOLGI_VESICLE_MEDIATED_TRANSPORT	37	-1.41163	0.0589991	0.623358
GO_RIBOSOME_BIOGENESIS	293	-1.41029	0.00584795	0.623653
GO_INDOLE_CONTAINING_COMPOUND_METABOLIC_PROCESS	16	-1.40965	0.0866413	0.621092
GO_CYTOPLASMIC_TRANSLATION	40	-1.40677	0.0635615	0.627762
GO_DEMETHYLATION	42	-1.40634	0.0610593	0.624466
GO_NCRNA_METABOLIC_PROCESS	489	-1.4056	0.00196024	0.62245
GO_TRNA_TRANSPORT	32	-1.4009	0.0731314	0.636881
GO_REGULATION_OF_TRANSLATIONAL_INITIATION	75	-1.39948	0.0448141	0.63777
GO_TRANSCRIPTION_COUPLED_NUCLEOTIDE_EXCISION_REPAIR	70	-1.39385	0.042879	0.656236
GO_RRNA_METABOLIC_PROCESS	244	-1.39092	0.0102259	0.663482
GO_MRNA_PROCESSING	377	-1.39043	0.00439947	0.660428
GO_TRANSCRIPTION_INITIATION_FROM_RNA_POLYMERASE_II_PROMOTER	116	-1.38974	0.0277506	0.65821
REACTOME_METABOLISM_OF_RNA	246	-1.38659	0.0100791	0.666637
REACTOME_ENERGY_DEPENDENT_REGULATION_OF_MTOR_BY_LKB1_AMPK	15	-1.38481	0.107392	0.669232
GO_REGULATION_OF_CELLULAR_RESPONSE_TO_HEAT	69	-1.3837	0.0548832	0.668881
REACTOME_ENDOSOMAL_SORTING_COMPLEX_REQUIRED_FOR_TRANSPORT_ESCRT	24	-1.3834	0.086327	0.665151
GO_REGULATION_OF_SIGNAL_TRANSDUCTION_BY_P53_CLASS_MEDIATOR	142	-1.38211	0.0230237	0.665732
REACTOME_MRNA_SPLICING_MINOR_PATHWAY	41	-1.37857	0.0749825	0.676013
GO_PROTEIN_DEALKYLATION	26	-1.37745	0.0919294	0.675809
GO_ENDOSOME_TO_LYSOSOME_TRANSPORT	37	-1.37568	0.0809816	0.678557
GO_BLASTOCYST_GROWTH	15	-1.37402	0.111152	0.680773
GO_BLOOD_VESSEL_REMODELING	20	-1.37146	0.0957523	0.686935
REACTOME_MICRORNA_MIRNA_BIOGENESIS	17	-1.37094	0.109794	0.684347
REACTOME_3_UTR_MEDIATED_TRANSLATIONAL_REGULATION	99	-1.36912	0.0416317	0.687307
GO_ADIPOSE_TISSUE_DEVELOPMENT	25	-1.3608	0.098187	0.719035
GO_POSITIVE_REGULATION_OF_CELL_CYCLE_PROCESS	187	-1.36077	0.0190749	0.714158
REACTOME_ACTIVATION_OF_THE_MRNA_UPON_BINDING_OF_THE_CAP_BINDING_COMPLEX_AND_EIFS_AND_SUBSEQUENT_BINDING_TO_43S	54	-1.36048	0.071009	0.710485
GO_REGULATION_OF_ENDOCRINE_PROCESS	29	-1.36043	0.0939776	0.705858
GO_TETRAPYRROLE_BIOSYNTHETIC_PROCESS	24	-1.36009	0.103056	0.702561
GO_REGULATION_OF_TRANSCRIPTION_INVOLVED_IN_G1_S_TRANSITION_OF_MITOTIC_CELL_CYCLE	24	-1.35974	0.0971157	0.699353
REACTOME_TRANSCRIPTION	165	-1.35687	0.0258593	0.707221
GO_NEGATIVE_REGULATION_OF_CYCLIN_DEPENDENT_PROTEIN_KINASE_ACTIVITY	27	-1.35558	0.103067	0.708125
REACTOME_MRNA_SPLICING	105	-1.35543	0.0488653	0.704108
GO_PIGMENT_GRANULE_LOCALIZATION	21	-1.3548	0.109611	0.702214
GO_PROTEIN_LOCALIZATION_TO_CYTOSKELETON	26	-1.35391	0.106383	0.701455
GO_PALATE_DEVELOPMENT	50	-1.34827	0.0784178	0.721373
GO_RESPONSE_TO_UV	100	-1.34808	0.0494578	0.717543
GO_CHROMATIN_MODIFICATION	447	-1.34615	0.00594117	0.72145
GO_REGULATION_OF_RESPONSE_TO_DNA_DAMAGE_STIMULUS	125	-1.34526	0.043464	0.72081
GO_RNA_SPLICING_VIA_TRANSESTERIFICATION_REACTIONS	251	-1.34199	0.0225553	0.730739
GO_REGULATION_OF_RELEASE_OF_CYTOCHROME_C_FROM_MITOCHONDRIA	41	-1.34137	0.0848388	0.728862
GO_TERMINATION_OF_RNA_POLYMERASE_II_TRANSCRIPTION	61	-1.33638	0.0761595	0.746795
GO_SOMATIC_STEM_CELL_POPULATION_MAINTENANCE	36	-1.3355	0.0997329	0.746163
GO_NEGATIVE_REGULATION_OF_MITOCHONDRION_ORGANIZATION	33	-1.33378	0.110332	0.749376
GO_REGULATION_OF_PROTEIN_EXPORT_FROM_NUCLEUS	32	-1.33105	0.107638	0.757109
GO_MATURATION_OF_SSU_RRNA	41	-1.33065	0.100473	0.754303
GO_RIBONUCLEOPROTEIN_COMPLEX_LOCALIZATION	109	-1.33063	0.052161	0.749819
GO_VESICLE_DOCKING	43	-1.33062	0.0936793	0.74533
GO_MAINTENANCE_OF_CELL_NUMBER	87	-1.33024	0.063618	0.742539
REACTOME_DEPOSITION_OF_NEW_CENPA_CONTAINING_NUCLEOSOMES_AT_THE_CENTROMERE	40	-1.32668	0.102076	0.754158
GO_NUCLEOBASE_CONTAINING_COMPOUND_TRANSPORT	171	-1.32391	0.034316	0.762267
GO_GENE_SILENCING	152	-1.32271	0.0465041	0.763186
GO_POSITIVE_REGULATION_OF_RESPONSE_TO_DNA_DAMAGE_STIMULUS	56	-1.3207	0.0834364	0.767888
REACTOME_CELL_CYCLE	346	-1.32026	0.0139726	0.765463
REACTOME_NEP_NS2_INTERACTS_WITH_THE_CELLULAR_EXPORT_MACHINERY	27	-1.31748	0.123224	0.773745
GO_PLATELET_MORPHOGENESIS	15	-1.31603	0.144872	0.775913
GO_IRON_ION_TRANSPORT	42	-1.3157	0.108961	0.773014
GO_POSITIVE_REGULATION_OF_ATPASE_ACTIVITY	33	-1.31548	0.116287	0.769657
GO_NEGATIVE_REGULATION_OF_HORMONE_SECRETION	42	-1.31501	0.103328	0.767431
GO_PEPTIDYL_LYSINE_TRIMETHYLATION	22	-1.31494	0.140231	0.76343
GO_RNA_SPLICING	329	-1.31437	0.0186466	0.761633
GO_MULTI_ORGANISM_LOCALIZATION	62	-1.31184	0.0861269	0.768797
GO_FERTILIZATION	71	-1.31131	0.0817982	0.766905
REACTOME_MITOTIC_G1_G1_S_PHASES	123	-1.31038	0.0606407	0.76687
GO_REGULATION_OF_PROTEIN_EXIT_FROM_ENDOPLASMIC_RETICULUM	16	-1.30896	0.149982	0.769046
GO_FEMALE_GAMETE_GENERATION	60	-1.30815	0.0966017	0.768616
GO_PROTEIN_K48_LINKED_DEUBIQUITINATION	17	-1.30766	0.148448	0.766653
GO_CHROMATIN_ASSEMBLY_OR_DISASSEMBLY	118	-1.30682	0.0649522	0.766274
GO_NEGATIVE_REGULATION_OF_CELL_CYCLE	347	-1.3068	0.0169946	0.762254
GO_REGULATION_OF_EXTRINSIC_APOPTOTIC_SIGNALING_PATHWAY_VIA_DEATH_DOMAIN_RECEPTORS	45	-1.30657	0.111246	0.759235
GO_REGULATION_OF_BONE_RESORPTION	23	-1.30634	0.138056	0.756221
GO_PEPTIDYL_LYSINE_METHYLATION	57	-1.30624	0.0949519	0.752707
GO_ACID_SECRETION	31	-1.30546	0.126557	0.752222
GO_HISTONE_H2A_UBIQUITINATION	16	-1.30274	0.159759	0.760347
GO_REGULATION_OF_PROTEIN_PHOSPHATASE_TYPE_2A_ACTIVITY	22	-1.30103	0.145432	0.763921
REACTOME_PERK_REGULATED_GENE_EXPRESSION	26	-1.29721	0.141291	0.777079
REACTOME_PRE_NOTCH_TRANSCRIPTION_AND_TRANSLATION	23	-1.2962	0.140137	0.777701
GO_FORELIMB_MORPHOGENESIS	17	-1.29549	0.151292	0.776861
GO_GOLGI_VESICLE_TRANSPORT	272	-1.29427	0.0367359	0.778339
GO_REGULATION_OF_SYNAPSE_STRUCTURE_OR_ACTIVITY	118	-1.29425	0.0698668	0.774501
GO_NEGATIVE_REGULATION_OF_INTRACELLULAR_PROTEIN_TRANSPORT	75	-1.29381	0.094942	0.772545
GO_POSITIVE_REGULATION_OF_CELL_CYCLE_PHASE_TRANSITION	55	-1.29355	0.112076	0.769863
GO_NEGATIVE_REGULATION_OF_NUCLEOCYTOPLASMIC_TRANSPORT	58	-1.29253	0.107542	0.770523
GO_POSITIVE_REGULATION_OF_POTASSIUM_ION_TRANSPORT	20	-1.2915	0.148047	0.771173
REACTOME_INSULIN_RECEPTOR_RECYCLING	18	-1.29139	0.150855	0.767847
GO_NEGATIVE_REGULATION_OF_MRNA_METABOLIC_PROCESS	32	-1.28968	0.133333	0.771548
REACTOME_ION_TRANSPORT_BY_P_TYPE_ATPASES	20	-1.28932	0.149973	0.769407
GO_PROTEIN_DNA_COMPLEX_SUBUNIT_ORGANIZATION	162	-1.2891	0.0563335	0.766631
GO_PROTEIN_SUMOYLATION	112	-1.28906	0.0731507	0.7631
GO_GENE_SILENCING_BY_RNA	103	-1.28735	0.0770636	0.766943
GO_NCRNA_PROCESSING	362	-1.28609	0.0230476	0.768876
GO_POSITIVE_REGULATION_OF_REPRODUCTIVE_PROCESS	30	-1.28576	0.139004	0.766671
GO_HISTONE_METHYLATION	64	-1.28555	0.100087	0.763957
GO_POSITIVE_REGULATION_OF_PROTEIN_LOCALIZATION_TO_CELL_PERIPHERY	23	-1.28519	0.153246	0.761988
GO_DNA_PACKAGING	124	-1.28515	0.0757895	0.758574
GO_ENDOCRINE_PROCESS	16	-1.28389	0.163714	0.760384
REACTOME_SLC_MEDIATED_TRANSMEMBRANE_TRANSPORT	148	-1.28341	0.0680871	0.75891
GO_NEGATIVE_REGULATION_OF_MITOTIC_CELL_CYCLE	166	-1.28212	0.0633679	0.761024
REACTOME_CELL_CYCLE_MITOTIC	279	-1.28207	0.0315126	0.757698
GO_REGULATION_OF_NEURAL_PRECURSOR_CELL_PROLIFERATION	39	-1.27906	0.130881	0.767298
REACTOME_MRNA_PROCESSING	150	-1.27752	0.0684355	0.770437
GO_REGULATION_OF_SYNAPSE_ASSEMBLY	32	-1.27643	0.14339	0.771717
REACTOME_TRANSPORT_OF_VITAMINS_NUCLEOSIDES_AND_RELATED_MOLECULES	20	-1.2762	0.159606	0.76919
REACTOME_PEPTIDE_CHAIN_ELONGATION	80	-1.27516	0.102352	0.770265
GO_REGULATION_OF_ERAD_PATHWAY	25	-1.27506	0.152712	0.76723
GO_POSTREPLICATION_REPAIR	49	-1.27483	0.124369	0.76481
REACTOME_MRNA_3_END_PROCESSING	33	-1.27415	0.140885	0.764349
GO_EMBRYONIC_SKELETAL_SYSTEM_MORPHOGENESIS	43	-1.27317	0.137036	0.765214
GO_MATURATION_OF_SSU_RRNA_FROM_TRICISTRONIC_RRNA_TRANSCRIPT_SSU_RRNA_5_8S_RRNA_LSU_RRNA_	33	-1.27152	0.146869	0.769025
GO_REGULATION_OF_BONE_REMODELING	25	-1.2715	0.162782	0.76571
GO_FEEDING_BEHAVIOR	30	-1.27129	0.150243	0.763219
GO_CELL_CYCLE_G1_S_PHASE_TRANSITION	97	-1.26915	0.0927989	0.769121
GO_MITOTIC_SPINDLE_ASSEMBLY	34	-1.26886	0.146501	0.767081
GO_REGULATION_OF_CYCLIN_DEPENDENT_PROTEIN_KINASE_ACTIVITY	74	-1.26689	0.114768	0.772219
REACTOME_DNA_STRAND_ELONGATION	29	-1.26582	0.157998	0.773508
REACTOME_LATENT_INFECTION_OF_HOMO_SAPIENS_WITH_MYCOBACTERIUM_TUBERCULOSIS	25	-1.26317	0.166908	0.781689
GO_NEGATIVE_REGULATION_OF_CELL_CYCLE_PROCESS	179	-1.26164	0.0696589	0.785049
GO_NUCLEOTIDE_EXCISION_REPAIR_DNA_GAP_FILLING	23	-1.26042	0.169746	0.787118
GO_ORGAN_FORMATION	17	-1.2601	0.183637	0.785178
GO_PSEUDOURIDINE_SYNTHESIS	16	-1.25949	0.181213	0.784589
GO_BONE_MORPHOGENESIS	38	-1.25838	0.148464	0.786169
GO_NEGATIVE_REGULATION_OF_PEPTIDYL_SERINE_PHOSPHORYLATION	16	-1.25805	0.181751	0.784292
GO_REGULATION_OF_STEM_CELL_PROLIFERATION	46	-1.25696	0.145601	0.785778
GO_ENDOSOME_ORGANIZATION	57	-1.25694	0.131901	0.782599
GO_DEVELOPMENTAL_PROGRAMMED_CELL_DEATH	15	-1.25625	0.187558	0.78243
GO_NEGATIVE_REGULATION_OF_NEURAL_PRECURSOR_CELL_PROLIFERATION	15	-1.25479	0.190744	0.785518
REACTOME_REGULATION_OF_GLUCOKINASE_BY_GLUCOKINASE_REGULATORY_PROTEIN	25	-1.25425	0.175549	0.784618
GO_POSITIVE_REGULATION_OF_MRNA_3_END_PROCESSING	16	-1.25183	0.197385	0.791892
GO_CELL_CYCLE_ARREST	123	-1.25059	0.0940618	0.794029
GO_CELLULAR_DEFENSE_RESPONSE	37	-1.25008	0.149121	0.793053
GO_HORMONE_MEDIATED_SIGNALING_PATHWAY	108	-1.24759	0.108322	0.800716
GO_NEURON_RECOGNITION	15	-1.24729	0.197484	0.79886
GO_REGULATION_OF_NEUROTRANSMITTER_RECEPTOR_ACTIVITY	15	-1.24701	0.201465	0.796893
GO_MEMBRANE_DOCKING	52	-1.24581	0.145873	0.798937
REACTOME_TRANSPORT_OF_MATURE_MRNA_DERIVED_FROM_AN_INTRONLESS_TRANSCRIPT	32	-1.24568	0.170352	0.796309
GO_REGULATION_OF_MRNA_METABOLIC_PROCESS	102	-1.24565	0.110982	0.793337
GO_COVALENT_CHROMATIN_MODIFICATION	290	-1.24456	0.0520102	0.794964
GO_REGULATION_OF_MYELINATION	21	-1.24366	0.185717	0.795745
GO_DIGESTIVE_SYSTEM_DEVELOPMENT	72	-1.24065	0.134346	0.805847
GO_MESODERM_MORPHOGENESIS	36	-1.24049	0.168698	0.803429
GO_CHONDROCYTE_DIFFERENTIATION	31	-1.24043	0.174671	0.800566
GO_CELLULAR_RESPONSE_TO_RADIATION	97	-1.23728	0.115146	0.811259
GO_ENDOMEMBRANE_SYSTEM_ORGANIZATION	374	-1.23685	0.047766	0.810043
GO_POSITIVE_REGULATION_OF_EXTRINSIC_APOPTOTIC_SIGNALING_PATHWAY	45	-1.2367	0.158713	0.807594
REACTOME_PROCESSING_OF_CAPPED_INTRON_CONTAINING_PRE_MRNA	134	-1.23573	0.101118	0.808815
GO_ORGAN_GROWTH	31	-1.2356	0.181818	0.806306
GO_REGULATION_OF_CELL_CYCLE_PHASE_TRANSITION	275	-1.23541	0.0654248	0.804108
GO_TRIVALENT_INORGANIC_CATION_TRANSPORT	30	-1.23501	0.184473	0.802744
GO_MICROTUBULE_ORGANIZING_CENTER_ORGANIZATION	75	-1.23272	0.13915	0.809703
GO_APPENDAGE_DEVELOPMENT	86	-1.23215	0.132544	0.80918
GO_POSITIVE_REGULATION_OF_GLIOGENESIS	34	-1.23094	0.1768	0.811439
GO_SPINAL_CORD_MOTOR_NEURON_DIFFERENTIATION	15	-1.23076	0.21012	0.809209
GO_ODONTOGENESIS_OF_DENTIN_CONTAINING_TOOTH	37	-1.23052	0.174865	0.807245
GO_SKELETAL_SYSTEM_DEVELOPMENT	246	-1.23046	0.0727578	0.80455
REACTOME_PRE_NOTCH_EXPRESSION_AND_PROCESSING	38	-1.22956	0.176333	0.805507
REACTOME_ASPARAGINE_N_LINKED_GLYCOSYLATION	72	-1.22894	0.142275	0.805228
GO_SODIUM_ION_TRANSPORT	64	-1.22886	0.148403	0.802654
GO_HEART_VALVE_DEVELOPMENT	16	-1.22802	0.213029	0.803313
GO_ANTIMICROBIAL_HUMORAL_RESPONSE	20	-1.22774	0.202415	0.801625
GO_MICROTUBULE_NUCLEATION	18	-1.227	0.208378	0.801911
GO_REGULATION_OF_CENTROSOME_DUPLICATION	28	-1.22699	0.180442	0.799123
GO_NUCLEAR_TRANSPORT	302	-1.2268	0.0671352	0.797065
GO_DNA_TEMPLATED_TRANSCRIPTION_INITIATION	157	-1.22398	0.104411	0.806175
GO_POSITIVE_REGULATION_OF_CELL_CYCLE	253	-1.22364	0.0699771	0.80473
GO_REGULATION_OF_PROTEIN_OLIGOMERIZATION	25	-1.22344	0.204843	0.802761
REACTOME_FACTORS_INVOLVED_IN_MEGAKARYOCYTE_DEVELOPMENT_AND_PLATELET_PRODUCTION	81	-1.22243	0.140558	0.804221
REACTOME_PIP3_ACTIVATES_AKT_SIGNALING	27	-1.22198	0.197075	0.803314
GO_REGULATION_OF_MEGAKARYOCYTE_DIFFERENTIATION	18	-1.22118	0.212934	0.803895
GO_RNA_CAPPING	33	-1.21826	0.188046	0.813604
GO_RESPONSE_TO_ACTIVITY	42	-1.21792	0.179134	0.812252
GO_PEPTIDYL_LYSINE_MODIFICATION	272	-1.21724	0.0809257	0.8124
REACTOME_ANTIGEN_PRESENTATION_FOLDING_ASSEMBLY_AND_PEPTIDE_LOADING_OF_CLASS_I_MHC	19	-1.21625	0.21191	0.813756
REACTOME_LAGGING_STRAND_SYNTHESIS	18	-1.2149	0.21575	0.816753
GO_VENTRAL_SPINAL_CORD_DEVELOPMENT	16	-1.21484	0.22655	0.814213
GO_RIBONUCLEOTIDE_CATABOLIC_PROCESS	22	-1.21418	0.215857	0.81431
REACTOME_TRANSLATION	138	-1.2124	0.120181	0.819141
GO_CENTROMERE_COMPLEX_ASSEMBLY	36	-1.21178	0.197044	0.819007
GO_PIGMENTATION	65	-1.2117	0.166611	0.816577
GO_EMBRYONIC_ORGAN_MORPHOGENESIS	141	-1.21152	0.122122	0.814619
GO_ORGANIC_CYCLIC_COMPOUND_CATABOLIC_PROCESS	347	-1.21034	0.0706497	0.81692
REACTOME_P53_DEPENDENT_G1_DNA_DAMAGE_RESPONSE	51	-1.21018	0.180959	0.814887
REACTOME_ION_CHANNEL_TRANSPORT	22	-1.20701	0.221739	0.825706
GO_INSULIN_SECRETION	22	-1.20623	0.217439	0.826365
GO_PROTEIN_LOCALIZATION_TO_CENTROSOME	17	-1.20598	0.231007	0.82472
GO_MISMATCH_REPAIR	25	-1.20402	0.213654	0.83042
GO_INTRINSIC_APOPTOTIC_SIGNALING_PATHWAY_BY_P53_CLASS_MEDIATOR	45	-1.20285	0.191184	0.832698
GO_REGULATION_OF_MITOCHONDRIAL_MEMBRANE_PERMEABILITY_INVOLVED_IN_APOPTOTIC_PROCESS	20	-1.20243	0.223463	0.831813
REACTOME_PI3K_EVENTS_IN_ERBB4_SIGNALING	31	-1.20131	0.210669	0.833873
GO_MITOTIC_SPINDLE_ORGANIZATION	57	-1.20041	0.186167	0.835057
GO_REGULATION_OF_MRNA_CATABOLIC_PROCESS	24	-1.19842	0.220791	0.840993
GO_REGULATION_OF_DNA_TEMPLATED_TRANSCRIPTION_ELONGATION	33	-1.19799	0.216946	0.840126
GO_REGULATION_OF_REPRODUCTIVE_PROCESS	70	-1.19619	0.171177	0.845216
GO_REGULATION_OF_CELL_CYCLE_G1_S_PHASE_TRANSITION	127	-1.19558	0.145528	0.845165
GO_HISTONE_EXCHANGE	38	-1.19246	0.210498	0.856199
GO_RNA_LOCALIZATION	164	-1.19234	0.131634	0.854005
GO_HISTONE_DEUBIQUITINATION	21	-1.19177	0.235272	0.853789
GO_DNA_CONFORMATION_CHANGE	195	-1.19054	0.122324	0.856445
GO_REGULATION_OF_MITOTIC_CELL_CYCLE	384	-1.18952	0.0770123	0.858202
GO_GROWTH	253	-1.18867	0.106615	0.859267
GO_PROTEIN_LOCALIZATION_TO_MITOCHONDRION	64	-1.1882	0.185286	0.858611
GO_INTRACELLULAR_ESTROGEN_RECEPTOR_SIGNALING_PATHWAY	15	-1.18796	0.247016	0.856972
GO_MATURATION_OF_5_8S_RRNA_FROM_TRICISTRONIC_RRNA_TRANSCRIPT_SSU_RRNA_5_8S_RRNA_LSU_RRNA_	18	-1.18779	0.240518	0.855028
GO_SODIUM_ION_TRANSMEMBRANE_TRANSPORT	39	-1.18626	0.2121	0.859031
GO_POSITIVE_REGULATION_OF_MULTICELLULAR_ORGANISM_GROWTH	16	-1.18559	0.249953	0.859305
REACTOME_G1_S_TRANSITION	99	-1.18434	0.175409	0.86212
GO_REGULATION_OF_SYNAPSE_ORGANIZATION	49	-1.18325	0.210701	0.864202
GO_CATECHOLAMINE_METABOLIC_PROCESS	20	-1.17939	0.250454	0.878489
GO_TRANSLESION_SYNTHESIS	36	-1.17907	0.230484	0.877257
REACTOME_ANTIVIRAL_MECHANISM_BY_IFN_STIMULATED_GENES	65	-1.17779	0.193772	0.880228
REACTOME_GENERIC_TRANSCRIPTION_PATHWAY	271	-1.17627	0.118885	0.884302
GO_GOLGI_TO_ENDOSOME_TRANSPORT	19	-1.17597	0.252403	0.882932
GO_VIRAL_LIFE_CYCLE	257	-1.17579	0.12244	0.881055
GO_RNA_PHOSPHODIESTER_BOND_HYDROLYSIS_EXONUCLEOLYTIC	33	-1.17527	0.236551	0.880751
GO_POSITIVE_REGULATION_OF_NEURAL_PRECURSOR_CELL_PROLIFERATION	18	-1.17472	0.262038	0.88053
GO_TRANSCRIPTION_FROM_RNA_POLYMERASE_III_PROMOTER	38	-1.17413	0.227289	0.880475
REACTOME_BASIGIN_INTERACTIONS	19	-1.17408	0.246855	0.878061
REACTOME_BIOSYNTHESIS_OF_THE_N_GLYCAN_PRECURSOR_DOLICHOL_LIPID_LINKED_OLIGOSACCHARIDE_LLO_AND_TRANSFER_TO_A_NASCENT_PROTEIN	27	-1.174	0.237025	0.875793
GO_SKELETAL_SYSTEM_MORPHOGENESIS	99	-1.17377	0.178776	0.874208
GO_NEGATIVE_REGULATION_OF_CYSTEINE_TYPE_ENDOPEPTIDASE_ACTIVITY	70	-1.17317	0.205663	0.874227
REACTOME_DNA_REPLICATION	169	-1.17298	0.15963	0.872451
GO_DNA_REPAIR	411	-1.1726	0.0945575	0.871579
REACTOME_PI_3K_CASCADE	36	-1.17173	0.23795	0.872769
GO_NEGATIVE_REGULATION_OF_CATABOLIC_PROCESS	160	-1.17161	0.154067	0.870728
GO_SECONDARY_METABOLIC_PROCESS	26	-1.17141	0.247395	0.869033
GO_CELLULAR_KETONE_METABOLIC_PROCESS	51	-1.17118	0.218847	0.867516
GO_CELL_FATE_SPECIFICATION	21	-1.17103	0.255359	0.865638
GO_DNA_DOUBLE_STRAND_BREAK_PROCESSING	17	-1.17081	0.260091	0.864058
REACTOME_ACTIVATION_OF_ATR_IN_RESPONSE_TO_REPLICATION_STRESS	31	-1.16913	0.239029	0.868834
REACTOME_CLEAVAGE_OF_GROWING_TRANSCRIPT_IN_THE_TERMINATION_REGION_	42	-1.16872	0.231876	0.868084
GO_MAMMARY_GLAND_MORPHOGENESIS	25	-1.16798	0.247775	0.868861
GO_CENTROSOME_CYCLE	40	-1.16714	0.235806	0.870014
GO_GLYCOSYL_COMPOUND_BIOSYNTHETIC_PROCESS	100	-1.16697	0.189307	0.868255
GO_BINDING_OF_SPERM_TO_ZONA_PELLUCIDA	16	-1.16669	0.268446	0.866966
GO_GANGLIOSIDE_METABOLIC_PROCESS	17	-1.16565	0.270221	0.869024
GO_MULTIVESICULAR_BODY_ORGANIZATION	28	-1.165	0.247159	0.869353
REACTOME_G0_AND_EARLY_G1	19	-1.16474	0.26024	0.868012
GO_REGULATION_OF_CHROMATIN_ORGANIZATION	120	-1.16455	0.178735	0.866391
GO_MULTI_ORGANISM_ORGANELLE_ORGANIZATION	21	-1.16428	0.260981	0.865111
GO_NEGATIVE_REGULATION_OF_PROTEIN_ACETYLATION	16	-1.16337	0.271659	0.86657
REACTOME_SIGNALING_BY_WNT	61	-1.16309	0.217151	0.86535
GO_NEGATIVE_REGULATION_OF_LEUKOCYTE_MIGRATION	17	-1.16294	0.271739	0.863572
GO_NUCLEOTIDE_TRANSPORT	20	-1.16234	0.264695	0.86373
GO_REGULATION_OF_ESTABLISHMENT_OR_MAINTENANCE_OF_CELL_POLARITY	18	-1.16111	0.270717	0.866551
GO_SEXUAL_REPRODUCTION	406	-1.15986	0.109703	0.869541
GO_DNA_DAMAGE_RESPONSE_DETECTION_OF_DNA_DAMAGE	35	-1.15944	0.24467	0.868873
GO_DEVELOPMENTAL_GROWTH	204	-1.15919	0.160339	0.867557
GO_PROTEIN_EXIT_FROM_ENDOPLASMIC_RETICULUM	19	-1.15856	0.27402	0.867847
REACTOME_S_PHASE	100	-1.15831	0.197878	0.866561
GO_SENSORY_ORGAN_MORPHOGENESIS	117	-1.15786	0.187602	0.866113
GO_NEGATIVE_REGULATION_OF_CELLULAR_CATABOLIC_PROCESS	125	-1.15703	0.187829	0.867248
GO_RNA_POLYADENYLATION	29	-1.15682	0.25818	0.865785
GO_ORGANELLE_FISSION	391	-1.15534	0.118703	0.869659
GO_PHENOL_CONTAINING_COMPOUND_METABOLIC_PROCESS	39	-1.15409	0.248532	0.872671
GO_NEUROPEPTIDE_SIGNALING_PATHWAY	24	-1.15308	0.270863	0.874581
GO_PIGMENT_BIOSYNTHETIC_PROCESS	39	-1.15166	0.255394	0.878282
GO_SPLICEOSOMAL_COMPLEX_ASSEMBLY	50	-1.15149	0.240493	0.876651
GO_DOUBLE_STRAND_BREAK_REPAIR	139	-1.15067	0.18599	0.877838
REACTOME_PI3K_CASCADE	47	-1.1504	0.245074	0.876644
GO_POSITIVE_REGULATION_OF_MITOCHONDRIAL_MEMBRANE_PERMEABILITY	17	-1.15009	0.284116	0.875648
REACTOME_PKB_MEDIATED_EVENTS	26	-1.14965	0.271639	0.875193
GO_PHOSPHATIDYLINOSITOL_3_PHOSPHATE_BIOSYNTHETIC_PROCESS	30	-1.14929	0.263429	0.874452
GO_HYDROGEN_TRANSPORT	103	-1.14837	0.210535	0.87606
REACTOME_HOST_INTERACTIONS_OF_HIV_FACTORS	117	-1.14833	0.20023	0.873891
GO_EMBRYONIC_SKELETAL_SYSTEM_DEVELOPMENT	55	-1.14822	0.239209	0.872096
GO_EMBRYO_DEVELOPMENT_ENDING_IN_BIRTH_OR_EGG_HATCHING	350	-1.1482	0.133451	0.869902
GO_REGULATION_OF_ORGANIC_ACID_TRANSPORT	30	-1.14795	0.272261	0.868686
GO_NEGATIVE_REGULATION_OF_I_KAPPAB_KINASE_NF_KAPPAB_SIGNALING	43	-1.14784	0.25255	0.866895
GO_REGULATION_OF_INTRINSIC_APOPTOTIC_SIGNALING_PATHWAY_BY_P53_CLASS_MEDIATOR	20	-1.14726	0.282538	0.867046
GO_MITOCHONDRIAL_TRANSLATION	107	-1.14723	0.20498	0.864919
GO_BLASTOCYST_DEVELOPMENT	47	-1.14718	0.249693	0.862901
GO_REGULATION_OF_DNA_DAMAGE_RESPONSE_SIGNAL_TRANSDUCTION_BY_P53_CLASS_MEDIATOR	23	-1.14612	0.275595	0.865088
GO_EYE_DEVELOPMENT	182	-1.14587	0.175733	0.863906
GO_TRANSLATIONAL_TERMINATION	92	-1.14561	0.218429	0.862811
GO_POSITIVE_REGULATION_OF_NOTCH_SIGNALING_PATHWAY	26	-1.14522	0.275454	0.862232
GO_CLEAVAGE_INVOLVED_IN_RRNA_PROCESSING	18	-1.14471	0.282047	0.862164
GO_VESICLE_ORGANIZATION	216	-1.14453	0.180368	0.860727
GO_NEGATIVE_REGULATION_OF_PROTEIN_MATURATION	25	-1.14345	0.28125	0.863037
GO_IN_UTERO_EMBRYONIC_DEVELOPMENT	220	-1.14335	0.174868	0.861277
GO_NEGATIVE_REGULATION_OF_REPRODUCTIVE_PROCESS	27	-1.14313	0.275427	0.860004
REACTOME_PI3K_AKT_ACTIVATION	34	-1.14296	0.261968	0.858534
REACTOME_SYNTHESIS_OF_DNA	86	-1.14218	0.218055	0.859565
GO_NEGATIVE_REGULATION_OF_CANONICAL_WNT_SIGNALING_PATHWAY	119	-1.14115	0.211068	0.861675
GO_DNA_TEMPLATED_TRANSCRIPTION_TERMINATION	97	-1.13978	0.223309	0.86527
GO_NLS_BEARING_PROTEIN_IMPORT_INTO_NUCLEUS	20	-1.13782	0.29579	0.871292
GO_REGULATION_OF_SODIUM_ION_TRANSPORT	47	-1.13774	0.255963	0.869454
GO_CELL_CYCLE_PHASE_TRANSITION	225	-1.13508	0.179698	0.878327
GO_CHROMATIN_SILENCING	57	-1.1346	0.257987	0.878142
GO_CAMP_METABOLIC_PROCESS	20	-1.13416	0.291224	0.877842
GO_EYE_MORPHOGENESIS	69	-1.13285	0.250642	0.881143
GO_REGULATION_OF_TRANSCRIPTION_ELONGATION_FROM_RNA_POLYMERASE_II_PROMOTER	20	-1.1316	0.298526	0.884228
GO_PEROXISOME_ORGANIZATION	31	-1.13156	0.279908	0.882244
GO_REGULATION_OF_LIPID_TRANSPORT	62	-1.13132	0.262028	0.881066
GO_REGULATION_OF_DOUBLE_STRAND_BREAK_REPAIR	30	-1.13056	0.288468	0.882095
GO_NEUROTROPHIN_SIGNALING_PATHWAY	17	-1.13	0.304104	0.882294
GO_REGULATION_OF_NEUROBLAST_PROLIFERATION	15	-1.12962	0.302512	0.881724
GO_MUSCLE_ORGAN_DEVELOPMENT	147	-1.12856	0.215524	0.884086
GO_EPITHELIAL_TO_MESENCHYMAL_TRANSITION	27	-1.12851	0.294225	0.882149
REACTOME_G2_M_CHECKPOINTS	36	-1.12533	0.283039	0.893307
GO_MITOTIC_NUCLEAR_DIVISION	305	-1.12492	0.177472	0.892911
GO_OOGENESIS	43	-1.12488	0.282029	0.890939
REACTOME_TRANSMEMBRANE_TRANSPORT_OF_SMALL_MOLECULES	242	-1.12437	0.192231	0.890925
GO_REGIONALIZATION	151	-1.12288	0.220824	0.895025
GO_RESPONSE_TO_GROWTH_FACTOR	312	-1.12162	0.181521	0.898161
GO_PEPTIDE_CATABOLIC_PROCESS	17	-1.12116	0.315356	0.897977
GO_RIBOSOMAL_SMALL_SUBUNIT_ASSEMBLY	15	-1.11987	0.322257	0.901261
GO_LONG_TERM_MEMORY	15	-1.11984	0.320595	0.899261
GO_MULTICELLULAR_ORGANISM_AGING	20	-1.11972	0.307845	0.897611
GO_DNA_CATABOLIC_PROCESS_ENDONUCLEOLYTIC	17	-1.11936	0.318923	0.89699
GO_REGULATION_OF_PROTEIN_HOMOOLIGOMERIZATION	15	-1.11891	0.325159	0.896733
GO_FOREBRAIN_GENERATION_OF_NEURONS	28	-1.11862	0.304363	0.895848
GO_SMOOTHENED_SIGNALING_PATHWAY	49	-1.11795	0.275174	0.896587
GO_PROTEIN_LOCALIZATION_TO_ORGANELLE	473	-1.11738	0.16013	0.896883
GO_PROTEIN_STABILIZATION	110	-1.11656	0.243778	0.898172
GO_PEPTIDYL_GLUTAMIC_ACID_MODIFICATION	18	-1.11639	0.319216	0.896792
GO_REGULATION_OF_HORMONE_SECRETION	149	-1.11605	0.229948	0.896141
REACTOME_APC_C_CDC20_MEDIATED_DEGRADATION_OF_MITOTIC_PROTEINS	59	-1.11508	0.28458	0.898149
GO_GAMETE_GENERATION	346	-1.11443	0.186388	0.898791
GO_NUCLEIC_ACID_PHOSPHODIESTER_BOND_HYDROLYSIS	206	-1.11441	0.220932	0.896787
GO_APOPTOTIC_NUCLEAR_CHANGES	20	-1.11302	0.3254	0.900504
GO_PROTEIN_ALKYLATION	91	-1.11296	0.263184	0.898656
GO_POSITIVE_REGULATION_OF_VIRAL_TRANSCRIPTION	32	-1.10994	0.299299	0.909226
GO_TRANSLATIONAL_INITIATION	136	-1.10921	0.243855	0.910261
GO_SIGNAL_TRANSDUCTION_IN_ABSENCE_OF_LIGAND	24	-1.10887	0.318519	0.909601
GO_SUBSTRATE_DEPENDENT_CELL_MIGRATION	18	-1.10881	0.328264	0.907788
GO_POSITIVE_REGULATION_OF_MULTI_ORGANISM_PROCESS	122	-1.10847	0.252034	0.907113
GO_RESPONSE_TO_RADIATION	279	-1.10789	0.210193	0.907448
GO_ORGANELLE_ASSEMBLY	378	-1.10756	0.191198	0.906801
GO_MATURATION_OF_5_8S_RRNA	27	-1.10689	0.316872	0.907552
GO_DEFENSE_RESPONSE_TO_FUNGUS	18	-1.10635	0.325212	0.907738
GO_RECEPTOR_CLUSTERING	27	-1.10543	0.310326	0.909583
GO_HOMOPHILIC_CELL_ADHESION_VIA_PLASMA_MEMBRANE_ADHESION_MOLECULES	34	-1.10516	0.312181	0.908609
GO_NEGATIVE_REGULATION_OF_TRANSMEMBRANE_RECEPTOR_PROTEIN_SERINE_THREONINE_KINASE_SIGNALING_PATHWAY	67	-1.10489	0.281029	0.907753
GO_NEGATIVE_REGULATION_OF_INTRINSIC_APOPTOTIC_SIGNALING_PATHWAY_BY_P53_CLASS_MEDIATOR	16	-1.1032	0.344001	0.912763
GO_NEGATIVE_REGULATION_OF_TRANSFORMING_GROWTH_FACTOR_BETA_RECEPTOR_SIGNALING_PATHWAY	49	-1.10317	0.297761	0.910866
GO_NEGATIVE_REGULATION_OF_RESPONSE_TO_DNA_DAMAGE_STIMULUS	44	-1.10305	0.303735	0.909367
REACTOME_CYCLIN_E_ASSOCIATED_EVENTS_DURING_G1_S_TRANSITION_	59	-1.10182	0.294821	0.912448
GO_POST_GOLGI_VESICLE_MEDIATED_TRANSPORT	78	-1.09949	0.285593	0.920111
GO_NUCLEOSIDE_TRIPHOSPHATE_BIOSYNTHETIC_PROCESS	50	-1.09886	0.303612	0.920719
GO_MRNA_CLEAVAGE	16	-1.09809	0.341958	0.921945
GO_COLLAGEN_FIBRIL_ORGANIZATION	17	-1.09747	0.336246	0.922493
GO_LONG_CHAIN_FATTY_ACID_TRANSPORT	25	-1.09699	0.330895	0.92249
GO_O_GLYCAN_PROCESSING	27	-1.09698	0.32758	0.920537
GO_ACTIN_MEDIATED_CELL_CONTRACTION	34	-1.09494	0.322575	0.927049
GO_POSITIVE_REGULATION_OF_MRNA_PROCESSING	28	-1.09474	0.330241	0.925851
REACTOME_APC_C_CDH1_MEDIATED_DEGRADATION_OF_CDC20_AND_OTHER_APC_C_CDH1_TARGETED_PROTEINS_IN_LATE_MITOSIS_EARLY_G1	61	-1.09378	0.307852	0.92783
GO_CRANIAL_SKELETAL_SYSTEM_DEVELOPMENT	32	-1.09378	0.330349	0.925846
GO_REGULATION_OF_TRANSCRIPTION_FROM_RNA_POLYMERASE_III_PROMOTER	20	-1.09312	0.338666	0.926586
GO_NEGATIVE_REGULATION_OF_CELLULAR_PROTEIN_LOCALIZATION	108	-1.09306	0.282863	0.924823
GO_NEGATIVE_REGULATION_OF_MRNA_SPLICING_VIA_SPLICEOSOME	18	-1.09242	0.342176	0.925521
REACTOME_SRP_DEPENDENT_COTRANSLATIONAL_PROTEIN_TARGETING_TO_MEMBRANE	103	-1.09206	0.287967	0.925048
GO_RESPONSE_TO_STEROL	16	-1.09204	0.345741	0.923151
GO_ER_TO_GOLGI_VESICLE_MEDIATED_TRANSPORT	146	-1.09197	0.266116	0.921503
GO_NUCLEUS_ORGANIZATION	119	-1.09129	0.282371	0.92232
REACTOME_EXTENSION_OF_TELOMERES	25	-1.09023	0.336438	0.924751
GO_ONE_CARBON_METABOLIC_PROCESS	26	-1.09	0.333212	0.923746
GO_POSITIVE_REGULATION_OF_MRNA_METABOLIC_PROCESS	39	-1.08947	0.330583	0.924009
GO_POSITIVE_REGULATION_OF_INSULIN_SECRETION_INVOLVED_IN_CELLULAR_RESPONSE_TO_GLUCOSE_STIMULUS	17	-1.08914	0.352888	0.923467
REACTOME_E2F_MEDIATED_REGULATION_OF_DNA_REPLICATION	29	-1.0884	0.341153	0.924536
GO_NEGATIVE_REGULATION_OF_EXTRINSIC_APOPTOTIC_SIGNALING_PATHWAY_VIA_DEATH_DOMAIN_RECEPTORS	28	-1.08767	0.339171	0.925593
REACTOME_KINESINS	15	-1.08766	0.352652	0.923702
GO_TISSUE_MIGRATION	48	-1.08682	0.321045	0.925198
REACTOME_SIGNALING_BY_ERBB2	77	-1.08614	0.310496	0.926088
GO_NEGATIVE_REGULATION_OF_PROTEIN_SERINE_THREONINE_KINASE_ACTIVITY	103	-1.08594	0.294196	0.924979
GO_BONE_DEVELOPMENT	94	-1.08539	0.301671	0.925357
GO_MONOVALENT_INORGANIC_CATION_TRANSPORT	239	-1.08521	0.258999	0.92417
GO_CELL_DIFFERENTIATION_IN_SPINAL_CORD	17	-1.08434	0.362441	0.925868
GO_RESPONSE_TO_HEAT	61	-1.08418	0.316321	0.924579
GO_PROTEIN_LOCALIZATION_TO_ENDOPLASMIC_RETICULUM	114	-1.08368	0.302118	0.924741
GO_RIBOSOMAL_LARGE_SUBUNIT_BIOGENESIS	45	-1.08364	0.337086	0.922994
GO_POSITIVE_REGULATION_OF_SYNAPSE_ASSEMBLY	23	-1.08345	0.354185	0.921857
GO_REGULATION_OF_NUCLEOCYTOPLASMIC_TRANSPORT	174	-1.08144	0.28464	0.928196
GO_POSITIVE_REGULATION_OF_LIGASE_ACTIVITY	97	-1.08123	0.307641	0.927184
GO_REGULATION_OF_P38MAPK_CASCADE	20	-1.07992	0.359068	0.930667
GO_PROTEIN_INSERTION_INTO_MEMBRANE	16	-1.07831	0.361551	0.935391
GO_INTRACELLULAR_STEROID_HORMONE_RECEPTOR_SIGNALING_PATHWAY	60	-1.07734	0.325666	0.93745
GO_REGULATION_OF_TELOMERASE_RNA_LOCALIZATION_TO_CAJAL_BODY	15	-1.07733	0.35871	0.93562
GO_NEGATIVE_REGULATION_OF_HISTONE_MODIFICATION	31	-1.07681	0.345402	0.935855
GO_PEPTIDYL_PROLINE_MODIFICATION	42	-1.07597	0.336096	0.937378
GO_SOMITE_DEVELOPMENT	42	-1.07583	0.345579	0.936073
GO_PROTEIN_O_LINKED_GLYCOSYLATION	61	-1.07578	0.337209	0.934399
GO_PROTEIN_N_LINKED_GLYCOSYLATION	63	-1.07567	0.326887	0.932982
GO_LIPID_LOCALIZATION	165	-1.07372	0.299104	0.939026
GO_REGULATION_OF_CELL_GROWTH	270	-1.07362	0.280665	0.937577
REACTOME_GAB1_SIGNALOSOME	34	-1.07323	0.353921	0.93729
GO_REGULATION_OF_TISSUE_REMODELING	38	-1.0731	0.35138	0.935961
GO_HYDROGEN_ION_TRANSMEMBRANE_TRANSPORT	79	-1.07308	0.328275	0.934185
GO_DNA_SYNTHESIS_INVOLVED_IN_DNA_REPAIR	63	-1.07265	0.330802	0.934085
GO_REGULATION_OF_OSTEOCLAST_DIFFERENTIATION	44	-1.07134	0.349248	0.937485
GO_POSITIVE_REGULATION_OF_SEQUENCE_SPECIFIC_DNA_BINDING_TRANSCRIPTION_FACTOR_ACTIVITY	173	-1.07123	0.302186	0.936091
GO_PROTEIN_TARGETING_TO_MITOCHONDRION	46	-1.0709	0.348748	0.935562
REACTOME_ACTIVATION_OF_GENES_BY_ATF4	23	-1.07087	0.360984	0.933876
REACTOME_AMYLOIDS	41	-1.07028	0.343969	0.934395
GO_NEGATIVE_REGULATION_OF_RESPONSE_TO_BIOTIC_STIMULUS	25	-1.06977	0.363119	0.934616
GO_REGULATION_OF_CELLULAR_AMIDE_METABOLIC_PROCESS	297	-1.06916	0.279429	0.93527
GO_NOTCH_SIGNALING_PATHWAY	74	-1.06832	0.347217	0.936772
GO_MEMBRANE_BUDDING	99	-1.06737	0.328691	0.938831
GO_REGULATION_OF_PROTEIN_INSERTION_INTO_MITOCHONDRIAL_MEMBRANE_INVOLVED_IN_APOPTOTIC_SIGNALING_PATHWAY	28	-1.06681	0.365699	0.939266
GO_ESTABLISHMENT_OF_PROTEIN_LOCALIZATION_TO_ENDOPLASMIC_RETICULUM	99	-1.06666	0.334056	0.938047
GO_ANAPHASE_PROMOTING_COMPLEX_DEPENDENT_CATABOLIC_PROCESS	70	-1.06606	0.343502	0.938676
GO_RESPONSE_TO_IONIZING_RADIATION	116	-1.06603	0.328688	0.937009
REACTOME_DESTABILIZATION_OF_MRNA_BY_KSRP	17	-1.06598	0.372983	0.935387
REACTOME_PI3K_EVENTS_IN_ERBB2_SIGNALING	34	-1.0655	0.36	0.935517
GO_CONNECTIVE_TISSUE_DEVELOPMENT	102	-1.065	0.329907	0.935723
GO_REGULATION_OF_CENTROSOME_CYCLE	33	-1.06495	0.36544	0.934167
GO_CYCLIC_NUCLEOTIDE_METABOLIC_PROCESS	29	-1.06351	0.369179	0.93813
GO_NEGATIVE_REGULATION_OF_RNA_SPLICING	23	-1.06179	0.377168	0.943278
REACTOME_O_LINKED_GLYCOSYLATION_OF_MUCINS	24	-1.06139	0.37597	0.943081
GO_N_TERMINAL_PROTEIN_AMINO_ACID_MODIFICATION	20	-1.05983	0.372527	0.947546
GO_KETONE_BIOSYNTHETIC_PROCESS	20	-1.05976	0.374614	0.946027
GO_SISTER_CHROMATID_COHESION	92	-1.0592	0.344106	0.946466
REACTOME_TELOMERE_MAINTENANCE	55	-1.05873	0.361835	0.946571
GO_NUCLEOSIDE_MONOPHOSPHATE_BIOSYNTHETIC_PROCESS	72	-1.05827	0.347061	0.946663
GO_NEGATIVE_REGULATION_OF_LYMPHOCYTE_DIFFERENTIATION	23	-1.05602	0.383277	0.953937
GO_HEART_MORPHOGENESIS	115	-1.05537	0.345193	0.954723
REACTOME_DIABETES_PATHWAYS	107	-1.05531	0.351203	0.953171
GO_HEART_DEVELOPMENT	280	-1.0553	0.318305	0.951444
GO_NEGATIVE_REGULATION_OF_BLOOD_PRESSURE	20	-1.05362	0.383611	0.956391
GO_RECOMBINATIONAL_REPAIR	64	-1.05229	0.363293	0.959958
GO_BICARBONATE_TRANSPORT	20	-1.05147	0.38777	0.961423
GO_NEGATIVE_REGULATION_OF_MYELOID_LEUKOCYTE_DIFFERENTIATION	31	-1.05136	0.387824	0.960086
GO_NEGATIVE_REGULATION_OF_CHEMOTAXIS	29	-1.05092	0.379471	0.960133
GO_POSITIVE_REGULATION_OF_OSTEOBLAST_DIFFERENTIATION	38	-1.05068	0.372837	0.959312
GO_NEGATIVE_REGULATION_OF_CELL_MATRIX_ADHESION	21	-1.05062	0.390164	0.957789
GO_POSITIVE_REGULATION_OF_ORGANIC_ACID_TRANSPORT	17	-1.05022	0.400815	0.957611
GO_REGULATION_OF_ANION_TRANSMEMBRANE_TRANSPORT	25	-1.04995	0.392421	0.956882
GO_NEUTRAL_AMINO_ACID_TRANSPORT	20	-1.04994	0.387986	0.955172
REACTOME_AUTODEGRADATION_OF_CDH1_BY_CDH1_APC_C	54	-1.04898	0.367012	0.957288
GO_POSITIVE_REGULATION_OF_VIRAL_PROCESS	77	-1.04869	0.365712	0.956674
REACTOME_RNA_POL_I_PROMOTER_OPENING	32	-1.04867	0.383981	0.95503
GO_SUPEROXIDE_METABOLIC_PROCESS	21	-1.04833	0.397884	0.954631
GO_MATERNAL_PROCESS_INVOLVED_IN_FEMALE_PREGNANCY	43	-1.04818	0.37671	0.953484
REACTOME_MEMBRANE_TRAFFICKING	103	-1.04777	0.365556	0.953358
GO_CYTOCHROME_COMPLEX_ASSEMBLY	16	-1.04768	0.39838	0.951973
GO_REGULATION_OF_NOTCH_SIGNALING_PATHWAY	44	-1.04748	0.372254	0.951049
GO_VENTRICULAR_SYSTEM_DEVELOPMENT	18	-1.04688	0.395915	0.951736
GO_REGULATION_OF_MONOCYTE_CHEMOTAXIS	15	-1.0464	0.406968	0.951943
GO_REGULATION_OF_CELL_CYCLE_G2_M_PHASE_TRANSITION	45	-1.04602	0.383513	0.951692
GO_RESPONSE_TO_ISOQUINOLINE_ALKALOID	16	-1.04499	0.402958	0.95405
REACTOME_CYTOSOLIC_TRNA_AMINOACYLATION	24	-1.04496	0.397528	0.952464
GO_NEGATIVE_REGULATION_OF_PHOSPHORYLATION	308	-1.04317	0.335563	0.957841
GO_REGULATION_OF_NF_KAPPAB_IMPORT_INTO_NUCLEUS	39	-1.04216	0.392309	0.960104
GO_MULTICELLULAR_ORGANISM_GROWTH	62	-1.04168	0.384418	0.960285
GO_HEART_PROCESS	48	-1.0415	0.386607	0.959287
REACTOME_PACKAGING_OF_TELOMERE_ENDS	30	-1.04117	0.39911	0.958907
GO_NEGATIVE_REGULATION_OF_ORGANELLE_ASSEMBLY	21	-1.04076	0.409508	0.958826
GO_DEVELOPMENTAL_PROCESS_INVOLVED_IN_REPRODUCTION	353	-1.04062	0.342845	0.957676
GO_REGULATION_OF_LYMPHOCYTE_CHEMOTAXIS	16	-1.0402	0.414286	0.957628
GO_NEGATIVE_REGULATION_OF_CELLULAR_PROTEIN_CATABOLIC_PROCESS	52	-1.03985	0.392153	0.957313
GO_ARTERY_DEVELOPMENT	47	-1.03967	0.388391	0.956328
GO_PROTEIN_FOLDING	182	-1.03879	0.362476	0.958086
GO_REGULATION_OF_HORMONE_LEVELS	262	-1.03873	0.353606	0.956605
REACTOME_EGFR_DOWNREGULATION	21	-1.03859	0.407838	0.955497
GO_PURINE_NUCLEOSIDE_MONOPHOSPHATE_BIOSYNTHETIC_PROCESS	53	-1.03837	0.392919	0.954658
REACTOME_TRANSPORT_TO_THE_GOLGI_AND_SUBSEQUENT_MODIFICATION	27	-1.03806	0.398747	0.954225
GO_CARDIAC_ATRIUM_DEVELOPMENT	15	-1.03768	0.412184	0.95404
GO_CHAPERONE_MEDIATED_PROTEIN_FOLDING	43	-1.03673	0.391335	0.956055
GO_PLATELET_DERIVED_GROWTH_FACTOR_RECEPTOR_SIGNALING_PATHWAY	32	-1.03651	0.407839	0.955283
GO_ENERGY_COUPLED_PROTON_TRANSPORT_DOWN_ELECTROCHEMICAL_GRADIENT	21	-1.0345	0.416209	0.961487
GO_CYTOPLASMIC_PATTERN_RECOGNITION_RECEPTOR_SIGNALING_PATHWAY	32	-1.03285	0.409115	0.966303
GO_ANTERIOR_POSTERIOR_PATTERN_SPECIFICATION	95	-1.03273	0.389235	0.965075
GO_RESPONSE_TO_EPIDERMAL_GROWTH_FACTOR	21	-1.03266	0.412924	0.963694
GO_TRNA_PROCESSING	106	-1.03239	0.38898	0.96307
GO_DNA_STRAND_ELONGATION_INVOLVED_IN_DNA_REPLICATION	23	-1.03192	0.413885	0.963239
GO_POSITIVE_REGULATION_OF_INTERLEUKIN_10_PRODUCTION	22	-1.03188	0.418765	0.961742
GO_RESPONSE_TO_STARVATION	114	-1.03184	0.384603	0.960263
GO_CELLULAR_RESPONSE_TO_DSRNA	30	-1.03178	0.40416	0.958874
GO_RESPONSE_TO_COPPER_ION	19	-1.03074	0.421129	0.961246
REACTOME_TRANSFERRIN_ENDOCYTOSIS_AND_RECYCLING	20	-1.03007	0.416816	0.962205
GO_UROGENITAL_SYSTEM_DEVELOPMENT	163	-1.02911	0.38954	0.964285
GO_POSITIVE_REGULATION_OF_LIPID_TRANSPORT	33	-1.02856	0.416244	0.964775
GO_BLASTOCYST_FORMATION	22	-1.02827	0.422611	0.964289
GO_ENDOTHELIAL_CELL_MIGRATION	37	-1.02729	0.419768	0.966465
GO_REGULATION_OF_CELL_CYCLE_PROCESS	442	-1.02678	0.370809	0.966844
REACTOME_POST_TRANSLATIONAL_PROTEIN_MODIFICATION	130	-1.02638	0.407569	0.966768
GO_CHROMATIN_REMODELING	118	-1.02614	0.39596	0.966085
GO_CELLULAR_RESPONSE_TO_AMINO_ACID_STARVATION	23	-1.02589	0.423214	0.965449
GO_NEGATIVE_REGULATION_OF_PHOSPHORUS_METABOLIC_PROCESS	381	-1.02583	0.384773	0.964066
GO_EMBRYONIC_ORGAN_DEVELOPMENT	224	-1.02581	0.389043	0.962529
GO_REGULATION_OF_NEURON_MIGRATION	15	-1.02557	0.423766	0.961825
GO_AMINO_ACID_ACTIVATION	52	-1.0254	0.415398	0.960875
GO_POSITIVE_REGULATION_OF_GLUCOSE_METABOLIC_PROCESS	23	-1.02523	0.427143	0.959939
GO_REPRODUCTIVE_SYSTEM_DEVELOPMENT	243	-1.02517	0.389951	0.958551
GO_RECIPROCAL_DNA_RECOMBINATION	28	-1.02419	0.419134	0.960735
GO_REGULATION_OF_HEMATOPOIETIC_PROGENITOR_CELL_DIFFERENTIATION	29	-1.02403	0.416205	0.95974
GO_RESPONSE_TO_ETHANOL	80	-1.02374	0.409362	0.959249
GO_RESPONSE_TO_LIGHT_STIMULUS	184	-1.02374	0.394278	0.957686
GO_PROTEIN_K48_LINKED_UBIQUITINATION	43	-1.02353	0.422743	0.956901
GO_REGULATION_OF_CELLULAR_PROTEIN_LOCALIZATION	434	-1.02318	0.388296	0.956658
GO_RESPONSE_TO_DRUG	281	-1.02274	0.395897	0.956744
GO_PROTEIN_CATABOLIC_PROCESS	478	-1.02199	0.380207	0.958047
GO_MEMBRANE_DISASSEMBLY	44	-1.01995	0.430946	0.964199
GO_GLYCOLIPID_BIOSYNTHETIC_PROCESS	46	-1.0199	0.419886	0.962819
GO_REGULATION_OF_DNA_METABOLIC_PROCESS	268	-1.0199	0.403179	0.961264
GO_NEGATIVE_REGULATION_OF_GENE_EXPRESSION_EPIGENETIC	73	-1.01839	0.416285	0.965443
GO_NEGATIVE_REGULATION_OF_CHROMATIN_MODIFICATION	37	-1.01829	0.425949	0.964267
GO_REGULATION_OF_PROTEIN_IMPORT_INTO_NUCLEUS_TRANSLOCATION	16	-1.0173	0.438225	0.966463
REACTOME_MITOTIC_G2_G2_M_PHASES	71	-1.01711	0.417657	0.96562
GO_NEUTROPHIL_MEDIATED_IMMUNITY	18	-1.01697	0.427149	0.964581
GO_REGULATION_OF_BLOOD_VESSEL_ENDOTHELIAL_CELL_MIGRATION	33	-1.01663	0.433411	0.964305
GO_REGULATION_OF_EMBRYONIC_DEVELOPMENT	62	-1.01618	0.424783	0.96446
GO_REGULATION_OF_VASODILATION	19	-1.016	0.431206	0.963565
GO_REGULATION_OF_LIGASE_ACTIVITY	114	-1.01548	0.422755	0.963993
GO_NEGATIVE_REGULATION_OF_CYTOPLASMIC_TRANSPORT	93	-1.01538	0.428643	0.962795
GO_CELLULAR_COMPONENT_DISASSEMBLY_INVOLVED_IN_EXECUTION_PHASE_OF_APOPTOSIS	36	-1.01527	0.435544	0.961655
GO_CELL_DIVISION	370	-1.01495	0.410625	0.961323
GO_POSITIVE_REGULATION_OF_PATHWAY_RESTRICTED_SMAD_PROTEIN_PHOSPHORYLATION	23	-1.01458	0.439785	0.96117
GO_FEMALE_MEIOTIC_DIVISION	21	-1.01446	0.439003	0.96011
GO_POSITIVE_REGULATION_OF_GLUCOSE_TRANSPORT	29	-1.01428	0.428494	0.959238
GO_REGULATION_OF_PROTEIN_IMPORT	137	-1.01413	0.426475	0.95829
GO_MULTICELLULAR_ORGANISM_REPRODUCTION	447	-1.01386	0.409836	0.957728
GO_POSTTRANSCRIPTIONAL_REGULATION_OF_GENE_EXPRESSION	388	-1.01346	0.420177	0.957708
GO_REGULATION_OF_PROTEIN_LOCALIZATION_TO_NUCLEUS	167	-1.01278	0.410999	0.958744
REACTOME_MITOTIC_M_M_G1_PHASES	151	-1.01224	0.429076	0.959238
GO_RECEPTOR_INTERNALIZATION	35	-1.01181	0.434448	0.959331
GO_NEGATIVE_REGULATION_OF_CELL_GROWTH	112	-1.01181	0.43237	0.957824
GO_EXTRINSIC_APOPTOTIC_SIGNALING_PATHWAY	83	-1.01169	0.431502	0.956755
GO_REGULATION_OF_MEIOTIC_CELL_CYCLE	23	-1.01151	0.439451	0.955905
GO_MACROMOLECULAR_COMPLEX_DISASSEMBLY	165	-1.00922	0.433043	0.962993
GO_MORPHOGENESIS_OF_EMBRYONIC_EPITHELIUM	84	-1.00895	0.44019	0.962538
GO_RESPONSE_TO_ANTIBIOTIC	38	-1.00856	0.439316	0.962466
GO_NEGATIVE_REGULATION_OF_ESTABLISHMENT_OF_PROTEIN_LOCALIZATION	146	-1.00762	0.437921	0.964414
GO_POSITIVE_REGULATION_OF_NF_KAPPAB_TRANSCRIPTION_FACTOR_ACTIVITY	110	-1.0071	0.437397	0.964874
GO_REGULATION_OF_HYDROGEN_PEROXIDE_INDUCED_CELL_DEATH	17	-1.00673	0.451477	0.964767
GO_REGULATION_OF_MEMBRANE_LIPID_DISTRIBUTION	26	-1.00601	0.448524	0.965942
GO_CELLULAR_PROTEIN_COMPLEX_DISASSEMBLY	114	-1.00598	0.43717	0.96456
GO_PHOSPHATIDYLCHOLINE_METABOLIC_PROCESS	37	-1.00491	0.446454	0.967025
GO_VESICLE_MEDIATED_TRANSPORT_BETWEEN_ENDOSOMAL_COMPARTMENTS	19	-1.00425	0.448743	0.967981
GO_NEURAL_TUBE_PATTERNING	16	-1.00424	0.454379	0.966512
GO_REGULATION_OF_PROTEIN_UBIQUITINATION_INVOLVED_IN_UBIQUITIN_DEPENDENT_PROTEIN_CATABOLIC_PROCESS	92	-1.00334	0.448424	0.968359
GO_SKIN_EPIDERMIS_DEVELOPMENT	33	-1.00312	0.455813	0.96768
GO_NEGATIVE_REGULATION_OF_ORGANELLE_ORGANIZATION	307	-1.00291	0.447175	0.966967
GO_ORGANELLE_FUSION	92	-1.0026	0.44707	0.966647
GO_PROTEIN_LOCALIZATION_TO_MEMBRANE	303	-1.00185	0.455618	0.967947
GO_POSITIVE_REGULATION_OF_ALPHA_BETA_T_CELL_ACTIVATION	40	-1.00112	0.450516	0.96917
GO_REGULATION_OF_TRANSMEMBRANE_RECEPTOR_PROTEIN_SERINE_THREONINE_KINASE_SIGNALING_PATHWAY	121	-1.00058	0.450418	0.969665
REACTOME_METABOLISM_OF_PROTEINS	359	-0.999951	0.448459	0.9705
GO_NEGATIVE_REGULATION_OF_CELL_JUNCTION_ASSEMBLY	17	-0.996904	0.464545	0.980319
REACTOME_ORC1_REMOVAL_FROM_CHROMATIN	62	-0.996862	0.456337	0.978976
GO_REGULATION_OF_SPROUTING_ANGIOGENESIS	20	-0.996411	0.469829	0.979162
GO_ORGAN_REGENERATION	59	-0.996152	0.454307	0.978661
GO_POSITIVE_REGULATION_OF_SODIUM_ION_TRANSPORT	22	-0.995959	0.466871	0.977908
GO_AMIDE_BIOSYNTHETIC_PROCESS	447	-0.995575	0.46726	0.977833
REACTOME_CHROMOSOME_MAINTENANCE	89	-0.995185	0.463898	0.977807
GO_NEGATIVE_REGULATION_OF_ENDOTHELIAL_CELL_PROLIFERATION	22	-0.995153	0.462393	0.976444
GO_REGULATION_OF_EXTRINSIC_APOPTOTIC_SIGNALING_PATHWAY	119	-0.995097	0.464257	0.975185
GO_DNA_CATABOLIC_PROCESS	25	-0.994992	0.456665	0.974099
GO_CELL_FATE_DETERMINATION	15	-0.994862	0.470632	0.9731
GO_TISSUE_REGENERATION	28	-0.994836	0.461427	0.971735
GO_REGULATION_OF_PROTEIN_SUMOYLATION	17	-0.994173	0.468858	0.9727
GO_REGULATION_OF_HISTONE_H3_K4_METHYLATION	18	-0.993929	0.464691	0.972138
REACTOME_SIGNALING_BY_INSULIN_RECEPTOR	77	-0.99341	0.463873	0.97258
GO_CELL_CELL_ADHESION_VIA_PLASMA_MEMBRANE_ADHESION_MOLECULES	53	-0.993401	0.467147	0.971161
GO_EAR_MORPHOGENESIS	53	-0.9926	0.471097	0.972654
GO_NEGATIVE_REGULATION_OF_PROTEIN_MODIFICATION_PROCESS	473	-0.991935	0.484805	0.973638
GO_BONE_MINERALIZATION	19	-0.991533	0.466473	0.973649
GO_NEGATIVE_REGULATION_OF_SYNAPTIC_TRANSMISSION	36	-0.991089	0.465572	0.973812
REACTOME_SIGNALING_BY_FGFR_IN_DISEASE	94	-0.989673	0.473559	0.977539
GO_GMP_METABOLIC_PROCESS	15	-0.988976	0.476043	0.978628
GO_ESTABLISHMENT_OF_PROTEIN_LOCALIZATION_TO_ORGANELLE	319	-0.988927	0.488424	0.977355
GO_NEGATIVE_REGULATION_OF_SECRETION	112	-0.98879	0.474256	0.976414
GO_NEGATIVE_REGULATION_OF_WNT_SIGNALING_PATHWAY	142	-0.988664	0.477897	0.97543
GO_ESTABLISHMENT_OF_ENDOTHELIAL_BARRIER	25	-0.988387	0.482808	0.975017
GO_MICROTUBULE_ANCHORING	17	-0.988274	0.468251	0.973997
GO_POSITIVE_REGULATION_OF_G1_S_TRANSITION_OF_MITOTIC_CELL_CYCLE	21	-0.988107	0.468366	0.973182
GO_NEGATIVE_REGULATION_OF_CHROMOSOME_ORGANIZATION	82	-0.988073	0.472646	0.971876
GO_NEURON_FATE_COMMITMENT	21	-0.987702	0.472898	0.971772
GO_RESPONSE_TO_DSRNA	46	-0.98735	0.476207	0.971628
GO_SISTER_CHROMATID_SEGREGATION	145	-0.986964	0.485386	0.971599
GO_CIRCULATORY_SYSTEM_DEVELOPMENT	500	-0.986915	0.494567	0.970356
GO_REGULATION_OF_EXECUTION_PHASE_OF_APOPTOSIS	17	-0.985991	0.471101	0.972266
GO_MOLTING_CYCLE	36	-0.985162	0.478191	0.973836
GO_NEURAL_TUBE_DEVELOPMENT	99	-0.984449	0.482642	0.974977
GO_MUSCLE_STRUCTURE_DEVELOPMENT	240	-0.98434	0.494109	0.973951
GO_DNA_BIOSYNTHETIC_PROCESS	100	-0.98412	0.488453	0.973329
GO_RETINA_HOMEOSTASIS	32	-0.983034	0.47644	0.975842
REACTOME_IL1_SIGNALING	36	-0.982619	0.485881	0.975933
GO_MALE_SEX_DIFFERENTIATION	86	-0.981904	0.493761	0.977095
GO_REGULATION_OF_PROTEIN_ACETYLATION	50	-0.981394	0.485532	0.977525
GO_NEGATIVE_REGULATION_OF_CELL_CYCLE_ARREST	15	-0.981231	0.484498	0.976712
GO_NITROGEN_COMPOUND_TRANSPORT	354	-0.981096	0.512621	0.975801
GO_TISSUE_MORPHOGENESIS	296	-0.979975	0.512088	0.978435
GO_REGULATION_OF_PH	61	-0.979776	0.479478	0.977754
GO_REGULATION_OF_CHROMOSOME_ORGANIZATION	224	-0.979544	0.505438	0.977192
GO_EMBRYONIC_MORPHOGENESIS	307	-0.979519	0.514857	0.975892
GO_ESTABLISHMENT_OF_PROTEIN_LOCALIZATION_TO_MEMBRANE	226	-0.978499	0.510497	0.978123
GO_RESPONSE_TO_ZINC_ION	33	-0.978027	0.490683	0.978396
GO_SKELETAL_MUSCLE_ORGAN_DEVELOPMENT	70	-0.977905	0.500087	0.977448
GO_MALE_GAMETE_GENERATION	267	-0.977211	0.515838	0.978534
GO_PLACENTA_BLOOD_VESSEL_DEVELOPMENT	21	-0.976313	0.488655	0.980359
REACTOME_REGULATION_OF_MITOTIC_CELL_CYCLE	70	-0.976187	0.500086	0.979422
GO_REGULATION_OF_PROTEIN_STABILITY	183	-0.974676	0.522298	0.983416
GO_ORGAN_MORPHOGENESIS	448	-0.974582	0.541846	0.982369
GO_REGULATION_OF_DEPHOSPHORYLATION	110	-0.97424	0.509611	0.982205
GO_CHLORIDE_TRANSPORT	44	-0.974112	0.494009	0.981287
GO_CELLULAR_HORMONE_METABOLIC_PROCESS	57	-0.973776	0.499223	0.981081
REACTOME_BMAL1_CLOCK_NPAS2_ACTIVATES_CIRCADIAN_EXPRESSION	30	-0.97374	0.49437	0.979837
GO_POSITIVE_REGULATION_OF_HEART_CONTRACTION	16	-0.973521	0.501915	0.979235
GO_POSITIVE_REGULATION_OF_MITOCHONDRIAL_OUTER_MEMBRANE_PERMEABILIZATION_INVOLVED_IN_APOPTOTIC_SIGNALING_PATHWAY	35	-0.973347	0.490426	0.978471
GO_POSITIVE_REGULATION_OF_PROTEIN_AUTOPHOSPHORYLATION	17	-0.97319	0.500731	0.977661
GO_MONOCARBOXYLIC_ACID_TRANSPORT	66	-0.97312	0.497872	0.976538
GO_REGULATION_OF_INSULIN_SECRETION_INVOLVED_IN_CELLULAR_RESPONSE_TO_GLUCOSE_STIMULUS	32	-0.972858	0.490448	0.976113
GO_ASSOCIATIVE_LEARNING	39	-0.972141	0.50071	0.977272
REACTOME_SIGNALING_BY_EGFR_IN_CANCER	91	-0.972093	0.505837	0.976087
GO_PROTEIN_HETEROTETRAMERIZATION	20	-0.971898	0.496597	0.975413
GO_FUCOSYLATION	15	-0.971286	0.49348	0.97624
GO_ANTIGEN_PROCESSING_AND_PRESENTATION_OF_PEPTIDE_ANTIGEN_VIA_MHC_CLASS_I	84	-0.971223	0.504885	0.975118
GO_REGULATION_OF_SPINDLE_ORGANIZATION	18	-0.970955	0.500907	0.974696
GO_MITOTIC_RECOMBINATION	35	-0.969422	0.503361	0.978665
GO_REGULATION_OF_B_CELL_DIFFERENTIATION	19	-0.969278	0.503905	0.977834
GO_NUCLEOTIDE_EXCISION_REPAIR	105	-0.969055	0.515228	0.977271
REACTOME_RNA_POL_I_TRANSCRIPTION	54	-0.969048	0.511772	0.975955
GO_NEGATIVE_REGULATION_OF_TRANSFERASE_ACTIVITY	272	-0.969027	0.54287	0.974691
GO_POSITIVE_REGULATION_OF_HORMONE_SECRETION	68	-0.968931	0.508576	0.973691
GO_PROTEIN_K63_LINKED_UBIQUITINATION	33	-0.968571	0.511976	0.973597
REACTOME_DOWNSTREAM_SIGNALING_EVENTS_OF_B_CELL_RECEPTOR_BCR	89	-0.96804	0.514782	0.97412
GO_CELLULAR_RESPONSE_TO_ABIOTIC_STIMULUS	181	-0.966887	0.532883	0.976812
GO_GLYCOSYLATION	179	-0.966882	0.531324	0.975499
GO_CILIUM_MORPHOGENESIS	154	-0.966454	0.531185	0.975649
GO_NEURAL_TUBE_FORMATION	69	-0.966316	0.516107	0.974795
GO_CELLULAR_RESPONSE_TO_DRUG	48	-0.966168	0.513453	0.97399
GO_INNER_EAR_MORPHOGENESIS	43	-0.965969	0.511002	0.97336
GO_PROTEIN_TARGETING	348	-0.965812	0.556247	0.972583
GO_POSITIVE_REGULATION_OF_RELEASE_OF_CYTOCHROME_C_FROM_MITOCHONDRIA	27	-0.965065	0.50645	0.973841
GO_ORGANELLE_LOCALIZATION	314	-0.96497	0.559825	0.972854
GO_MITOTIC_SISTER_CHROMATID_SEGREGATION	75	-0.964585	0.518449	0.972884
REACTOME_NEGATIVE_REGULATORS_OF_RIG_I_MDA5_SIGNALING	30	-0.964385	0.511565	0.972259
GO_TRANSMEMBRANE_RECEPTOR_PROTEIN_SERINE_THREONINE_KINASE_SIGNALING_PATHWAY	120	-0.964371	0.528569	0.971002
GO_CELLULAR_PIGMENTATION	40	-0.964114	0.511019	0.970581
GO_RETROGRADE_PROTEIN_TRANSPORT_ER_TO_CYTOSOL	15	-0.962571	0.506909	0.974582
GO_NUCLEOTIDE_EXCISION_REPAIR_DNA_INCISION	38	-0.961819	0.514758	0.975836
GO_REGULATION_OF_HISTONE_METHYLATION	40	-0.961574	0.519794	0.975359
GO_NEGATIVE_REGULATION_OF_KINASE_ACTIVITY	187	-0.961446	0.547747	0.974495
GO_REGULATION_OF_ANION_TRANSPORT	86	-0.961264	0.531965	0.973821
GO_NEGATIVE_REGULATION_OF_RESPONSE_TO_OXIDATIVE_STRESS	28	-0.961108	0.519481	0.973048
GO_REGULATION_OF_DNA_TEMPLATED_TRANSCRIPTION_INITIATION	26	-0.960751	0.515277	0.972966
GO_DNA_STRAND_ELONGATION	27	-0.960689	0.518196	0.971881
GO_HINDBRAIN_DEVELOPMENT	77	-0.960245	0.522747	0.972105
GO_POSITIVE_REGULATION_OF_PROTEIN_MODIFICATION_BY_SMALL_PROTEIN_CONJUGATION_OR_REMOVAL	172	-0.959848	0.554294	0.972143
GO_EXECUTION_PHASE_OF_APOPTOSIS	47	-0.959788	0.515741	0.971054
GO_REGULATION_OF_STRESS_ACTIVATED_PROTEIN_KINASE_SIGNALING_CASCADE	152	-0.959764	0.551873	0.969853
GO_RNA_PHOSPHODIESTER_BOND_HYDROLYSIS	98	-0.959272	0.541577	0.970224
GO_RESPONSE_TO_TRANSITION_METAL_NANOPARTICLE	100	-0.958672	0.536266	0.970975
GO_PYRIMIDINE_NUCLEOSIDE_TRIPHOSPHATE_METABOLIC_PROCESS	16	-0.958481	0.521534	0.97034
GO_GLUCAN_BIOSYNTHETIC_PROCESS	20	-0.956791	0.52531	0.974772
GO_REGULATION_OF_PATHWAY_RESTRICTED_SMAD_PROTEIN_PHOSPHORYLATION	30	-0.956671	0.522523	0.973904
GO_GERM_CELL_DEVELOPMENT	124	-0.956086	0.55049	0.974579
GO_PEPTIDE_METABOLIC_PROCESS	474	-0.955696	0.611443	0.97461
GO_RNA_SPLICING_VIA_ENDONUCLEOLYTIC_CLEAVAGE_AND_LIGATION	15	-0.955484	0.522358	0.974044
GO_REGULATION_OF_NUCLEOSIDE_METABOLIC_PROCESS	37	-0.954953	0.519951	0.974546
GO_LENS_DEVELOPMENT_IN_CAMERA_TYPE_EYE	37	-0.954827	0.524504	0.973704
GO_REGULATION_OF_EXTRINSIC_APOPTOTIC_SIGNALING_PATHWAY_IN_ABSENCE_OF_LIGAND	34	-0.95481	0.526878	0.972493
GO_VACUOLE_ORGANIZATION	150	-0.95445	0.556946	0.972444
GO_NEGATIVE_REGULATION_OF_APOPTOTIC_SIGNALING_PATHWAY	157	-0.953324	0.565385	0.974939
GO_OLIGOSACCHARIDE_LIPID_INTERMEDIATE_BIOSYNTHETIC_PROCESS	20	-0.952577	0.522583	0.97619
GO_CELLULAR_COMPONENT_ASSEMBLY_INVOLVED_IN_MORPHOGENESIS	163	-0.952361	0.566275	0.975658
GO_AGING	192	-0.95236	0.574256	0.974399
GO_CELLULAR_PROCESS_INVOLVED_IN_REPRODUCTION_IN_MULTICELLULAR_ORGANISM	151	-0.952324	0.562621	0.973261
GO_NON_RECOMBINATIONAL_REPAIR	59	-0.952132	0.543774	0.97264
GO_REGULATION_OF_CHONDROCYTE_DIFFERENTIATION	24	-0.952039	0.52462	0.971697
GO_REGULATION_OF_ESTABLISHMENT_OF_PROTEIN_LOCALIZATION_TO_PLASMA_MEMBRANE	32	-0.951632	0.527922	0.971784
GO_PROTEIN_AUTOUBIQUITINATION	41	-0.951131	0.539082	0.972196
GO_TRANSLATIONAL_ELONGATION	108	-0.951091	0.559238	0.971087
GO_RESPONSE_TO_ISCHEMIA	25	-0.950102	0.535341	0.973124
GO_NEGATIVE_REGULATION_OF_PROTEIN_CATABOLIC_PROCESS	85	-0.949056	0.555149	0.975323
GO_CELL_PROJECTION_ASSEMBLY	202	-0.948868	0.584565	0.974695
GO_REGULATION_OF_APOPTOTIC_SIGNALING_PATHWAY	303	-0.948591	0.604835	0.974358
GO_CILIUM_ORGANIZATION	139	-0.948527	0.57201	0.97333
GO_REGULATION_OF_GASTRULATION	17	-0.94814	0.529132	0.973374
GO_CANONICAL_WNT_SIGNALING_PATHWAY	64	-0.947583	0.548448	0.973946
GO_CELL_REDOX_HOMEOSTASIS	56	-0.947398	0.547301	0.973319
GO_NEGATIVE_REGULATION_OF_PROTEIN_MODIFICATION_BY_SMALL_PROTEIN_CONJUGATION_OR_REMOVAL	123	-0.947157	0.563621	0.972873
GO_NEURON_MATURATION	20	-0.946874	0.530975	0.97256
REACTOME_M_G1_TRANSITION	75	-0.946329	0.553419	0.973112
REACTOME_TRAF6_MEDIATED_IRF7_ACTIVATION	17	-0.946205	0.535193	0.972291
GO_POSITIVE_REGULATION_OF_ERYTHROCYTE_DIFFERENTIATION	20	-0.945878	0.535597	0.972112
GO_ORGANELLE_TRANSPORT_ALONG_MICROTUBULE	48	-0.945464	0.54574	0.972232
GO_MUSCLE_CELL_DEVELOPMENT	59	-0.945237	0.549957	0.971742
GO_NEGATIVE_REGULATION_OF_DEFENSE_RESPONSE_TO_VIRUS	16	-0.944471	0.532968	0.973006
REACTOME_MITOTIC_PROMETAPHASE	73	-0.944103	0.560438	0.972986
GO_POSITIVE_REGULATION_OF_EXOCYTOSIS	53	-0.943517	0.55413	0.973679
GO_REGULATION_OF_SYSTEMIC_ARTERIAL_BLOOD_PRESSURE_MEDIATED_BY_A_CHEMICAL_SIGNAL	17	-0.94303	0.538132	0.97402
GO_NEGATIVE_REGULATION_OF_HYDROLASE_ACTIVITY	238	-0.942049	0.612204	0.975999
GO_LYSOSOMAL_TRANSPORT	62	-0.941859	0.555689	0.975394
GO_INTEGRIN_MEDIATED_SIGNALING_PATHWAY	65	-0.941832	0.559064	0.974265
GO_PROTEASOMAL_PROTEIN_CATABOLIC_PROCESS	246	-0.941302	0.612198	0.974765
REACTOME_INSULIN_RECEPTOR_SIGNALLING_CASCADE	60	-0.940511	0.559932	0.976089
GO_NEGATIVE_REGULATION_OF_PROTEOLYSIS	192	-0.940395	0.59886	0.975243
GO_NEGATIVE_REGULATION_OF_INTRINSIC_APOPTOTIC_SIGNALING_PATHWAY_IN_RESPONSE_TO_DNA_DAMAGE	22	-0.939847	0.544308	0.975806
REACTOME_CTLA4_INHIBITORY_SIGNALING	19	-0.939655	0.54484	0.975212
GO_NUCLEOTIDE_EXCISION_REPAIR_PREINCISION_COMPLEX_ASSEMBLY	28	-0.939535	0.549726	0.974394
REACTOME_DOWNREGULATION_OF_TGF_BETA_RECEPTOR_SIGNALING	21	-0.939329	0.543869	0.97387
GO_VACUOLAR_TRANSPORT	218	-0.939027	0.617776	0.973666
GO_REGULATION_OF_PLASMA_MEMBRANE_ORGANIZATION	52	-0.938691	0.554784	0.973549
GO_CAMP_MEDIATED_SIGNALING	17	-0.936702	0.549056	0.978728
REACTOME_DOWNSTREAM_SIGNALING_OF_ACTIVATED_FGFR	69	-0.936505	0.575578	0.978155
GO_AXIS_SPECIFICATION	45	-0.935593	0.56521	0.979873
REACTOME_DOUBLE_STRAND_BREAK_REPAIR	20	-0.935416	0.553371	0.979255
GO_POSITIVE_REGULATION_OF_LEUKOCYTE_APOPTOTIC_PROCESS	24	-0.934626	0.551929	0.980571
GO_PLACENTA_DEVELOPMENT	95	-0.934209	0.594094	0.980712
GO_PURINE_NUCLEOSIDE_BIOSYNTHETIC_PROCESS	73	-0.933692	0.57184	0.981161
GO_RETINOL_METABOLIC_PROCESS	18	-0.933649	0.548803	0.980103
REACTOME_MEIOTIC_RECOMBINATION	47	-0.933253	0.566978	0.980172
REACTOME_METABOLISM_OF_NON_CODING_RNA	47	-0.931107	0.570683	0.985853
GO_PANCREAS_DEVELOPMENT	34	-0.931101	0.563952	0.984671
GO_MYOFIBRIL_ASSEMBLY	22	-0.930257	0.560712	0.986163
GO_REGULATION_OF_GROWTH	430	-0.92985	0.685451	0.986267
GO_FATTY_ACID_TRANSPORT	35	-0.92927	0.56578	0.986918
GO_INNATE_IMMUNE_RESPONSE_ACTIVATING_CELL_SURFACE_RECEPTOR_SIGNALING_PATHWAY	98	-0.928373	0.599101	0.988543
GO_REGULATION_OF_PEPTIDE_SECRETION	117	-0.928101	0.611972	0.988205
GO_HETEROPHILIC_CELL_CELL_ADHESION_VIA_PLASMA_MEMBRANE_CELL_ADHESION_MOLECULES	20	-0.927745	0.564107	0.988135
GO_PROTEIN_DEGLYCOSYLATION	21	-0.927141	0.559593	0.988857
GO_EMBRYONIC_CRANIAL_SKELETON_MORPHOGENESIS	26	-0.926902	0.562199	0.988431
GO_REGULATION_OF_CELLULAR_PROTEIN_CATABOLIC_PROCESS	241	-0.925419	0.653077	0.991911
GO_POSITIVE_REGULATION_OF_CELL_CYCLE_G1_S_PHASE_TRANSITION	23	-0.925304	0.566017	0.991078
GO_ESTABLISHMENT_OF_MITOTIC_SPINDLE_LOCALIZATION	19	-0.924858	0.563693	0.991306
GO_SKELETAL_MUSCLE_TISSUE_REGENERATION	16	-0.924471	0.565321	0.99133
GO_REGULATION_OF_PROTEASOMAL_UBIQUITIN_DEPENDENT_PROTEIN_CATABOLIC_PROCESS	132	-0.924246	0.626849	0.990851
GO_COLUMNAR_CUBOIDAL_EPITHELIAL_CELL_DEVELOPMENT	32	-0.923161	0.571276	0.993019
GO_STEROID_HORMONE_MEDIATED_SIGNALING_PATHWAY	91	-0.922093	0.612748	0.995155
GO_CELL_SEPARATION_AFTER_CYTOKINESIS	15	-0.922012	0.562026	0.994222
GO_POTASSIUM_ION_IMPORT	16	-0.921234	0.570583	0.99547
GO_REGENERATION	102	-0.921206	0.615295	0.994366
GO_VESICLE_COATING	65	-0.920811	0.609209	0.994427
GO_MYD88_INDEPENDENT_TOLL_LIKE_RECEPTOR_SIGNALING_PATHWAY	29	-0.919232	0.575146	0.998128
GO_REGULATION_OF_NEUROLOGICAL_SYSTEM_PROCESS	31	-0.918862	0.581238	0.998089
REACTOME_TRNA_AMINOACYLATION	42	-0.917987	0.586275	0.999636
GO_POSITIVE_REGULATION_OF_CATION_TRANSMEMBRANE_TRANSPORT	55	-0.917763	0.604703	0.999142
GO_GRANULOCYTE_MIGRATION	49	-0.917757	0.600034	0.997978
GO_ORGANIC_ANION_TRANSPORT	224	-0.917499	0.671492	0.997603
GO_SINGLE_ORGANISM_MEMBRANE_FUSION	86	-0.916924	0.617721	0.998216
REACTOME_GLYCEROPHOSPHOLIPID_BIOSYNTHESIS	66	-0.916904	0.610996	0.997106
REACTOME_RIG_I_MDA5_MEDIATED_INDUCTION_OF_IFN_ALPHA_BETA_PATHWAYS	57	-0.916861	0.604493	0.996064
GO_GLYCOPROTEIN_METABOLIC_PROCESS	229	-0.916592	0.685305	0.99573
REACTOME_ACTIVATION_OF_NF_KAPPAB_IN_B_CELLS	59	-0.916317	0.605994	0.99541
GO_REGULATION_OF_TYPE_I_INTERFERON_MEDIATED_SIGNALING_PATHWAY	24	-0.916228	0.589063	0.994519
GO_SMAD_PROTEIN_SIGNAL_TRANSDUCTION	27	-0.915466	0.585469	0.995683
GO_REGULATION_OF_INTRACELLULAR_PROTEIN_TRANSPORT	294	-0.915229	0.703821	0.995235
GO_AMMONIUM_TRANSPORT	32	-0.914417	0.590675	0.996562
GO_HORMONE_TRANSPORT	44	-0.912671	0.60247	1
GO_GOLGI_TO_PLASMA_MEMBRANE_TRANSPORT	38	-0.911538	0.593467	1
GO_POSITIVE_REGULATION_OF_STEM_CELL_PROLIFERATION	32	-0.911035	0.595502	1
GO_STRIATED_MUSCLE_CELL_DIFFERENTIATION	88	-0.910802	0.642496	1
GO_REGULATION_OF_T_CELL_CYTOKINE_PRODUCTION	15	-0.910622	0.580236	1
GO_COLUMNAR_CUBOIDAL_EPITHELIAL_CELL_DIFFERENTIATION	61	-0.910447	0.610152	1
GO_TRANSITION_METAL_ION_TRANSPORT	75	-0.909961	0.63101	1
GO_NUCLEOSIDE_PHOSPHATE_BIOSYNTHETIC_PROCESS	142	-0.909808	0.664339	1
GO_ATP_DEPENDENT_CHROMATIN_REMODELING	57	-0.909677	0.616526	1
GO_MULTI_ORGANISM_BEHAVIOR	39	-0.909558	0.607333	0.999781
GO_DNA_DEALKYLATION	16	-0.908103	0.583029	1
GO_PIGMENT_GRANULE_ORGANIZATION	19	-0.908067	0.585923	1
GO_NEGATIVE_REGULATION_OF_ANION_TRANSPORT	20	-0.907517	0.586905	1
GO_POSITIVE_REGULATION_OF_REGULATED_SECRETORY_PATHWAY	30	-0.907516	0.599505	1
GO_CELLULAR_MODIFIED_AMINO_ACID_BIOSYNTHETIC_PROCESS	42	-0.90733	0.617724	1
GO_REGULATION_OF_MORPHOGENESIS_OF_A_BRANCHING_STRUCTURE	24	-0.906228	0.59458	1
GO_NEGATIVE_REGULATION_OF_DEPHOSPHORYLATION	56	-0.906208	0.617065	1
GO_CARDIAC_CHAMBER_MORPHOGENESIS	52	-0.906113	0.620954	1
GO_DNA_RECOMBINATION	168	-0.905834	0.682817	1
GO_WNT_SIGNALING_PATHWAY	261	-0.905049	0.726063	1
GO_SPINAL_CORD_DEVELOPMENT	47	-0.904642	0.618027	1
REACTOME_DAG_AND_IP3_SIGNALING	22	-0.90441	0.600806	1
GO_HORMONE_METABOLIC_PROCESS	83	-0.904358	0.652211	1
GO_POSITIVE_REGULATION_OF_ANION_TRANSPORT	34	-0.903755	0.609216	1
GO_REGULATION_OF_ADENYLATE_CYCLASE_ACTIVITY	31	-0.903242	0.601105	1
REACTOME_UNFOLDED_PROTEIN_RESPONSE	75	-0.90319	0.638451	1
GO_ANION_TRANSPORT	283	-0.902644	0.739837	1
GO_NEGATIVE_REGULATION_OF_PEPTIDASE_ACTIVITY	130	-0.902004	0.679686	1
GO_PORE_COMPLEX_ASSEMBLY	15	-0.901841	0.593285	1
REACTOME_HEMOSTASIS	307	-0.901744	0.741549	1
GO_INNER_MITOCHONDRIAL_MEMBRANE_ORGANIZATION	17	-0.901508	0.597844	0.99987
GO_POSITIVE_REGULATION_OF_HISTONE_METHYLATION	23	-0.899634	0.602033	1
REACTOME_SIGNALING_BY_FGFR	80	-0.899502	0.644898	1
GO_REGULATION_OF_MULTICELLULAR_ORGANISM_GROWTH	40	-0.898574	0.628531	1
GO_ENDOCYTIC_RECYCLING	24	-0.897951	0.607504	1
REACTOME_CIRCADIAN_REPRESSION_OF_EXPRESSION_BY_REV_ERBA	20	-0.897844	0.607558	1
GO_CARTILAGE_DEVELOPMENT	70	-0.897802	0.647614	1
GO_NEGATIVE_REGULATION_OF_RESPONSE_TO_ENDOPLASMIC_RETICULUM_STRESS	34	-0.897701	0.618037	1
GO_EXOCYTOSIS	197	-0.897278	0.721564	1
GO_RAS_PROTEIN_SIGNAL_TRANSDUCTION	119	-0.896513	0.689604	1
GO_RESPONSE_TO_BMP	43	-0.895087	0.636299	1
GO_MESONEPHRIC_TUBULE_MORPHOGENESIS	20	-0.894576	0.606459	1
GO_POSITIVE_REGULATION_OF_T_CELL_MEDIATED_IMMUNITY	27	-0.894287	0.614286	1
GO_ER_NUCLEUS_SIGNALING_PATHWAY	32	-0.894286	0.62366	1
REACTOME_NEGATIVE_REGULATION_OF_FGFR_SIGNALING	18	-0.893285	0.619218	1
GO_NEGATIVE_REGULATION_OF_PEPTIDE_SECRETION	28	-0.893103	0.623625	1
GO_POSITIVE_REGULATION_OF_CELLULAR_PROTEIN_LOCALIZATION	275	-0.892514	0.76253	1
GO_TELOMERE_MAINTENANCE_VIA_TELOMERE_LENGTHENING	21	-0.891935	0.61042	1
GO_REGULATION_OF_SYNAPTIC_PLASTICITY	78	-0.891893	0.672964	1
GO_CARBOHYDRATE_DERIVATIVE_TRANSPORT	37	-0.891002	0.633711	1
REACTOME_SIGNALING_BY_FGFR1_MUTANTS	21	-0.890919	0.62624	1
GO_ESTABLISHMENT_OR_MAINTENANCE_OF_EPITHELIAL_CELL_APICAL_BASAL_POLARITY	19	-0.890777	0.618251	1
GO_POSITIVE_REGULATION_OF_CHROMOSOME_ORGANIZATION	120	-0.89047	0.692784	1
REACTOME_SCFSKP2_MEDIATED_DEGRADATION_OF_P27_P21	51	-0.889513	0.654366	1
GO_POSITIVE_REGULATION_OF_TRANSFERASE_ACTIVITY	467	-0.888987	0.827876	1
GO_POSITIVE_REGULATION_OF_CHROMATIN_MODIFICATION	67	-0.888978	0.66304	1
GO_NUCLEOTIDE_EXCISION_REPAIR_DNA_DAMAGE_RECOGNITION	23	-0.888887	0.620956	1
GO_REGULATION_OF_LIPOPOLYSACCHARIDE_MEDIATED_SIGNALING_PATHWAY	17	-0.888395	0.617439	1
GO_REGULATION_OF_PROTEIN_MODIFICATION_BY_SMALL_PROTEIN_CONJUGATION_OR_REMOVAL	248	-0.887893	0.772671	1
GO_LYSOSOME_LOCALIZATION	16	-0.887782	0.609917	1
GO_INTRINSIC_APOPTOTIC_SIGNALING_PATHWAY	134	-0.887209	0.711736	1
GO_NEGATIVE_REGULATION_OF_CELLULAR_RESPONSE_TO_GROWTH_FACTOR_STIMULUS	77	-0.886931	0.671889	1
GO_CELLULAR_RESPONSE_TO_GLUCOSE_STARVATION	27	-0.886658	0.635621	1
GO_TELOMERE_CAPPING	22	-0.885315	0.617259	1
REACTOME_BOTULINUM_NEUROTOXICITY	15	-0.884912	0.613777	1
GO_SKELETAL_MUSCLE_CELL_DIFFERENTIATION	30	-0.884262	0.63375	1
GO_REGULATION_OF_NUCLEOTIDE_METABOLIC_PROCESS	113	-0.884186	0.709924	1
GO_GASTRULATION_WITH_MOUTH_FORMING_SECOND	17	-0.884022	0.620843	1
GO_MULTI_ORGANISM_MEMBRANE_ORGANIZATION	28	-0.883815	0.6305	1
GO_TISSUE_REMODELING	58	-0.883509	0.654439	1
GO_VESICLE_LOCALIZATION	161	-0.883107	0.737272	1
GO_REGULATION_OF_CELL_ADHESION_MEDIATED_BY_INTEGRIN	30	-0.882967	0.640849	1
REACTOME_CA_DEPENDENT_EVENTS	19	-0.88252	0.620728	1
GO_CORONARY_VASCULATURE_DEVELOPMENT	25	-0.882183	0.639543	1
GO_REGULATION_OF_RECEPTOR_RECYCLING	15	-0.881634	0.631741	1
GO_ESTABLISHMENT_OF_SPINDLE_ORIENTATION	20	-0.881604	0.626823	1
GO_REGULATION_OF_GLIOGENESIS	52	-0.881157	0.663692	1
REACTOME_AUTODEGRADATION_OF_THE_E3_UBIQUITIN_LIGASE_COP1	46	-0.881067	0.652841	1
GO_RIBOSOME_ASSEMBLY	48	-0.880545	0.664686	1
REACTOME_SIGNALING_BY_FGFR1_FUSION_MUTANTS	18	-0.879643	0.63581	1
GO_ORGANOPHOSPHATE_BIOSYNTHETIC_PROCESS	353	-0.879384	0.821486	1
GO_COGNITION	135	-0.879296	0.727392	1
GO_RIBOSOMAL_LARGE_SUBUNIT_ASSEMBLY	21	-0.878986	0.640768	1
GO_RNA_DEPENDENT_DNA_BIOSYNTHETIC_PROCESS	20	-0.878906	0.633044	1
GO_MEIOTIC_CELL_CYCLE	124	-0.878354	0.730048	1
GO_MITOCHONDRIAL_TRANSPORT	156	-0.878038	0.744528	1
GO_REGULATION_OF_PROTEASOMAL_PROTEIN_CATABOLIC_PROCESS	162	-0.877636	0.761912	1
GO_MITOCHONDRIAL_ATP_SYNTHESIS_COUPLED_PROTON_TRANSPORT	17	-0.877527	0.623536	1
GO_RESPONSE_TO_FUNGUS	28	-0.877442	0.639743	1
REACTOME_PROTEOLYTIC_CLEAVAGE_OF_SNARE_COMPLEX_PROTEINS	15	-0.876557	0.626781	1
GO_REGULATION_OF_CANONICAL_WNT_SIGNALING_PATHWAY	172	-0.875514	0.766172	1
GO_ORGANELLE_MEMBRANE_FUSION	63	-0.875402	0.680943	1
GO_REGULATION_OF_GLUCOSE_TRANSPORT	79	-0.875098	0.70148	1
GO_TRNA_METABOLIC_PROCESS	167	-0.874847	0.757566	1
REACTOME_SIGNALING_BY_NOTCH	86	-0.8732	0.713707	1
GO_NEGATIVE_REGULATION_OF_STRIATED_MUSCLE_CELL_DIFFERENTIATION	18	-0.870648	0.643101	1
GO_REGULATION_OF_PROTEIN_SERINE_THREONINE_KINASE_ACTIVITY	358	-0.870522	0.845445	1
GO_MANNOSYLATION	28	-0.870073	0.655086	1
GO_DNA_REPLICATION	176	-0.8694	0.77624	1
GO_REGULATION_OF_TOLL_LIKE_RECEPTOR_4_SIGNALING_PATHWAY	15	-0.868922	0.644984	1
GO_POSITIVE_REGULATION_OF_DNA_METABOLIC_PROCESS	140	-0.86812	0.768135	1
GO_FC_EPSILON_RECEPTOR_SIGNALING_PATHWAY	116	-0.86743	0.750575	1
GO_BRANCHING_INVOLVED_IN_MAMMARY_GLAND_DUCT_MORPHOGENESIS	15	-0.867075	0.642922	1
GO_REGULATION_OF_RNA_SPLICING	81	-0.866826	0.714455	1
GO_REGULATION_OF_CAMP_METABOLIC_PROCESS	59	-0.866732	0.699197	1
GO_MYELOID_CELL_DIFFERENTIATION	148	-0.866467	0.770381	1
GO_PROTEIN_TARGETING_TO_MEMBRANE	138	-0.866356	0.769023	1
GO_MACROMOLECULE_DEACYLATION	61	-0.865516	0.708762	1
GO_PYRIMIDINE_RIBONUCLEOSIDE_METABOLIC_PROCESS	23	-0.865445	0.65251	1
GO_REGULATION_OF_CELL_JUNCTION_ASSEMBLY	48	-0.864937	0.690017	1
GO_NEGATIVE_REGULATION_OF_EXOCYTOSIS	21	-0.864471	0.660617	1
REACTOME_PROCESSING_OF_CAPPED_INTRONLESS_PRE_MRNA	23	-0.864422	0.654856	1
GO_POSITIVE_REGULATION_OF_TRANSMEMBRANE_RECEPTOR_PROTEIN_SERINE_THREONINE_KINASE_SIGNALING_PATHWAY	59	-0.864208	0.700017	1
GO_REGULATION_OF_MITOCHONDRION_ORGANIZATION	180	-0.86389	0.795167	1
REACTOME_PURINE_METABOLISM	27	-0.862625	0.661574	1
GO_PATTERN_SPECIFICATION_PROCESS	211	-0.862476	0.811889	1
GO_POSITIVE_REGULATION_OF_GROWTH	158	-0.862291	0.786919	1
GO_HEMATOPOIETIC_PROGENITOR_CELL_DIFFERENTIATION	67	-0.862133	0.717914	1
GO_REGULATION_OF_ACTIN_FILAMENT_BASED_MOVEMENT	16	-0.861043	0.647719	1
GO_POSITIVE_REGULATION_OF_VIRAL_GENOME_REPLICATION	27	-0.859317	0.670052	1
GO_CARDIAC_CHAMBER_DEVELOPMENT	78	-0.858979	0.730532	1
REACTOME_SIGNALING_BY_TGF_BETA_RECEPTOR_COMPLEX	57	-0.858752	0.707913	1
GO__DE_NOVO_PROTEIN_FOLDING	19	-0.858726	0.659652	1
GO_INSULIN_RECEPTOR_SIGNALING_PATHWAY	64	-0.858386	0.719605	1
GO_SMOOTH_MUSCLE_CONTRACTION	21	-0.858089	0.662115	1
GO_ENDOCHONDRAL_BONE_MORPHOGENESIS	21	-0.857997	0.66709	1
GO_CARDIAC_VENTRICLE_DEVELOPMENT	57	-0.857258	0.715403	1
GO_RNA_MODIFICATION	108	-0.856647	0.769154	1
REACTOME_ASSEMBLY_OF_THE_PRE_REPLICATIVE_COMPLEX	61	-0.855232	0.72	1
REACTOME_APOPTOSIS	128	-0.85509	0.781542	1
GO_INTRACELLULAR_RECEPTOR_SIGNALING_PATHWAY	136	-0.854419	0.787666	1
GO_POSITIVE_REGULATION_OF_MITOTIC_NUCLEAR_DIVISION	36	-0.854242	0.69428	1
GO_CARDIAC_VENTRICLE_MORPHOGENESIS	29	-0.853444	0.680356	1
GO_ACTIVATION_OF_NF_KAPPAB_INDUCING_KINASE_ACTIVITY	16	-0.852901	0.65846	1
GO_MEMBRANE_DEPOLARIZATION	29	-0.852501	0.688643	1
GO_PURINE_CONTAINING_COMPOUND_CATABOLIC_PROCESS	39	-0.852495	0.697117	1
REACTOME_BASE_EXCISION_REPAIR	18	-0.852459	0.665628	1
GO_OXIDOREDUCTION_COENZYME_METABOLIC_PROCESS	85	-0.852042	0.752849	1
GO_MITOCHONDRION_LOCALIZATION	28	-0.851636	0.688427	1
GO_SMALL_GTPASE_MEDIATED_SIGNAL_TRANSDUCTION	280	-0.851382	0.864445	1
GO_CELL_SUBSTRATE_ADHERENS_JUNCTION_ASSEMBLY	15	-0.850998	0.6564	1
GO_LACTATION	28	-0.850826	0.689415	1
REACTOME_RORA_ACTIVATES_CIRCADIAN_EXPRESSION	21	-0.850755	0.672976	1
GO_POSITIVE_REGULATION_OF_G_PROTEIN_COUPLED_RECEPTOR_PROTEIN_SIGNALING_PATHWAY	15	-0.850579	0.661762	1
GO_LEUKOCYTE_HOMEOSTASIS	46	-0.850199	0.727494	1
GO_CELLULAR_PROTEIN_COMPLEX_ASSEMBLY	271	-0.85007	0.867486	1
GO_REGULATION_OF_WNT_SIGNALING_PATHWAY	222	-0.849265	0.846692	1
GO_CELLULAR_COMPONENT_DISASSEMBLY	409	-0.848934	0.910229	1
GO_EXTRINSIC_APOPTOTIC_SIGNALING_PATHWAY_VIA_DEATH_DOMAIN_RECEPTORS	37	-0.847803	0.697613	1
GO_REGULATION_OF_EARLY_ENDOSOME_TO_LATE_ENDOSOME_TRANSPORT	16	-0.847695	0.673511	1
GO_SPINDLE_CHECKPOINT	20	-0.847225	0.674427	1
GO_REGULATION_OF_CELLULAR_RESPONSE_TO_TRANSFORMING_GROWTH_FACTOR_BETA_STIMULUS	74	-0.846221	0.753812	1
GO_NUCLEOSIDE_MONOPHOSPHATE_METABOLIC_PROCESS	200	-0.846131	0.842947	1
GO_PIGMENT_METABOLIC_PROCESS	46	-0.845501	0.727927	1
GO_LIPID_BIOSYNTHETIC_PROCESS	387	-0.84507	0.919687	1
GO_BICELLULAR_TIGHT_JUNCTION_ASSEMBLY	17	-0.845003	0.670621	1
GO_FACE_DEVELOPMENT	36	-0.844821	0.709723	1
GO_TETRAPYRROLE_METABOLIC_PROCESS	43	-0.844772	0.721655	1
GO_REGULATION_OF_OLIGODENDROCYTE_DIFFERENTIATION	18	-0.844763	0.678015	1
GO_GLYCEROLIPID_BIOSYNTHETIC_PROCESS	161	-0.844307	0.823927	1
GO_REGULATION_OF_ASTROCYTE_DIFFERENTIATION	15	-0.844234	0.673822	1
GO_REGULATION_OF_PROTEIN_CATABOLIC_PROCESS	328	-0.844189	0.896858	1
GO_REGULATION_OF_VASCULAR_ENDOTHELIAL_GROWTH_FACTOR_PRODUCTION	21	-0.843324	0.68469	1
GO_ANDROGEN_RECEPTOR_SIGNALING_PATHWAY	36	-0.843314	0.703136	1
GO_NONMOTILE_PRIMARY_CILIUM_ASSEMBLY	21	-0.843207	0.684201	1
REACTOME_REGULATION_OF_INSULIN_SECRETION_BY_GLUCAGON_LIKE_PEPTIDE1	24	-0.84255	0.701292	1
GO_NEGATIVE_REGULATION_OF_STRESS_ACTIVATED_PROTEIN_KINASE_SIGNALING_CASCADE	33	-0.841914	0.711855	1
GO_REGULATION_OF_ALTERNATIVE_MRNA_SPLICING_VIA_SPLICEOSOME	28	-0.841768	0.702066	1
REACTOME_ANTIGEN_PROCESSING_UBIQUITINATION_PROTEASOME_DEGRADATION	178	-0.840523	0.850922	1
REACTOME_PEROXISOMAL_LIPID_METABOLISM	18	-0.840188	0.690959	1
GO_PHOSPHOLIPID_BIOSYNTHETIC_PROCESS	189	-0.839657	0.847135	1
GO_PROTEIN_ACYLATION	133	-0.839639	0.816707	1
GO_REGULATION_OF_INTRINSIC_APOPTOTIC_SIGNALING_PATHWAY_IN_RESPONSE_TO_DNA_DAMAGE	29	-0.839407	0.70812	1
GO_RHO_PROTEIN_SIGNAL_TRANSDUCTION	37	-0.837074	0.720339	1
GO_PYRIMIDINE_CONTAINING_COMPOUND_BIOSYNTHETIC_PROCESS	34	-0.836822	0.715741	1
REACTOME_GLUCOSE_TRANSPORT	32	-0.83682	0.711831	1
REACTOME_SIGNALING_BY_BMP	15	-0.836748	0.684038	1
GO_REGULATION_OF_CELLULAR_AMINE_METABOLIC_PROCESS	72	-0.836268	0.766746	1
GO_MEMBRANE_DEPOLARIZATION_DURING_ACTION_POTENTIAL	16	-0.835634	0.697287	1
GO_CEREBELLAR_PURKINJE_CELL_LAYER_DEVELOPMENT	16	-0.834879	0.685997	1
REACTOME_SCF_BETA_TRCP_MEDIATED_DEGRADATION_OF_EMI1	48	-0.834871	0.736302	1
GO_POSITIVE_REGULATION_OF_LIPID_CATABOLIC_PROCESS	15	-0.834556	0.68149	1
GO_REGULATION_OF_INTRACELLULAR_TRANSPORT	467	-0.833344	0.949328	1
REACTOME_INTRINSIC_PATHWAY_FOR_APOPTOSIS	29	-0.833282	0.715229	1
REACTOME_GOLGI_ASSOCIATED_VESICLE_BIOGENESIS	46	-0.833249	0.750043	1
GO_REGULATION_OF_NEURONAL_SYNAPTIC_PLASTICITY	26	-0.832775	0.715133	1
GO_STRIATED_MUSCLE_CONTRACTION	57	-0.831698	0.764333	1
GO_NUCLEAR_ENVELOPE_ORGANIZATION	74	-0.831103	0.780529	1
GO_NEGATIVE_REGULATION_OF_HEMATOPOIETIC_PROGENITOR_CELL_DIFFERENTIATION	15	-0.829944	0.698051	1
GO_LYMPHOCYTE_HOMEOSTASIS	41	-0.828964	0.741697	1
GO_POSITIVE_REGULATION_OF_GLIAL_CELL_DIFFERENTIATION	23	-0.827864	0.705434	1
GO_REGULATION_OF_BEHAVIOR	22	-0.827766	0.709701	1
REACTOME_TRIGLYCERIDE_BIOSYNTHESIS	34	-0.827168	0.734553	1
GO_REGULATION_OF_RESPONSE_TO_REACTIVE_OXYGEN_SPECIES	26	-0.825408	0.724824	1
GO_NEGATIVE_REGULATION_OF_TRANSLATIONAL_INITIATION	20	-0.824549	0.708515	1
GO_PH_REDUCTION	33	-0.824014	0.73687	1
GO_PYRIMIDINE_NUCLEOTIDE_BIOSYNTHETIC_PROCESS	24	-0.823948	0.725703	1
GO_VESICLE_TARGETING	69	-0.823454	0.790788	1
GO_NEGATIVE_REGULATION_OF_OXIDATIVE_STRESS_INDUCED_INTRINSIC_APOPTOTIC_SIGNALING_PATHWAY	18	-0.823312	0.710799	1
GO_THYMOCYTE_AGGREGATION	36	-0.823298	0.739915	1
GO_ORGANOPHOSPHATE_ESTER_TRANSPORT	65	-0.822664	0.787537	1
GO_MEIOTIC_CELL_CYCLE_PROCESS	103	-0.82261	0.825523	1
GO_INFLAMMATORY_RESPONSE_TO_ANTIGENIC_STIMULUS	17	-0.822423	0.707795	1
GO_DRUG_TRANSPORT	15	-0.82187	0.698851	1
GO_NEGATIVE_REGULATION_OF_BLOOD_VESSEL_ENDOTHELIAL_CELL_MIGRATION	16	-0.821712	0.709825	1
GO_SNRNA_PROCESSING	21	-0.82103	0.721989	1
GO_NEGATIVE_REGULATION_OF_MAPK_CASCADE	112	-0.819667	0.841421	1
GO_REGULATION_OF_ORGANELLE_ASSEMBLY	131	-0.81817	0.850032	1
GO_MUSCLE_CELL_DIFFERENTIATION	125	-0.816549	0.858256	1
REACTOME_DOWNREGULATION_OF_SMAD2_3_SMAD4_TRANSCRIPTIONAL_ACTIVITY	19	-0.816337	0.713062	1
REACTOME_APOPTOTIC_EXECUTION_PHASE	40	-0.815921	0.764665	1
GO_NUCLEAR_CHROMOSOME_SEGREGATION	177	-0.815854	0.889719	1
GO_RESPONSE_TO_EXOGENOUS_DSRNA	26	-0.8156	0.732339	1
GO_PROTEIN_POLYUBIQUITINATION	227	-0.815435	0.914923	1
GO_NEGATIVE_REGULATION_OF_AUTOPHAGY	46	-0.814846	0.770173	1
GO_VACUOLE_FUSION	22	-0.814193	0.725303	1
GO_POSITIVE_REGULATION_OF_ALPHA_BETA_T_CELL_PROLIFERATION	16	-0.813943	0.720203	1
REACTOME_RECRUITMENT_OF_MITOTIC_CENTROSOME_PROTEINS_AND_COMPLEXES	59	-0.813172	0.787557	1
GO_REGULATION_OF_NUCLEASE_ACTIVITY	22	-0.812895	0.721769	1
GO_NCRNA_CATABOLIC_PROCESS	18	-0.812835	0.721789	1
GO_PROTEIN_KINASE_C_ACTIVATING_G_PROTEIN_COUPLED_RECEPTOR_SIGNALING_PATHWAY	17	-0.811949	0.721998	1
REACTOME_ER_PHAGOSOME_PATHWAY	56	-0.811368	0.796913	1
GO_POSITIVE_REGULATION_OF_CHROMOSOME_SEGREGATION	24	-0.810451	0.741718	1
GO_ESTABLISHMENT_OF_LOCALIZATION_BY_MOVEMENT_ALONG_MICROTUBULE	78	-0.810385	0.819647	1
REACTOME_CDT1_ASSOCIATION_WITH_THE_CDC6_ORC_ORIGIN_COMPLEX	52	-0.810105	0.788161	1
GO_MEMBRANE_FUSION	110	-0.810025	0.857564	1
GO_MITOCHONDRIAL_RESPIRATORY_CHAIN_COMPLEX_ASSEMBLY	64	-0.809366	0.799139	1
REACTOME_CIRCADIAN_CLOCK	46	-0.80928	0.781207	1
REACTOME_SIGNALING_BY_FGFR_MUTANTS	27	-0.809249	0.750361	1
GO_REGULATION_OF_VASOCONSTRICTION	29	-0.807842	0.754616	1
GO_MUSCLE_FIBER_DEVELOPMENT	23	-0.807692	0.739255	1
REACTOME_INTEGRIN_ALPHAIIB_BETA3_SIGNALING	22	-0.807408	0.745507	1
GO_RIBONUCLEOSIDE_DIPHOSPHATE_METABOLIC_PROCESS	48	-0.807319	0.79273	1
GO_REGULATION_OF_POTASSIUM_ION_TRANSMEMBRANE_TRANSPORT	32	-0.807021	0.763522	1
GO_CELL_CYCLE_G2_M_PHASE_TRANSITION	122	-0.806866	0.86574	1
GO_NEGATIVE_REGULATION_OF_LIPID_TRANSPORT	17	-0.80652	0.725586	1
GO_CARDIAC_MUSCLE_CELL_ACTION_POTENTIAL	18	-0.80575	0.73917	1
GO_FATTY_ACYL_COA_METABOLIC_PROCESS	40	-0.8054	0.784801	1
GO_CEREBELLAR_CORTEX_MORPHOGENESIS	16	-0.805316	0.738643	1
REACTOME_PHOSPHOLIPASE_C_MEDIATED_CASCADE	26	-0.80433	0.760029	1
GO_NEGATIVE_REGULATION_OF_MAP_KINASE_ACTIVITY	58	-0.804072	0.803006	1
GO_CENTROSOME_LOCALIZATION	15	-0.803916	0.736322	1
GO_RRNA_CATABOLIC_PROCESS	15	-0.803613	0.732376	1
GO_EMBRYONIC_AXIS_SPECIFICATION	17	-0.803329	0.73885	1
GO_REGULATION_OF_HEART_RATE	42	-0.803327	0.784944	1
GO_SINGLE_ORGANISM_MEMBRANE_BUDDING	65	-0.801354	0.82371	1
GO_REGULATION_OF_VESICLE_FUSION	45	-0.80125	0.788732	1
GO_DNA_REPLICATION_INDEPENDENT_NUCLEOSOME_ORGANIZATION	41	-0.798476	0.788893	1
REACTOME_REGULATION_OF_ORNITHINE_DECARBOXYLASE_ODC	46	-0.797637	0.804457	1
REACTOME_MITOCHONDRIAL_PROTEIN_IMPORT	47	-0.797631	0.790967	1
GO_ATP_BIOSYNTHETIC_PROCESS	29	-0.797079	0.782826	1
GO_CELLULAR_ALDEHYDE_METABOLIC_PROCESS	67	-0.795731	0.828846	1
GO_FAT_CELL_DIFFERENTIATION	78	-0.795634	0.846851	1
REACTOME_PLATELET_AGGREGATION_PLUG_FORMATION	23	-0.795497	0.759781	1
GO_POSITIVE_REGULATION_OF_PROTEASOMAL_PROTEIN_CATABOLIC_PROCESS	93	-0.795268	0.860981	1
GO_NEUROBLAST_PROLIFERATION	15	-0.794739	0.740353	1
GO_RIBONUCLEOSIDE_TRIPHOSPHATE_BIOSYNTHETIC_PROCESS	39	-0.793999	0.792549	1
REACTOME_TRANSCRIPTIONAL_ACTIVITY_OF_SMAD2_SMAD3_SMAD4_HETEROTRIMER	34	-0.7925	0.785181	1
GO_REGULATION_OF_GENE_EXPRESSION_EPIGENETIC	173	-0.79234	0.923114	1
GO_PYRIMIDINE_NUCLEOSIDE_BIOSYNTHETIC_PROCESS	25	-0.792254	0.768828	1
GO_ERAD_PATHWAY	69	-0.792123	0.843332	1
GO_NEGATIVE_REGULATION_OF_PROTEIN_COMPLEX_ASSEMBLY	79	-0.7908	0.857481	1
REACTOME_CDK_MEDIATED_PHOSPHORYLATION_AND_REMOVAL_OF_CDC6	45	-0.789957	0.812718	1
GO_VESICLE_CYTOSKELETAL_TRAFFICKING	32	-0.789864	0.779446	1
GO_POSITIVE_REGULATION_OF_DNA_TEMPLATED_TRANSCRIPTION_INITIATION	20	-0.789676	0.764158	1
GO_CELLULAR_RESPONSE_TO_IONIZING_RADIATION	41	-0.789134	0.801739	1
GO_PROTEIN_ACETYLATION	106	-0.789125	0.884667	1
GO_PURINE_NUCLEOBASE_METABOLIC_PROCESS	17	-0.788426	0.748232	1
REACTOME_LOSS_OF_NLP_FROM_MITOTIC_CENTROSOMES	52	-0.786834	0.823438	1
GO_IMMUNOGLOBULIN_PRODUCTION	33	-0.78585	0.79386	1
GO_CYCLIC_NUCLEOTIDE_MEDIATED_SIGNALING	21	-0.785549	0.762933	1
GO_MAMMARY_GLAND_DEVELOPMENT	70	-0.783764	0.853331	1
GO_RESPONSE_TO_XENOBIOTIC_STIMULUS	56	-0.78346	0.839827	1
REACTOME_NEPHRIN_INTERACTIONS	15	-0.783102	0.756129	1
GO_CHROMOSOME_SEGREGATION	215	-0.783071	0.950384	1
GO_POSITIVE_REGULATION_OF_TYPE_I_INTERFERON_PRODUCTION	67	-0.782512	0.861901	1
GO_ACTIN_MYOSIN_FILAMENT_SLIDING	17	-0.782016	0.761827	1
GO_PROTEIN_IMPORT	132	-0.780883	0.917732	1
GO_HINDBRAIN_MORPHOGENESIS	20	-0.779471	0.779702	1
GO_AUTOPHAGOSOME_ORGANIZATION	38	-0.779447	0.815412	1
GO_REGULATION_OF_ADHERENS_JUNCTION_ORGANIZATION	36	-0.779411	0.812688	1
GO_REGULATION_OF_MRNA_SPLICING_VIA_SPLICEOSOME	52	-0.777057	0.837519	1
GO_TUMOR_NECROSIS_FACTOR_MEDIATED_SIGNALING_PATHWAY	102	-0.776636	0.893099	1
REACTOME_CLASS_I_MHC_MEDIATED_ANTIGEN_PROCESSING_PRESENTATION	212	-0.776362	0.955165	1
GO_POSITIVE_REGULATION_OF_CELLULAR_PROTEIN_CATABOLIC_PROCESS	171	-0.77491	0.942038	1
GO_PHOSPHATIDYLCHOLINE_BIOSYNTHETIC_PROCESS	17	-0.774557	0.772535	1
GO_REGULATION_OF_CELLULAR_PH	53	-0.774209	0.851079	1
GO_MITOCHONDRIAL_MEMBRANE_ORGANIZATION	87	-0.773422	0.893001	1
GO_NEURON_MIGRATION	47	-0.773175	0.833478	1
REACTOME_DESTABILIZATION_OF_MRNA_BY_AUF1_HNRNP_D0	49	-0.77303	0.839596	1
GO_BETA_CATENIN_TCF_COMPLEX_ASSEMBLY	31	-0.771236	0.808123	1
REACTOME_P53_INDEPENDENT_G1_S_DNA_DAMAGE_CHECKPOINT	46	-0.770234	0.838274	1
GO_GLUTAMATE_SECRETION	16	-0.770148	0.773007	1
GO_REGULATION_OF_TRANSLATION_IN_RESPONSE_TO_STRESS	19	-0.769327	0.78313	1
GO_PHAGOSOME_ACIDIFICATION	22	-0.768152	0.786664	1
GO_EMBRYONIC_HEART_TUBE_MORPHOGENESIS	35	-0.767952	0.822254	1
GO_SECRETORY_GRANULE_ORGANIZATION	19	-0.767926	0.785223	1
GO_METHYLATION	220	-0.766714	0.967782	1
GO_PHOSPHATIDIC_ACID_METABOLIC_PROCESS	24	-0.766638	0.8039	1
GO_CELL_AGING	55	-0.765178	0.862577	1
GO_MEMBRANE_LIPID_BIOSYNTHETIC_PROCESS	84	-0.764064	0.904899	1
GO_VENTRICULAR_CARDIAC_MUSCLE_TISSUE_DEVELOPMENT	21	-0.763937	0.803345	1
GO_CELLULAR_RESPONSE_TO_ESTROGEN_STIMULUS	26	-0.76238	0.817875	1
GO_MODULATION_BY_HOST_OF_VIRAL_PROCESS	16	-0.761563	0.781227	1
REACTOME_RNA_POL_I_RNA_POL_III_AND_MITOCHONDRIAL_TRANSCRIPTION	85	-0.761475	0.897029	1
GO_GLYCOSYL_COMPOUND_METABOLIC_PROCESS	296	-0.761188	0.987033	1
GO_MEMORY	51	-0.761018	0.866377	1
GO_INTRINSIC_APOPTOTIC_SIGNALING_PATHWAY_IN_RESPONSE_TO_DNA_DAMAGE_BY_P53_CLASS_MEDIATOR	28	-0.760443	0.815855	1
GO_NUCLEOBASE_CONTAINING_SMALL_MOLECULE_METABOLIC_PROCESS	414	-0.76044	0.994773	1
GO_DEFENSE_RESPONSE_TO_GRAM_POSITIVE_BACTERIUM	42	-0.760146	0.847853	1
GO_CELLULAR_PROTEIN_COMPLEX_LOCALIZATION	20	-0.759817	0.799964	1
GO_SUBSTANTIA_NIGRA_DEVELOPMENT	36	-0.759413	0.834623	1
GO_MAMMARY_GLAND_DUCT_MORPHOGENESIS	18	-0.758809	0.795001	1
GO_LIPID_STORAGE	21	-0.758359	0.800648	1
GO_CELLULAR_RESPONSE_TO_EPIDERMAL_GROWTH_FACTOR_STIMULUS	17	-0.758204	0.790372	1
GO_REGULATION_OF_CELLULAR_SENESCENCE	22	-0.758161	0.804455	1
GO_POSITIVE_REGULATION_OF_NUCLEASE_ACTIVITY	15	-0.755943	0.794485	1
GO_MITOCHONDRIAL_FUSION	17	-0.755709	0.799818	1
REACTOME_VIF_MEDIATED_DEGRADATION_OF_APOBEC3G	48	-0.754603	0.861436	1
GO_CYTOPLASMIC_SEQUESTERING_OF_TRANSCRIPTION_FACTOR	18	-0.754049	0.800254	1
GO_BIOMINERAL_TISSUE_DEVELOPMENT	37	-0.754002	0.846906	1
GO_REGULATION_OF_CARBOHYDRATE_CATABOLIC_PROCESS	31	-0.75376	0.827113	1
GO_APOPTOTIC_MITOCHONDRIAL_CHANGES	52	-0.753419	0.87738	1
GO_REGULATION_OF_FIBROBLAST_GROWTH_FACTOR_RECEPTOR_SIGNALING_PATHWAY	16	-0.753116	0.804167	1
GO_NIK_NF_KAPPAB_SIGNALING	80	-0.753088	0.90477	1
GO_PURINE_CONTAINING_COMPOUND_BIOSYNTHETIC_PROCESS	102	-0.752672	0.928796	1
GO_PROSTATE_GLAND_DEVELOPMENT	21	-0.752183	0.804896	1
GO_POSITIVE_REGULATION_OF_AXONOGENESIS	50	-0.75058	0.878947	1
GO_POSITIVE_REGULATION_OF_CELL_GROWTH	106	-0.750568	0.929043	1
GO_L_AMINO_ACID_TRANSPORT	40	-0.746924	0.863485	1
GO_REGULATION_OF_NUCLEOTIDE_CATABOLIC_PROCESS	27	-0.74592	0.832641	1
GO_REGULATION_OF_JUN_KINASE_ACTIVITY	65	-0.74574	0.900529	1
GO_NEURAL_NUCLEUS_DEVELOPMENT	44	-0.745195	0.866958	1
GO_TELOMERE_MAINTENANCE_VIA_TELOMERASE	16	-0.744863	0.807762	1
GO_GRANULOCYTE_ACTIVATION	18	-0.743726	0.821488	1
GO_PURINE_CONTAINING_COMPOUND_METABOLIC_PROCESS	296	-0.74372	0.992905	1
GO_ACTIN_FILAMENT_BASED_MOVEMENT	49	-0.743542	0.883536	1
GO_REGULATION_OF_POSTTRANSCRIPTIONAL_GENE_SILENCING	16	-0.743479	0.812131	1
GO_POSITIVE_REGULATION_OF_TELOMERE_MAINTENANCE	39	-0.742946	0.874163	1
GO_NEGATIVE_REGULATION_OF_NUCLEAR_DIVISION	33	-0.742682	0.858218	1
GO_MYELOID_LEUKOCYTE_MEDIATED_IMMUNITY	31	-0.742659	0.851359	1
GO_CEREBELLAR_CORTEX_DEVELOPMENT	28	-0.742127	0.846403	1
GO_REGULATION_OF_ERYTHROCYTE_DIFFERENTIATION	32	-0.741306	0.853031	1
GO_NEGATIVE_REGULATION_OF_EXTRINSIC_APOPTOTIC_SIGNALING_PATHWAY	74	-0.740775	0.917176	1
GO_POSITIVE_REGULATION_OF_MITOCHONDRION_ORGANIZATION	136	-0.739816	0.961507	1
REACTOME_NOTCH1_INTRACELLULAR_DOMAIN_REGULATES_TRANSCRIPTION	38	-0.739538	0.86362	1
GO_DNA_GEOMETRIC_CHANGE	72	-0.73942	0.914203	1
GO_PROTEIN_LOCALIZATION_TO_NUCLEUS	128	-0.737174	0.958848	1
GO_POLYOL_CATABOLIC_PROCESS	15	-0.737128	0.811366	1
REACTOME_REGULATION_OF_APOPTOSIS	53	-0.736743	0.90146	1
GO_NEGATIVE_REGULATION_OF_RESPONSE_TO_EXTRACELLULAR_STIMULUS	30	-0.736737	0.856463	1
GO_REGULATION_OF_MITOCHONDRIAL_OUTER_MEMBRANE_PERMEABILIZATION_INVOLVED_IN_APOPTOTIC_SIGNALING_PATHWAY	41	-0.736331	0.872488	1
GO_CELLULAR_RESPONSE_TO_PEPTIDE	186	-0.736331	0.980587	1
GO_POSITIVE_REGULATION_OF_TRANSLATIONAL_INITIATION	19	-0.735519	0.8343	1
GO_ER_ASSOCIATED_UBIQUITIN_DEPENDENT_PROTEIN_CATABOLIC_PROCESS	57	-0.735431	0.904721	1
GO_MATING	19	-0.734693	0.833759	1
REACTOME_SYNTHESIS_OF_PIPS_AT_THE_GOLGI_MEMBRANE	15	-0.734095	0.814646	1
REACTOME_TRANSPORT_OF_GLUCOSE_AND_OTHER_SUGARS_BILE_SALTS_AND_ORGANIC_ACIDS_METAL_IONS_AND_AMINE_COMPOUNDS	47	-0.733626	0.891431	1
GO_RESPONSE_TO_ELECTRICAL_STIMULUS	26	-0.73307	0.846502	1
GO_T_CELL_MEDIATED_IMMUNITY	22	-0.732885	0.840994	1
GO_ENDOPLASMIC_RETICULUM_TO_CYTOSOL_TRANSPORT	20	-0.732277	0.829321	1
GO_LIPID_TRANSLOCATION	16	-0.732137	0.823702	1
GO_RESPONSE_TO_AMPHETAMINE	19	-0.731507	0.831446	1
GO_REGULATION_OF_PROTEIN_LOCALIZATION_TO_CELL_SURFACE	21	-0.73039	0.83828	1
GO_PROTEIN_COMPLEX_LOCALIZATION	46	-0.729699	0.885168	1
GO_NEURON_DEATH	33	-0.729671	0.867901	1
GO_REGULATION_OF_TRANSCRIPTION_INITIATION_FROM_RNA_POLYMERASE_II_PROMOTER	19	-0.728383	0.841884	1
REACTOME_TGF_BETA_RECEPTOR_SIGNALING_ACTIVATES_SMADS	24	-0.728301	0.853698	1
REACTOME_PLATELET_HOMEOSTASIS	47	-0.727424	0.897837	1
REACTOME_ACTIVATION_OF_THE_PRE_REPLICATIVE_COMPLEX	28	-0.726681	0.861453	1
GO_GLYOXYLATE_METABOLIC_PROCESS	22	-0.725613	0.848626	1
GO_NUCLEOBASE_METABOLIC_PROCESS	34	-0.725457	0.878287	1
GO_POSITIVE_REGULATION_OF_MESENCHYMAL_CELL_PROLIFERATION	15	-0.724932	0.833905	1
GO_POSITIVE_REGULATION_OF_CELLULAR_RESPONSE_TO_TRANSFORMING_GROWTH_FACTOR_BETA_STIMULUS	21	-0.724506	0.847513	1
GO_HOMEOSTASIS_OF_NUMBER_OF_CELLS_WITHIN_A_TISSUE	22	-0.722284	0.859383	1
GO_RESPONSE_TO_NERVE_GROWTH_FACTOR	29	-0.721952	0.87212	1
GO_POSITIVE_REGULATION_OF_TISSUE_REMODELING	18	-0.720714	0.841855	1
REACTOME_TRAF6_MEDIATED_NFKB_ACTIVATION	19	-0.720033	0.848657	1
GO_MITOCHONDRIAL_GENOME_MAINTENANCE	20	-0.719912	0.85709	1
GO_SPINDLE_ASSEMBLY	61	-0.719226	0.923198	1
GO_DNA_REPLICATION_DEPENDENT_NUCLEOSOME_ORGANIZATION	19	-0.712901	0.858397	1
GO_NUCLEOSIDE_SALVAGE	15	-0.712327	0.842134	1
GO_PROTEIN_MANNOSYLATION	18	-0.711621	0.852015	1
GO_NEGATIVE_REGULATION_OF_TOR_SIGNALING	26	-0.708801	0.875834	1
GO_REGULATION_OF_MEMBRANE_PERMEABILITY	64	-0.708166	0.941952	1
GO_NEGATIVE_REGULATION_OF_CHROMOSOME_SEGREGATION	22	-0.705654	0.867271	1
GO_EMBRYONIC_CAMERA_TYPE_EYE_DEVELOPMENT	20	-0.704607	0.863406	1
GO_RESPONSE_TO_TOPOLOGICALLY_INCORRECT_PROTEIN	143	-0.704516	0.984012	1
GO_NUCLEOSIDE_DIPHOSPHATE_METABOLIC_PROCESS	60	-0.704492	0.93943	1
GO_REGULATION_OF_LIPID_CATABOLIC_PROCESS	34	-0.704099	0.895688	1
GO_REGULATION_OF_T_CELL_MEDIATED_IMMUNITY	43	-0.703819	0.920345	1
REACTOME_AMINO_ACID_AND_OLIGOPEPTIDE_SLC_TRANSPORTERS	28	-0.703483	0.8854	1
GO_NEUROMUSCULAR_JUNCTION_DEVELOPMENT	23	-0.703273	0.88018	1
GO_REGULATION_OF_ENDOTHELIAL_CELL_DIFFERENTIATION	19	-0.703271	0.868204	1
GO_REGULATION_OF_POTASSIUM_ION_TRANSPORT	41	-0.700202	0.920438	1
GO_PHOTOPERIODISM	20	-0.698747	0.873851	1
GO_POSITIVE_REGULATION_OF_MUSCLE_CELL_DIFFERENTIATION	49	-0.696764	0.928521	1
GO_CENTRIOLE_ASSEMBLY	17	-0.69578	0.868392	1
REACTOME_TRANS_GOLGI_NETWORK_VESICLE_BUDDING	53	-0.695545	0.934752	1
GO_BETA_CATENIN_DESTRUCTION_COMPLEX_DISASSEMBLY	16	-0.695076	0.86324	1
GO_INTERACTION_WITH_SYMBIONT	46	-0.693302	0.928795	1
GO_LIVER_REGENERATION	15	-0.692829	0.86663	1
GO_LONG_TERM_SYNAPTIC_POTENTIATION	19	-0.692055	0.883054	1
GO_ACTION_POTENTIAL	40	-0.689668	0.928359	1
REACTOME_CROSS_PRESENTATION_OF_SOLUBLE_EXOGENOUS_ANTIGENS_ENDOSOMES	44	-0.688896	0.92817	1
GO_PROTEIN_K11_LINKED_UBIQUITINATION	24	-0.687332	0.889797	1
GO_DNA_REPLICATION_INITIATION	26	-0.687267	0.895803	1
GO_REGULATION_OF_CATENIN_IMPORT_INTO_NUCLEUS	16	-0.68644	0.873799	1
GO_POSITIVE_REGULATION_OF_JUN_KINASE_ACTIVITY	52	-0.683285	0.94163	1
GO_NEGATIVE_REGULATION_OF_JNK_CASCADE	26	-0.681942	0.901716	1
GO_EMBRYONIC_DIGIT_MORPHOGENESIS	37	-0.681207	0.925368	1
GO_POSITIVE_REGULATION_OF_CATABOLIC_PROCESS	333	-0.680957	0.999852	1
GO_RESPONSE_TO_ENDOPLASMIC_RETICULUM_STRESS	207	-0.67874	0.998441	1
GO_RIBONUCLEOSIDE_CATABOLIC_PROCESS	20	-0.677603	0.889011	1
GO_POSITIVE_REGULATION_OF_RNA_SPLICING	20	-0.676148	0.890523	1
REACTOME_G_ALPHA_S_SIGNALLING_EVENTS	49	-0.676112	0.950423	1
GO_REGULATION_OF_RNA_STABILITY	127	-0.674507	0.987823	1
GO_NUCLEOTIDE_BINDING_DOMAIN_LEUCINE_RICH_REPEAT_CONTAINING_RECEPTOR_SIGNALING_PATHWAY	27	-0.673706	0.914482	1
GO_SPHINGOLIPID_BIOSYNTHETIC_PROCESS	51	-0.672964	0.954467	1
REACTOME_MITOCHONDRIAL_TRNA_AMINOACYLATION	21	-0.672831	0.897681	1
REACTOME_RESOLUTION_OF_AP_SITES_VIA_THE_MULTIPLE_NUCLEOTIDE_PATCH_REPLACEMENT_PATHWAY	16	-0.67262	0.890316	1
GO_HIPPO_SIGNALING	16	-0.671276	0.892993	1
GO_NEGATIVE_REGULATION_OF_ACTIN_FILAMENT_DEPOLYMERIZATION	25	-0.668318	0.91713	1
GO_AORTA_DEVELOPMENT	28	-0.667693	0.924861	1
GO_NEGATIVE_REGULATION_OF_DNA_BINDING	31	-0.666918	0.922738	1
GO_NEUTRAL_LIPID_BIOSYNTHETIC_PROCESS	24	-0.666714	0.912424	1
GO_AXO_DENDRITIC_TRANSPORT	26	-0.666234	0.917548	1
GO_QUINONE_METABOLIC_PROCESS	24	-0.666136	0.914402	1
GO_NEGATIVE_REGULATION_OF_MUSCLE_TISSUE_DEVELOPMENT	15	-0.664299	0.89503	1
GO_LIPOPROTEIN_BIOSYNTHETIC_PROCESS	72	-0.663887	0.978864	1
GO_PEROXISOMAL_TRANSPORT	16	-0.662751	0.896795	1
GO_REGULATION_OF_CARDIAC_MUSCLE_TISSUE_DEVELOPMENT	20	-0.661655	0.910864	1
GO_MITOCHONDRIAL_RESPIRATORY_CHAIN_COMPLEX_I_BIOGENESIS	51	-0.661486	0.957034	1
GO_CHONDROITIN_SULFATE_PROTEOGLYCAN_METABOLIC_PROCESS	27	-0.659615	0.926716	1
GO_REGULATION_OF_DEFENSE_RESPONSE_TO_VIRUS_BY_HOST	89	-0.659275	0.982949	1
REACTOME_PYRUVATE_METABOLISM_AND_CITRIC_ACID_TCA_CYCLE	39	-0.658957	0.953188	1
GO_NEGATIVE_REGULATION_OF_MACROAUTOPHAGY	21	-0.657987	0.915989	1
GO_PROTEIN_TRANSMEMBRANE_TRANSPORT	45	-0.657595	0.955765	1
GO_REGULATION_OF_ACTIN_FILAMENT_DEPOLYMERIZATION	36	-0.656967	0.943162	1
GO_REGULATION_OF_GLIAL_CELL_PROLIFERATION	18	-0.655767	0.913868	1
GO_UBIQUITIN_DEPENDENT_PROTEIN_CATABOLIC_PROCESS_VIA_THE_MULTIVESICULAR_BODY_SORTING_PATHWAY	16	-0.655527	0.903581	1
GO_SOMITOGENESIS	36	-0.655319	0.94971	1
GO_EMBRYONIC_PLACENTA_DEVELOPMENT	54	-0.654207	0.966116	1
GO_POSITIVE_REGULATION_OF_TOLL_LIKE_RECEPTOR_SIGNALING_PATHWAY	18	-0.65353	0.911362	1
REACTOME_CELL_CELL_JUNCTION_ORGANIZATION	21	-0.652374	0.921053	1
GO_REGULATION_OF_PROTEIN_HOMODIMERIZATION_ACTIVITY	19	-0.652278	0.915542	1
GO_REGULATION_OF_T_CELL_MEDIATED_CYTOTOXICITY	21	-0.650431	0.917643	1
GO_RESPONSE_TO_PROGESTERONE	37	-0.64982	0.954167	1
GO_REGULATION_OF_ESTABLISHMENT_OF_PROTEIN_LOCALIZATION_TO_MITOCHONDRION	106	-0.648679	0.992363	1
GO_MACROMOLECULE_METHYLATION	161	-0.645478	0.999023	1
GO_GPI_ANCHOR_METABOLIC_PROCESS	30	-0.645127	0.942636	1
GO_SOMATIC_RECOMBINATION_OF_IMMUNOGLOBULIN_GENE_SEGMENTS	17	-0.642976	0.916484	1
GO_POSITIVE_REGULATION_OF_GENE_EXPRESSION_EPIGENETIC	57	-0.642366	0.971846	1
GO_REPRODUCTIVE_BEHAVIOR	16	-0.641321	0.915523	1
GO_CELL_DEATH_IN_RESPONSE_TO_OXIDATIVE_STRESS	17	-0.641109	0.915953	1
GO_HIPPOCAMPUS_DEVELOPMENT	40	-0.636958	0.964049	1
REACTOME_REGULATION_OF_MRNA_STABILITY_BY_PROTEINS_THAT_BIND_AU_RICH_ELEMENTS	80	-0.636215	0.988322	1
REACTOME_AMINO_ACID_TRANSPORT_ACROSS_THE_PLASMA_MEMBRANE	20	-0.635811	0.925365	1
GO_HEPATICOBILIARY_SYSTEM_DEVELOPMENT	93	-0.635621	0.992875	1
GO_REGULATION_OF_GENE_SILENCING	36	-0.634661	0.954842	1
GO_REGULATION_OF_TUMOR_NECROSIS_FACTOR_MEDIATED_SIGNALING_PATHWAY	43	-0.633337	0.96617	1
GO_AUTOPHAGY	308	-0.630793	0.999851	1
GO_MYOTUBE_DIFFERENTIATION	25	-0.629023	0.941937	1
GO_REGULATION_OF_CELL_AGING	28	-0.628875	0.950099	1
REACTOME_RNA_POL_I_TRANSCRIPTION_TERMINATION	18	-0.625528	0.933561	1
REACTOME_SYNTHESIS_OF_PA	19	-0.624303	0.932932	1
GO_ARTERY_MORPHOGENESIS	29	-0.623941	0.957084	1
GO_PHOSPHATIDYLINOSITOL_DEPHOSPHORYLATION	19	-0.623512	0.931581	1
GO_CELLULAR_RESPONSE_TO_GLUCAGON_STIMULUS	20	-0.620206	0.941723	1
REACTOME_GLUCAGON_SIGNALING_IN_METABOLIC_REGULATION	20	-0.619106	0.945595	1
GO_MACROAUTOPHAGY	209	-0.618575	0.999844	1
GO_CELLULAR_RESPONSE_TO_CAMP	30	-0.617174	0.960654	1
REACTOME_RNA_POL_III_TRANSCRIPTION_TERMINATION	16	-0.616309	0.933098	1
REACTOME_SIGNALING_BY_NOTCH1	58	-0.616128	0.983933	1
GO_REGULATION_OF_VACUOLAR_TRANSPORT	26	-0.614847	0.952372	1
REACTOME_RNA_POL_III_CHAIN_ELONGATION	15	-0.613818	0.937131	1
GO_COENZYME_A_METABOLIC_PROCESS	16	-0.613664	0.93169	1
GO_SOMATIC_CELL_DNA_RECOMBINATION	25	-0.61242	0.954545	1
GO_NUCLEOSIDE_TRIPHOSPHATE_METABOLIC_PROCESS	187	-0.610923	0.999686	1
GO_VESICLE_DOCKING_INVOLVED_IN_EXOCYTOSIS	27	-0.608186	0.963266	1
GO_MAINTENANCE_OF_PROTEIN_LOCALIZATION_IN_ORGANELLE	25	-0.607712	0.958042	1
REACTOME_RECYCLING_PATHWAY_OF_L1	24	-0.607279	0.952045	1
GO_CYTOPLASMIC_SEQUESTERING_OF_PROTEIN	35	-0.606418	0.971221	1
GO_GOLGI_TO_PLASMA_MEMBRANE_PROTEIN_TRANSPORT	24	-0.604349	0.958102	1
GO_RESPONSE_TO_COCAINE	26	-0.60407	0.961843	1
GO_XENOPHAGY	66	-0.603313	0.991926	1
REACTOME_DARPP_32_EVENTS	21	-0.59942	0.950769	1
REACTOME_NOD1_2_SIGNALING_PATHWAY	28	-0.5994	0.968299	1
REACTOME_EFFECTS_OF_PIP2_HYDROLYSIS	15	-0.595671	0.940959	1
GO_POSITIVE_REGULATION_OF_MICROTUBULE_POLYMERIZATION	16	-0.593702	0.952487	1
GO_BODY_FLUID_SECRETION	42	-0.593449	0.983009	1
REACTOME_RNA_POL_III_TRANSCRIPTION_INITIATION_FROM_TYPE_3_PROMOTER	24	-0.593158	0.960664	1
GO_REGULATION_OF_DNA_RECOMBINATION	41	-0.591587	0.984688	1
REACTOME_METAL_ION_SLC_TRANSPORTERS	17	-0.59152	0.953547	1
GO_POSITIVE_REGULATION_OF_NIK_NF_KAPPAB_SIGNALING	28	-0.58016	0.978898	1
REACTOME_RNA_POL_I_TRANSCRIPTION_INITIATION	21	-0.580144	0.964731	1
GO_REGULATION_OF_TRANSLATIONAL_ELONGATION	22	-0.579907	0.966157	1
GO_OXIDATIVE_PHOSPHORYLATION	79	-0.57835	0.996724	1
GO_ZINC_II_ION_TRANSPORT	20	-0.577877	0.964215	1
GO_POSITIVE_REGULATION_OF_AUTOPHAGY	69	-0.574825	0.996362	1
GO_REGULATION_OF_INTRACELLULAR_ESTROGEN_RECEPTOR_SIGNALING_PATHWAY	22	-0.574639	0.971554	1
REACTOME_RNA_POL_III_TRANSCRIPTION	30	-0.573682	0.978056	1
GO_NEURON_APOPTOTIC_PROCESS	26	-0.572542	0.977456	1
GO_RESPIRATORY_GASEOUS_EXCHANGE	32	-0.569964	0.980904	1
REACTOME_RNA_POL_III_TRANSCRIPTION_INITIATION_FROM_TYPE_2_PROMOTER	21	-0.568525	0.976816	1
GO_RETROGRADE_VESICLE_MEDIATED_TRANSPORT_GOLGI_TO_ER	64	-0.567667	0.995847	1
GO_SEGMENTATION	52	-0.566295	0.99393	1
GO_ORGANELLE_DISASSEMBLY	138	-0.561932	0.999515	1
REACTOME_TCA_CYCLE_AND_RESPIRATORY_ELECTRON_TRANSPORT	113	-0.559409	1	1
GO_OLIGOSACCHARIDE_METABOLIC_PROCESS	48	-0.557066	0.993243	1
GO_REGULATION_OF_CHROMATIN_BINDING	15	-0.556204	0.964259	1
GO_MAMMARY_GLAND_EPITHELIUM_DEVELOPMENT	33	-0.556103	0.986177	1
GO_REGULATION_OF_CELL_CYCLE_CHECKPOINT	23	-0.555117	0.976096	1
REACTOME_SPHINGOLIPID_DE_NOVO_BIOSYNTHESIS	24	-0.552357	0.98133	1
GO_SOMATIC_DIVERSIFICATION_OF_IMMUNE_RECEPTORS	31	-0.552214	0.987562	1
GO_REGULATION_OF_CYTOKINE_PRODUCTION_INVOLVED_IN_INFLAMMATORY_RESPONSE	15	-0.546791	0.97126	1
GO_MITOCHONDRIAL_TRANSMEMBRANE_TRANSPORT	51	-0.538766	0.996875	1
GO_APICAL_JUNCTION_ASSEMBLY	24	-0.536812	0.985652	1
GO_NEGATIVE_REGULATION_OF_MITOTIC_NUCLEAR_DIVISION	26	-0.534396	0.988301	1
GO_NEGATIVE_REGULATION_OF_BLOOD_CIRCULATION	21	-0.530557	0.986423	1
GO_NCRNA_3_END_PROCESSING	20	-0.522797	0.985521	1
GO_REGULATION_OF_TELOMERE_MAINTENANCE	59	-0.520285	0.999141	1
GO_REGULATION_OF_CHROMATIN_SILENCING	16	-0.517396	0.981621	1
GO_REGULATION_OF_MUSCLE_HYPERTROPHY	25	-0.516671	0.990759	1
REACTOME_SMAD2_SMAD3_SMAD4_HETEROTRIMER_REGULATES_TRANSCRIPTION	23	-0.513841	0.98852	1
GO_DEOXYRIBONUCLEOSIDE_TRIPHOSPHATE_METABOLIC_PROCESS	16	-0.502646	0.985365	1
GO_PROTEIN_LOCALIZATION_TO_GOLGI_APPARATUS	24	-0.502042	0.989678	1
GO_REGULATION_OF_TRANSCRIPTION_REGULATORY_REGION_DNA_BINDING	22	-0.495666	0.991595	1
GO_POSITIVE_REGULATION_OF_CARBOHYDRATE_METABOLIC_PROCESS	48	-0.494159	0.999125	1
GO_CELLULAR_RESPONSE_TO_INTERLEUKIN_6	16	-0.491944	0.98951	1
GO_RESPONSE_TO_INTERLEUKIN_6	18	-0.465895	0.994541	1
GO_ASPARTATE_FAMILY_AMINO_ACID_BIOSYNTHETIC_PROCESS	19	-0.4605	0.995841	1
GO_PHAGOSOME_MATURATION	31	-0.460192	0.998582	1
GO_POSITIVE_REGULATION_OF_TELOMERE_MAINTENANCE_VIA_TELOMERE_LENGTHENING	28	-0.452511	0.998398	0.999908
GO_NEGATIVE_REGULATION_OF_TELOMERE_MAINTENANCE	25	-0.393979	1	1
GO_ESTABLISHMENT_OF_PROTEIN_LOCALIZATION_TO_VACUOLE	30	-0.386231	0.999468	0.999799
