# Supplementary material for: Single cell analysis reveals human cytomegalovirus drives latently infected cells towards an anergic-like monocyte state
Source: eLife. 2020 Jan 22;9:e52168. doi: 10.7554/eLife.52168 (PMC7039680; doi:10.7554/eLife.52168)
Supplement: Supplementary file 1. [file elife-52168-supp1.xlsx]

## Sheet: Table S2
Supplementary file 1: ddPCR results of CD14+ monocytes from 7 donors
The table shows: donor number (Donor), donor HCMV status (Status), normalized HCMV probe postitive events in the different replicates and total in each donor, normalized host probe postitive events in the different replicates and total in each donor
		CMV probe							Host probe/2 (=cell#)
		Replicate							Replicate
Donor	Status	#1	#2	#3	#4	#5	#6	Total # of copies	#1	#2	#3	#4	#5	#6	Total # of cells
1	Pos	0						0	71300						71300
2	Pos	2.4						2.4	49900						49900
3	Pos	0	0	1.2	0			1.2	27500	28100	80900	107000			243500
4	Pos	0	0					0	26200	26000					52200
5-1st run	Pos	1.2	0					1.2	53000	51900					104900
5-2nd run	Pos	0	0	0	0	0	0	0	49100	51800	49300	50300	49900	50200	300600
6	Pos	0	0					0	50600	48100					98700
7	Pos	0	1.4	0				1.4	56800	18680	24880				100360
