# Supplementary material for: Single cell analysis reveals human cytomegalovirus drives latently infected cells towards an anergic-like monocyte state
Source: eLife. 2020 Jan 22;9:e52168. doi: 10.7554/eLife.52168 (PMC7039680; doi:10.7554/eLife.52168)
Supplement: Supplementary file 2. [file elife-52168-supp2.xlsx]

## Sheet: Table S5
Supplementary file 2- Correlation coefficients between CD74high enriched pathway (Fig. 6B) and total HCMV transcript level across single infected CD14+ monocytes
Pathway name	cor_value
GO_HUMORAL_IMMUNE_RESPONSE_MEDIATED_BY_CIRCULATING_IMMUNOGLOBULIN_rel.exp.mean	-0.353927
GO_ADAPTIVE_IMMUNE_RESPONSE_rel.exp.mean	-0.5321
GO_POSITIVE_T_CELL_SELECTION_rel.exp.mean	-0.309501
REACTOME_PD1_SIGNALING_rel.exp.mean	-0.468982
GO_REGULATION_OF_ANTIGEN_RECEPTOR_MEDIATED_SIGNALING_PATHWAY_rel.exp.mean	-0.204713
GO_CELLULAR_RESPONSE_TO_INTERFERON_GAMMA_rel.exp.mean	-0.544326
GO_REGULATION_OF_LEUKOCYTE_PROLIFERATION_rel.exp.mean	-0.489751
GO_POSITIVE_REGULATION_OF_PHOSPHATASE_ACTIVITY_rel.exp.mean	-0.164637
GO_POSITIVE_REGULATION_OF_SMOOTH_MUSCLE_CELL_MIGRATION_rel.exp.mean	-0.24083
GO_LYMPHOCYTE_COSTIMULATION_rel.exp.mean	-0.505091
GO_B_CELL_RECEPTOR_SIGNALING_PATHWAY_rel.exp.mean	-0.299595
GO_REGULATION_OF_CELL_CELL_ADHESION_rel.exp.mean	-0.513632
GO_REGULATION_OF_CELL_ACTIVATION_rel.exp.mean	-0.507338
GO_REGULATION_OF_CALCIUM_ION_TRANSPORT_rel.exp.mean	-0.411241
GO_POSITIVE_REGULATION_OF_ERK1_AND_ERK2_CASCADE_rel.exp.mean	-0.26147
GO_HUMORAL_IMMUNE_RESPONSE_rel.exp.mean	-0.376116
GO_REGULATION_OF_CYTOKINE_SECRETION_rel.exp.mean	-0.393277
GO_VITAMIN_TRANSPORT_rel.exp.mean	-0.152577
REACTOME_GENERATION_OF_SECOND_MESSENGER_MOLECULES_rel.exp.mean	-0.484579
REACTOME_NCAM1_INTERACTIONS_rel.exp.mean	-0.058893
REACTOME_HIV_LIFE_CYCLE_rel.exp.mean	-0.144377
REACTOME_G1_PHASE_rel.exp.mean	-0.00389911
REACTOME_RNA_POL_II_PRE_TRANSCRIPTION_EVENTS_rel.exp.mean	-0.0423548
