# Supplementary figures and images for: Single cell analysis reveals human cytomegalovirus drives latently infected cells towards an anergic-like monocyte state
Source: eLife journal article supplement (doi:10.7554/elife.52168), 2020-01-22

Figure 1- figure supplement 1

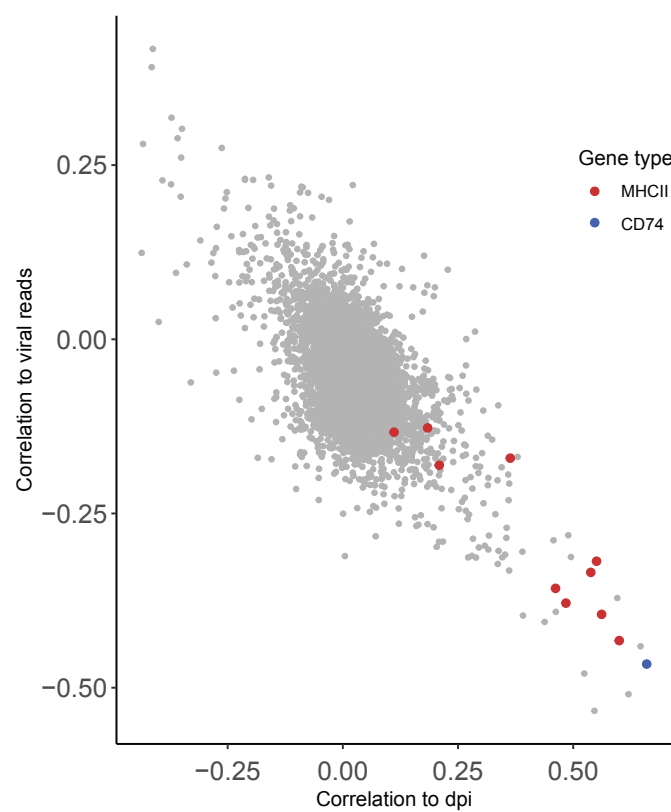

Supplement: supp [file elife_poa_e52168_Figure_1_figure_supplement_1.pdf › elife_poa_e52168_Figure_1_figure_supplement_1.pdf]

Figure 1- figure supplement 2

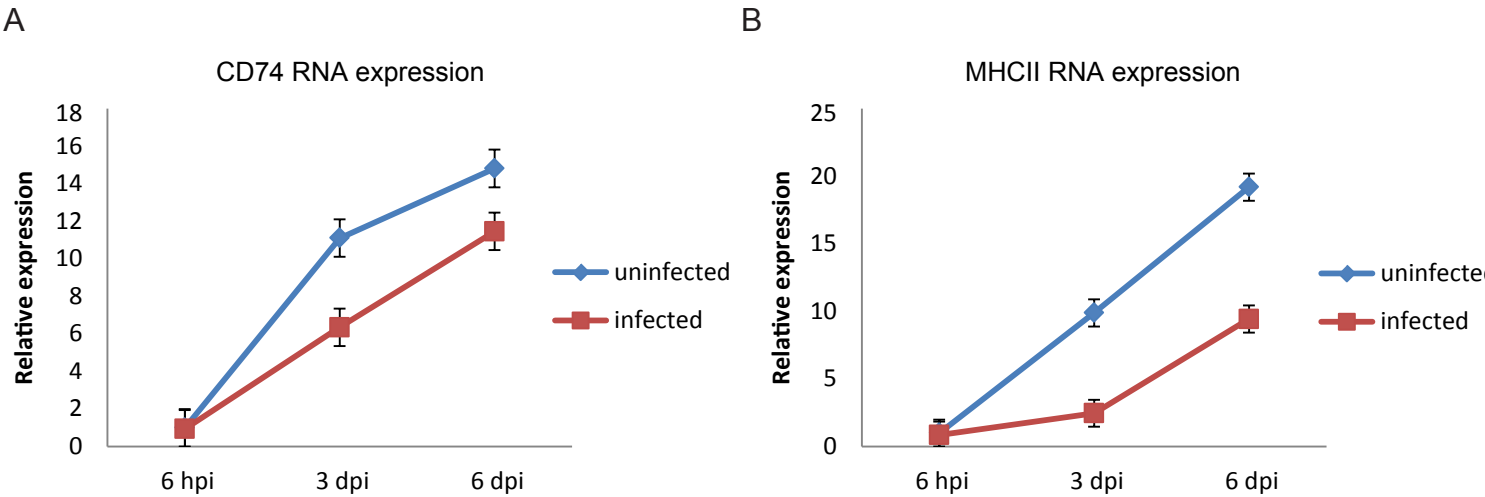

Supplement: supp [file elife_poa_e52168_Figure_1_figure_supplement_2.pdf › elife_poa_e52168_Figure_1_figure_supplement_2.pdf]

Figure 2- figure supplement 1

A

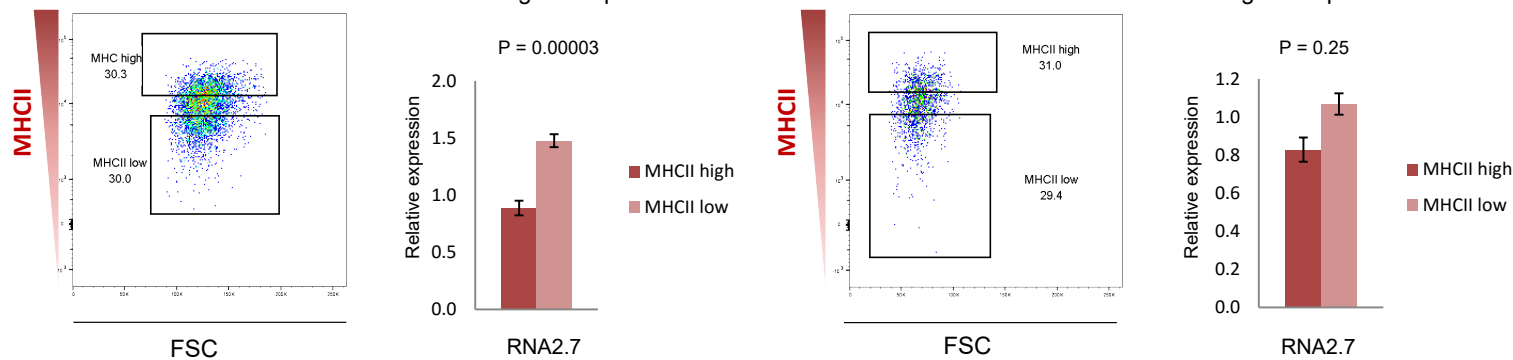

B

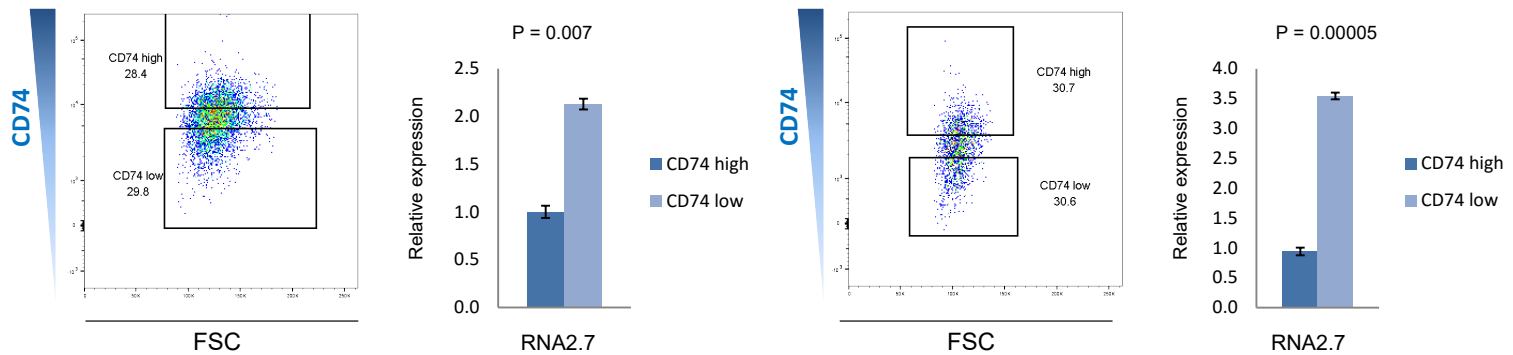

Supplement: supp [file elife_poa_e52168_Figure_2_figure_supplement_1.pdf › elife_poa_e52168_Figure_2_figure_supplement_1.pdf]

Figure 2- figure supplement 2

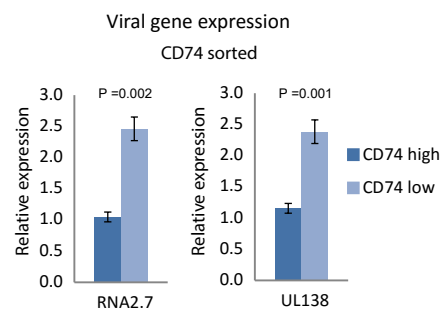

Supplement: supp [file elife_poa_e52168_Figure_2_figure_supplement_2.pdf › elife_poa_e52168_Figure_2_figure_supplement_2.pdf]

Figure 2- figure supplement 3

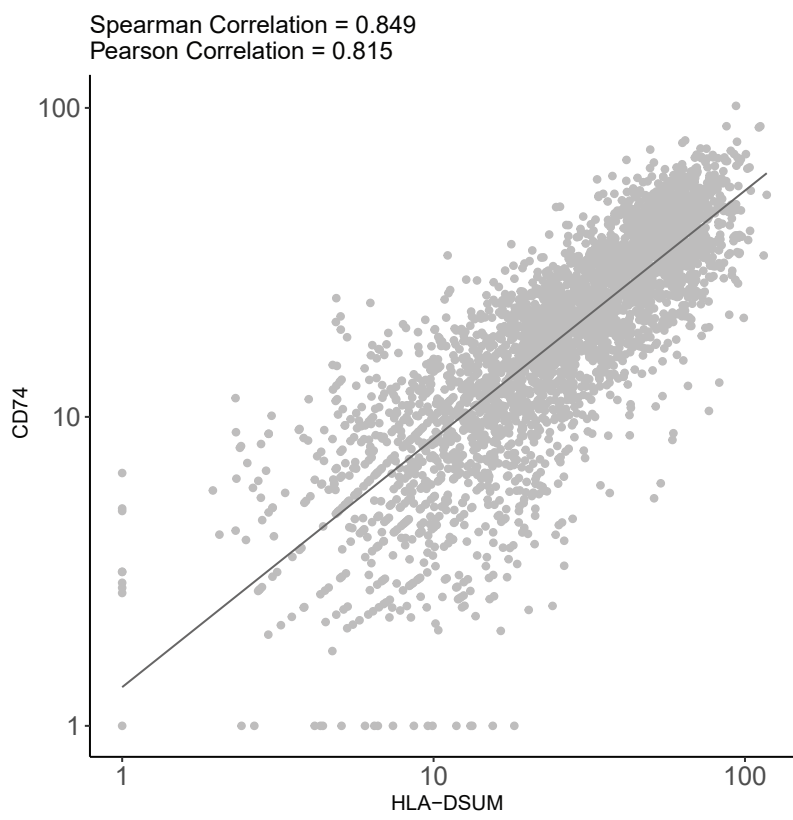

Supplement: supp [file elife_poa_e52168_Figure_2_figure_supplement_3.pdf › elife_poa_e52168_Figure_2_figure_supplement_3.pdf]

Figure 2- figure supplement 4

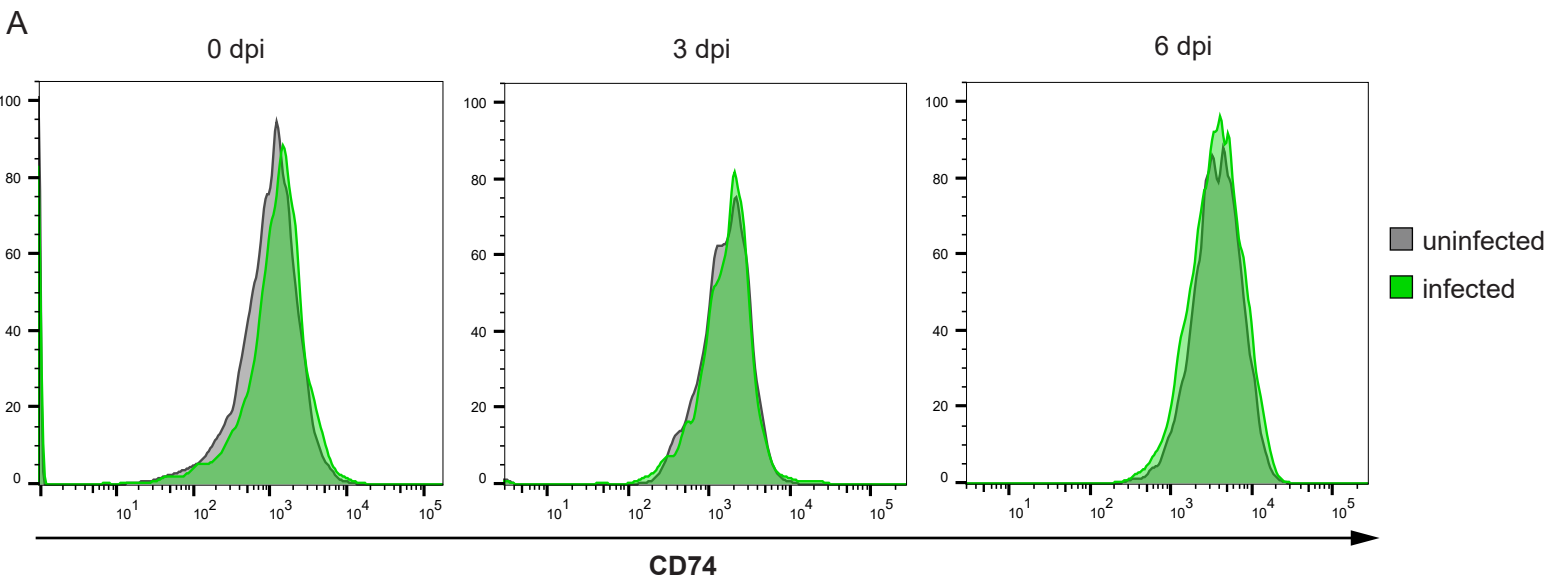

Supplement: supp [file elife_poa_e52168_Figure_2_figure_supplement_4.pdf › elife_poa_e52168_Figure_2_figure_supplement_4.pdf]

Figure 5- figure supplement 1

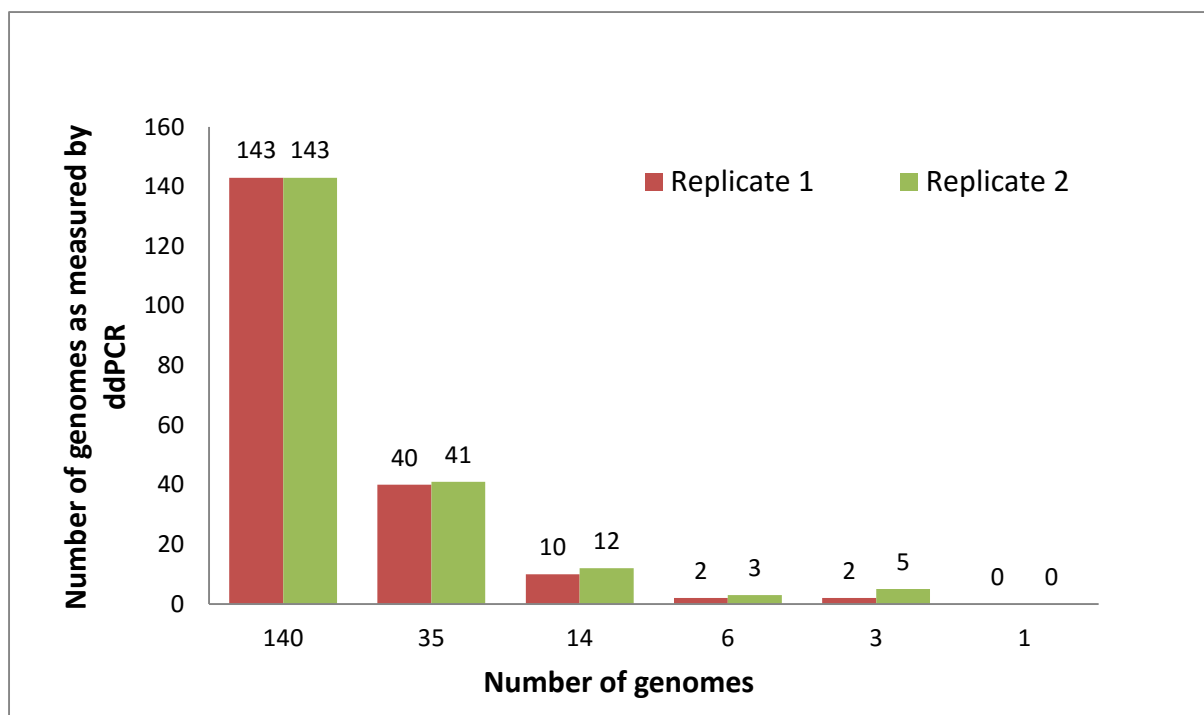

Supplement: supp [file elife_poa_e52168_Figure_5_figure_supplement_1.pdf › elife_poa_e52168_Figure_5_figure_supplement_1.pdf]

Figure 5- figure supplement 2

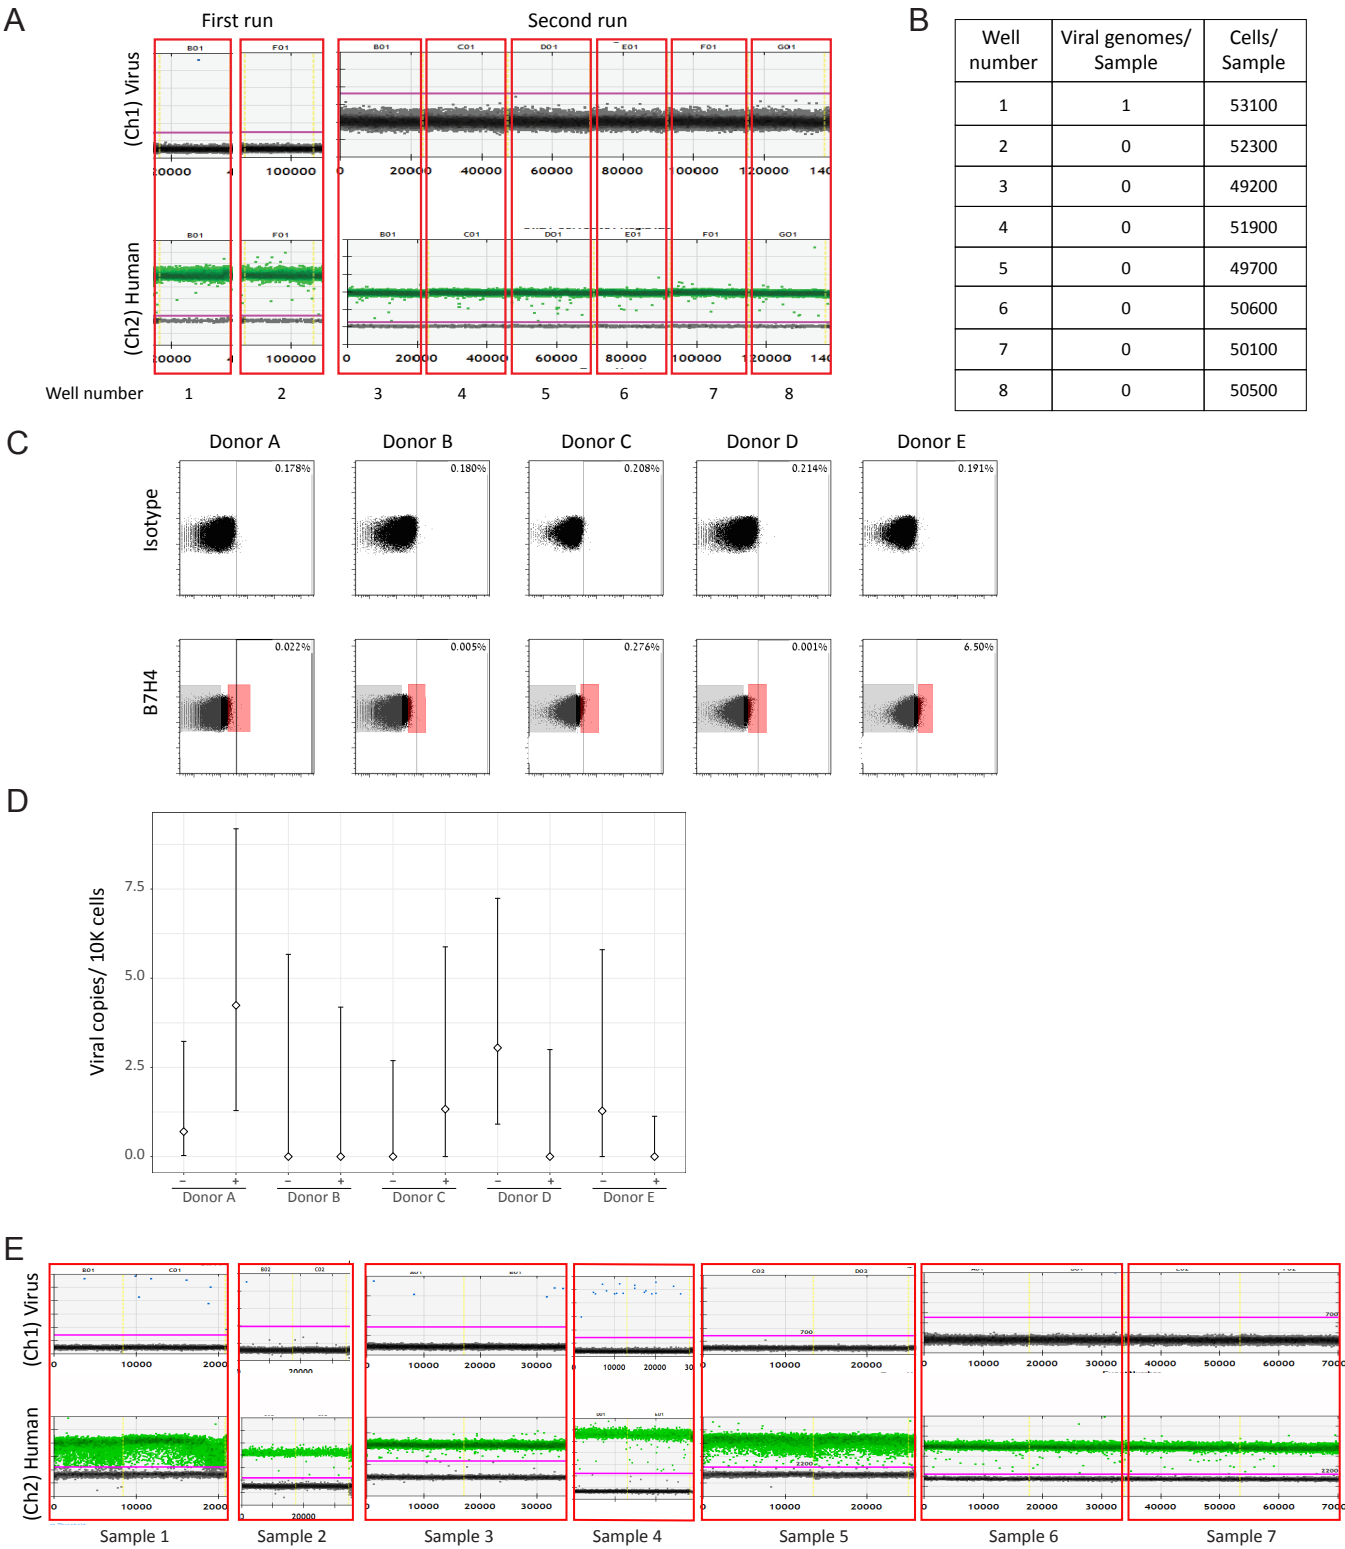

Supplement: supp [file elife_poa_e52168_Figure_5_figure_supplement_2.pdf › elife_poa_e52168_Figure_5_figure_supplement_2.pdf]

Figure 6- figure supplement 1

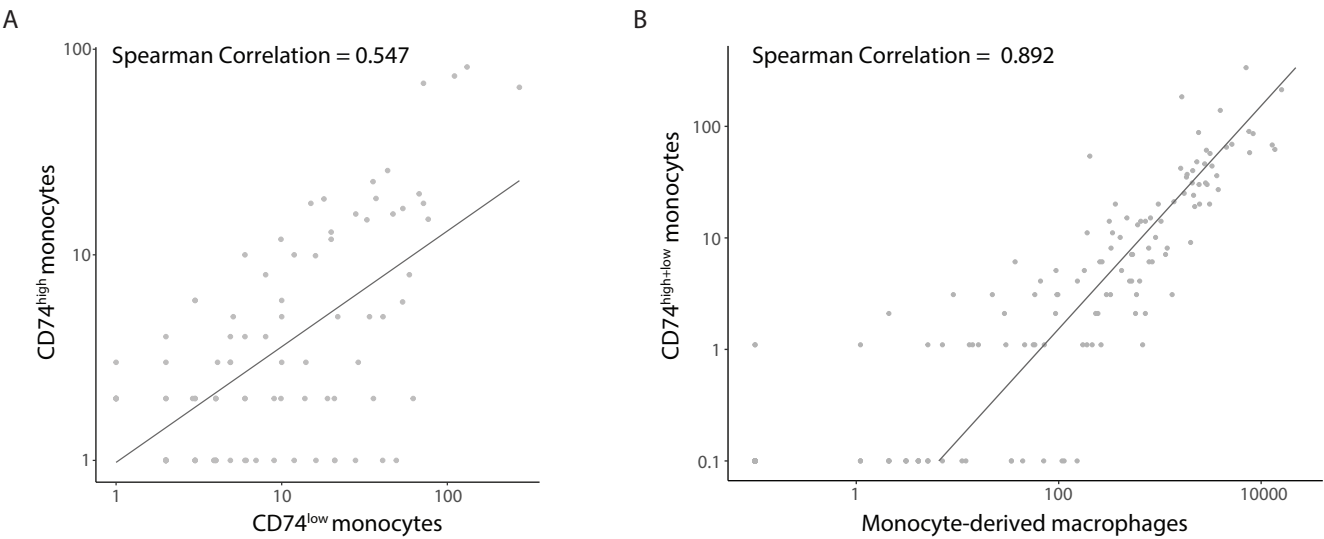

Supplement: supp [file elife_poa_e52168_Figure_6_figure_supplement_1.pdf › elife_poa_e52168_Figure_6_figure_supplement_1.pdf]

Figure 6- figure supplement 2

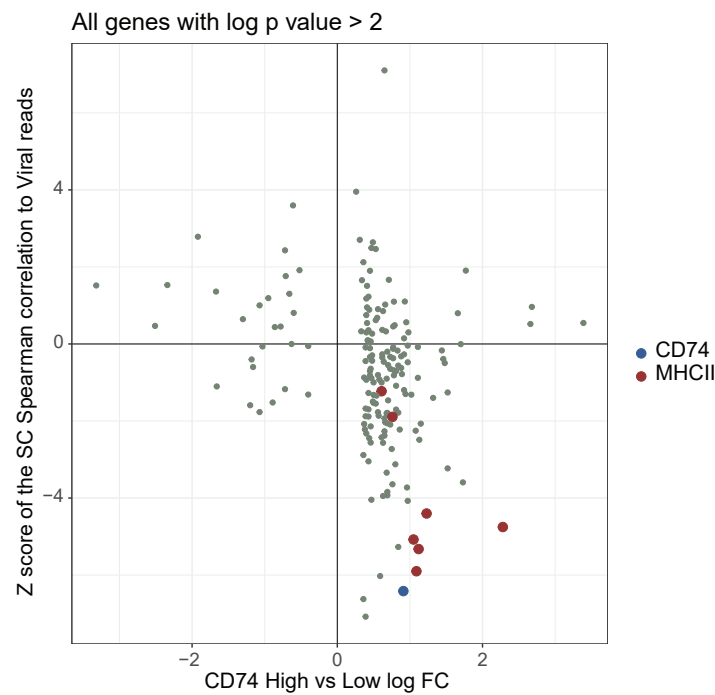

Supplement: supp [file elife_poa_e52168_Figure_6_figure_supplement_2.pdf › elife_poa_e52168_Figure_6_figure_supplement_2.pdf]

Figure 7- figure supplement 1

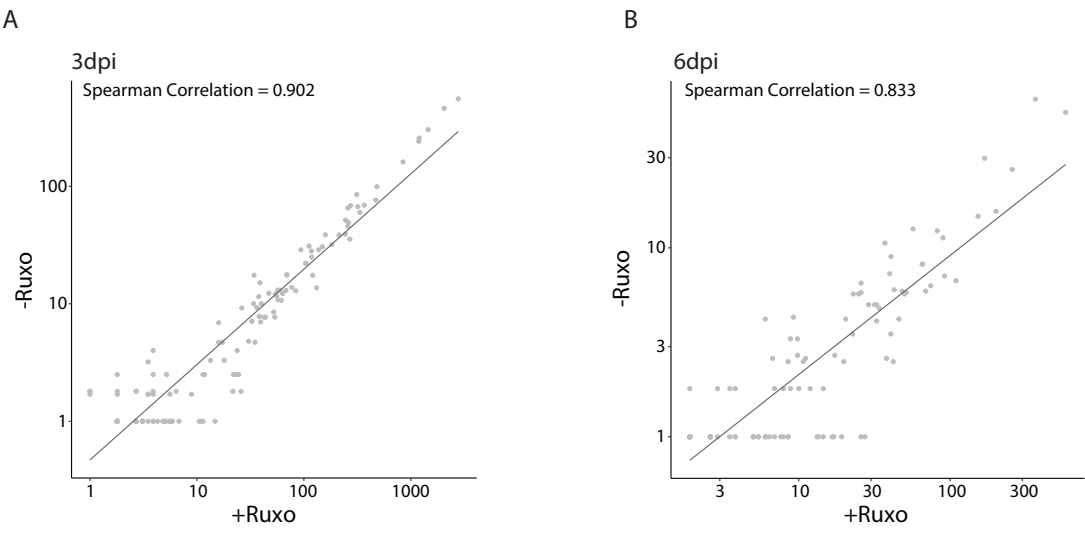

Supplement: supp [file elife_poa_e52168_Figure_7_figure_supplement_1.pdf › elife_poa_e52168_Figure_7_figure_supplement_1.pdf]
